# Supplementary material for: Ral GTPases promote breast cancer metastasis by controlling biogenesis and organ targeting of exosomes
Source: eLife. 2021 Jan 6;10:e61539. doi: 10.7554/eLife.61539 (PMC7822591; doi:10.7554/eLife.61539)
Supplement: Supplementary file 1. — Sheet a: RNAs overexpressed in EVs from 4T1 shCtl cells Vs EVs from shRalA cells Sheet b: RNAs overexpressed in EVs from 4T1 shRalA cells Vs EVs from shCtl cells Sheet c: RNAs overexpressed in EVs from 4T1 shCtl cells Vs EVs from shRalB cells Sheet d: RNAs overexpressed in EVs from 4T1 shRalB cells Vs EVs from shCtl cells [file elife-61539-supp1.xlsx]

## Sheet: Sheet_a
RNAs overexpressed in EVs from 4T1 shCtl cells Vs EVs from shRalA cells (padj<0,05; Log2FC>1)
RNA ID	symbol	genetype	log2FoldChange	padj
ENSMUSG00000022414,7	Tab1	protein_coding	2.76912	2.43026e-05
ENSMUSG00000048992,8	Prss32	protein_coding	2.74124	0.000271373
ENSMUSG00000097386,1	9130213A22Rik	protein_coding	2.69643	0.000136388
ENSMUSG00000041423,12	Paqr6	protein_coding	2.69544	0.000264686
ENSMUSG00000029061,2	Mmp23	protein_coding	2.67134	0.0010042
ENSMUSG00000086741,1	Gm15816	antisense	2.6691	0.00114255
ENSMUSG00000086514,1	Gm11747	antisense	2.63088	0.00218347
ENSMUSG00000020388,8	Pdlim4	protein_coding	2.60813	2.99388e-05
ENSMUSG00000025645,8	Ccdc51	protein_coding	2.59473	0.00101416
ENSMUSG00000023995,7	Tspo2	protein_coding	2.5706	3.99306e-05
ENSMUSG00000090185,1	Gm15523	antisense	2.53794	0.00360375
ENSMUSG00000035835,10	Lppr3	protein_coding	2.52524	2.28166e-05
ENSMUSG00000030087,7	Klf15	protein_coding	2.51538	0.000828083
ENSMUSG00000087516,3	Tbx3os1	antisense	2.51175	0.00253988
ENSMUSG00000064247,10	Plcxd1	protein_coding	2.50543	0.000263253
ENSMUSG00000005057,9	Sh2b2	protein_coding	2.4971	0.000163746
ENSMUSG00000046834,6	Krt1	protein_coding	2.46182	0.000818967
ENSMUSG00000074252,2	Gm10654	protein_coding	2.45918	0.000564152
ENSMUSG00000067615,3	Krt81	protein_coding	2.45456	0.000610924
ENSMUSG00000002280,6	Narfl	protein_coding	2.42178	5.31026e-05
ENSMUSG00000001029,11	Icam2	protein_coding	2.37042	0.000703995
ENSMUSG00000034105,8	Tldc1	protein_coding	2.3676	6.93366e-05
ENSMUSG00000051051,5	Olfr523	protein_coding	2.36517	0.00242941
ENSMUSG00000103653,1	WI1-1003N17,1	processed_pseudogene	2.35969	0.0073388
ENSMUSG00000028813,2	CK137956	protein_coding	2.35941	0.00129728
ENSMUSG00000023084,7	Lrrc71	protein_coding	2.3466	0.00020743
ENSMUSG00000050761,3	Gp1bb	protein_coding	2.34296	0.00792277
ENSMUSG00000047197,1	Gjd3	protein_coding	2.33526	0.00410569
ENSMUSG00000043099,4	Hic1	protein_coding	2.33479	0.000225532
ENSMUSG00000020591,10	Ntsr2	protein_coding	2.31209	0.00244377
ENSMUSG00000028976,6	Slc2a5	protein_coding	2.30534	0.000222423
ENSMUSG00000072487,6	Mroh5	protein_coding	2.3027	1.53613e-06
ENSMUSG00000103906,1	TIGD5	protein_coding	2.29271	0.0037318
ENSMUSG00000032852,3	Rspo4	protein_coding	2.29037	0.000499637
ENSMUSG00000032807,5	Alox12b	protein_coding	2.28927	0.000511779
ENSMUSG00000066964,2	Tmem211	protein_coding	2.2889	0.000800928
ENSMUSG00000042377,8	Fam83g	protein_coding	2.28473	5.88777e-07
ENSMUSG00000001751,9	Naglu	protein_coding	2.28355	0.000771326
ENSMUSG00000044551,9	9930012K11Rik	protein_coding	2.28051	0.00266127
ENSMUSG00000050058,6	Prm3	protein_coding	2.27957	0.00530921
ENSMUSG00000028538,8	St3gal3	protein_coding	2.27846	0.000268929
ENSMUSG00000079662,1	Ntn3	protein_coding	2.27692	0.000139952
ENSMUSG00000055681,10	Cope	protein_coding	2.27422	7.22632e-05
ENSMUSG00000036805,9	Noxa1	protein_coding	2.26967	0.00119111
ENSMUSG00000085823,3	Gm13012	antisense	2.2641	0.00211335
ENSMUSG00000002409,13	Dyrk1b	protein_coding	2.26409	0.00110812
ENSMUSG00000043144,5	Aqp6	protein_coding	2.26279	0.0035235
ENSMUSG00000066512,2	Klk1b5	protein_coding	2.25752	0.00761216
ENSMUSG00000035370,7	Adat3	protein_coding	2.25535	0.00381208
ENSMUSG00000005043,9	Sgsh	protein_coding	2.25279	0.000310635
ENSMUSG00000046637,2	Ttc34	protein_coding	2.25181	0.00180859
ENSMUSG00000006218,4	Fam131c	protein_coding	2.2508	0.00776544
ENSMUSG00000038489,8	Polr2l	protein_coding	2.24729	0.0100117
ENSMUSG00000061718,8	Ppp1r1b	protein_coding	2.24342	0.000518582
ENSMUSG00000045318,5	Adra2c	protein_coding	2.22408	0.00222387
ENSMUSG00000002504,10	Slc9a3r2	protein_coding	2.2138	0.00109934
ENSMUSG00000037188,7	Grhl3	protein_coding	2.21172	1.2376e-05
ENSMUSG00000020473,9	Aebp1	protein_coding	2.21145	3.80076e-05
ENSMUSG00000024116,5	Prss21	protein_coding	2.20647	0.00502922
ENSMUSG00000075416,5	Gm14488	processed_transcript	2.2058	0.00851692
ENSMUSG00000094913,2	Gm9507	protein_coding	2.19355	0.00802818
ENSMUSG00000033220,6	Rac2	protein_coding	2.19048	0.00128354
ENSMUSG00000048483,5	Zdhhc22	protein_coding	2.18637	0.000954438
ENSMUSG00000024395,7	Lims2	protein_coding	2.1843	0.012443
ENSMUSG00000048478,6	Spata33	protein_coding	2.17203	0.00465729
ENSMUSG00000024968,9	Rcor2	protein_coding	2.16906	4.54979e-05
ENSMUSG00000045288,10	Ush1g	protein_coding	2.16345	0.000473851
ENSMUSG00000086491,1	Gm13291	lincRNA	2.16342	0.00903979
ENSMUSG00000085933,2	Tmem61	lincRNA	2.15295	0.00165206
ENSMUSG00000023009,10	Nckap5l	protein_coding	2.14866	0.0011728
ENSMUSG00000085263,1	1700125G02Rik	antisense	2.14644	0.0145211
ENSMUSG00000040813,11	Tex264	protein_coding	2.1456	0.000368606
ENSMUSG00000024885,8	Aldh3b1	protein_coding	2.14365	0.000428467
ENSMUSG00000087090,3	Nctc1	processed_transcript	2.14233	0.00368679
ENSMUSG00000045174,10	Amer3	protein_coding	2.13841	0.00301703
ENSMUSG00000029005,4	Draxin	protein_coding	2.13689	0.000616542
ENSMUSG00000072963,2	Gm10447	protein_coding	2.13684	0.00270178
ENSMUSG00000090174,1	Gm10612	antisense	2.13643	0.00347117
ENSMUSG00000023008,14	Fmnl3	protein_coding	2.13374	1.12664e-05
ENSMUSG00000079258,1	Calhm1	protein_coding	2.12942	0.0012329
ENSMUSG00000034730,12	Bai1	protein_coding	2.12917	4.13069e-06
ENSMUSG00000032081,5	Apoc3	protein_coding	2.12073	0.00702225
ENSMUSG00000069678,6	Pcgf1	protein_coding	2.12045	0.00613533
ENSMUSG00000026810,8	Dpm2	protein_coding	2.12032	0.00764393
ENSMUSG00000057342,9	Sphk2	protein_coding	2.11876	0.000517406
ENSMUSG00000053613,6	Notumos	antisense	2.11385	0.0105969
ENSMUSG00000042485,6	Mustn1	protein_coding	2.10798	0.0145053
ENSMUSG00000103108,1	RP23-1D15,3	TEC	2.10694	0.00275648
ENSMUSG00000002100,11	Mybpc3	protein_coding	2.10374	1.86411e-05
ENSMUSG00000050822,7	Slc29a4	protein_coding	2.0996	0.00155279
ENSMUSG00000055707,8	Klhl26	protein_coding	2.099	0.00015999
ENSMUSG00000019278,4	Dpep1	protein_coding	2.09842	0.000970051
ENSMUSG00000024180,9	Tmem8	protein_coding	2.09326	1.67523e-05
ENSMUSG00000097620,3	4921514A10Rik	antisense	2.08655	0.0165996
ENSMUSG00000032589,10	Bsn	protein_coding	2.08581	6.91594e-08
ENSMUSG00000083907,1	Plk-ps1	processed_pseudogene	2.08516	0.00781383
ENSMUSG00000037295,6	Ldlrap1	protein_coding	2.08342	0.000465843
ENSMUSG00000048013,9	Krt35	protein_coding	2.08305	0.00250725
ENSMUSG00000034762,5	Glis1	protein_coding	2.08287	0.000556171
ENSMUSG00000029601,9	Iqcd	protein_coding	2.07914	0.00400418
ENSMUSG00000011305,7	Plin5	protein_coding	2.07746	0.00203842
ENSMUSG00000087244,1	Gm7284	unprocessed_pseudogene	2.07714	0.00645771
ENSMUSG00000061046,5	Haghl	protein_coding	2.0737	5.60824e-05
ENSMUSG00000083618,1	Gm11771	unprocessed_pseudogene	2.07228	0.00382078
ENSMUSG00000050666,9	Vstm4	protein_coding	2.07216	0.00439776
ENSMUSG00000024831,9	Ighmbp2	protein_coding	2.07018	2.99388e-05
ENSMUSG00000024889,3	Rce1	protein_coding	2.068	0.00128354
ENSMUSG00000020787,10	P2rx1	protein_coding	2.06738	0.00290419
ENSMUSG00000056629,11	Fkbp2	protein_coding	2.06553	0.0031562
ENSMUSG00000051107,4	Gm15440	protein_coding	2.06463	0.00992157
ENSMUSG00000022445,6	Cyp2d26	protein_coding	2.06269	0.00325529
ENSMUSG00000061397,7	Krt79	protein_coding	2.06173	0.00786942
ENSMUSG00000086405,1	9330198N18Rik	lincRNA	2.06164	0.01302
ENSMUSG00000039483,6	Asb6	protein_coding	2.06035	4.01776e-05
ENSMUSG00000015085,8	Entpd2	protein_coding	2.04923	0.00907436
ENSMUSG00000089223,1	Gm25048	snRNA	2.04846	0.0180287
ENSMUSG00000039263,12	Npepl1	protein_coding	2.04719	0.000177314
ENSMUSG00000024365,9	Cyp21a1	protein_coding	2.04522	0.000986071
ENSMUSG00000025792,5	Slc25a10	protein_coding	2.04498	0.000204495
ENSMUSG00000028073,11	Pear1	protein_coding	2.0397	1.22245e-05
ENSMUSG00000056174,8	Col8a2	protein_coding	2.03963	0.000722422
ENSMUSG00000025727,8	A930017K11Rik	protein_coding	2.03891	0.00549113
ENSMUSG00000039059,7	Hrh3	protein_coding	2.03872	0.00302846
ENSMUSG00000026944,14	Abca2	protein_coding	2.03756	1.49658e-07
ENSMUSG00000020811,12	Wscd1	protein_coding	2.03291	0.000226648
ENSMUSG00000062075,9	Lmnb2	protein_coding	2.03113	0.000265802
ENSMUSG00000022575,4	Gsdmd	protein_coding	2.03075	0.00895209
ENSMUSG00000083836,1	Ldha-ps2	processed_pseudogene	2.03002	0.0216579
ENSMUSG00000006342,10	Susd2	protein_coding	2.02678	0.000605121
ENSMUSG00000097424,2	1700030M09Rik	lincRNA	2.02475	0.00240419
ENSMUSG00000014602,11	Kif1a	protein_coding	2.02326	2.2005e-08
ENSMUSG00000041351,12	Rap1gap	protein_coding	2.02303	3.80076e-05
ENSMUSG00000027570,11	Col9a3	protein_coding	2.02222	8.27127e-05
ENSMUSG00000087317,1	4930466I24Rik	antisense	2.02142	0.0142614
ENSMUSG00000049653,4	Spatc1	protein_coding	2.01983	0.0154407
ENSMUSG00000094504,1	Gm5294	protein_coding	2.01894	0.0155029
ENSMUSG00000097183,1	Gm17501	lincRNA	2.01888	0.02354
ENSMUSG00000045246,7	Kcng4	protein_coding	2.01715	5.90784e-05
ENSMUSG00000024175,1	Tekt4	protein_coding	2.01674	0.0037829
ENSMUSG00000031972,4	Acta1	protein_coding	2.01668	0.0017921
ENSMUSG00000024215,9	Spdef	protein_coding	2.01621	0.00381208
ENSMUSG00000034185,9	6430628N08Rik	lincRNA	2.01058	0.0194602
ENSMUSG00000030544,5	Mesp1	protein_coding	2.01009	0.0164015
ENSMUSG00000024399,5	Ltb	protein_coding	2.00663	0.0115227
ENSMUSG00000079511,5	Ccdc142	protein_coding	2.00274	0.00325244
ENSMUSG00000051067,7	Lingo3	protein_coding	1.99983	0.00590304
ENSMUSG00000021256,5	Vash1	protein_coding	1.99896	0.00142705
ENSMUSG00000024334,8	H2-Oa	protein_coding	1.99881	0.00474475
ENSMUSG00000034209,4	Rasl10a	protein_coding	1.9966	0.0212858
ENSMUSG00000051427,10	Ccdc157	protein_coding	1.99544	9.29223e-05
ENSMUSG00000061742,7	Slc22a12	protein_coding	1.99396	0.000416585
ENSMUSG00000025329,3	Padi1	protein_coding	1.99377	0.00166809
ENSMUSG00000074652,3	Myh7b	protein_coding	1.99264	5.05445e-06
ENSMUSG00000037813,9	D630003M21Rik	protein_coding	1.99111	0.00014587
ENSMUSG00000025375,11	Aatk	protein_coding	1.99018	4.11995e-05
ENSMUSG00000036820,7	Amdhd2	protein_coding	1.98716	0.000505401
ENSMUSG00000078350,7	Smim1	protein_coding	1.98699	0.00178893
ENSMUSG00000022994,8	Adcy6	protein_coding	1.98545	7.30246e-05
ENSMUSG00000040841,5	Six5	protein_coding	1.98095	0.00405918
ENSMUSG00000030340,12	Scnn1a	protein_coding	1.98052	5.56087e-06
ENSMUSG00000038775,10	Vill	protein_coding	1.98004	3.73163e-05
ENSMUSG00000025377,10	Enthd2	protein_coding	1.97948	0.000772701
ENSMUSG00000024663,13	Rab3il1	protein_coding	1.97565	1.22245e-05
ENSMUSG00000002346,12	Slc25a42	protein_coding	1.97559	5.32151e-05
ENSMUSG00000074473,1	A230072I06Rik	protein_coding	1.97495	0.000271373
ENSMUSG00000039062,11	Anpep	protein_coding	1.97293	0.000193182
ENSMUSG00000028758,8	Kif17	protein_coding	1.97293	0.000265802
ENSMUSG00000047507,8	Baiap3	protein_coding	1.97077	0.000193706
ENSMUSG00000100573,1	1700081H04Rik	lincRNA	1.97063	0.0151614
ENSMUSG00000092471,1	Cyp21a2-ps	unprocessed_pseudogene	1.97061	0.00607953
ENSMUSG00000034412,9	Tbc1d10a	protein_coding	1.96779	0.00138715
ENSMUSG00000025226,7	Fbxl15	protein_coding	1.96747	0.00237991
ENSMUSG00000035262,4	Amh	protein_coding	1.96548	0.0252215
ENSMUSG00000046719,7	Nxph3	protein_coding	1.96421	0.0087386
ENSMUSG00000100493,1	Gm29294	lincRNA	1.96374	0.0137906
ENSMUSG00000028749,7	Pla2g2f	protein_coding	1.96284	0.00393107
ENSMUSG00000014351,8	Gip	protein_coding	1.95859	0.00171699
ENSMUSG00000032741,8	Tpcn1	protein_coding	1.95726	6.75909e-05
ENSMUSG00000036067,8	Slc2a6	protein_coding	1.95721	0.00455146
ENSMUSG00000009097,9	Tbx1	protein_coding	1.95707	0.0275627
ENSMUSG00000049739,9	Zfp646	protein_coding	1.95533	2.07437e-05
ENSMUSG00000033006,9	Sox10	protein_coding	1.95459	2.99388e-05
ENSMUSG00000039079,1	Trhr2	protein_coding	1.95413	0.0252084
ENSMUSG00000025736,10	Jmjd8	protein_coding	1.95403	0.00210928
ENSMUSG00000029119,5	Man2b2	protein_coding	1.95331	0.00013263
ENSMUSG00000028070,7	Apoa1bp	protein_coding	1.95331	0.0268471
ENSMUSG00000018862,7	Otop3	protein_coding	1.95179	0.00533309
ENSMUSG00000008855,13	Hdac5	protein_coding	1.95147	6.00556e-06
ENSMUSG00000032754,10	Slc8b1	protein_coding	1.95103	0.000150862
ENSMUSG00000054662,7	Ano9	protein_coding	1.95049	0.00082355
ENSMUSG00000037379,4	Spon2	protein_coding	1.95047	0.00399118
ENSMUSG00000024027,7	Glp1r	protein_coding	1.95	0.00265559
ENSMUSG00000030761,11	Myo7a	protein_coding	1.94865	1.24189e-05
ENSMUSG00000031489,10	Adrb3	protein_coding	1.94726	0.000501182
ENSMUSG00000037962,3	Fam101a	protein_coding	1.94685	0.01327
ENSMUSG00000027215,9	Cd82	protein_coding	1.94616	0.00173392
ENSMUSG00000040663,8	Clcf1	protein_coding	1.94563	2.87247e-06
ENSMUSG00000067613,5	5430421N21Rik	protein_coding	1.94349	0.00629697
ENSMUSG00000036500,4	Akp3	protein_coding	1.94346	0.0106598
ENSMUSG00000028795,11	Ccdc28b	protein_coding	1.94344	0.0272631
ENSMUSG00000033770,9	Clcnka	protein_coding	1.94272	0.00102463
ENSMUSG00000025158,7	Rfng	protein_coding	1.94092	0.00759917
ENSMUSG00000097915,1	A330009N23Rik	lincRNA	1.94056	0.0185701
ENSMUSG00000035493,9	Tgfbi	protein_coding	1.9387	0.00112091
ENSMUSG00000025730,10	Rab40c	protein_coding	1.93504	0.000370674
ENSMUSG00000093489,1	Gm20625	lincRNA	1.93284	0.0292218
ENSMUSG00000044055,5	Otos	protein_coding	1.93249	0.00316511
ENSMUSG00000097088,1	Gm26615	lincRNA	1.93161	0.010888
ENSMUSG00000031840,8	Rab3a	protein_coding	1.93042	0.0105645
ENSMUSG00000022596,3	Slurp1	protein_coding	1.93007	0.0193749
ENSMUSG00000097476,1	Gm26583	lincRNA	1.92855	0.000738532
ENSMUSG00000026424,8	Gpr37l1	protein_coding	1.92402	0.00293953
ENSMUSG00000066235,6	Pomgnt2	protein_coding	1.92398	0.0117735
ENSMUSG00000046718,7	Bst2	protein_coding	1.92249	0.0265433
ENSMUSG00000032491,10	Nradd	protein_coding	1.92042	0.0206522
ENSMUSG00000024738,5	Pga5	protein_coding	1.91944	0.00148675
ENSMUSG00000025425,13	St8sia5	protein_coding	1.91907	0.0325526
ENSMUSG00000024936,7	Kcnk7	protein_coding	1.91575	0.00444193
ENSMUSG00000022986,5	Krt75	protein_coding	1.91416	0.00486811
ENSMUSG00000060794,6	Tssk5	protein_coding	1.91404	0.011922
ENSMUSG00000030329,7	Pianp	protein_coding	1.91399	0.000492618
ENSMUSG00000019464,5	Ptger1	protein_coding	1.9117	0.000980699
ENSMUSG00000073434,7	Wdr90	protein_coding	1.91073	2.70052e-06
ENSMUSG00000094840,1	A630081J09Rik	protein_coding	1.91033	0.00470528
ENSMUSG00000051054,3	1700014D04Rik	protein_coding	1.90964	0.00427372
ENSMUSG00000037126,11	Psd	protein_coding	1.90963	7.54949e-06
ENSMUSG00000096712,1	Gm15454	processed_pseudogene	1.90679	0.0305715
ENSMUSG00000075024,2	Gm10803	protein_coding	1.90652	0.0103384
ENSMUSG00000089757,1	Gm16334	processed_transcript	1.9062	0.0335741
ENSMUSG00000020785,13	Camkk1	protein_coding	1.90516	0.000795614
ENSMUSG00000045281,5	Gpr20	protein_coding	1.90324	0.0144377
ENSMUSG00000024942,12	Capn1	protein_coding	1.89811	5.82552e-05
ENSMUSG00000101179,1	Gm29455	lincRNA	1.89739	0.00372964
ENSMUSG00000035172,11	Plekhh3	protein_coding	1.89529	0.0053375
ENSMUSG00000015377,9	Dennd6b	protein_coding	1.8935	0.00137975
ENSMUSG00000043664,6	Tmem221	protein_coding	1.89289	0.0181745
ENSMUSG00000085511,1	Gm11738	antisense	1.89164	0.0306013
ENSMUSG00000096257,1	Gm6537	protein_coding	1.89046	0.00536052
ENSMUSG00000038457,12	Tmem255b	protein_coding	1.89041	0.0112166
ENSMUSG00000085833,2	Gm13003	lincRNA	1.88753	0.00405227
ENSMUSG00000010021,9	Kif19a	protein_coding	1.88735	0.000112407
ENSMUSG00000053647,4	Gper1	protein_coding	1.88716	0.000648114
ENSMUSG00000028744,11	Pqlc2	protein_coding	1.88624	0.000696342
ENSMUSG00000034570,8	Inpp5j	protein_coding	1.88588	0.000688918
ENSMUSG00000066952,7	Myo1h	protein_coding	1.88541	2.01465e-05
ENSMUSG00000031834,11	Pik3r2	protein_coding	1.88376	4.11995e-05
ENSMUSG00000014782,11	Plekhg4	protein_coding	1.88226	0.000113817
ENSMUSG00000041120,6	Nbl1	protein_coding	1.88167	0.00680004
ENSMUSG00000078600,1	1700092K14Rik	processed_transcript	1.87955	0.0277139
ENSMUSG00000038888,8	Ctu1	protein_coding	1.87781	0.0159036
ENSMUSG00000022951,11	Rcan1	protein_coding	1.87766	0.00783738
ENSMUSG00000029032,8	Arhgef16	protein_coding	1.8775	0.000898277
ENSMUSG00000004933,13	Matk	protein_coding	1.87553	0.00130397
ENSMUSG00000031833,9	Mast3	protein_coding	1.87541	0.000348297
ENSMUSG00000034255,13	Arhgap27	protein_coding	1.87532	8.47277e-05
ENSMUSG00000050751,10	Pgbd5	protein_coding	1.87497	4.66733e-05
ENSMUSG00000025478,11	Dpysl4	protein_coding	1.87496	0.000336624
ENSMUSG00000011267,7	Zfp296	protein_coding	1.87313	0.00129728
ENSMUSG00000029603,11	Dtx1	protein_coding	1.87145	0.00087947
ENSMUSG00000021567,10	Nkd2	protein_coding	1.87097	0.00272816
ENSMUSG00000021194,5	Chga	protein_coding	1.86859	0.000630186
ENSMUSG00000007833,9	Aldh16a1	protein_coding	1.86764	0.00259505
ENSMUSG00000022416,11	Cacna1i	protein_coding	1.8675	6.45234e-07
ENSMUSG00000016028,9	Celsr1	protein_coding	1.8674	7.61874e-06
ENSMUSG00000084891,1	Gm12958	lincRNA	1.86713	0.0275313
ENSMUSG00000048277,11	Syngr2	protein_coding	1.86711	0.00725009
ENSMUSG00000085047,1	Gm13026	lincRNA	1.86377	0.0371483
ENSMUSG00000009092,4	Derl3	protein_coding	1.86343	0.0226449
ENSMUSG00000051373,5	Ppapdc3	protein_coding	1.86173	0.0227015
ENSMUSG00000097305,1	Gm17276	lincRNA	1.85948	0.0178769
ENSMUSG00000016758,3	Bik	protein_coding	1.85901	0.0191762
ENSMUSG00000052135,8	Foxo6	protein_coding	1.85528	0.00981172
ENSMUSG00000037974,11	Muc5ac	protein_coding	1.85445	4.97514e-06
ENSMUSG00000027376,11	Prom2	protein_coding	1.8515	0.000402403
ENSMUSG00000043017,9	Ptgir	protein_coding	1.85075	0.00393107
ENSMUSG00000031486,10	Gpr124	protein_coding	1.85032	4.09953e-05
ENSMUSG00000047986,8	Palm3	protein_coding	1.85025	2.28166e-05
ENSMUSG00000064147,6	Rab44	protein_coding	1.85017	0.00114255
ENSMUSG00000060166,5	Zdhhc8	protein_coding	1.85017	0.00106036
ENSMUSG00000026925,12	Inpp5e	protein_coding	1.8498	0.00731249
ENSMUSG00000044197,8	Gpr146	protein_coding	1.84921	0.0016479
ENSMUSG00000097087,1	Gm26878	lincRNA	1.84899	0.0346741
ENSMUSG00000070867,4	Trabd2b	protein_coding	1.84892	0.000513682
ENSMUSG00000075296,4	Aldh3b2	protein_coding	1.84888	0.00351078
ENSMUSG00000039834,13	Zfp335	protein_coding	1.84844	0.00190497
ENSMUSG00000022475,14	Hdac7	protein_coding	1.84622	7.30246e-05
ENSMUSG00000036622,11	Atp13a2	protein_coding	1.84469	0.000128617
ENSMUSG00000007039,8	Ddah2	protein_coding	1.84186	0.0111241
ENSMUSG00000034917,7	Tjp3	protein_coding	1.84095	0.000674277
ENSMUSG00000028860,9	Sytl1	protein_coding	1.84087	0.00347959
ENSMUSG00000084993,1	Gm12305	sense_intronic	1.84055	0.0212011
ENSMUSG00000002249,13	Tead3	protein_coding	1.84028	0.00601649
ENSMUSG00000025743,10	Sdc3	protein_coding	1.8402	0.000513557
ENSMUSG00000073430,4	Gm10505	lincRNA	1.84007	0.00220804
ENSMUSG00000021904,5	Sema3g	protein_coding	1.83765	0.000147126
ENSMUSG00000046491,6	C1qtnf2	protein_coding	1.83711	0.0244775
ENSMUSG00000031832,10	Taf1c	protein_coding	1.83697	0.00105205
ENSMUSG00000038271,13	Iffo1	protein_coding	1.8364	0.00305389
ENSMUSG00000006315,8	Tmem147	protein_coding	1.83575	0.0306043
ENSMUSG00000048826,6	Dact2	protein_coding	1.83492	0.00347959
ENSMUSG00000020216,9	Jsrp1	protein_coding	1.83476	0.00911683
ENSMUSG00000082286,6	Pisd-ps1	transcribed_unprocessed_pseudogene	1.83467	2.95113e-08
ENSMUSG00000040767,6	Snrnp25	protein_coding	1.83297	0.00893722
ENSMUSG00000031891,5	Hsd11b2	protein_coding	1.8315	0.00776398
ENSMUSG00000023411,7	Nfatc4	protein_coding	1.83044	0.00526451
ENSMUSG00000032596,10	Uba7	protein_coding	1.82969	0.000227485
ENSMUSG00000028838,7	Extl1	protein_coding	1.8293	0.00476538
ENSMUSG00000045912,8	C2cd4c	protein_coding	1.82869	0.000345073
ENSMUSG00000025732,5	Fam195a	protein_coding	1.82762	0.0360154
ENSMUSG00000043782,8	Ccdc64b	protein_coding	1.82693	0.00961792
ENSMUSG00000008140,13	Emc10	protein_coding	1.82426	0.0029556
ENSMUSG00000020167,10	Tcf3	protein_coding	1.82389	0.000111963
ENSMUSG00000031849,8	Comp	protein_coding	1.82296	0.000505359
ENSMUSG00000018634,10	Crhr1	protein_coding	1.82266	0.00267485
ENSMUSG00000059562,10	Ccdc154	protein_coding	1.82242	0.00091816
ENSMUSG00000021298,7	Gpr132	protein_coding	1.8213	0.005622
ENSMUSG00000050357,8	Rltpr	protein_coding	1.82109	0.000111516
ENSMUSG00000036565,3	Ttyh3	protein_coding	1.82065	0.000176511
ENSMUSG00000032788,10	Pdxk	protein_coding	1.82056	0.000220285
ENSMUSG00000027510,13	Rbm38	protein_coding	1.82055	0.0091449
ENSMUSG00000006462,6	A530013C23Rik	lincRNA	1.81944	0.00084425
ENSMUSG00000003575,9	Crtc1	protein_coding	1.8166	5.88777e-07
ENSMUSG00000062044,9	Lmtk3	protein_coding	1.81633	0.000263253
ENSMUSG00000027517,9	Ankrd60	protein_coding	1.81525	0.0278353
ENSMUSG00000048489,9	8430408G22Rik	protein_coding	1.81394	0.0291954
ENSMUSG00000097432,1	Gm20603	lincRNA	1.81314	0.0358849
ENSMUSG00000040276,10	Pacsin1	protein_coding	1.8131	0.000277874
ENSMUSG00000023259,12	Slc26a6	protein_coding	1.81206	0.000112407
ENSMUSG00000035711,4	Dok3	protein_coding	1.81193	0.0345892
ENSMUSG00000086064,1	4930439A04Rik	antisense	1.81065	0.018536
ENSMUSG00000009900,7	Wnt3a	protein_coding	1.80965	0.00345446
ENSMUSG00000024223,2	Armc12	protein_coding	1.80945	0.018536
ENSMUSG00000011832,11	Evi5l	protein_coding	1.80907	2.07437e-05
ENSMUSG00000040263,12	Klhdc4	protein_coding	1.80793	9.50071e-06
ENSMUSG00000008734,8	Gprc5b	protein_coding	1.80668	0.00191165
ENSMUSG00000081524,3	Gm11658	processed_pseudogene	1.80646	0.0346761
ENSMUSG00000024737,2	Slc15a3	protein_coding	1.80626	1.19096e-05
ENSMUSG00000102640,1	RP24-323H7,4	TEC	1.80622	0.0362229
ENSMUSG00000004187,10	Kifc2	protein_coding	1.80573	0.00153067
ENSMUSG00000078691,3	Gm6821	unprocessed_pseudogene	1.80537	0.0457009
ENSMUSG00000090509,2	Sfta2	protein_coding	1.80245	0.0215467
ENSMUSG00000039623,9	Ap5z1	protein_coding	1.80201	0.00372964
ENSMUSG00000063952,11	Brpf3	protein_coding	1.80131	1.28603e-05
ENSMUSG00000024847,10	Aip	protein_coding	1.80121	0.00845291
ENSMUSG00000041544,11	Ptchd2	protein_coding	1.8001	0.000298872
ENSMUSG00000048232,8	Fbxo10	protein_coding	1.7995	0.0035235
ENSMUSG00000070699,4	Sars2	protein_coding	1.79769	0.0110936
ENSMUSG00000058216,8	BC021614	protein_coding	1.79572	0.00883425
ENSMUSG00000086975,1	Gm15208	lincRNA	1.79396	0.0294643
ENSMUSG00000015599,8	Ttbk1	protein_coding	1.79154	1.30835e-05
ENSMUSG00000079484,8	Phyhd1	protein_coding	1.79142	0.0366303
ENSMUSG00000016624,11	Phf21b	protein_coding	1.79101	0.00132771
ENSMUSG00000071195,3	Gm10318	unprocessed_pseudogene	1.78901	0.0354198
ENSMUSG00000051246,1	Msantd1	protein_coding	1.78877	0.0103384
ENSMUSG00000063239,12	Grm4	protein_coding	1.78871	7.22632e-05
ENSMUSG00000041347,5	Bdkrb1	protein_coding	1.78777	0.0285659
ENSMUSG00000054708,13	Ankrd24	protein_coding	1.78745	2.07437e-05
ENSMUSG00000038224,8	Serpinf2	protein_coding	1.78652	0.00187114
ENSMUSG00000079654,3	Prrt4	protein_coding	1.78546	0.00649569
ENSMUSG00000000325,11	Arvcf	protein_coding	1.78497	0.000614109
ENSMUSG00000032860,4	P2ry2	protein_coding	1.78454	0.00572645
ENSMUSG00000020605,8	Hs1bp3	protein_coding	1.78413	0.00317632
ENSMUSG00000029033,12	Acap3	protein_coding	1.78347	0.000234649
ENSMUSG00000028785,8	Hpca	protein_coding	1.78289	0.00593796
ENSMUSG00000001062,13	Vps9d1	protein_coding	1.78176	0.00013263
ENSMUSG00000001419,13	Mef2d	protein_coding	1.78105	0.000898277
ENSMUSG00000040061,13	Plcb2	protein_coding	1.77932	0.00013263
ENSMUSG00000000934,8	Top1mt	protein_coding	1.77932	0.0121762
ENSMUSG00000060572,13	Mfap2	protein_coding	1.77919	0.0187001
ENSMUSG00000021061,11	Sptb	protein_coding	1.77911	3.20032e-06
ENSMUSG00000019312,6	Grb7	protein_coding	1.77907	0.000798641
ENSMUSG00000028836,10	Slc30a2	protein_coding	1.77903	0.0105995
ENSMUSG00000032812,12	Arap1	protein_coding	1.7779	2.48555e-05
ENSMUSG00000050022,12	Amz1	protein_coding	1.77751	7.18832e-05
ENSMUSG00000022579,6	Gpihbp1	protein_coding	1.77598	0.0371991
ENSMUSG00000024134,11	Six2	protein_coding	1.77314	0.013021
ENSMUSG00000006476,15	Nsmf	protein_coding	1.77222	0.000519784
ENSMUSG00000024870,5	Rab1b	protein_coding	1.77217	0.00331421
ENSMUSG00000038967,9	Pdk2	protein_coding	1.77181	0.00173162
ENSMUSG00000021280,8	Exoc3l4	protein_coding	1.77117	0.000843787
ENSMUSG00000059741,9	Myl3	protein_coding	1.76988	0.0420177
ENSMUSG00000020916,8	Krt36	protein_coding	1.76947	0.00953781
ENSMUSG00000078815,4	Cacng6	protein_coding	1.76869	0.0306115
ENSMUSG00000047417,13	Rexo1	protein_coding	1.76862	0.000111516
ENSMUSG00000040532,10	Abhd11	protein_coding	1.76859	0.00361474
ENSMUSG00000037992,12	Rara	protein_coding	1.76769	0.00129728
ENSMUSG00000032744,4	Heyl	protein_coding	1.76727	0.00676502
ENSMUSG00000022602,10	Arc	protein_coding	1.76725	0.0263354
ENSMUSG00000035773,5	Kiss1r	protein_coding	1.76563	0.00490311
ENSMUSG00000024266,7	Adad2	protein_coding	1.76501	0.00795027
ENSMUSG00000104445,1	Rhbg	protein_coding	1.76485	0.0479517
ENSMUSG00000018339,7	Gpx3	protein_coding	1.76348	0.0239062
ENSMUSG00000047884,5	Klk9	protein_coding	1.76336	0.0247375
ENSMUSG00000022394,10	L3mbtl2	protein_coding	1.763	0.000827576
ENSMUSG00000020325,10	Fstl3	protein_coding	1.76222	0.01997
ENSMUSG00000048385,8	Scrt1	protein_coding	1.76189	0.00400465
ENSMUSG00000041798,11	Gck	protein_coding	1.76121	0.0209836
ENSMUSG00000040690,11	Col16a1	protein_coding	1.76076	1.18669e-05
ENSMUSG00000036813,7	Entpd8	protein_coding	1.76065	0.0107731
ENSMUSG00000036578,6	Fxyd7	protein_coding	1.76024	0.0374108
ENSMUSG00000032182,10	Yipf2	protein_coding	1.76021	0.0424707
ENSMUSG00000098048,1	Gm8330	processed_pseudogene	1.75829	0.0250893
ENSMUSG00000004934,9	Pias4	protein_coding	1.75803	0.000722422
ENSMUSG00000002980,10	Bcam	protein_coding	1.75785	0.00173162
ENSMUSG00000003341,8	Atp8b3	protein_coding	1.75754	0.000505401
ENSMUSG00000027950,3	Chrnb2	protein_coding	1.75741	0.00266127
ENSMUSG00000007207,6	Stx1a	protein_coding	1.75712	0.0115455
ENSMUSG00000040680,8	Kremen2	protein_coding	1.75567	0.0107945
ENSMUSG00000081683,5	Fzd10	protein_coding	1.75282	0.036284
ENSMUSG00000038319,10	Kcnh2	protein_coding	1.75261	0.000752144
ENSMUSG00000021381,4	Barx1	protein_coding	1.75179	0.0167633
ENSMUSG00000078907,1	Fam186b	protein_coding	1.75131	0.00147779
ENSMUSG00000037820,11	Tgm2	protein_coding	1.75105	0.0003772
ENSMUSG00000046182,7	Gsg1l	protein_coding	1.75018	0.000901052
ENSMUSG00000036596,5	Cpz	protein_coding	1.74909	0.00228595
ENSMUSG00000043644,4	0610009L18Rik	protein_coding	1.7487	0.0445032
ENSMUSG00000035551,6	Igfbpl1	protein_coding	1.74858	0.016233
ENSMUSG00000067818,6	Myl9	protein_coding	1.74835	0.0480893
ENSMUSG00000025161,12	Slc16a3	protein_coding	1.74765	0.0020697
ENSMUSG00000083767,1	Gm11405	processed_pseudogene	1.74722	0.033235
ENSMUSG00000036553,12	Sh3tc1	protein_coding	1.74679	0.000173994
ENSMUSG00000066705,6	Fxyd6	protein_coding	1.74605	0.0302645
ENSMUSG00000078127,2	Fam170b	protein_coding	1.7458	0.0271903
ENSMUSG00000034677,5	Gpr142	protein_coding	1.74565	0.020002
ENSMUSG00000020734,9	Grin2c	protein_coding	1.74553	0.00184556
ENSMUSG00000032511,13	Scn5a	protein_coding	1.74551	1.19965e-06
ENSMUSG00000045322,10	Tlr9	protein_coding	1.74467	0.00399238
ENSMUSG00000026938,10	Fcna	protein_coding	1.74429	0.0337369
ENSMUSG00000072720,5	Myo18b	protein_coding	1.74409	8.31189e-07
ENSMUSG00000027371,6	Fahd2a	protein_coding	1.74326	0.0425847
ENSMUSG00000038500,11	Prr3	protein_coding	1.74322	0.000112407
ENSMUSG00000015090,9	Ptgds	protein_coding	1.74199	0.040103
ENSMUSG00000087075,1	A230065H16Rik	protein_coding	1.74186	0.0313924
ENSMUSG00000049562,5	Ap5b1	protein_coding	1.7415	0.00776075
ENSMUSG00000090457,1	4930571K23Rik	protein_coding	1.74131	0.0336329
ENSMUSG00000019823,13	Mical1	protein_coding	1.74108	0.000136388
ENSMUSG00000054161,10	Fam83e	protein_coding	1.74038	0.018648
ENSMUSG00000028661,8	Epha8	protein_coding	1.74022	0.00241455
ENSMUSG00000024254,11	Abcg8	protein_coding	1.73869	0.000797412
ENSMUSG00000010064,11	Slc38a3	protein_coding	1.73863	0.000117877
ENSMUSG00000028917,10	Plekhm2	protein_coding	1.73687	0.000505401
ENSMUSG00000090113,3	Nhlrc4	protein_coding	1.73579	0.0222382
ENSMUSG00000030351,4	Tspan11	protein_coding	1.73547	0.00196146
ENSMUSG00000063605,5	Ccdc102a	protein_coding	1.7344	0.000158377
ENSMUSG00000097889,1	Gm26541	lincRNA	1.7344	0.0185309
ENSMUSG00000020090,6	Npffr1	protein_coding	1.73432	0.00932141
ENSMUSG00000084983,3	Gm11789	antisense	1.73316	0.016563
ENSMUSG00000039577,13	Nphp4	protein_coding	1.73302	0.000117877
ENSMUSG00000054999,2	Naaladl1	protein_coding	1.73196	3.90953e-05
ENSMUSG00000025644,10	Gm7628	protein_coding	1.73182	0.0329475
ENSMUSG00000042535,8	Gtpbp1	protein_coding	1.73073	0.0012026
ENSMUSG00000000359,3	Rem1	protein_coding	1.72747	0.0218406
ENSMUSG00000074622,4	Mafb	protein_coding	1.72651	0.012567
ENSMUSG00000035355,11	Kcnh4	protein_coding	1.72647	0.000307875
ENSMUSG00000019027,7	Dnah1	protein_coding	1.72555	6.72788e-07
ENSMUSG00000093394,1	Gm20621	sense_overlapping	1.72517	0.0469425
ENSMUSG00000068551,8	Zfp467	protein_coding	1.72496	0.00128354
ENSMUSG00000068327,4	Tlx2	protein_coding	1.7249	0.0389363
ENSMUSG00000084876,3	Gm14965	processed_transcript	1.72444	0.0419017
ENSMUSG00000032523,6	Hhatl	protein_coding	1.72292	0.000865713
ENSMUSG00000075408,5	6030408B16Rik	lincRNA	1.72259	0.0448751
ENSMUSG00000037944,8	Ccr7	protein_coding	1.72255	0.0213966
ENSMUSG00000035397,8	Klf16	protein_coding	1.7224	0.0100876
ENSMUSG00000033862,6	Cdk10	protein_coding	1.72181	0.0021459
ENSMUSG00000043430,5	Psapl1	protein_coding	1.72179	0.0131777
ENSMUSG00000002057,4	Foxn1	protein_coding	1.72077	0.0105465
ENSMUSG00000074651,2	Mcidas	protein_coding	1.72021	0.0233068
ENSMUSG00000022613,4	Miox	protein_coding	1.72014	0.0393655
ENSMUSG00000048200,7	Cracr2b	protein_coding	1.71999	0.040832
ENSMUSG00000037679,8	Inf2	protein_coding	1.71985	0.000104892
ENSMUSG00000004947,11	Dtx2	protein_coding	1.71964	5.60939e-05
ENSMUSG00000063765,7	Chadl	protein_coding	1.71756	0.00685837
ENSMUSG00000034845,5	Plvap	protein_coding	1.71694	0.0018971
ENSMUSG00000048450,10	Msx1	protein_coding	1.71592	0.0287961
ENSMUSG00000031070,11	Mrgprf	protein_coding	1.71485	0.0247003
ENSMUSG00000029095,13	Ablim2	protein_coding	1.714	6.03349e-06
ENSMUSG00000020932,10	Gfap	protein_coding	1.71391	0.000505401
ENSMUSG00000099440,1	Gm29593	lincRNA	1.71238	0.0453033
ENSMUSG00000023336,5	Wfdc1	protein_coding	1.71212	0.0147328
ENSMUSG00000021278,6	Amn	protein_coding	1.71115	0.0178446
ENSMUSG00000027484,2	Bpifa5	protein_coding	1.71051	0.012785
ENSMUSG00000097320,4	C630016N16Rik	antisense	1.70969	0.0493652
ENSMUSG00000083436,1	Gm11471	processed_pseudogene	1.70945	0.0425114
ENSMUSG00000030409,11	Dmpk	protein_coding	1.70758	0.00160668
ENSMUSG00000084856,1	Gm11528	lincRNA	1.70705	0.00400036
ENSMUSG00000044562,10	Rasip1	protein_coding	1.70696	0.0226449
ENSMUSG00000079051,4	Gm14025	protein_coding	1.70688	0.0433635
ENSMUSG00000034664,9	Itga2b	protein_coding	1.70687	0.000146674
ENSMUSG00000006435,11	Neurl1a	protein_coding	1.70658	0.00132771
ENSMUSG00000029575,13	Mmab	protein_coding	1.70573	0.00294661
ENSMUSG00000040751,8	Lat2	protein_coding	1.70384	0.00447561
ENSMUSG00000030595,11	Nfkbib	protein_coding	1.70242	0.0336073
ENSMUSG00000029778,8	Adcyap1r1	protein_coding	1.70223	0.000505984
ENSMUSG00000091735,2	Gpr62	protein_coding	1.70194	0.0222288
ENSMUSG00000033021,12	Gmppa	protein_coding	1.70171	0.0087386
ENSMUSG00000067629,6	Syngap1	protein_coding	1.70034	2.0507e-05
ENSMUSG00000095970,1	Gm19402	protein_coding	1.70018	0.0485954
ENSMUSG00000022420,11	Dnal4	protein_coding	1.70005	0.0211744
ENSMUSG00000024409,8	Psors1c2	protein_coding	1.69934	0.0206279
ENSMUSG00000025380,2	Fscn2	protein_coding	1.69899	0.0387319
ENSMUSG00000014778,6	Fhod1	protein_coding	1.69898	0.000112407
ENSMUSG00000049191,8	Rgag4	protein_coding	1.69781	0.0091449
ENSMUSG00000085828,1	Gm15612	processed_transcript	1.69772	0.0278932
ENSMUSG00000097003,1	D930007P13Rik	lincRNA	1.69732	0.0368244
ENSMUSG00000018893,10	Mb	protein_coding	1.69688	0.0321234
ENSMUSG00000051503,2	Gm6583	protein_coding	1.69663	0.0271914
ENSMUSG00000057963,5	Itpk1	protein_coding	1.69419	0.00294661
ENSMUSG00000029544,12	Cabp1	protein_coding	1.69379	0.0215691
ENSMUSG00000025422,8	Agap2	protein_coding	1.69236	4.59059e-05
ENSMUSG00000030873,8	Scnn1b	protein_coding	1.69199	0.00502922
ENSMUSG00000035238,4	Kcnk15	protein_coding	1.6908	0.0467005
ENSMUSG00000038451,9	Spsb2	protein_coding	1.69048	0.0282261
ENSMUSG00000073686,2	Gm10564	antisense	1.69042	0.0265433
ENSMUSG00000020357,3	Flt4	protein_coding	1.69027	1.64967e-05
ENSMUSG00000042644,8	Itpr3	protein_coding	1.69023	1.19965e-06
ENSMUSG00000100738,1	2010106C02Rik	antisense	1.68979	0.03748
ENSMUSG00000034993,7	Vat1	protein_coding	1.68939	0.00694219
ENSMUSG00000032590,10	Apeh	protein_coding	1.68915	0.000187821
ENSMUSG00000028071,8	Sh2d2a	protein_coding	1.68903	0.00337919
ENSMUSG00000033253,14	Szt2	protein_coding	1.68898	1.19965e-06
ENSMUSG00000032300,6	1700017B05Rik	protein_coding	1.68889	0.00719832
ENSMUSG00000018169,8	Mfng	protein_coding	1.68882	0.00209977
ENSMUSG00000050276,6	Mrgprg	protein_coding	1.68826	0.041319
ENSMUSG00000021866,11	Anxa11	protein_coding	1.68757	0.0186447
ENSMUSG00000030834,5	Abcc6	protein_coding	1.68706	0.000596289
ENSMUSG00000025507,9	Pidd1	protein_coding	1.68691	0.00467354
ENSMUSG00000031780,1	Ccl17	protein_coding	1.68573	0.0378851
ENSMUSG00000041617,6	Ccdc74a	protein_coding	1.68539	0.0177005
ENSMUSG00000045349,11	Sh2d5	protein_coding	1.68477	0.0168957
ENSMUSG00000070604,3	Vsig10l	protein_coding	1.68375	0.00228716
ENSMUSG00000019564,8	Arid3a	protein_coding	1.68344	0.000244136
ENSMUSG00000015850,7	Adamtsl4	protein_coding	1.68276	0.00430292
ENSMUSG00000039450,7	Dcxr	protein_coding	1.68187	0.031077
ENSMUSG00000020940,9	1700023F06Rik	protein_coding	1.68099	0.0277639
ENSMUSG00000071818,9	4930417O22Rik	antisense	1.68023	0.0285338
ENSMUSG00000062154,9	Tex33	protein_coding	1.68004	0.0221176
ENSMUSG00000006356,6	Crip2	protein_coding	1.67917	0.0122876
ENSMUSG00000044724,8	Gpr152	protein_coding	1.67913	0.00124596
ENSMUSG00000002831,9	Plin4	protein_coding	1.67899	0.00427157
ENSMUSG00000087408,5	Cers1	protein_coding	1.67819	0.00861497
ENSMUSG00000038390,9	Gpr162	protein_coding	1.67807	0.0123017
ENSMUSG00000024034,8	Tmprss3	protein_coding	1.67749	0.00679456
ENSMUSG00000034212,9	Ankmy1	protein_coding	1.67685	0.00272816
ENSMUSG00000040009,5	Gnaz	protein_coding	1.67657	0.00561102
ENSMUSG00000022540,12	Rogdi	protein_coding	1.67649	0.0384197
ENSMUSG00000020331,5	Hcn2	protein_coding	1.67641	0.00172877
ENSMUSG00000022560,8	Slc52a2	protein_coding	1.67636	0.0321149
ENSMUSG00000025229,11	Pitx3	protein_coding	1.67494	0.0219428
ENSMUSG00000032436,12	Cmtm7	protein_coding	1.67475	0.0223317
ENSMUSG00000026941,12	Mamdc4	protein_coding	1.67355	0.00139093
ENSMUSG00000029547,6	Ints1	protein_coding	1.67308	2.70665e-05
ENSMUSG00000097062,1	Gm17586	lincRNA	1.673	0.0271759
ENSMUSG00000026167,10	Wnt10a	protein_coding	1.67278	0.00299331
ENSMUSG00000052363,7	Zdhhc19	protein_coding	1.67127	0.0107115
ENSMUSG00000033295,9	Ptprf	protein_coding	1.67097	4.91775e-05
ENSMUSG00000039474,9	Wfs1	protein_coding	1.67075	0.00208152
ENSMUSG00000016349,10	Eef1a2	protein_coding	1.67071	0.0221915
ENSMUSG00000039523,12	Cep104	protein_coding	1.67041	0.000338888
ENSMUSG00000042918,11	Mamstr	protein_coding	1.67031	0.00446809
ENSMUSG00000073779,3	Lrp8os2	antisense	1.6701	0.0250392
ENSMUSG00000004815,8	Dgkq	protein_coding	1.67005	0.00113451
ENSMUSG00000030866,7	Ern2	protein_coding	1.66973	0.00246481
ENSMUSG00000004929,8	Thop1	protein_coding	1.66926	0.000683957
ENSMUSG00000074577,5	Fam65c	protein_coding	1.66785	0.00121134
ENSMUSG00000009145,4	Dqx1	protein_coding	1.6668	0.00719729
ENSMUSG00000047085,10	Lrrc4b	protein_coding	1.66677	0.0345806
ENSMUSG00000041199,2	Rpusd1	protein_coding	1.66589	0.023291
ENSMUSG00000037606,13	Osbpl5	protein_coding	1.66566	0.000130155
ENSMUSG00000022558,11	Mroh1	protein_coding	1.66456	5.05445e-06
ENSMUSG00000039158,11	Akna	protein_coding	1.66449	0.00120975
ENSMUSG00000082305,1	Gm2420	unprocessed_pseudogene	1.66422	0.000469077
ENSMUSG00000038545,9	Cul7	protein_coding	1.66379	5.56087e-06
ENSMUSG00000033508,6	Asprv1	protein_coding	1.66288	0.0487056
ENSMUSG00000046312,4	AI464131	protein_coding	1.66283	0.00738554
ENSMUSG00000024330,12	Col11a2	protein_coding	1.66276	4.87798e-06
ENSMUSG00000002625,9	Akap8l	protein_coding	1.66246	0.0130976
ENSMUSG00000021200,10	Asb2	protein_coding	1.66225	0.00423198
ENSMUSG00000022032,10	Scara5	protein_coding	1.66204	0.00400475
ENSMUSG00000047003,10	Zfp41	protein_coding	1.6615	0.0198578
ENSMUSG00000091475,2	2810468N07Rik	processed_transcript	1.66126	0.040617
ENSMUSG00000024891,5	Slc29a2	protein_coding	1.66078	0.000886048
ENSMUSG00000022610,9	Mapk12	protein_coding	1.66048	0.0196566
ENSMUSG00000058297,12	Spock2	protein_coding	1.66032	0.000370927
ENSMUSG00000035226,5	Rims4	protein_coding	1.66007	0.00486804
ENSMUSG00000053166,10	Cdh22	protein_coding	1.65948	0.00190372
ENSMUSG00000102461,1	RP24-421P3,7	TEC	1.65887	0.0121346
ENSMUSG00000036892,8	Prodh2	protein_coding	1.65863	0.00905887
ENSMUSG00000038292,12	Ccdc155	protein_coding	1.65741	0.00220709
ENSMUSG00000011589,8	Fsd1	protein_coding	1.65732	0.0277639
ENSMUSG00000022620,10	Arsa	protein_coding	1.65728	0.0070699
ENSMUSG00000064201,8	Krt2	protein_coding	1.65645	0.0146346
ENSMUSG00000028919,7	Arhgef19	protein_coding	1.65398	0.00104701
ENSMUSG00000023000,4	Dhh	protein_coding	1.65341	0.0339776
ENSMUSG00000025484,8	Bet1l	protein_coding	1.65317	0.0363708
ENSMUSG00000024011,12	Pi16	protein_coding	1.65309	0.00519826
ENSMUSG00000024818,10	Slc25a45	protein_coding	1.65306	0.0038172
ENSMUSG00000051043,12	Gprc5c	protein_coding	1.65049	0.00137975
ENSMUSG00000028923,10	Necap2	protein_coding	1.65042	0.0131716
ENSMUSG00000084845,5	Tmem240	protein_coding	1.65036	0.00284222
ENSMUSG00000031075,13	Ano1	protein_coding	1.65017	0.000322569
ENSMUSG00000024944,5	Arl2	protein_coding	1.64992	0.00717233
ENSMUSG00000040364,6	Sec1	protein_coding	1.64948	0.0410046
ENSMUSG00000032726,8	Bmp8a	protein_coding	1.64942	0.0277354
ENSMUSG00000068740,9	Celsr2	protein_coding	1.6492	2.70665e-05
ENSMUSG00000038060,11	Dlec1	protein_coding	1.64911	0.000149611
ENSMUSG00000061878,11	Sphk1	protein_coding	1.6491	0.00457532
ENSMUSG00000029026,12	Trp73	protein_coding	1.64868	0.00455146
ENSMUSG00000027580,13	Helz2	protein_coding	1.64802	7.73998e-05
ENSMUSG00000066191,7	Anks6	protein_coding	1.64795	0.0038358
ENSMUSG00000035403,8	Crb2	protein_coding	1.64784	0.000397783
ENSMUSG00000028943,13	Espn	protein_coding	1.64742	0.000455192
ENSMUSG00000078439,5	Smim24	protein_coding	1.64738	0.020002
ENSMUSG00000078531,3	Gm831	lincRNA	1.64734	0.00287518
ENSMUSG00000102856,1	RP23-122P5,3	TEC	1.6458	0.00166242
ENSMUSG00000030898,10	Cckbr	protein_coding	1.64577	0.0161939
ENSMUSG00000025223,10	Ldb1	protein_coding	1.64412	0.000202922
ENSMUSG00000059625,6	Sohlh1	protein_coding	1.6439	0.0445032
ENSMUSG00000034685,4	Fam171a2	protein_coding	1.64339	0.0117002
ENSMUSG00000035735,6	Dagla	protein_coding	1.64333	4.11995e-05
ENSMUSG00000002105,11	Slc39a13	protein_coding	1.6426	0.00121841
ENSMUSG00000034224,10	Slc38a8	protein_coding	1.64251	0.00152175
ENSMUSG00000032593,5	Amigo3	protein_coding	1.64179	0.0186486
ENSMUSG00000027489,11	Necab3	protein_coding	1.64152	0.017641
ENSMUSG00000042010,12	Acacb	protein_coding	1.64135	1.22245e-05
ENSMUSG00000028542,13	Slc6a9	protein_coding	1.6401	0.0037194
ENSMUSG00000037649,9	H2-DMa	protein_coding	1.63973	0.0438688
ENSMUSG00000048997,13	Atxn7l2	protein_coding	1.63899	0.0024781
ENSMUSG00000036026,11	Tmem63b	protein_coding	1.63889	0.00166242
ENSMUSG00000046556,6	Zfp319	protein_coding	1.63862	0.0022345
ENSMUSG00000035745,4	Grin3b	protein_coding	1.63802	0.00354038
ENSMUSG00000054520,11	Sh3bp2	protein_coding	1.6371	0.00115724
ENSMUSG00000022546,4	Gpt	protein_coding	1.63623	0.0456326
ENSMUSG00000047518,3	Slfnl1	protein_coding	1.63609	0.0329907
ENSMUSG00000020782,14	Llgl2	protein_coding	1.63601	0.000495498
ENSMUSG00000029797,8	Sspo	protein_coding	1.636	1.53613e-06
ENSMUSG00000073758,6	Sh3d21	protein_coding	1.63563	0.0138589
ENSMUSG00000025494,7	Sigirr	protein_coding	1.63561	0.0268414
ENSMUSG00000020723,3	Cacng4	protein_coding	1.63533	0.00778248
ENSMUSG00000034282,3	Evpl	protein_coding	1.63448	0.00021524
ENSMUSG00000044250,7	Pced1b	protein_coding	1.63357	0.0405645
ENSMUSG00000081965,1	Gm11620	processed_pseudogene	1.63351	0.0114976
ENSMUSG00000002981,9	Clptm1	protein_coding	1.6335	0.00700347
ENSMUSG00000010660,2	Plcd1	protein_coding	1.63232	0.00276541
ENSMUSG00000053559,8	Smagp	protein_coding	1.63229	0.0357398
ENSMUSG00000095134,2	Gm21857	unprocessed_pseudogene	1.6322	0.00218852
ENSMUSG00000067724,5	Gbx1	protein_coding	1.63202	0.00849531
ENSMUSG00000047443,10	Fam132b	protein_coding	1.63197	0.0136783
ENSMUSG00000056917,8	Sipa1	protein_coding	1.63179	0.000244136
ENSMUSG00000069227,4	Gprin1	protein_coding	1.631	0.0086219
ENSMUSG00000029047,9	Pex10	protein_coding	1.63092	0.00768853
ENSMUSG00000024173,10	Tpsab1	protein_coding	1.63076	0.0285699
ENSMUSG00000033597,8	Caskin1	protein_coding	1.62994	0.00131293
ENSMUSG00000024937,10	Ehbp1l1	protein_coding	1.62956	3.92005e-05
ENSMUSG00000010936,10	Vac14	protein_coding	1.6295	0.00021545
ENSMUSG00000103012,1	CH25-367I5,1	TEC	1.62949	0.0207359
ENSMUSG00000019066,9	Rab3d	protein_coding	1.62947	0.00104887
ENSMUSG00000020178,5	Adora2a	protein_coding	1.62826	0.0449173
ENSMUSG00000031028,9	Tub	protein_coding	1.62704	0.00404039
ENSMUSG00000050777,7	Tmem37	protein_coding	1.62688	0.024925
ENSMUSG00000021222,8	Dcaf4	protein_coding	1.62587	0.0131689
ENSMUSG00000028339,13	Col15a1	protein_coding	1.62529	0.000184553
ENSMUSG00000037095,7	Lrg1	protein_coding	1.62459	0.0313642
ENSMUSG00000025188,11	Hps1	protein_coding	1.62429	3.80076e-05
ENSMUSG00000024664,4	Fads3	protein_coding	1.62417	0.00021545
ENSMUSG00000033762,7	Recql4	protein_coding	1.62266	0.00757981
ENSMUSG00000043811,5	Rtn4r	protein_coding	1.62264	0.0472961
ENSMUSG00000020926,12	Adam11	protein_coding	1.62261	0.00019433
ENSMUSG00000029771,8	Irf5	protein_coding	1.62244	0.014995
ENSMUSG00000035852,6	Misp	protein_coding	1.62217	0.00603452
ENSMUSG00000004994,8	Ccdc130	protein_coding	1.62181	0.00949409
ENSMUSG00000020866,13	Cacna1g	protein_coding	1.6217	0.000139952
ENSMUSG00000000552,9	Zfp385a	protein_coding	1.62141	0.0218406
ENSMUSG00000086241,2	4930483K19Rik	antisense	1.6211	0.0475617
ENSMUSG00000090230,1	Gm16315	antisense	1.62047	0.032409
ENSMUSG00000020788,11	Atp2a3	protein_coding	1.62035	0.000495498
ENSMUSG00000000214,6	Th	protein_coding	1.62005	0.00202258
ENSMUSG00000049515,8	Espnl	protein_coding	1.61989	0.0029556
ENSMUSG00000029576,13	Radil	protein_coding	1.61974	0.00139409
ENSMUSG00000044469,7	Tnfaip8l1	protein_coding	1.61918	0.0348556
ENSMUSG00000063409,8	Lrrc43	protein_coding	1.6185	0.0173349
ENSMUSG00000094928,1	1700122O11Rik	protein_coding	1.61766	0.033462
ENSMUSG00000025212,12	Sfxn3	protein_coding	1.61625	0.00101416
ENSMUSG00000062753,9	AI413582	protein_coding	1.61619	0.0350149
ENSMUSG00000044216,6	Kcnj4	protein_coding	1.6158	0.00254694
ENSMUSG00000084939,2	Gm830	processed_transcript	1.61499	0.0323465
ENSMUSG00000004892,9	Bcan	protein_coding	1.61445	0.00298883
ENSMUSG00000070337,4	Gpr179	protein_coding	1.61378	1.18669e-05
ENSMUSG00000033327,12	Tnxb	protein_coding	1.61323	5.05445e-06
ENSMUSG00000040860,12	Crocc	protein_coding	1.6127	0.000239121
ENSMUSG00000024410,10	3110002H16Rik	protein_coding	1.61251	0.00141307
ENSMUSG00000041073,6	Nacad	protein_coding	1.61241	0.00387232
ENSMUSG00000039691,10	Tspan10	protein_coding	1.6118	0.0117909
ENSMUSG00000050675,7	Gp1ba	protein_coding	1.61166	0.0161698
ENSMUSG00000031827,8	Cotl1	protein_coding	1.61148	0.0389938
ENSMUSG00000040972,8	Igsf21	protein_coding	1.61135	0.0429481
ENSMUSG00000032316,7	Clk3	protein_coding	1.61134	0.0120162
ENSMUSG00000043102,2	Qrfp	protein_coding	1.6112	0.0282346
ENSMUSG00000043448,9	Gjc2	protein_coding	1.6102	0.0199838
ENSMUSG00000037989,11	Wnk2	protein_coding	1.60865	0.000193182
ENSMUSG00000038677,9	Scube3	protein_coding	1.60856	0.000238472
ENSMUSG00000024164,11	C3	protein_coding	1.60836	4.09953e-05
ENSMUSG00000042672,11	Dcst1	protein_coding	1.60828	0.0089963
ENSMUSG00000084226,1	Gm13426	processed_pseudogene	1.60706	0.0485858
ENSMUSG00000016933,13	Plcg1	protein_coding	1.6069	2.76836e-05
ENSMUSG00000003233,7	Dvl3	protein_coding	1.60555	0.00184686
ENSMUSG00000022517,12	Mgrn1	protein_coding	1.60489	0.00694664
ENSMUSG00000039452,5	Snx22	protein_coding	1.60483	0.0273435
ENSMUSG00000030495,8	Slc7a10	protein_coding	1.6046	0.0348944
ENSMUSG00000070331,9	Qrich2	protein_coding	1.6044	0.011563
ENSMUSG00000031785,11	Gpr56	protein_coding	1.60371	0.00171925
ENSMUSG00000036138,12	Acaa1a	protein_coding	1.60311	0.00227939
ENSMUSG00000032105,4	Pdzd3	protein_coding	1.60249	0.0130381
ENSMUSG00000000791,8	Il12rb1	protein_coding	1.60207	0.00282877
ENSMUSG00000058740,10	Kcnt1	protein_coding	1.60172	0.000108733
ENSMUSG00000047181,8	Samd14	protein_coding	1.60155	0.00594673
ENSMUSG00000009075,2	Cabp7	protein_coding	1.60119	0.0220973
ENSMUSG00000024206,10	Rfx2	protein_coding	1.60039	0.00236965
ENSMUSG00000030341,13	Tnfrsf1a	protein_coding	1.59941	0.00750007
ENSMUSG00000036106,11	Prr5	protein_coding	1.59909	0.0441805
ENSMUSG00000020329,8	Polrmt	protein_coding	1.59854	0.0026612
ENSMUSG00000032733,5	Snx33	protein_coding	1.59779	0.00454221
ENSMUSG00000032661,8	Oas3	protein_coding	1.59701	0.0066258
ENSMUSG00000061740,7	Cyp2d22	protein_coding	1.59679	0.0151629
ENSMUSG00000002486,11	Tchp	protein_coding	1.59627	0.000268929
ENSMUSG00000085713,1	Gm15736	lincRNA	1.59617	0.0100311
ENSMUSG00000051375,11	Pcdh1	protein_coding	1.59594	0.00325529
ENSMUSG00000025165,8	Sectm1a	protein_coding	1.59589	0.036556
ENSMUSG00000016253,8	Nelfcd	protein_coding	1.59542	0.0086036
ENSMUSG00000037428,10	Vgf	protein_coding	1.59417	0.00370828
ENSMUSG00000027217,9	Tspan18	protein_coding	1.59359	0.000176415
ENSMUSG00000085338,1	2410004I01Rik	lincRNA	1.59253	0.0299692
ENSMUSG00000028857,12	Tmem222	protein_coding	1.5918	0.0209836
ENSMUSG00000028737,11	Aldh4a1	protein_coding	1.59158	0.0121325
ENSMUSG00000029053,12	Prkcz	protein_coding	1.59148	0.00139409
ENSMUSG00000028635,7	Edn2	protein_coding	1.59126	0.0427731
ENSMUSG00000024777,9	Ppp2r5b	protein_coding	1.5911	0.00246481
ENSMUSG00000078253,3	Krtap16-1	protein_coding	1.59011	0.01079
ENSMUSG00000010066,11	Cacna2d2	protein_coding	1.58974	0.000322878
ENSMUSG00000039936,14	Pik3cd	protein_coding	1.58752	4.66733e-05
ENSMUSG00000020792,11	Exoc7	protein_coding	1.5874	0.000117877
ENSMUSG00000023971,8	Rrp36	protein_coding	1.58613	0.0187776
ENSMUSG00000102018,2	K230010J24Rik	protein_coding	1.58501	0.0110419
ENSMUSG00000033871,10	Ppargc1b	protein_coding	1.58372	0.00295325
ENSMUSG00000025318,9	Jph3	protein_coding	1.58366	0.000505401
ENSMUSG00000031074,10	Fgf3	protein_coding	1.5829	0.0359877
ENSMUSG00000031809,6	1700018B08Rik	protein_coding	1.58251	0.0120127
ENSMUSG00000018217,8	Pmp22	protein_coding	1.58009	0.0303098
ENSMUSG00000047810,8	Ccdc88b	protein_coding	1.58002	0.000175592
ENSMUSG00000047641,7	Krt83	protein_coding	1.57988	0.0232963
ENSMUSG00000049265,6	Kcnk3	protein_coding	1.57955	0.0321733
ENSMUSG00000070570,4	Slc17a7	protein_coding	1.57922	0.023
ENSMUSG00000045075,3	Gm9796	lincRNA	1.57916	0.0388203
ENSMUSG00000038792,3	4931403M11Rik	lincRNA	1.57887	0.0179724
ENSMUSG00000104213,1	Ighd	IG_C_gene	1.57855	0.0419822
ENSMUSG00000023978,5	Prph2	protein_coding	1.57832	0.0199249
ENSMUSG00000034427,12	Myo15b	protein_coding	1.57807	3.13181e-05
ENSMUSG00000028920,9	Fbxo42	protein_coding	1.57804	0.00205242
ENSMUSG00000061589,10	Dot1l	protein_coding	1.5777	0.000136388
ENSMUSG00000018486,2	Wnt9b	protein_coding	1.57733	0.00150752
ENSMUSG00000030089,11	Slc41a3	protein_coding	1.57685	0.0232018
ENSMUSG00000024906,5	Mus81	protein_coding	1.57652	0.000814421
ENSMUSG00000051007,10	Pddc1	protein_coding	1.57626	0.0148108
ENSMUSG00000026965,8	Anapc2	protein_coding	1.57625	0.00146668
ENSMUSG00000016942,5	Tmprss6	protein_coding	1.57546	0.0171906
ENSMUSG00000040964,12	Arhgef10l	protein_coding	1.57542	8.48063e-05
ENSMUSG00000017670,12	Elmo2	protein_coding	1.57529	0.000455192
ENSMUSG00000028469,11	Npr2	protein_coding	1.57512	0.0111388
ENSMUSG00000035486,10	Plk5	protein_coding	1.57484	0.0201059
ENSMUSG00000071202,4	Ccdc78	protein_coding	1.57461	0.0132891
ENSMUSG00000028854,9	Slc9a1	protein_coding	1.5746	0.000559686
ENSMUSG00000053046,10	Brsk2	protein_coding	1.57458	0.000505038
ENSMUSG00000042570,10	Mier2	protein_coding	1.57452	0.00218929
ENSMUSG00000035673,9	Sbno2	protein_coding	1.57408	0.000621607
ENSMUSG00000019467,9	Arhgef25	protein_coding	1.57407	0.00283481
ENSMUSG00000003546,9	Klc4	protein_coding	1.57385	0.00674386
ENSMUSG00000025701,8	Alox5	protein_coding	1.57219	0.00744643
ENSMUSG00000001576,10	Ergic1	protein_coding	1.57177	0.000758492
ENSMUSG00000030741,11	Spns1	protein_coding	1.57143	0.0192947
ENSMUSG00000040740,7	Slc25a34	protein_coding	1.57086	0.0399887
ENSMUSG00000044017,12	Gpr133	protein_coding	1.57062	4.60821e-05
ENSMUSG00000057897,10	Camk2b	protein_coding	1.56966	0.000128058
ENSMUSG00000070304,7	Scn2b	protein_coding	1.56888	0.00791797
ENSMUSG00000001493,9	Meox1	protein_coding	1.56872	0.0271759
ENSMUSG00000100691,1	2010320M18Rik	lincRNA	1.56869	0.0334283
ENSMUSG00000031821,7	Gins2	protein_coding	1.56848	0.0139971
ENSMUSG00000005045,12	Chd5	protein_coding	1.56847	7.22632e-05
ENSMUSG00000022999,10	Lmbr1l	protein_coding	1.56746	0.00293953
ENSMUSG00000042759,8	Apobr	protein_coding	1.56655	0.00565672
ENSMUSG00000032783,8	Troap	protein_coding	1.5659	0.013824
ENSMUSG00000026853,11	Crat	protein_coding	1.56569	0.00319855
ENSMUSG00000028753,8	Vwa5b1	protein_coding	1.56509	0.000334067
ENSMUSG00000024124,5	Prss30	protein_coding	1.56409	0.0209557
ENSMUSG00000006369,10	Fbln1	protein_coding	1.56362	0.0117647
ENSMUSG00000075046,5	4933403O03Rik	unprocessed_pseudogene	1.563	2.01591e-05
ENSMUSG00000028115,12	Bnipl	protein_coding	1.56233	0.0124676
ENSMUSG00000049897,10	Stkld1	protein_coding	1.56137	0.0268414
ENSMUSG00000029196,9	Tada2b	protein_coding	1.56112	0.00445992
ENSMUSG00000041117,8	Ccdc8	protein_coding	1.56037	0.00801831
ENSMUSG00000024112,12	Cacna1h	protein_coding	1.56023	0.000188993
ENSMUSG00000074575,4	Kcng1	protein_coding	1.56012	0.0119421
ENSMUSG00000023809,9	Rps6ka2	protein_coding	1.56	0.00191238
ENSMUSG00000024039,10	Cbs	protein_coding	1.55968	0.0026612
ENSMUSG00000061111,8	Fam195b	protein_coding	1.55947	0.0313924
ENSMUSG00000030683,7	Sez6l2	protein_coding	1.55931	0.014109
ENSMUSG00000061577,7	Gpr114	protein_coding	1.5593	0.00374061
ENSMUSG00000029570,1	Lfng	protein_coding	1.55786	0.0375896
ENSMUSG00000004231,11	Pax2	protein_coding	1.55774	7.22632e-05
ENSMUSG00000036636,5	Clcn7	protein_coding	1.55702	0.00020743
ENSMUSG00000039781,10	Cep131	protein_coding	1.55613	0.000857951
ENSMUSG00000085028,2	Slc2a4rg-ps	unitary_pseudogene	1.55441	0.0291954
ENSMUSG00000005952,11	Trpv1	protein_coding	1.55437	0.00725009
ENSMUSG00000060950,7	Trmt61a	protein_coding	1.55423	0.0144783
ENSMUSG00000050854,5	Tmem125	protein_coding	1.55396	0.0315486
ENSMUSG00000049295,12	Zfp219	protein_coding	1.55382	0.0297616
ENSMUSG00000034807,8	Colgalt1	protein_coding	1.55313	0.00229082
ENSMUSG00000014444,12	Piezo1	protein_coding	1.55305	1.67523e-05
ENSMUSG00000037686,5	Aspg	protein_coding	1.55237	0.00896663
ENSMUSG00000071341,3	Egr4	protein_coding	1.55195	0.0372053
ENSMUSG00000074406,4	Zfp628	protein_coding	1.55101	0.00361381
ENSMUSG00000052336,6	Cx3cr1	protein_coding	1.55086	0.0127465
ENSMUSG00000029103,12	Lrpap1	protein_coding	1.55045	0.00896773
ENSMUSG00000006587,5	Snai3	protein_coding	1.55043	0.0467885
ENSMUSG00000001082,8	Mfsd10	protein_coding	1.55015	0.00710912
ENSMUSG00000028862,6	Map3k6	protein_coding	1.54995	0.0026612
ENSMUSG00000062859,10	Tcp11	protein_coding	1.54981	0.0093231
ENSMUSG00000063646,9	Jakmip1	protein_coding	1.54967	0.000336099
ENSMUSG00000000202,5	Btbd17	protein_coding	1.54942	0.0108004
ENSMUSG00000024013,10	Fgd2	protein_coding	1.54883	0.0094888
ENSMUSG00000020437,8	Myo1g	protein_coding	1.54854	0.00013263
ENSMUSG00000074647,3	Fam83c	protein_coding	1.54789	0.0108954
ENSMUSG00000032834,10	Pwp2	protein_coding	1.54729	0.000564152
ENSMUSG00000033763,10	Mtss1l	protein_coding	1.54725	0.000134743
ENSMUSG00000029594,9	Rbm19	protein_coding	1.54709	0.00186662
ENSMUSG00000006398,11	Cdc20	protein_coding	1.54705	0.0294522
ENSMUSG00000085836,1	Gm13074	lincRNA	1.54686	0.0377999
ENSMUSG00000024485,11	Slc4a9	protein_coding	1.54656	0.0132141
ENSMUSG00000068745,5	Mybphl	protein_coding	1.54647	0.0200651
ENSMUSG00000017737,2	Mmp9	protein_coding	1.54644	0.00156613
ENSMUSG00000019178,13	Styxl1	protein_coding	1.54428	0.00344813
ENSMUSG00000021464,10	Ror2	protein_coding	1.54378	0.01324
ENSMUSG00000020902,8	Ntn1	protein_coding	1.54354	0.00212217
ENSMUSG00000100781,1	Gm29481	antisense	1.54293	0.0387319
ENSMUSG00000020732,9	Rab37	protein_coding	1.54291	0.00228595
ENSMUSG00000024620,7	Pdgfrb	protein_coding	1.5429	0.00549552
ENSMUSG00000006362,11	Cbfa2t3	protein_coding	1.54227	0.00013263
ENSMUSG00000056228,9	Cars2	protein_coding	1.54204	0.00750007
ENSMUSG00000006307,12	Kmt2b	protein_coding	1.54202	0.000115819
ENSMUSG00000045980,9	Tmem104	protein_coding	1.54059	0.00147716
ENSMUSG00000072214,6	Sept5	protein_coding	1.53995	0.0195242
ENSMUSG00000039410,12	Prdm16	protein_coding	1.53904	0.00012968
ENSMUSG00000063065,9	Mapk3	protein_coding	1.53754	0.0105383
ENSMUSG00000001053,11	N4bp3	protein_coding	1.53674	0.00615741
ENSMUSG00000040631,7	Dok4	protein_coding	1.53631	0.0215467
ENSMUSG00000062115,11	Rai1	protein_coding	1.53605	0.000136388
ENSMUSG00000049908,5	Gja8	protein_coding	1.53593	0.0309911
ENSMUSG00000031872,9	Bean1	protein_coding	1.53384	0.00938837
ENSMUSG00000071540,3	3425401B19Rik	protein_coding	1.53367	0.00576998
ENSMUSG00000058301,6	Upf1	protein_coding	1.53367	0.000215023
ENSMUSG00000039021,11	Ttc16	protein_coding	1.53308	0.00114658
ENSMUSG00000097767,4	Miat	lincRNA	1.53267	0.000225532
ENSMUSG00000038828,9	Tmem214	protein_coding	1.53233	0.00166242
ENSMUSG00000042594,12	Sh2b3	protein_coding	1.53136	0.00688848
ENSMUSG00000033768,12	Nrxn2	protein_coding	1.5311	1.8027e-05
ENSMUSG00000025213,7	Kazald1	protein_coding	1.53018	0.0173422
ENSMUSG00000034227,7	Foxj1	protein_coding	1.52947	0.0476342
ENSMUSG00000097559,1	D430018E03Rik	lincRNA	1.52904	0.00953781
ENSMUSG00000022623,11	Shank3	protein_coding	1.52857	0.00369629
ENSMUSG00000029055,13	Plch2	protein_coding	1.528	0.000465298
ENSMUSG00000002791,12	Pdxk-ps	transcribed_unprocessed_pseudogene	1.52782	0.00326603
ENSMUSG00000038453,11	Srcin1	protein_coding	1.5276	0.000112407
ENSMUSG00000072812,4	Ahnak2	protein_coding	1.52746	0.000339738
ENSMUSG00000028631,7	Kcnq4	protein_coding	1.52741	0.0109084
ENSMUSG00000101940,1	Akp-ps1	unprocessed_pseudogene	1.52734	0.0328955
ENSMUSG00000044534,7	Ackr2	protein_coding	1.52672	0.00729964
ENSMUSG00000038930,7	Rccd1	protein_coding	1.52645	0.0245931
ENSMUSG00000004415,11	Col26a1	protein_coding	1.52645	0.000898277
ENSMUSG00000034245,6	Hdac11	protein_coding	1.52593	0.00913982
ENSMUSG00000035944,13	Ttc38	protein_coding	1.52589	0.0187907
ENSMUSG00000070683,7	Lactbl1	protein_coding	1.52565	0.0105645
ENSMUSG00000018740,10	Slc25a35	protein_coding	1.52464	0.0095325
ENSMUSG00000017478,11	Zc3h18	protein_coding	1.52457	1.07691e-05
ENSMUSG00000028978,8	Nos3	protein_coding	1.52394	0.00163862
ENSMUSG00000001095,5	Slc13a2	protein_coding	1.52371	0.00527595
ENSMUSG00000086390,3	1810019D21Rik	processed_transcript	1.52319	0.00795027
ENSMUSG00000029716,9	Tfr2	protein_coding	1.5229	0.0127465
ENSMUSG00000034854,8	Mfsd12	protein_coding	1.52269	0.013856
ENSMUSG00000059901,8	Adamts14	protein_coding	1.52203	0.00016785
ENSMUSG00000032175,10	Tyk2	protein_coding	1.52148	0.00166242
ENSMUSG00000002496,9	Tsc2	protein_coding	1.52083	0.000475673
ENSMUSG00000003402,9	Prkcsh	protein_coding	1.52054	0.00433355
ENSMUSG00000040220,9	Gas8	protein_coding	1.52041	0.00134913
ENSMUSG00000050473,4	Slc35d3	protein_coding	1.51922	0.0379537
ENSMUSG00000050468,8	Astl	protein_coding	1.51915	0.0126796
ENSMUSG00000040345,9	Arhgap9	protein_coding	1.51899	0.0283128
ENSMUSG00000090588,2	Gm9573	protein_coding	1.51805	0.00254914
ENSMUSG00000034145,10	Tmem63c	protein_coding	1.51754	0.000282203
ENSMUSG00000074818,8	Pdzd7	protein_coding	1.51737	0.000130175
ENSMUSG00000030324,6	Rho	protein_coding	1.51643	0.0353958
ENSMUSG00000102144,1	RP23-115A1,12	lincRNA	1.51627	0.0228906
ENSMUSG00000068227,4	Il2rb	protein_coding	1.51569	0.00623041
ENSMUSG00000004043,10	Stat5a	protein_coding	1.51524	0.00190022
ENSMUSG00000026407,13	Cacna1s	protein_coding	1.51357	0.000108384
ENSMUSG00000039911,9	Spsb1	protein_coding	1.51318	0.0171714
ENSMUSG00000025127,11	Gcgr	protein_coding	1.51274	0.0382946
ENSMUSG00000023267,6	Gabrr2	protein_coding	1.51252	0.0224584
ENSMUSG00000026237,3	Nmur1	protein_coding	1.51214	0.0206691
ENSMUSG00000000753,11	Serpinf1	protein_coding	1.51185	0.0240594
ENSMUSG00000024743,10	Syt7	protein_coding	1.5113	0.000393323
ENSMUSG00000043085,10	Tmem82	protein_coding	1.51122	0.016563
ENSMUSG00000024790,7	Sac3d1	protein_coding	1.51115	0.0344277
ENSMUSG00000034837,8	Gnat1	protein_coding	1.51114	0.0187776
ENSMUSG00000020722,5	Cacng1	protein_coding	1.51106	0.0250392
ENSMUSG00000037995,11	Igsf9	protein_coding	1.51069	0.000846249
ENSMUSG00000034799,12	Unc13a	protein_coding	1.51052	3.73163e-05
ENSMUSG00000079235,6	Ccdc13	protein_coding	1.51006	0.00924998
ENSMUSG00000053334,5	Ficd	protein_coding	1.50946	0.0105368
ENSMUSG00000020684,10	Rasl10b	protein_coding	1.50936	0.00782271
ENSMUSG00000001901,11	Kcnh6	protein_coding	1.50856	0.00532689
ENSMUSG00000072423,4	Psmb11	protein_coding	1.50829	0.0205951
ENSMUSG00000022550,13	Adck5	protein_coding	1.50792	0.0169455
ENSMUSG00000028581,13	Laptm5	protein_coding	1.50679	0.00911262
ENSMUSG00000042115,4	Klhdc8a	protein_coding	1.50641	0.00587899
ENSMUSG00000046338,4	Gpat2	protein_coding	1.50611	0.0176486
ENSMUSG00000027230,9	Creb3l1	protein_coding	1.50497	0.0181407
ENSMUSG00000059213,6	Ddn	protein_coding	1.50406	0.0323465
ENSMUSG00000029359,9	Tesc	protein_coding	1.50391	0.0193749
ENSMUSG00000040249,11	Lrp1	protein_coding	1.50334	5.95115e-05
ENSMUSG00000022436,11	Sh3bp1	protein_coding	1.50264	0.000122821
ENSMUSG00000044177,4	Wfikkn2	protein_coding	1.50205	0.0107228
ENSMUSG00000047492,4	Inhbe	protein_coding	1.50174	0.0200959
ENSMUSG00000029098,12	Acox3	protein_coding	1.50123	0.000137945
ENSMUSG00000045045,7	Lrfn4	protein_coding	1.50112	0.00147779
ENSMUSG00000005640,7	Insrr	protein_coding	1.50094	0.000843942
ENSMUSG00000034117,3	Ptgdr2	protein_coding	1.50086	0.0148108
ENSMUSG00000000244,12	Tspan32	protein_coding	1.49998	0.0204859
ENSMUSG00000035206,9	Sppl2b	protein_coding	1.49918	0.0100154
ENSMUSG00000035228,10	Ccdc106	protein_coding	1.499	0.0282261
ENSMUSG00000085336,1	Gm11732	processed_transcript	1.49836	0.0237179
ENSMUSG00000036882,6	Arhgap33	protein_coding	1.49708	0.0027838
ENSMUSG00000031375,13	Bgn	protein_coding	1.49698	0.0117909
ENSMUSG00000031861,11	Lpar2	protein_coding	1.49476	0.0038358
ENSMUSG00000024833,10	Pola2	protein_coding	1.49444	0.000711652
ENSMUSG00000071068,6	Treml2	protein_coding	1.49441	0.00187398
ENSMUSG00000040471,13	Ggt6	protein_coding	1.49408	0.0352391
ENSMUSG00000002379,6	Ndufa11	protein_coding	1.4937	0.0168957
ENSMUSG00000016510,7	Mtif3	protein_coding	1.4937	0.00379053
ENSMUSG00000000782,11	Tcf7	protein_coding	1.49352	0.032196
ENSMUSG00000053646,9	Plxnb1	protein_coding	1.49304	1.51183e-05
ENSMUSG00000079243,2	Xirp1	protein_coding	1.49271	0.00924998
ENSMUSG00000029703,6	Lrwd1	protein_coding	1.49228	0.00016781
ENSMUSG00000028745,14	Capzb	protein_coding	1.49159	0.00163436
ENSMUSG00000030350,8	Prmt8	protein_coding	1.49155	0.0262029
ENSMUSG00000003420,7	Fcgrt	protein_coding	1.48919	0.0197076
ENSMUSG00000058099,11	Nfam1	protein_coding	1.48873	0.0118869
ENSMUSG00000031898,8	Dpep3	protein_coding	1.48821	0.0355424
ENSMUSG00000026452,11	Syt2	protein_coding	1.48782	0.000199363
ENSMUSG00000002799,5	Jag2	protein_coding	1.48703	0.00518426
ENSMUSG00000058153,10	Sez6l	protein_coding	1.48697	0.000243483
ENSMUSG00000047730,13	Fcgbp	protein_coding	1.48659	0.000688918
ENSMUSG00000004558,10	Ndrg2	protein_coding	1.48628	0.0327366
ENSMUSG00000050445,4	Cyp8b1	protein_coding	1.48624	0.0298334
ENSMUSG00000023143,6	Nagpa	protein_coding	1.48533	0.0337939
ENSMUSG00000094910,1	D430019H16Rik	protein_coding	1.4839	0.00446809
ENSMUSG00000028455,11	Stoml2	protein_coding	1.48328	0.0311441
ENSMUSG00000027463,10	Slc52a3	protein_coding	1.48253	0.0144419
ENSMUSG00000050382,10	Kif7	protein_coding	1.48251	0.0104873
ENSMUSG00000038980,1	Rbbp8nl	protein_coding	1.4824	0.0097399
ENSMUSG00000023007,11	Prpf40b	protein_coding	1.48165	0.000694675
ENSMUSG00000047415,7	Gpr68	protein_coding	1.47965	0.0200922
ENSMUSG00000032584,8	Mst1r	protein_coding	1.47924	0.00317632
ENSMUSG00000031706,6	Rfx1	protein_coding	1.47924	0.00406348
ENSMUSG00000038695,8	Josd2	protein_coding	1.47893	0.0399151
ENSMUSG00000031828,8	Klhl36	protein_coding	1.47892	0.0169291
ENSMUSG00000044496,6	2510039O18Rik	protein_coding	1.4788	0.0122179
ENSMUSG00000044041,4	Krt13	protein_coding	1.47845	0.0422455
ENSMUSG00000021203,11	Otub2	protein_coding	1.47825	0.00762657
ENSMUSG00000034863,7	Ano8	protein_coding	1.47792	0.00549113
ENSMUSG00000018822,7	Sfrp5	protein_coding	1.47751	0.0289915
ENSMUSG00000022555,7	Dgat1	protein_coding	1.4772	0.0387998
ENSMUSG00000057948,8	Unc13d	protein_coding	1.47672	0.000688918
ENSMUSG00000010080,11	Epn3	protein_coding	1.47555	0.00109814
ENSMUSG00000042784,5	Muc1	protein_coding	1.47487	0.0171714
ENSMUSG00000044254,6	Pcsk9	protein_coding	1.47466	0.0124673
ENSMUSG00000056185,4	Snx32	protein_coding	1.47444	0.00991724
ENSMUSG00000025877,10	Hk3	protein_coding	1.47376	0.00404405
ENSMUSG00000028670,10	Lypla2	protein_coding	1.47326	0.0225597
ENSMUSG00000061650,6	Med9	protein_coding	1.4729	0.0469708
ENSMUSG00000029624,10	Ptcd1	protein_coding	1.47276	0.0118862
ENSMUSG00000056724,10	Nbeal2	protein_coding	1.47259	8.76358e-05
ENSMUSG00000083722,1	Gpr144-ps	transcribed_unprocessed_pseudogene	1.47223	0.0282217
ENSMUSG00000024220,9	Zfp523	protein_coding	1.471	0.0135674
ENSMUSG00000025082,8	Vwa2	protein_coding	1.47098	0.00163057
ENSMUSG00000014609,12	Chrne	protein_coding	1.46997	0.0404314
ENSMUSG00000027577,10	Chrna4	protein_coding	1.46965	0.00368679
ENSMUSG00000097000,1	Gm17435	lincRNA	1.46923	0.0250194
ENSMUSG00000030693,9	Klk10	protein_coding	1.46912	0.0413932
ENSMUSG00000002803,9	Btbd6	protein_coding	1.46779	0.0239557
ENSMUSG00000028973,14	Abcb8	protein_coding	1.46768	0.00282846
ENSMUSG00000022245,11	Skor1	protein_coding	1.46764	0.0116927
ENSMUSG00000037451,7	Slc22a20	protein_coding	1.46752	0.00271921
ENSMUSG00000024101,10	Wash	protein_coding	1.46713	0.0129592
ENSMUSG00000041936,14	Agrn	protein_coding	1.46678	0.00102938
ENSMUSG00000020101,10	4632428N05Rik	protein_coding	1.46672	0.00953531
ENSMUSG00000043286,7	Pnpla1	protein_coding	1.4667	0.00540669
ENSMUSG00000037003,11	Tenc1	protein_coding	1.46669	0.00293953
ENSMUSG00000086003,3	B230206L02Rik	processed_transcript	1.46651	0.0371314
ENSMUSG00000094973,1	Gm8994	protein_coding	1.4655	0.0166681
ENSMUSG00000039110,10	Mycbpap	protein_coding	1.46542	0.00266127
ENSMUSG00000018334,12	Ksr1	protein_coding	1.46465	0.000429634
ENSMUSG00000030269,10	Mtmr14	protein_coding	1.46462	0.00281568
ENSMUSG00000040154,7	Wfdc5	protein_coding	1.46414	0.0422455
ENSMUSG00000040752,11	Myh6	protein_coding	1.46341	0.00021524
ENSMUSG00000041187,12	Prkd2	protein_coding	1.46301	0.00147779
ENSMUSG00000002372,8	Ranbp3	protein_coding	1.46206	0.0176608
ENSMUSG00000029029,10	Wrap73	protein_coding	1.46201	0.0260321
ENSMUSG00000071074,5	Yipf3	protein_coding	1.46174	0.015712
ENSMUSG00000032492,10	Pth1r	protein_coding	1.46141	0.0248836
ENSMUSG00000079445,3	B3gnt7	protein_coding	1.46131	0.0348556
ENSMUSG00000055003,10	Lrtm2	protein_coding	1.46069	0.0238258
ENSMUSG00000020798,10	Spns3	protein_coding	1.46025	0.00368918
ENSMUSG00000033987,11	Dnah17	protein_coding	1.45953	4.10025e-05
ENSMUSG00000002324,7	Rec8	protein_coding	1.45951	0.0359545
ENSMUSG00000045903,8	Npas4	protein_coding	1.4583	0.000732864
ENSMUSG00000033128,8	Gga1	protein_coding	1.45825	0.000310635
ENSMUSG00000030731,9	Syt3	protein_coding	1.45817	0.0131399
ENSMUSG00000029001,11	Fbxo44	protein_coding	1.45716	0.0425847
ENSMUSG00000034371,8	Dak	protein_coding	1.45714	0.0142858
ENSMUSG00000071054,8	Safb	protein_coding	1.45684	0.000392191
ENSMUSG00000070002,6	Ell	protein_coding	1.45681	0.00802818
ENSMUSG00000104114,1	RP23-102K8,1	TEC	1.45678	0.0466366
ENSMUSG00000039686,10	Zer1	protein_coding	1.45659	0.000501182
ENSMUSG00000023433,8	Cela3b	protein_coding	1.45647	0.0433001
ENSMUSG00000025579,10	Gaa	protein_coding	1.45584	0.00243123
ENSMUSG00000027636,7	Sla2	protein_coding	1.45532	0.0320354
ENSMUSG00000087687,2	Pet100	protein_coding	1.45481	0.0464027
ENSMUSG00000057751,10	Megf6	protein_coding	1.4545	0.000347298
ENSMUSG00000000532,10	Acvr1b	protein_coding	1.45427	0.0192669
ENSMUSG00000042675,11	Ypel3	protein_coding	1.45415	0.0482807
ENSMUSG00000036555,10	Iqce	protein_coding	1.45368	4.59059e-05
ENSMUSG00000040441,8	Slc26a10	protein_coding	1.45362	0.0107705
ENSMUSG00000017344,4	Vtn	protein_coding	1.45352	0.0427829
ENSMUSG00000024137,8	E4f1	protein_coding	1.45299	0.0221001
ENSMUSG00000020198,7	Ap3d1	protein_coding	1.45252	0.000244136
ENSMUSG00000038542,10	Pcid2	protein_coding	1.45204	0.00468812
ENSMUSG00000070576,4	Mn1	protein_coding	1.4516	0.00382078
ENSMUSG00000039254,12	Pomt1	protein_coding	1.45155	0.0017752
ENSMUSG00000028969,6	Cdk5	protein_coding	1.45017	0.016624
ENSMUSG00000034308,9	Sdr42e1	protein_coding	1.4498	0.0222368
ENSMUSG00000097899,2	Gm16894	antisense	1.44941	0.0472961
ENSMUSG00000002908,11	Kcnn1	protein_coding	1.44904	0.00605577
ENSMUSG00000040447,11	Spns2	protein_coding	1.44828	0.00134378
ENSMUSG00000033717,5	Adra2a	protein_coding	1.44817	0.0115227
ENSMUSG00000028931,7	Kcnab2	protein_coding	1.44812	0.00393107
ENSMUSG00000029712,10	Actl6b	protein_coding	1.44733	0.0177494
ENSMUSG00000045664,4	Cdc42ep2	protein_coding	1.44713	0.0384197
ENSMUSG00000096847,1	Tmem151b	protein_coding	1.44668	0.00746509
ENSMUSG00000025485,8	Ric8	protein_coding	1.44655	0.0137768
ENSMUSG00000026223,11	Itm2c	protein_coding	1.44603	0.00976286
ENSMUSG00000040606,9	Kazn	protein_coding	1.4456	0.00148675
ENSMUSG00000061451,9	Tmem151a	protein_coding	1.44544	0.000306825
ENSMUSG00000047841,8	BC051628	protein_coding	1.44543	0.0499183
ENSMUSG00000031766,3	Slc12a3	protein_coding	1.44484	0.000772701
ENSMUSG00000043822,14	Adamtsl5	protein_coding	1.44479	0.0032152
ENSMUSG00000002885,10	Cd97	protein_coding	1.44417	0.0200922
ENSMUSG00000031883,8	Car7	protein_coding	1.44367	0.0339744
ENSMUSG00000020806,11	Rhbdf2	protein_coding	1.44321	0.00325244
ENSMUSG00000026817,10	Ak1	protein_coding	1.44293	0.0348556
ENSMUSG00000024922,1	Ovol1	protein_coding	1.44287	0.00783987
ENSMUSG00000029151,10	Slc30a3	protein_coding	1.44272	0.031334
ENSMUSG00000040327,12	Cul9	protein_coding	1.44247	0.000136388
ENSMUSG00000034793,11	G6pc3	protein_coding	1.44176	0.0242827
ENSMUSG00000025207,11	Sema4g	protein_coding	1.44101	0.00224694
ENSMUSG00000066058,7	Cldn19	protein_coding	1.43972	0.0086036
ENSMUSG00000097816,1	Gm26811	lincRNA	1.43776	0.0335066
ENSMUSG00000066108,7	Muc5b	protein_coding	1.4371	5.47393e-05
ENSMUSG00000051169,10	Rpusd3	protein_coding	1.43625	0.0436674
ENSMUSG00000033365,10	Ipo13	protein_coding	1.43619	0.00214636
ENSMUSG00000015451,12	C4a	processed_transcript	1.4357	0.000344581
ENSMUSG00000035547,10	Capn5	protein_coding	1.43558	0.00372369
ENSMUSG00000002020,11	Ltbp2	protein_coding	1.43538	0.000212374
ENSMUSG00000058537,3	AW822073	protein_coding	1.43503	6.47617e-05
ENSMUSG00000026387,11	Sctr	protein_coding	1.43465	0.00932491
ENSMUSG00000091311,2	Spata31d1b	protein_coding	1.4345	0.0490074
ENSMUSG00000096950,2	Gm9530	lincRNA	1.4341	0.0130349
ENSMUSG00000020284,12	1810043G02Rik	protein_coding	1.43407	0.00109469
ENSMUSG00000018387,8	Shroom1	protein_coding	1.43395	0.0233068
ENSMUSG00000055632,13	Hmcn2	protein_coding	1.43337	8.27127e-05
ENSMUSG00000009614,12	Sardh	protein_coding	1.43316	0.00997632
ENSMUSG00000070645,5	Ren1	protein_coding	1.43308	0.0328367
ENSMUSG00000067642,7	Gpr113	protein_coding	1.43266	0.00550903
ENSMUSG00000019055,11	Plod1	protein_coding	1.4326	0.00249429
ENSMUSG00000042671,8	Rgs8	protein_coding	1.43137	0.000128617
ENSMUSG00000087291,1	Gm11946	processed_transcript	1.43098	0.0255813
ENSMUSG00000034958,7	Atcay	protein_coding	1.43068	0.0116976
ENSMUSG00000097233,1	Gm17552	lincRNA	1.42997	0.0445032
ENSMUSG00000028459,7	Cd72	protein_coding	1.42996	0.0311281
ENSMUSG00000052631,10	Sh2d6	protein_coding	1.4295	0.0361408
ENSMUSG00000035576,9	L3mbtl1	protein_coding	1.42889	0.00556815
ENSMUSG00000084989,3	E030010N08Rik	protein_coding	1.42866	0.000616542
ENSMUSG00000030091,13	Nup210	protein_coding	1.42863	0.000182638
ENSMUSG00000032131,11	Abcg4	protein_coding	1.42797	0.00840249
ENSMUSG00000029219,7	Slc10a4	protein_coding	1.42746	0.0354198
ENSMUSG00000006378,9	Gcat	protein_coding	1.42676	0.00246481
ENSMUSG00000032508,8	Myd88	protein_coding	1.42639	0.0384917
ENSMUSG00000036098,11	Myrf	protein_coding	1.42541	0.000126812
ENSMUSG00000020823,12	Sec14l1	protein_coding	1.4254	0.000810881
ENSMUSG00000031816,10	Mthfsd	protein_coding	1.42537	0.000520768
ENSMUSG00000091694,4	Apol11b	protein_coding	1.42444	0.00681608
ENSMUSG00000038204,9	Asb10	protein_coding	1.42441	0.00532689
ENSMUSG00000037344,9	Slc12a9	protein_coding	1.42414	0.00271604
ENSMUSG00000020882,13	Cacnb1	protein_coding	1.42384	0.00522149
ENSMUSG00000059674,6	Cdh24	protein_coding	1.42384	0.0478109
ENSMUSG00000037139,11	Myom3	protein_coding	1.42357	0.000373417
ENSMUSG00000043857,12	Mgat5b	protein_coding	1.42347	0.00531523
ENSMUSG00000031778,8	Cx3cl1	protein_coding	1.42229	0.0359561
ENSMUSG00000030584,9	Dpf1	protein_coding	1.42186	0.0410205
ENSMUSG00000018537,12	Pcgf2	protein_coding	1.42114	0.00779337
ENSMUSG00000036606,12	Plxnb2	protein_coding	1.42028	0.000505038
ENSMUSG00000020109,9	Dnajb12	protein_coding	1.42023	0.0213715
ENSMUSG00000022580,8	Rhpn1	protein_coding	1.41997	0.0425847
ENSMUSG00000025475,13	Gpr123	protein_coding	1.41965	0.00626757
ENSMUSG00000022103,9	Gfra2	protein_coding	1.41965	0.0246406
ENSMUSG00000020893,13	Per1	protein_coding	1.41917	0.00175945
ENSMUSG00000032579,10	Hemk1	protein_coding	1.41876	0.0163847
ENSMUSG00000038604,8	Fam65a	protein_coding	1.41856	0.00194734
ENSMUSG00000086740,1	Gm17029	antisense	1.41839	0.0394849
ENSMUSG00000048445,6	Ccdc57	protein_coding	1.41824	0.0026612
ENSMUSG00000002910,10	Arrdc2	protein_coding	1.4182	0.0394849
ENSMUSG00000026259,10	Ngef	protein_coding	1.41779	0.00387232
ENSMUSG00000042240,10	Crybb2	protein_coding	1.41715	0.0171581
ENSMUSG00000040828,9	Catsperd	protein_coding	1.41704	0.0204859
ENSMUSG00000061126,4	Cyp4f39	protein_coding	1.41695	0.00797851
ENSMUSG00000020681,10	Ace	protein_coding	1.41685	0.00249401
ENSMUSG00000044092,8	C130050O18Rik	protein_coding	1.41673	0.0106408
ENSMUSG00000023266,7	Frs3	protein_coding	1.41672	0.0293241
ENSMUSG00000050910,5	Cdr2l	protein_coding	1.41668	0.0098197
ENSMUSG00000022469,12	Rapgef3	protein_coding	1.41597	0.00492472
ENSMUSG00000017390,11	Aldoc	protein_coding	1.41572	0.0346382
ENSMUSG00000033902,11	Mapkbp1	protein_coding	1.41551	0.0010042
ENSMUSG00000031788,9	Kifc3	protein_coding	1.41548	0.00446901
ENSMUSG00000044716,8	Dok7	protein_coding	1.41513	0.0176486
ENSMUSG00000097209,1	AU022754	lincRNA	1.41497	0.0405205
ENSMUSG00000037446,9	Tulp1	protein_coding	1.41484	0.00335492
ENSMUSG00000042002,7	Foxn4	protein_coding	1.41382	0.03748
ENSMUSG00000009246,10	Trpm5	protein_coding	1.41083	0.00302846
ENSMUSG00000025854,11	Fam20c	protein_coding	1.41068	0.00541836
ENSMUSG00000040866,9	Rsph6a	protein_coding	1.41018	0.0205758
ENSMUSG00000026923,11	Notch1	protein_coding	1.40973	0.000193706
ENSMUSG00000078234,6	Klhdc7a	protein_coding	1.40904	0.0184346
ENSMUSG00000002771,10	Grin2d	protein_coding	1.40893	0.000553909
ENSMUSG00000024955,9	Esrra	protein_coding	1.40867	0.00872602
ENSMUSG00000055805,10	Fmnl1	protein_coding	1.40751	0.000998723
ENSMUSG00000037552,13	Plekhg2	protein_coding	1.40679	0.00335881
ENSMUSG00000040287,5	Stac3	protein_coding	1.40667	0.00927042
ENSMUSG00000030433,10	Sbk2	protein_coding	1.40664	0.0411533
ENSMUSG00000024846,5	Cst6	protein_coding	1.40643	0.0227562
ENSMUSG00000024731,11	Ms4a10	protein_coding	1.40543	0.0315372
ENSMUSG00000027327,12	1700037H04Rik	protein_coding	1.40516	0.0423594
ENSMUSG00000028645,6	Slc2a1	protein_coding	1.40494	0.0286797
ENSMUSG00000002870,7	Mcm2	protein_coding	1.40484	0.00809277
ENSMUSG00000049577,10	Zfpm1	protein_coding	1.40462	0.00267485
ENSMUSG00000039813,10	Tbc1d2	protein_coding	1.40415	0.0138268
ENSMUSG00000024041,8	Cryaa	protein_coding	1.40412	0.0438781
ENSMUSG00000031831,6	Dnaaf1	protein_coding	1.40377	0.00787735
ENSMUSG00000024669,7	Cd5	protein_coding	1.40344	0.018536
ENSMUSG00000032936,9	Camkv	protein_coding	1.40333	0.00716774
ENSMUSG00000094626,1	Cecr6	protein_coding	1.40316	0.0371991
ENSMUSG00000003863,12	Ppfia3	protein_coding	1.40294	0.00123145
ENSMUSG00000030979,8	Uros	protein_coding	1.40284	0.00314804
ENSMUSG00000029406,11	Pitpnm2	protein_coding	1.4026	0.00932739
ENSMUSG00000005320,9	Fgfr4	protein_coding	1.40123	0.0442176
ENSMUSG00000034471,8	Caskin2	protein_coding	1.40089	0.00318914
ENSMUSG00000042429,8	Adora1	protein_coding	1.40077	0.0169012
ENSMUSG00000039308,5	Ndst2	protein_coding	1.40071	0.00549552
ENSMUSG00000040310,8	Alx4	protein_coding	1.40033	0.00328638
ENSMUSG00000062906,8	Hdac10	protein_coding	1.39886	0.0171681
ENSMUSG00000031790,7	Mmp15	protein_coding	1.39862	0.0128702
ENSMUSG00000097006,3	9530082P21Rik	lincRNA	1.39846	0.0269355
ENSMUSG00000029071,12	Dvl1	protein_coding	1.39805	0.0181182
ENSMUSG00000020100,11	Slc29a3	protein_coding	1.39797	0.00120975
ENSMUSG00000039345,11	Mettl22	protein_coding	1.3979	0.0291608
ENSMUSG00000060962,8	Dmkn	protein_coding	1.3977	0.00990475
ENSMUSG00000000889,8	Dbh	protein_coding	1.39721	0.0144704
ENSMUSG00000042428,6	Mgat3	protein_coding	1.39657	0.0465705
ENSMUSG00000044320,10	1700001O22Rik	protein_coding	1.39651	0.0424707
ENSMUSG00000029482,3	Aacs	protein_coding	1.39588	0.00453189
ENSMUSG00000024347,12	Psd2	protein_coding	1.3958	0.0179471
ENSMUSG00000003033,10	Ap1m1	protein_coding	1.3956	0.00203902
ENSMUSG00000025169,6	Ogfod3	protein_coding	1.39543	0.0474278
ENSMUSG00000037553,10	Zdhhc18	protein_coding	1.39513	0.0220222
ENSMUSG00000000148,13	Brat1	protein_coding	1.39486	0.000998723
ENSMUSG00000078619,6	Smarcd2	protein_coding	1.39454	0.0124676
ENSMUSG00000035504,12	Reep6	protein_coding	1.39423	0.0020268
ENSMUSG00000007034,11	Slc44a4	protein_coding	1.39391	0.00667596
ENSMUSG00000029602,7	Rasal1	protein_coding	1.39371	0.00955986
ENSMUSG00000026825,13	Dnm1	protein_coding	1.39353	0.00369629
ENSMUSG00000044933,2	Sstr3	protein_coding	1.39343	0.015728
ENSMUSG00000032777,8	Gtf3c1	protein_coding	1.39337	0.00069368
ENSMUSG00000084883,1	Ccdc85c	protein_coding	1.3928	0.0340925
ENSMUSG00000054252,13	Fgfr3	protein_coding	1.39272	0.00530201
ENSMUSG00000017639,9	Rab11fip4	protein_coding	1.39267	0.000527741
ENSMUSG00000030352,10	Tspan9	protein_coding	1.3921	0.00554297
ENSMUSG00000005373,9	Mlxipl	protein_coding	1.39165	0.0035536
ENSMUSG00000034156,12	Bzrap1	protein_coding	1.39138	0.000508285
ENSMUSG00000022439,5	Parvg	protein_coding	1.39096	0.0205951
ENSMUSG00000078789,5	Dph1	protein_coding	1.39057	0.0119939
ENSMUSG00000059668,5	Krt4	protein_coding	1.3898	0.0410938
ENSMUSG00000024191,10	Bnip1	protein_coding	1.38979	0.0267614
ENSMUSG00000046541,8	Zfp526	protein_coding	1.38899	0.0167017
ENSMUSG00000038517,11	Tbkbp1	protein_coding	1.38852	0.0137466
ENSMUSG00000030789,8	Itgax	protein_coding	1.38849	0.0167412
ENSMUSG00000033316,10	Galnt9	protein_coding	1.38798	0.0117664
ENSMUSG00000087623,1	Gm12404	processed_transcript	1.38774	0.045731
ENSMUSG00000042558,12	Adprhl2	protein_coding	1.38626	0.0473454
ENSMUSG00000027560,4	Dok5	protein_coding	1.38614	0.0349836
ENSMUSG00000027894,10	Slc6a17	protein_coding	1.38612	0.00222065
ENSMUSG00000074657,4	Kif5a	protein_coding	1.38568	0.000401843
ENSMUSG00000041354,11	Rgl2	protein_coding	1.38562	0.00373267
ENSMUSG00000002396,8	Ocel1	protein_coding	1.38517	0.00187114
ENSMUSG00000016757,6	Ttll12	protein_coding	1.38507	0.016688
ENSMUSG00000034201,9	Gas2l1	protein_coding	1.38471	0.00319855
ENSMUSG00000038917,3	3930402G23Rik	lincRNA	1.38454	0.0490353
ENSMUSG00000054146,8	Krt15	protein_coding	1.38437	0.0405702
ENSMUSG00000041237,8	Pklr	protein_coding	1.3839	0.0234899
ENSMUSG00000028453,6	Fancg	protein_coding	1.38389	0.0116978
ENSMUSG00000025316,12	Banp	protein_coding	1.38215	0.000547271
ENSMUSG00000032583,3	Mon1a	protein_coding	1.38142	0.0292218
ENSMUSG00000006574,11	Slc4a1	protein_coding	1.38125	0.00237148
ENSMUSG00000059540,11	Tcea2	protein_coding	1.38111	0.0318679
ENSMUSG00000078670,2	Fam174b	protein_coding	1.38087	0.0396467
ENSMUSG00000087242,2	C78197	antisense	1.38027	0.0391428
ENSMUSG00000045009,7	Prrt3	protein_coding	1.38022	0.0463784
ENSMUSG00000003378,8	Grik5	protein_coding	1.37973	0.00583897
ENSMUSG00000027485,11	Bpifb1	protein_coding	1.37884	0.0181407
ENSMUSG00000053024,10	Cntn2	protein_coding	1.37859	0.00208152
ENSMUSG00000047649,8	Cd3eap	protein_coding	1.37808	0.0291954
ENSMUSG00000042178,5	Armc5	protein_coding	1.37754	0.00352854
ENSMUSG00000026251,9	Chrnd	protein_coding	1.37607	0.0078231
ENSMUSG00000052563,9	D930048N14Rik	protein_coding	1.37527	0.0445032
ENSMUSG00000001054,5	Rmnd5b	protein_coding	1.37269	0.0423987
ENSMUSG00000038239,9	Hrc	protein_coding	1.37265	0.0128702
ENSMUSG00000010651,4	Acaa1b	protein_coding	1.37168	0.0307379
ENSMUSG00000041729,11	Coro2b	protein_coding	1.37147	0.00360974
ENSMUSG00000079466,2	Prdm12	protein_coding	1.3714	0.0330883
ENSMUSG00000003934,5	Efnb3	protein_coding	1.37101	0.0206579
ENSMUSG00000024209,9	1700061G19Rik	protein_coding	1.37046	0.029066
ENSMUSG00000003644,13	Rps6ka1	protein_coding	1.37004	0.0206633
ENSMUSG00000032128,10	Robo3	protein_coding	1.3699	0.00045061
ENSMUSG00000037579,6	Kcnh3	protein_coding	1.36941	0.0278388
ENSMUSG00000044456,12	Rin3	protein_coding	1.36932	0.000518582
ENSMUSG00000027075,12	Slc43a1	protein_coding	1.36876	0.00907436
ENSMUSG00000046408,9	1700067K01Rik	protein_coding	1.36848	0.0380094
ENSMUSG00000047013,11	Fbxo41	protein_coding	1.36827	0.0038358
ENSMUSG00000061462,11	Obscn	protein_coding	1.36721	0.000702249
ENSMUSG00000039137,14	Whrn	protein_coding	1.36647	0.0057931
ENSMUSG00000070000,9	Fcho1	protein_coding	1.36599	0.00307292
ENSMUSG00000044345,9	Marveld1	protein_coding	1.36585	0.00121118
ENSMUSG00000003344,10	Btbd2	protein_coding	1.36581	0.00738032
ENSMUSG00000032114,8	Slc37a4	protein_coding	1.36571	0.0283465
ENSMUSG00000026207,12	Speg	protein_coding	1.36516	7.31659e-05
ENSMUSG00000049608,8	Gpr55	protein_coding	1.36384	0.0113598
ENSMUSG00000069971,5	4933402J07Rik	protein_coding	1.3627	0.0389363
ENSMUSG00000023980,6	Taf8	protein_coding	1.36265	0.022031
ENSMUSG00000035914,6	Cd276	protein_coding	1.36262	0.0154487
ENSMUSG00000053137,6	Mapk11	protein_coding	1.36245	0.0445385
ENSMUSG00000015461,11	Atf6b	protein_coding	1.36108	0.00276104
ENSMUSG00000014303,9	Glis2	protein_coding	1.36092	0.00705328
ENSMUSG00000030782,11	Tgfb1i1	protein_coding	1.36071	0.0193431
ENSMUSG00000085471,1	4933423P22Rik	antisense	1.36008	0.000847426
ENSMUSG00000060470,6	Gpr97	protein_coding	1.35975	0.00187114
ENSMUSG00000074555,5	Gm10714	antisense	1.35967	0.0493169
ENSMUSG00000031845,11	Bco1	protein_coding	1.35965	0.0186893
ENSMUSG00000052026,7	Slc6a7	protein_coding	1.35879	0.0358029
ENSMUSG00000026450,10	Chit1	protein_coding	1.35858	0.0156205
ENSMUSG00000032312,6	Csk	protein_coding	1.35793	0.0372053
ENSMUSG00000066640,7	Fbxl18	protein_coding	1.35619	0.00054316
ENSMUSG00000015127,10	Unkl	protein_coding	1.35571	0.0112487
ENSMUSG00000036644,11	Tbc1d9b	protein_coding	1.35561	0.00228716
ENSMUSG00000041534,8	Rbp3	protein_coding	1.35541	0.0300549
ENSMUSG00000020435,13	Osbp2	protein_coding	1.35528	0.0137447
ENSMUSG00000026751,10	Nr5a1	protein_coding	1.35516	0.0262825
ENSMUSG00000021608,10	Lpcat1	protein_coding	1.35506	0.00708328
ENSMUSG00000034022,7	Cpsf1	protein_coding	1.35485	0.00715716
ENSMUSG00000051586,10	Mical3	protein_coding	1.35447	0.00184116
ENSMUSG00000028599,6	Tnfrsf1b	protein_coding	1.35416	0.0326753
ENSMUSG00000055322,10	Tns1	protein_coding	1.35402	0.000112407
ENSMUSG00000026816,10	Gtf3c5	protein_coding	1.35373	0.00344053
ENSMUSG00000026443,3	Lrrn2	protein_coding	1.35282	0.00947509
ENSMUSG00000020604,9	Arsg	protein_coding	1.35212	0.0473454
ENSMUSG00000018845,10	Unc45b	protein_coding	1.35188	0.00551737
ENSMUSG00000040533,7	Matn1	protein_coding	1.35164	0.0221479
ENSMUSG00000033256,10	Shf	protein_coding	1.35158	0.016299
ENSMUSG00000023473,7	Celsr3	protein_coding	1.35144	0.000212374
ENSMUSG00000033068,12	Entpd6	protein_coding	1.3513	0.0143389
ENSMUSG00000024053,10	Emilin2	protein_coding	1.35115	0.0165947
ENSMUSG00000024913,12	Lrp5	protein_coding	1.35097	0.000277874
ENSMUSG00000042632,12	Pla2g6	protein_coding	1.35073	0.000193182
ENSMUSG00000074899,4	Sptbn5	protein_coding	1.35051	0.000222942
ENSMUSG00000024008,11	Cpne5	protein_coding	1.35029	0.000167265
ENSMUSG00000103183,1	RP23-118E21,11	TEC	1.34962	0.040126
ENSMUSG00000031822,14	Gse1	protein_coding	1.34956	0.00166809
ENSMUSG00000028949,9	Smarcd3	protein_coding	1.34925	0.0285642
ENSMUSG00000045039,9	Megf8	protein_coding	1.34909	0.00035209
ENSMUSG00000020400,13	Tnip1	protein_coding	1.34804	0.00401684
ENSMUSG00000039699,9	Batf2	protein_coding	1.3469	0.0206633
ENSMUSG00000019470,8	Xab2	protein_coding	1.34588	0.00271604
ENSMUSG00000038351,10	Sgsm2	protein_coding	1.34568	0.00320688
ENSMUSG00000039568,6	Ubald1	protein_coding	1.34558	0.0393693
ENSMUSG00000033209,13	Ttc28	protein_coding	1.34508	0.000854064
ENSMUSG00000024900,4	Cpt1a	protein_coding	1.34486	0.00187114
ENSMUSG00000012126,12	Ubxn11	protein_coding	1.34469	0.0326971
ENSMUSG00000025876,11	Unc5a	protein_coding	1.34459	0.0301552
ENSMUSG00000086775,3	Snhg7os	antisense	1.34452	0.0339805
ENSMUSG00000038000,9	Acd	protein_coding	1.34443	0.0189096
ENSMUSG00000069633,8	Pex11g	protein_coding	1.34418	0.0179891
ENSMUSG00000032528,4	Vipr1	protein_coding	1.34415	0.00271921
ENSMUSG00000016995,13	Matn4	protein_coding	1.3441	0.00529394
ENSMUSG00000001229,7	Dpp9	protein_coding	1.34324	0.00760934
ENSMUSG00000059323,9	Tonsl	protein_coding	1.34248	0.00457064
ENSMUSG00000017664,12	Slc35c2	protein_coding	1.34238	0.0126922
ENSMUSG00000053093,11	Myh7	protein_coding	1.341	0.000854064
ENSMUSG00000064125,10	BC068157	protein_coding	1.3408	0.00245384
ENSMUSG00000038020,5	Rapgefl1	protein_coding	1.3407	0.00685877
ENSMUSG00000001672,10	Marveld3	protein_coding	1.34011	0.0196363
ENSMUSG00000096798,1	Gm6309	protein_coding	1.33997	0.0421338
ENSMUSG00000031805,13	Jak3	protein_coding	1.33888	0.0021586
ENSMUSG00000020135,9	Apc2	protein_coding	1.33861	0.00199416
ENSMUSG00000020701,8	Tmem132e	protein_coding	1.338	0.0223953
ENSMUSG00000024734,4	Zp1	protein_coding	1.33723	0.0203649
ENSMUSG00000026627,7	Tmem206	protein_coding	1.33572	0.0317339
ENSMUSG00000037868,11	Egr2	protein_coding	1.33561	0.0318806
ENSMUSG00000001755,8	Coasy	protein_coding	1.33559	0.0145401
ENSMUSG00000041642,14	Kif21b	protein_coding	1.33542	0.00034377
ENSMUSG00000038963,11	Slco4a1	protein_coding	1.33531	0.00647124
ENSMUSG00000027470,9	Mylk2	protein_coding	1.33461	0.0260669
ENSMUSG00000048905,4	4930539E08Rik	protein_coding	1.33425	0.0186398
ENSMUSG00000087028,3	Gm13387	lincRNA	1.33405	0.0384197
ENSMUSG00000051735,6	Rinl	protein_coding	1.33386	0.0422455
ENSMUSG00000030123,11	Plxnd1	protein_coding	1.33345	0.00391567
ENSMUSG00000002812,4	Flii	protein_coding	1.33283	0.0021586
ENSMUSG00000000530,12	Acvrl1	protein_coding	1.33279	0.0163199
ENSMUSG00000028655,7	Mfsd2a	protein_coding	1.33231	0.0395293
ENSMUSG00000017740,12	Slc12a5	protein_coding	1.33226	0.00217773
ENSMUSG00000048677,8	Tpcn2	protein_coding	1.33203	0.0148216
ENSMUSG00000057176,3	Gm166	protein_coding	1.33114	0.0333939
ENSMUSG00000026437,7	Cdk18	protein_coding	1.33113	0.00456375
ENSMUSG00000031442,16	Mcf2l	protein_coding	1.33071	0.000220266
ENSMUSG00000058586,7	Serhl	protein_coding	1.33019	0.00218356
ENSMUSG00000010825,13	Grid2ip	protein_coding	1.33012	0.00243123
ENSMUSG00000025407,6	Gli1	protein_coding	1.3297	0.011009
ENSMUSG00000035279,7	Ssc5d	protein_coding	1.32959	0.0142611
ENSMUSG00000041460,10	Cacna2d4	protein_coding	1.32916	0.000702249
ENSMUSG00000020241,9	Col6a2	protein_coding	1.32916	0.000783743
ENSMUSG00000001436,11	Slc19a1	protein_coding	1.32909	0.0163083
ENSMUSG00000023829,8	Slc22a1	protein_coding	1.32906	0.0377796
ENSMUSG00000019737,10	Syne4	protein_coding	1.32896	0.0300561
ENSMUSG00000079429,5	Mroh2a	protein_coding	1.32854	0.000639339
ENSMUSG00000010492,10	Uckl1os	antisense	1.32853	0.0353941
ENSMUSG00000024792,4	Zfpl1	protein_coding	1.32776	0.046105
ENSMUSG00000024617,12	Camk2a	protein_coding	1.32763	0.00768853
ENSMUSG00000045672,11	Col27a1	protein_coding	1.32656	0.000213927
ENSMUSG00000025577,7	Cbx2	protein_coding	1.32608	0.025363
ENSMUSG00000030737,12	Slco2b1	protein_coding	1.32593	0.00595014
ENSMUSG00000024960,8	Plcb3	protein_coding	1.32593	0.000910622
ENSMUSG00000052296,6	Ppp6r1	protein_coding	1.32572	0.018648
ENSMUSG00000028047,7	Thbs3	protein_coding	1.32411	0.0103271
ENSMUSG00000032513,7	Gorasp1	protein_coding	1.32406	0.0442176
ENSMUSG00000086296,2	D030055H07Rik	antisense	1.32392	0.00890471
ENSMUSG00000046295,9	Ankle1	protein_coding	1.3234	0.0390766
ENSMUSG00000038838,11	Vars2	protein_coding	1.32317	0.00838734
ENSMUSG00000031970,12	Dbndd1	protein_coding	1.32241	0.0358862
ENSMUSG00000044390,4	Tigd3	protein_coding	1.3224	0.0329496
ENSMUSG00000097156,3	Gm3764	lincRNA	1.32204	0.00335881
ENSMUSG00000006241,11	Ccdc159	protein_coding	1.32197	0.00909713
ENSMUSG00000101729,1	Gm17796	processed_pseudogene	1.32147	0.0311281
ENSMUSG00000015120,11	Ube2i	protein_coding	1.32121	0.00724175
ENSMUSG00000015981,8	Stk32c	protein_coding	1.32063	0.036388
ENSMUSG00000024670,12	Cd6	protein_coding	1.3205	0.00623041
ENSMUSG00000062012,9	Zfp13	protein_coding	1.32013	0.0451487
ENSMUSG00000028041,13	Adam15	protein_coding	1.31998	0.0327514
ENSMUSG00000006517,4	Mvd	protein_coding	1.31939	0.0378851
ENSMUSG00000015468,10	Notch4	protein_coding	1.31935	0.000836482
ENSMUSG00000042216,9	Sgsm1	protein_coding	1.31924	0.000499637
ENSMUSG00000045004,3	Spata21	protein_coding	1.31903	0.0164523
ENSMUSG00000038486,8	Sv2a	protein_coding	1.31889	0.00507712
ENSMUSG00000029121,11	Crmp1	protein_coding	1.31869	0.0330022
ENSMUSG00000038167,6	Plekhg6	protein_coding	1.31846	0.0170308
ENSMUSG00000028468,11	Rgp1	protein_coding	1.31824	0.0106335
ENSMUSG00000024965,8	Fermt3	protein_coding	1.31793	0.0181407
ENSMUSG00000038298,10	Pdzk1	protein_coding	1.31756	0.0302852
ENSMUSG00000040829,10	Zmynd15	protein_coding	1.3169	0.0142614
ENSMUSG00000008028,11	1700008O03Rik	protein_coding	1.31679	0.00549552
ENSMUSG00000020758,11	Itgb4	protein_coding	1.31657	0.000437058
ENSMUSG00000054013,5	Tmem179	protein_coding	1.31605	0.0417263
ENSMUSG00000031661,7	Nkd1	protein_coding	1.31592	0.0336329
ENSMUSG00000068735,10	Trp53i11	protein_coding	1.31554	0.0247003
ENSMUSG00000035165,9	Kcne3	protein_coding	1.31546	0.0185267
ENSMUSG00000075604,5	Cyp11b1	protein_coding	1.31525	0.0481907
ENSMUSG00000026308,8	Klhl30	protein_coding	1.31486	0.0162624
ENSMUSG00000069873,3	4930438A08Rik	protein_coding	1.31485	0.0498217
ENSMUSG00000028776,10	Tinagl1	protein_coding	1.31439	0.00526243
ENSMUSG00000042826,9	Fgf11	protein_coding	1.31402	0.0211554
ENSMUSG00000018470,4	Kcnab3	protein_coding	1.31339	0.0464661
ENSMUSG00000024050,11	Wiz	protein_coding	1.313	0.00338777
ENSMUSG00000030592,12	Ryr1	protein_coding	1.31267	0.00013263
ENSMUSG00000042286,9	Stab1	protein_coding	1.31256	0.000279492
ENSMUSG00000006585,2	Cdt1	protein_coding	1.31244	0.0117082
ENSMUSG00000004677,11	Myo9b	protein_coding	1.31239	0.000337679
ENSMUSG00000034310,7	Tmem132d	protein_coding	1.31208	0.0177024
ENSMUSG00000091712,1	Sec14l5	protein_coding	1.3113	0.03748
ENSMUSG00000002279,14	Lmf1	protein_coding	1.31099	0.000610924
ENSMUSG00000020805,9	Slc13a5	protein_coding	1.31047	0.0461713
ENSMUSG00000031835,11	Mbtps1	protein_coding	1.31028	0.000322616
ENSMUSG00000026204,11	Ptprn	protein_coding	1.31004	0.00208982
ENSMUSG00000000489,6	Pdgfb	protein_coding	1.30989	0.028423
ENSMUSG00000031962,5	Cdh15	protein_coding	1.30921	0.0124457
ENSMUSG00000051786,10	Tubgcp6	protein_coding	1.30899	0.00193207
ENSMUSG00000042401,6	Crtac1	protein_coding	1.30856	0.00218566
ENSMUSG00000003534,13	Ddr1	protein_coding	1.30843	0.00770239
ENSMUSG00000040688,12	Tbl3	protein_coding	1.30793	0.0190789
ENSMUSG00000036526,7	Card11	protein_coding	1.30713	0.000610924
ENSMUSG00000019139,9	Isyna1	protein_coding	1.30672	0.0246418
ENSMUSG00000020686,8	Gas2l2	protein_coding	1.30559	0.0347323
ENSMUSG00000036246,10	Gmip	protein_coding	1.30498	0.00208152
ENSMUSG00000027546,11	Atp9a	protein_coding	1.30493	0.00338079
ENSMUSG00000031787,7	Katnb1	protein_coding	1.30475	0.0035432
ENSMUSG00000027457,11	Snph	protein_coding	1.30413	0.00237148
ENSMUSG00000025576,13	Rbfox3	protein_coding	1.30412	0.00266127
ENSMUSG00000097960,1	A330074K22Rik	lincRNA	1.30407	0.0202011
ENSMUSG00000037447,12	Arid5a	protein_coding	1.30284	0.00220709
ENSMUSG00000027322,7	Siglec1	protein_coding	1.30268	0.00368154
ENSMUSG00000009621,14	Vav2	protein_coding	1.30117	0.00128354
ENSMUSG00000037432,12	Fer1l5	protein_coding	1.30032	0.00059645
ENSMUSG00000043986,5	Spata31d1d	protein_coding	1.29972	0.0244662
ENSMUSG00000034112,8	Atp2c2	protein_coding	1.29926	0.00553898
ENSMUSG00000006021,5	Kptn	protein_coding	1.29883	0.0336128
ENSMUSG00000096780,3	Tmem181b-ps	transcribed_unprocessed_pseudogene	1.29881	0.00116336
ENSMUSG00000002546,12	Golga2	protein_coding	1.29858	0.00514856
ENSMUSG00000023348,10	Trip6	protein_coding	1.29837	0.0203987
ENSMUSG00000031443,7	F7	protein_coding	1.29833	0.0261189
ENSMUSG00000038034,11	Igsf8	protein_coding	1.2982	0.0161698
ENSMUSG00000023328,10	Ache	protein_coding	1.29771	0.00965094
ENSMUSG00000027646,11	Src	protein_coding	1.29704	0.00378231
ENSMUSG00000031808,6	Slc27a1	protein_coding	1.29688	0.0235561
ENSMUSG00000039661,10	Dusp26	protein_coding	1.29658	0.0282261
ENSMUSG00000033706,9	Smyd5	protein_coding	1.29629	0.0356228
ENSMUSG00000013483,10	Card14	protein_coding	1.29622	0.0108702
ENSMUSG00000007216,4	Zfp775	protein_coding	1.29615	0.0477687
ENSMUSG00000066621,8	Tecpr1	protein_coding	1.29609	0.000688918
ENSMUSG00000085747,1	Slc13a2os	antisense	1.29565	0.013824
ENSMUSG00000026090,12	2010300C02Rik	protein_coding	1.29516	0.0132941
ENSMUSG00000020827,14	Mink1	protein_coding	1.29504	0.000711016
ENSMUSG00000071713,4	Csf2rb	protein_coding	1.2948	0.0339837
ENSMUSG00000015709,8	Arnt2	protein_coding	1.29473	0.00966398
ENSMUSG00000063146,7	Clip2	protein_coding	1.29406	0.00120975
ENSMUSG00000067586,3	S1pr3	protein_coding	1.29397	0.0315382
ENSMUSG00000023938,7	Aars2	protein_coding	1.2939	0.0120135
ENSMUSG00000060216,11	Arrb2	protein_coding	1.29373	0.0396587
ENSMUSG00000039492,7	Ccdc27	protein_coding	1.2937	0.0466053
ENSMUSG00000020387,11	Jade2	protein_coding	1.29306	0.000233375
ENSMUSG00000024862,12	Klc2	protein_coding	1.293	0.00236297
ENSMUSG00000005553,9	Atp4a	protein_coding	1.29285	0.0342425
ENSMUSG00000037466,9	4930427A07Rik	protein_coding	1.29211	0.0179572
ENSMUSG00000038011,11	Dnah10	protein_coding	1.2919	0.000385217
ENSMUSG00000035179,3	Ppp1r32	protein_coding	1.29146	0.0212938
ENSMUSG00000024948,10	Map4k2	protein_coding	1.29089	0.000304923
ENSMUSG00000020092,8	Pald1	protein_coding	1.29078	0.00888815
ENSMUSG00000011148,9	Adssl1	protein_coding	1.29034	0.0435681
ENSMUSG00000039754,6	Alkbh4	protein_coding	1.29012	0.0478574
ENSMUSG00000025209,4	Peo1	protein_coding	1.2889	0.00119571
ENSMUSG00000034792,8	Gna15	protein_coding	1.28867	0.0210985
ENSMUSG00000024168,7	Tmem204	protein_coding	1.28839	0.024857
ENSMUSG00000025355,6	Mmp19	protein_coding	1.28838	0.0311281
ENSMUSG00000004952,9	Rasa4	protein_coding	1.2872	0.0029556
ENSMUSG00000060224,3	Pyroxd2	protein_coding	1.28718	0.00911262
ENSMUSG00000007610,11	Gtpbp3	protein_coding	1.28711	0.00455146
ENSMUSG00000085196,1	Gm14963	processed_transcript	1.28652	0.00937178
ENSMUSG00000033697,11	Arhgap39	protein_coding	1.2863	0.0124662
ENSMUSG00000028708,12	Mknk1	protein_coding	1.28583	0.0151414
ENSMUSG00000017715,7	Pgs1	protein_coding	1.28582	0.00280336
ENSMUSG00000071714,5	Csf2rb2	protein_coding	1.28368	0.00878581
ENSMUSG00000036450,4	Hif1an	protein_coding	1.28293	0.00244507
ENSMUSG00000034159,8	2310007B03Rik	protein_coding	1.28284	0.0458452
ENSMUSG00000022211,8	Lrrc16b	protein_coding	1.2819	0.0260669
ENSMUSG00000053552,10	Ebf4	protein_coding	1.28162	0.0314231
ENSMUSG00000049353,13	Rd3	protein_coding	1.28003	0.0280802
ENSMUSG00000048142,8	Nat8l	protein_coding	1.27928	0.0374672
ENSMUSG00000046822,8	Slc39a3	protein_coding	1.27908	0.0326011
ENSMUSG00000000731,11	Aire	protein_coding	1.27855	0.00731249
ENSMUSG00000042328,9	Hps4	protein_coding	1.27832	0.023008
ENSMUSG00000020431,5	Adcy1	protein_coding	1.27784	0.000499799
ENSMUSG00000031451,5	Gas6	protein_coding	1.27755	0.0323465
ENSMUSG00000027223,11	Mapk8ip1	protein_coding	1.27726	0.0200775
ENSMUSG00000018566,10	Slc2a4	protein_coding	1.27697	0.00570854
ENSMUSG00000037103,7	Dcaf15	protein_coding	1.27656	0.0369213
ENSMUSG00000048402,10	Gli2	protein_coding	1.27594	0.00421451
ENSMUSG00000055866,9	Per2	protein_coding	1.27559	0.00335492
ENSMUSG00000078517,7	Emc1	protein_coding	1.27444	0.019248
ENSMUSG00000000125,5	Wnt3	protein_coding	1.27413	0.0423987
ENSMUSG00000027612,7	Mmp24	protein_coding	1.27386	0.0212732
ENSMUSG00000032394,5	Igdcc3	protein_coding	1.27303	0.0302771
ENSMUSG00000063430,8	Wscd2	protein_coding	1.27287	0.000887167
ENSMUSG00000042978,9	Sbk1	protein_coding	1.27257	0.0271919
ENSMUSG00000025515,11	Muc2	protein_coding	1.27249	0.00276541
ENSMUSG00000008036,10	Ap2s1	protein_coding	1.27206	0.0401793
ENSMUSG00000027332,7	Ivd	protein_coding	1.27186	0.0207062
ENSMUSG00000018167,6	Stard3	protein_coding	1.27152	0.0225863
ENSMUSG00000022780,5	Mfi2	protein_coding	1.27099	0.0187773
ENSMUSG00000029478,12	Ncor2	protein_coding	1.27093	0.000694808
ENSMUSG00000033147,12	Slc22a15	protein_coding	1.27082	0.00306723
ENSMUSG00000034708,7	Grn	protein_coding	1.2708	0.0498265
ENSMUSG00000049303,6	Syt12	protein_coding	1.2708	0.00809296
ENSMUSG00000040907,11	Atp1a3	protein_coding	1.27001	0.00502922
ENSMUSG00000070315,7	4930581F22Rik	processed_transcript	1.26901	0.00110315
ENSMUSG00000046049,6	Rp1l1	protein_coding	1.26802	0.0177024
ENSMUSG00000044294,7	Krt84	protein_coding	1.26775	0.0445032
ENSMUSG00000032089,12	Il10ra	protein_coding	1.26752	0.0125833
ENSMUSG00000031734,12	Irx3	protein_coding	1.26743	0.021944
ENSMUSG00000020740,9	Gga3	protein_coding	1.2673	0.0113465
ENSMUSG00000034416,14	Pkd1l2	protein_coding	1.26681	0.000592952
ENSMUSG00000022144,3	Gdnf	protein_coding	1.26456	0.0166793
ENSMUSG00000070644,9	Etnk2	protein_coding	1.26434	0.0271759
ENSMUSG00000053004,8	Hrh1	protein_coding	1.26306	0.0279476
ENSMUSG00000030880,9	Polr3e	protein_coding	1.26204	0.0254751
ENSMUSG00000041794,8	Myrip	protein_coding	1.2617	0.00686996
ENSMUSG00000032327,10	Stra6	protein_coding	1.26146	0.00393107
ENSMUSG00000042269,11	Fam92b	protein_coding	1.26103	0.0410938
ENSMUSG00000002307,11	Daxx	protein_coding	1.26093	0.0108434
ENSMUSG00000034121,8	Mks1	protein_coding	1.26092	0.0473454
ENSMUSG00000025137,11	Pcyt2	protein_coding	1.26089	0.0488557
ENSMUSG00000024851,9	Pitpnm1	protein_coding	1.26087	0.00135266
ENSMUSG00000028626,5	Col9a2	protein_coding	1.26069	0.0277539
ENSMUSG00000020175,9	Rab36	protein_coding	1.26057	0.00857706
ENSMUSG00000017204,4	Gsdma	protein_coding	1.26051	0.0388196
ENSMUSG00000024883,6	Rin1	protein_coding	1.25957	0.00136111
ENSMUSG00000031851,10	Ntpcr	protein_coding	1.25928	0.0396587
ENSMUSG00000029096,11	Htra3	protein_coding	1.25882	0.020002
ENSMUSG00000058806,10	Col13a1	protein_coding	1.25801	0.00219329
ENSMUSG00000036995,7	Asap3	protein_coding	1.25594	0.0359877
ENSMUSG00000043747,8	1520401A03Rik	processed_transcript	1.2555	0.0138589
ENSMUSG00000005986,11	Ankrd13d	protein_coding	1.25429	0.0238157
ENSMUSG00000001995,8	Sipa1l2	protein_coding	1.25415	0.0015123
ENSMUSG00000014601,9	Strip1	protein_coding	1.25398	0.0356456
ENSMUSG00000012889,8	Podnl1	protein_coding	1.25376	0.0269556
ENSMUSG00000037235,9	Mxd4	protein_coding	1.25302	0.0292218
ENSMUSG00000031893,6	Tsnaxip1	protein_coding	1.25291	0.0298318
ENSMUSG00000038670,9	Mybpc2	protein_coding	1.25237	0.00718463
ENSMUSG00000032691,10	Nlrp3	protein_coding	1.25211	0.0200959
ENSMUSG00000028467,11	Gba2	protein_coding	1.25208	0.040617
ENSMUSG00000032648,10	Pygm	protein_coding	1.25193	0.00325733
ENSMUSG00000043388,7	Tmem130	protein_coding	1.25096	0.0354708
ENSMUSG00000002658,9	Gtf2f1	protein_coding	1.24992	0.01997
ENSMUSG00000048832,8	Vps37c	protein_coding	1.24987	0.0365099
ENSMUSG00000027314,6	Dll4	protein_coding	1.24966	0.0259268
ENSMUSG00000017950,12	Hnf4a	protein_coding	1.24946	0.0118601
ENSMUSG00000044361,11	BC024139	protein_coding	1.24925	0.0397337
ENSMUSG00000024065,7	Ehd3	protein_coding	1.24906	0.0268229
ENSMUSG00000002608,4	Ccdc97	protein_coding	1.24885	0.0207854
ENSMUSG00000001930,13	Vwf	protein_coding	1.24817	0.000900412
ENSMUSG00000028778,11	Hcrtr1	protein_coding	1.24803	0.0453942
ENSMUSG00000033059,7	Pygb	protein_coding	1.24779	0.00478869
ENSMUSG00000031826,15	Usp10	protein_coding	1.24777	0.0123042
ENSMUSG00000026442,10	Nfasc	protein_coding	1.24742	0.000384475
ENSMUSG00000028962,10	Slc4a2	protein_coding	1.24716	0.00488133
ENSMUSG00000028600,11	Podn	protein_coding	1.24714	0.0273961
ENSMUSG00000032598,8	Nckipsd	protein_coding	1.24689	0.0139791
ENSMUSG00000049287,5	Iba57	protein_coding	1.24684	0.0232018
ENSMUSG00000033033,6	Calhm2	protein_coding	1.24677	0.00933609
ENSMUSG00000020886,12	Dlg4	protein_coding	1.24649	0.00845291
ENSMUSG00000032890,13	Rims3	protein_coding	1.24548	0.0152699
ENSMUSG00000071176,6	Arhgef10	protein_coding	1.24467	0.00218356
ENSMUSG00000005514,10	Por	protein_coding	1.24459	0.00594673
ENSMUSG00000022711,11	Pmm2	protein_coding	1.24457	0.0283128
ENSMUSG00000100987,1	Gm1627	lincRNA	1.24444	0.0326715
ENSMUSG00000032470,12	Mras	protein_coding	1.2436	0.0442176
ENSMUSG00000030055,12	Rab43	protein_coding	1.24296	0.0209836
ENSMUSG00000042190,8	Cmklr1	protein_coding	1.24269	0.0371991
ENSMUSG00000014470,4	Rnf166	protein_coding	1.24254	0.0277639
ENSMUSG00000020908,10	Myh3	protein_coding	1.24158	0.000817094
ENSMUSG00000042763,9	Maneal	protein_coding	1.24146	0.0355271
ENSMUSG00000045404,11	Kcnk13	protein_coding	1.2414	0.0317419
ENSMUSG00000025648,13	Pfkfb4	protein_coding	1.24073	0.0224859
ENSMUSG00000024207,8	Acsbg2	protein_coding	1.23986	0.0413335
ENSMUSG00000038520,10	Tbc1d17	protein_coding	1.23984	0.0339922
ENSMUSG00000031024,8	St5	protein_coding	1.23966	0.0147673
ENSMUSG00000036480,9	Prss56	protein_coding	1.23923	0.0492103
ENSMUSG00000002983,12	Relb	protein_coding	1.2389	0.0119421
ENSMUSG00000042810,10	Krba1	protein_coding	1.23821	0.0156398
ENSMUSG00000030084,7	Plxna1	protein_coding	1.23705	0.0047005
ENSMUSG00000038026,8	Kcnj9	protein_coding	1.23704	0.0330883
ENSMUSG00000073418,4	C4b	protein_coding	1.23664	0.00218566
ENSMUSG00000000374,7	Trappc10	protein_coding	1.23631	0.00372964
ENSMUSG00000043557,11	Mdga1	protein_coding	1.2362	0.00128354
ENSMUSG00000038199,8	4931409K22Rik	protein_coding	1.23603	0.00907436
ENSMUSG00000089984,3	Fbxo24	protein_coding	1.23598	0.0473454
ENSMUSG00000006471,13	Ndor1	protein_coding	1.23463	0.0335694
ENSMUSG00000034586,10	Hid1	protein_coding	1.2345	0.0128652
ENSMUSG00000027544,12	Nfatc2	protein_coding	1.23394	0.00108079
ENSMUSG00000025020,7	Slit1	protein_coding	1.23371	0.000334067
ENSMUSG00000032633,8	Flcn	protein_coding	1.23325	0.0171968
ENSMUSG00000097820,2	E530011L22Rik	TEC	1.23312	0.0452273
ENSMUSG00000020847,11	Rph3al	protein_coding	1.23306	0.016689
ENSMUSG00000002781,13	Tmem143	protein_coding	1.23247	0.018508
ENSMUSG00000034949,14	Zfr2	protein_coding	1.23244	0.00994302
ENSMUSG00000046329,10	Slc25a23	protein_coding	1.232	0.0390226
ENSMUSG00000043051,13	Disc1	protein_coding	1.23156	0.012735
ENSMUSG00000036052,10	Dnajb5	protein_coding	1.23143	0.0250153
ENSMUSG00000035200,6	Chrnb4	protein_coding	1.23087	0.0401268
ENSMUSG00000034796,10	Cpne7	protein_coding	1.23014	0.0160189
ENSMUSG00000008999,7	Bmp7	protein_coding	1.23009	0.0399887
ENSMUSG00000075585,3	6330403L08Rik	lincRNA	1.23001	0.0150147
ENSMUSG00000045761,11	Fam179a	protein_coding	1.22893	0.00610678
ENSMUSG00000027318,13	Adam33	protein_coding	1.22886	0.0162984
ENSMUSG00000039376,9	Synpo2l	protein_coding	1.22871	0.0181807
ENSMUSG00000030748,8	Il4ra	protein_coding	1.22866	0.0306922
ENSMUSG00000032690,12	Oas2	protein_coding	1.2279	0.0441751
ENSMUSG00000020476,10	Dbnl	protein_coding	1.22788	0.0328933
ENSMUSG00000028622,7	Mrpl37	protein_coding	1.22787	0.0182996
ENSMUSG00000073102,3	Drc1	protein_coding	1.22758	0.00739402
ENSMUSG00000032786,10	Alas1	protein_coding	1.22699	0.0225863
ENSMUSG00000055833,10	1700034H15Rik	antisense	1.22695	0.0158997
ENSMUSG00000024170,11	Telo2	protein_coding	1.22601	0.00369629
ENSMUSG00000048240,10	Gng7	protein_coding	1.22573	0.025147
ENSMUSG00000078440,5	Dohh	protein_coding	1.22544	0.0250056
ENSMUSG00000028707,11	Dmbx1	protein_coding	1.22484	0.016689
ENSMUSG00000029036,14	Atad3a	protein_coding	1.22482	0.0283832
ENSMUSG00000047547,10	Cltb	protein_coding	1.22463	0.0184018
ENSMUSG00000053550,9	Shisa7	protein_coding	1.22442	0.0249871
ENSMUSG00000035900,14	Gramd4	protein_coding	1.22395	0.0204234
ENSMUSG00000001065,10	Zfp276	protein_coding	1.22379	0.0294522
ENSMUSG00000070719,4	Pla2g4d	protein_coding	1.22341	0.0409319
ENSMUSG00000029162,11	Khk	protein_coding	1.22297	0.0323465
ENSMUSG00000036196,11	Slc26a8	protein_coding	1.22201	0.007584
ENSMUSG00000054874,8	Pcnxl3	protein_coding	1.22119	0.000518582
ENSMUSG00000024947,12	Men1	protein_coding	1.22112	0.00664253
ENSMUSG00000030270,7	Cpne9	protein_coding	1.22081	0.0169455
ENSMUSG00000052488,6	Cherp	protein_coding	1.22033	0.0283465
ENSMUSG00000023886,9	Smoc2	protein_coding	1.22001	0.0311794
ENSMUSG00000097384,1	Gm26815	lincRNA	1.21983	0.0112487
ENSMUSG00000038146,7	Notch3	protein_coding	1.21965	0.0033585
ENSMUSG00000002210,7	Smg9	protein_coding	1.21964	0.00972397
ENSMUSG00000024958,8	Gpr137	protein_coding	1.2194	0.0280385
ENSMUSG00000030310,8	Slc6a1	protein_coding	1.21868	0.0392561
ENSMUSG00000024666,5	Tmem138	protein_coding	1.21848	0.0162466
ENSMUSG00000059456,9	Ptk2b	protein_coding	1.21822	0.0137218
ENSMUSG00000044037,11	Als2cl	protein_coding	1.21808	0.00144825
ENSMUSG00000012819,11	Cdh23	protein_coding	1.21787	0.00387232
ENSMUSG00000022504,9	Ciita	protein_coding	1.2177	0.0204859
ENSMUSG00000040699,9	Limd2	protein_coding	1.21751	0.0430391
ENSMUSG00000005958,10	Ephb3	protein_coding	1.21743	0.0169455
ENSMUSG00000026417,9	Pigr	protein_coding	1.21712	0.00840832
ENSMUSG00000021097,10	Clmn	protein_coding	1.21665	0.00190497
ENSMUSG00000032818,11	Loxhd1	protein_coding	1.21646	0.00237768
ENSMUSG00000025069,10	Gsto2	protein_coding	1.21587	0.042768
ENSMUSG00000061032,8	Rrp1	protein_coding	1.21537	0.022086
ENSMUSG00000001472,12	Tcf25	protein_coding	1.21527	0.00169167
ENSMUSG00000070495,7	Ctcfl	protein_coding	1.21466	0.0148017
ENSMUSG00000039176,13	Polg	protein_coding	1.21397	0.0154957
ENSMUSG00000006649,12	Nphs1	protein_coding	1.21385	0.0222172
ENSMUSG00000017314,8	Mpp2	protein_coding	1.21367	0.01041
ENSMUSG00000092200,1	Tnxa	unprocessed_pseudogene	1.21333	0.0486469
ENSMUSG00000026841,7	Fibcd1	protein_coding	1.2133	0.0479973
ENSMUSG00000035722,11	Abca7	protein_coding	1.2132	0.00313429
ENSMUSG00000057216,5	Gm10807	unprocessed_pseudogene	1.21205	0.036267
ENSMUSG00000038894,6	Irs2	protein_coding	1.21143	0.0259449
ENSMUSG00000026641,9	Usf1	protein_coding	1.21074	0.0372059
ENSMUSG00000022946,8	Dopey2	protein_coding	1.21045	0.00599934
ENSMUSG00000018669,10	Cdk5rap3	protein_coding	1.21033	0.033462
ENSMUSG00000038534,13	Osbpl7	protein_coding	1.20991	0.00432907
ENSMUSG00000020695,10	Mrc2	protein_coding	1.20969	0.0051932
ENSMUSG00000024732,7	Ccdc86	protein_coding	1.20961	0.00417163
ENSMUSG00000024927,7	Rela	protein_coding	1.20948	0.0317311
ENSMUSG00000020235,12	Fzr1	protein_coding	1.20936	0.00669275
ENSMUSG00000029598,8	Plbd2	protein_coding	1.20912	0.0144687
ENSMUSG00000031865,11	Dctn1	protein_coding	1.20907	0.00173951
ENSMUSG00000009216,7	Fam163b	protein_coding	1.20902	0.040739
ENSMUSG00000022477,8	Aco2	protein_coding	1.20879	0.036672
ENSMUSG00000035314,8	Gdpd5	protein_coding	1.20861	0.0354198
ENSMUSG00000032724,5	Abtb2	protein_coding	1.20837	0.0136969
ENSMUSG00000040035,10	Disp2	protein_coding	1.20825	0.00335492
ENSMUSG00000020412,12	Ascc2	protein_coding	1.20779	0.00322915
ENSMUSG00000029361,14	Nos1	protein_coding	1.20739	0.000632683
ENSMUSG00000036718,13	Micall2	protein_coding	1.2073	0.0315382
ENSMUSG00000034829,7	Nxnl1	protein_coding	1.20679	0.0448791
ENSMUSG00000037509,14	Arhgef4	protein_coding	1.20667	0.0116002
ENSMUSG00000039849,5	Pcif1	protein_coding	1.20607	0.0228393
ENSMUSG00000030653,12	Pde2a	protein_coding	1.20578	0.0151754
ENSMUSG00000052911,5	Lamb2	protein_coding	1.20487	0.00797178
ENSMUSG00000021294,7	Kif26a	protein_coding	1.20454	0.0106335
ENSMUSG00000029009,13	Mthfr	protein_coding	1.20372	0.0162986
ENSMUSG00000047284,10	Neurl4	protein_coding	1.20372	0.00857812
ENSMUSG00000039713,12	Plekhg5	protein_coding	1.20365	0.0209945
ENSMUSG00000016346,13	Kcnq2	protein_coding	1.20311	0.00120975
ENSMUSG00000001750,11	Tcirg1	protein_coding	1.2029	0.0134429
ENSMUSG00000029163,7	Emilin1	protein_coding	1.20184	0.0269556
ENSMUSG00000059022,10	Kcp	protein_coding	1.20162	0.0089963
ENSMUSG00000022421,14	Nptxr	protein_coding	1.20146	0.0300831
ENSMUSG00000047428,10	Dlk2	protein_coding	1.20076	0.0207573
ENSMUSG00000048897,11	Zfp710	protein_coding	1.20017	0.0321733
ENSMUSG00000024892,11	Pcx	protein_coding	1.19883	0.00284222
ENSMUSG00000026926,10	Pmpca	protein_coding	1.19859	0.0415638
ENSMUSG00000020085,11	Aifm2	protein_coding	1.19842	0.0306002
ENSMUSG00000020277,9	Pfkl	protein_coding	1.19829	0.0129471
ENSMUSG00000000247,7	Lhx2	protein_coding	1.19811	0.0439916
ENSMUSG00000035506,12	Slc12a8	protein_coding	1.19789	0.0134797
ENSMUSG00000006675,6	P4htm	protein_coding	1.19732	0.0317429
ENSMUSG00000042492,8	Tbc1d10b	protein_coding	1.19594	0.0139796
ENSMUSG00000026840,10	Lamc3	protein_coding	1.1959	0.0155029
ENSMUSG00000029056,9	Pank4	protein_coding	1.19566	0.0481327
ENSMUSG00000006411,8	Pvrl4	protein_coding	1.19553	0.0432148
ENSMUSG00000038777,15	Sema6c	protein_coding	1.19516	0.0163997
ENSMUSG00000037681,9	Esyt3	protein_coding	1.19466	0.0091449
ENSMUSG00000023262,8	Acy1	protein_coding	1.19354	0.0337096
ENSMUSG00000063415,8	Cyp26b1	protein_coding	1.19353	0.0452882
ENSMUSG00000085601,3	Gm4969	protein_coding	1.19267	0.0364766
ENSMUSG00000033685,8	Ucp2	protein_coding	1.19264	0.0244332
ENSMUSG00000075529,6	BC028471	processed_transcript	1.19257	0.0200573
ENSMUSG00000031853,4	BC021891	protein_coding	1.1907	0.00169887
ENSMUSG00000035697,10	Hmha1	protein_coding	1.18956	0.0336121
ENSMUSG00000001985,9	Grik3	protein_coding	1.18936	0.00959439
ENSMUSG00000024422,10	Dhx16	protein_coding	1.18929	0.00303352
ENSMUSG00000068699,8	Flnc	protein_coding	1.18928	0.00133309
ENSMUSG00000075524,2	4930407I10Rik	protein_coding	1.18897	0.0099954
ENSMUSG00000054134,9	Umodl1	protein_coding	1.18895	0.00825259
ENSMUSG00000016763,10	Scube1	protein_coding	1.18773	0.0161827
ENSMUSG00000000305,8	Cdh4	protein_coding	1.18758	0.00533309
ENSMUSG00000038763,11	Alpk3	protein_coding	1.18636	0.010888
ENSMUSG00000051790,11	Nlgn2	protein_coding	1.18608	0.00997632
ENSMUSG00000025013,10	Tll2	protein_coding	1.18595	0.00464011
ENSMUSG00000100127,2	Gsdmcl-ps	unitary_pseudogene	1.18548	0.0126464
ENSMUSG00000097160,1	A630072L19Rik	lincRNA	1.18488	0.0220222
ENSMUSG00000030982,13	9030624J02Rik	protein_coding	1.18447	0.012942
ENSMUSG00000018126,11	Baiap2l2	protein_coding	1.18302	0.0276961
ENSMUSG00000026837,11	Col5a1	protein_coding	1.18299	0.00170948
ENSMUSG00000039860,15	Srrm3	protein_coding	1.18277	0.0115132
ENSMUSG00000001506,10	Col1a1	protein_coding	1.18177	0.00244396
ENSMUSG00000037306,9	Man1c1	protein_coding	1.18173	0.0491522
ENSMUSG00000024036,11	Slc37a1	protein_coding	1.18101	0.0304855
ENSMUSG00000013236,12	Ptprs	protein_coding	1.18086	0.00315889
ENSMUSG00000054434,10	Tmem120b	protein_coding	1.18079	0.0372608
ENSMUSG00000012123,11	Aim1l	protein_coding	1.18076	0.0235456
ENSMUSG00000059409,8	Ppp2r5d	protein_coding	1.1794	0.0493169
ENSMUSG00000052496,4	Pkdrej	protein_coding	1.17924	0.038975
ENSMUSG00000058498,8	Rnf207	protein_coding	1.17895	0.0240287
ENSMUSG00000007030,4	Vwa7	protein_coding	1.17894	0.0133622
ENSMUSG00000068263,7	Efcc1	protein_coding	1.17889	0.0144623
ENSMUSG00000026814,12	Eng	protein_coding	1.17886	0.0203762
ENSMUSG00000048038,6	4932418E24Rik	protein_coding	1.17875	0.0374027
ENSMUSG00000017631,14	Abr	protein_coding	1.17872	0.00525062
ENSMUSG00000034908,11	Sidt2	protein_coding	1.17853	0.00643358
ENSMUSG00000007097,10	Atp1a2	protein_coding	1.1776	0.00838734
ENSMUSG00000025509,11	Pnpla2	protein_coding	1.17743	0.0493862
ENSMUSG00000028766,6	Alpl	protein_coding	1.17696	0.0277639
ENSMUSG00000034902,13	Pip5k1c	protein_coding	1.17686	0.00291329
ENSMUSG00000006732,10	Mettl1	protein_coding	1.17672	0.0291543
ENSMUSG00000051985,8	Igfn1	protein_coding	1.17644	0.00317632
ENSMUSG00000043460,6	Elfn2	protein_coding	1.17634	0.0334283
ENSMUSG00000031824,10	6430548M08Rik	protein_coding	1.17468	0.00731368
ENSMUSG00000016520,7	Lnx2	protein_coding	1.17421	0.0344277
ENSMUSG00000001027,7	Scn4a	protein_coding	1.17325	0.00583897
ENSMUSG00000052316,9	Lrrc15	protein_coding	1.1727	0.0199578
ENSMUSG00000063564,9	Col23a1	protein_coding	1.17224	0.00368132
ENSMUSG00000058392,8	Rrp1b	protein_coding	1.17167	0.00462399
ENSMUSG00000039463,10	Slc9a8	protein_coding	1.17141	0.00802738
ENSMUSG00000074151,8	Nlrc5	protein_coding	1.17124	0.00121134
ENSMUSG00000042129,6	Rassf4	protein_coding	1.17054	0.0219455
ENSMUSG00000034673,10	Pbx2	protein_coding	1.17052	0.0297858
ENSMUSG00000059406,7	Tmprss9	protein_coding	1.16977	0.0481907
ENSMUSG00000013846,9	St3gal1	protein_coding	1.16926	0.00165054
ENSMUSG00000003051,9	Elf3	protein_coding	1.16884	0.0371483
ENSMUSG00000038437,7	Mllt6	protein_coding	1.16862	0.00953838
ENSMUSG00000033857,8	Engase	protein_coding	1.16843	0.0385087
ENSMUSG00000042678,12	Myo15	protein_coding	1.16834	0.00152175
ENSMUSG00000018476,7	Kdm6b	protein_coding	1.16833	0.0169198
ENSMUSG00000025185,10	Loxl4	protein_coding	1.16802	0.00315618
ENSMUSG00000010311,11	Optc	protein_coding	1.1675	0.0269297
ENSMUSG00000040428,13	Plekha4	protein_coding	1.16734	0.0250153
ENSMUSG00000030200,9	Bcl2l14	protein_coding	1.16706	0.0472565
ENSMUSG00000071715,7	Ncf4	protein_coding	1.16704	0.0490353
ENSMUSG00000060716,6	Plekhh1	protein_coding	1.16617	0.00911659
ENSMUSG00000000409,10	Lck	protein_coding	1.16603	0.0450249
ENSMUSG00000040007,8	Bahd1	protein_coding	1.16584	0.0422455
ENSMUSG00000022562,9	Oplah	protein_coding	1.16571	0.0305986
ENSMUSG00000040543,12	Pitpnm3	protein_coding	1.16539	0.00210391
ENSMUSG00000026930,11	Gpsm1	protein_coding	1.16512	0.0366234
ENSMUSG00000036913,10	Trim67	protein_coding	1.16501	0.000822486
ENSMUSG00000046861,9	Hectd3	protein_coding	1.16456	0.0305715
ENSMUSG00000020888,12	Dvl2	protein_coding	1.16435	0.014995
ENSMUSG00000001034,13	Mapk7	protein_coding	1.16341	0.0482807
ENSMUSG00000021182,10	Ccdc88c	protein_coding	1.16337	0.00391529
ENSMUSG00000020474,7	Polm	protein_coding	1.16214	0.036388
ENSMUSG00000017652,12	Cd40	protein_coding	1.16204	0.0304639
ENSMUSG00000078716,5	Tmem8b	protein_coding	1.16192	0.0205031
ENSMUSG00000039621,9	Prex1	protein_coding	1.16188	0.00384517
ENSMUSG00000036054,11	Sugp2	protein_coding	1.16184	0.000726122
ENSMUSG00000041329,9	Atp1b2	protein_coding	1.16171	0.0114892
ENSMUSG00000060212,9	Pcnxl2	protein_coding	1.16099	0.00171925
ENSMUSG00000037348,11	Paqr7	protein_coding	1.16095	0.0265433
ENSMUSG00000044006,8	Cilp2	protein_coding	1.16085	0.0334283
ENSMUSG00000052819,5	Best2	protein_coding	1.16068	0.0354708
ENSMUSG00000025083,13	Afap1l2	protein_coding	1.16057	0.00533309
ENSMUSG00000036564,12	Ndrg4	protein_coding	1.16009	0.0115455
ENSMUSG00000039963,14	Ccdc40	protein_coding	1.15988	0.00427157
ENSMUSG00000042532,10	Golga7b	protein_coding	1.15967	0.0320354
ENSMUSG00000034616,12	Ssh3	protein_coding	1.15952	0.02174
ENSMUSG00000040010,10	Slc7a5	protein_coding	1.15813	0.0228484
ENSMUSG00000031825,12	Crispld2	protein_coding	1.15783	0.0117199
ENSMUSG00000017167,6	Cntnap1	protein_coding	1.1572	0.0126796
ENSMUSG00000006576,12	Slc4a3	protein_coding	1.15701	0.00486804
ENSMUSG00000018974,3	Sart3	protein_coding	1.1556	0.00667072
ENSMUSG00000020802,8	Ube2o	protein_coding	1.15398	0.013021
ENSMUSG00000039976,3	Tbc1d16	protein_coding	1.15341	0.0175174
ENSMUSG00000026959,9	Grin1	protein_coding	1.15292	0.00519162
ENSMUSG00000038195,6	Rilp	protein_coding	1.15274	0.0466152
ENSMUSG00000068452,7	Duox2	protein_coding	1.15217	0.0120127
ENSMUSG00000048154,12	Kmt2d	protein_coding	1.1518	0.00149556
ENSMUSG00000020538,11	Srebf1	protein_coding	1.15065	0.028842
ENSMUSG00000078700,6	D030028A08Rik	processed_transcript	1.14999	0.0259892
ENSMUSG00000097993,3	Ptprv	processed_transcript	1.14988	0.00715716
ENSMUSG00000022220,9	Adcy4	protein_coding	1.14865	0.0275467
ENSMUSG00000006019,11	Dhx34	protein_coding	1.14805	0.0336892
ENSMUSG00000029577,9	Ube3b	protein_coding	1.14776	0.00400988
ENSMUSG00000034911,7	Ushbp1	protein_coding	1.14774	0.0277139
ENSMUSG00000043740,10	B430306N03Rik	protein_coding	1.14699	0.0174664
ENSMUSG00000032609,8	Klhdc8b	protein_coding	1.14664	0.0137466
ENSMUSG00000004099,11	Dnmt1	protein_coding	1.14596	0.00192526
ENSMUSG00000000730,9	Dnmt3l	protein_coding	1.14457	0.0283465
ENSMUSG00000038593,14	Tctn1	protein_coding	1.14413	0.0282965
ENSMUSG00000017830,11	Dhx58	protein_coding	1.14413	0.0456472
ENSMUSG00000039307,12	Hexdc	protein_coding	1.1438	0.0452318
ENSMUSG00000085272,3	Sbk3	protein_coding	1.14366	0.0134797
ENSMUSG00000024140,9	Epas1	protein_coding	1.14311	0.0280034
ENSMUSG00000044788,10	Fads6	protein_coding	1.14291	0.0162986
ENSMUSG00000018983,9	E2f2	protein_coding	1.14272	0.0355322
ENSMUSG00000021136,9	Smoc1	protein_coding	1.14252	0.043062
ENSMUSG00000073889,6	Il11ra1	protein_coding	1.14238	0.0346626
ENSMUSG00000020537,5	Drg2	protein_coding	1.14225	0.0124608
ENSMUSG00000059981,7	Taok2	protein_coding	1.142	0.00488133
ENSMUSG00000004113,14	Cacna1b	protein_coding	1.14172	0.00369602
ENSMUSG00000043587,11	Pxylp1	protein_coding	1.14168	0.0391747
ENSMUSG00000020439,13	Smtn	protein_coding	1.1413	0.0177607
ENSMUSG00000075028,7	Prdm11	protein_coding	1.14073	0.00558627
ENSMUSG00000020917,13	Acly	protein_coding	1.14065	0.00523054
ENSMUSG00000085925,2	Rtl1	protein_coding	1.1403	0.00403558
ENSMUSG00000041037,7	Irgq	protein_coding	1.13988	0.0384696
ENSMUSG00000038765,9	Lmx1b	protein_coding	1.13961	0.0321034
ENSMUSG00000059939,9	9430015G10Rik	protein_coding	1.13933	0.0298326
ENSMUSG00000033249,6	Hsf4	protein_coding	1.13892	0.0419976
ENSMUSG00000036545,8	Adamts2	protein_coding	1.13887	0.00937178
ENSMUSG00000017747,9	Ghdc	protein_coding	1.13796	0.0420022
ENSMUSG00000056493,8	Foxk1	protein_coding	1.13779	0.00870103
ENSMUSG00000034037,10	Fgd5	protein_coding	1.13765	0.0100099
ENSMUSG00000022568,12	Scrib	protein_coding	1.13749	0.00672311
ENSMUSG00000020042,11	Btbd11	protein_coding	1.13709	0.00674065
ENSMUSG00000051984,9	Sec31b	protein_coding	1.13687	0.0112259
ENSMUSG00000103984,1	RP24-286D13,3	TEC	1.13638	0.0242858
ENSMUSG00000036270,12	Edc4	protein_coding	1.13615	0.0177691
ENSMUSG00000000884,12	Gnb1l	protein_coding	1.13584	0.0439916
ENSMUSG00000023795,12	Pisd-ps2	transcribed_unprocessed_pseudogene	1.13455	0.00325529
ENSMUSG00000020451,13	Limk2	protein_coding	1.13321	0.00319855
ENSMUSG00000038260,9	Trpm4	protein_coding	1.13294	0.00948583
ENSMUSG00000028358,11	Zfp618	protein_coding	1.13254	0.0155029
ENSMUSG00000025533,11	Asl	protein_coding	1.13187	0.0273631
ENSMUSG00000086425,3	F730016J06Rik	lincRNA	1.13036	0.0218681
ENSMUSG00000048699,4	4732456N10Rik	protein_coding	1.13032	0.0380187
ENSMUSG00000036306,7	Lzts1	protein_coding	1.12955	0.0116978
ENSMUSG00000038976,8	Ppp1r9b	protein_coding	1.12943	0.00611711
ENSMUSG00000024163,13	Mapk8ip3	protein_coding	1.12934	0.00738734
ENSMUSG00000003352,9	Cacnb3	protein_coding	1.1292	0.0190722
ENSMUSG00000097727,3	F630040K05Rik	lincRNA	1.12919	0.0449173
ENSMUSG00000062372,9	Otof	protein_coding	1.12909	0.00118161
ENSMUSG00000039741,11	Bahcc1	protein_coding	1.12863	0.00235369
ENSMUSG00000020744,9	Slc25a19	protein_coding	1.12846	0.02785
ENSMUSG00000053693,12	Mast1	protein_coding	1.1279	0.00643353
ENSMUSG00000031506,7	Ptpn7	protein_coding	1.12785	0.00770453
ENSMUSG00000018861,4	Fdxr	protein_coding	1.1276	0.0326574
ENSMUSG00000021819,10	Zswim8	protein_coding	1.12711	0.00745981
ENSMUSG00000038807,13	Rap1gap2	protein_coding	1.12675	0.00349804
ENSMUSG00000021281,11	Tnfaip2	protein_coding	1.12557	0.0309788
ENSMUSG00000032514,7	Ttc21a	protein_coding	1.12544	0.00811824
ENSMUSG00000055333,10	Fat2	protein_coding	1.12476	0.000846412
ENSMUSG00000035041,8	Creb3l3	protein_coding	1.12419	0.0359987
ENSMUSG00000024901,10	Peli3	protein_coding	1.12356	0.0189151
ENSMUSG00000052142,11	Rasal3	protein_coding	1.12355	0.0278779
ENSMUSG00000035569,12	Ankrd11	protein_coding	1.12267	0.0016793
ENSMUSG00000031748,11	Gnao1	protein_coding	1.12152	0.00993839
ENSMUSG00000004846,6	Plod3	protein_coding	1.12129	0.0285338
ENSMUSG00000023951,12	Vegfa	protein_coding	1.12105	0.0151098
ENSMUSG00000024773,10	Atg2a	protein_coding	1.12062	0.000906403
ENSMUSG00000033498,10	Strc	protein_coding	1.12034	0.00725009
ENSMUSG00000000555,6	Itga5	protein_coding	1.12015	0.0181182
ENSMUSG00000017756,8	Slc12a7	protein_coding	1.12009	0.0115455
ENSMUSG00000063160,8	Numbl	protein_coding	1.11913	0.0224333
ENSMUSG00000045374,14	Wdr81	protein_coding	1.11902	0.0175889
ENSMUSG00000055235,7	Wdr86	protein_coding	1.11809	0.0340127
ENSMUSG00000049643,11	2310022A10Rik	protein_coding	1.11808	0.0292218
ENSMUSG00000018906,10	P4ha2	protein_coding	1.11742	0.0262995
ENSMUSG00000001119,7	Col6a1	protein_coding	1.1174	0.00982918
ENSMUSG00000006676,12	Usp19	protein_coding	1.11736	0.00909951
ENSMUSG00000030088,11	Aldh1l1	protein_coding	1.11725	0.0388203
ENSMUSG00000028664,10	Ephb2	protein_coding	1.11707	0.00757383
ENSMUSG00000034818,12	Celf5	protein_coding	1.11696	0.0111089
ENSMUSG00000068663,9	Clec16a	protein_coding	1.11649	0.00339156
ENSMUSG00000002668,7	Dennd1c	protein_coding	1.11633	0.0213166
ENSMUSG00000024858,9	Adrbk1	protein_coding	1.11602	0.00488133
ENSMUSG00000022483,12	Col2a1	protein_coding	1.11549	0.00562157
ENSMUSG00000002963,12	Pnkp	protein_coding	1.11539	0.0487757
ENSMUSG00000009487,9	Otog	protein_coding	1.11519	0.00405918
ENSMUSG00000026858,14	Fam73b	protein_coding	1.11513	0.0320723
ENSMUSG00000024150,7	Mcfd2	protein_coding	1.11505	0.0498217
ENSMUSG00000023452,14	Pisd	protein_coding	1.11455	0.0373911
ENSMUSG00000062157,6	Ifnlr1	protein_coding	1.11425	0.0461713
ENSMUSG00000007783,9	Cpt1c	protein_coding	1.11374	0.0145292
ENSMUSG00000006276,9	Eps15l1	protein_coding	1.11241	0.0149907
ENSMUSG00000001943,7	Vsig2	protein_coding	1.11188	0.0240327
ENSMUSG00000020901,9	Pik3r5	protein_coding	1.11095	0.00360391
ENSMUSG00000046658,12	Zfp316	protein_coding	1.11081	0.0189481
ENSMUSG00000008496,14	Pou2f2	protein_coding	1.11035	0.0344587
ENSMUSG00000016179,7	Camk1g	protein_coding	1.11008	0.040739
ENSMUSG00000031385,10	Plxnb3	protein_coding	1.10812	0.045731
ENSMUSG00000032815,11	Fanca	protein_coding	1.10782	0.00415452
ENSMUSG00000018428,11	Akap1	protein_coding	1.1076	0.00851177
ENSMUSG00000022102,9	Dok2	protein_coding	1.10723	0.0385536
ENSMUSG00000039244,6	E130309D02Rik	protein_coding	1.10643	0.0373369
ENSMUSG00000026811,14	St6galnac6	protein_coding	1.10635	0.0461972
ENSMUSG00000056698,7	Elmod3	protein_coding	1.10632	0.0395293
ENSMUSG00000043705,6	Capn13	protein_coding	1.10626	0.0324747
ENSMUSG00000033159,10	Cnppd1	protein_coding	1.10609	0.0137447
ENSMUSG00000033722,5	BC034090	protein_coding	1.1059	0.036115
ENSMUSG00000036966,11	Spryd3	protein_coding	1.10468	0.0307213
ENSMUSG00000048191,11	Muc6	protein_coding	1.10468	0.00301703
ENSMUSG00000037541,15	Shank2	protein_coding	1.10382	0.0086936
ENSMUSG00000023988,8	Bysl	protein_coding	1.10341	0.0118601
ENSMUSG00000040940,14	Arhgef1	protein_coding	1.10267	0.0100525
ENSMUSG00000024959,9	Bad	protein_coding	1.10244	0.0360447
ENSMUSG00000023992,10	Trem2	protein_coding	1.102	0.0290603
ENSMUSG00000031786,6	Drc7	protein_coding	1.10165	0.0277639
ENSMUSG00000031450,7	Grk1	protein_coding	1.10134	0.00540052
ENSMUSG00000029564,8	4930519G04Rik	protein_coding	1.10107	0.0391817
ENSMUSG00000079091,1	Gm3404	protein_coding	1.10045	0.0382176
ENSMUSG00000025582,4	Nptx1	protein_coding	1.10041	0.0109368
ENSMUSG00000001524,10	Gtf2h4	protein_coding	1.10015	0.0238965
ENSMUSG00000034312,9	Iqsec1	protein_coding	1.09836	0.00909289
ENSMUSG00000029074,10	Ttll10	protein_coding	1.09793	0.0499793
ENSMUSG00000025092,6	Hspa12a	protein_coding	1.09777	0.00776075
ENSMUSG00000021460,12	Auh	protein_coding	1.09747	0.00909713
ENSMUSG00000004098,7	Col5a3	protein_coding	1.09662	0.00348821
ENSMUSG00000047787,7	Flrt1	protein_coding	1.09635	0.0304037
ENSMUSG00000066036,10	Ubr4	protein_coding	1.09625	0.00158347
ENSMUSG00000024826,10	Dpf2	protein_coding	1.09594	0.00248162
ENSMUSG00000028841,10	Cnksr1	protein_coding	1.09576	0.0468794
ENSMUSG00000046761,8	Fam83h	protein_coding	1.09527	0.00620592
ENSMUSG00000025650,8	Col7a1	protein_coding	1.09516	0.00294661
ENSMUSG00000024369,12	Nelfe	protein_coding	1.09515	0.0443496
ENSMUSG00000034675,13	Dbn1	protein_coding	1.09496	0.0156199
ENSMUSG00000024319,13	Vps52	protein_coding	1.0946	0.0473454
ENSMUSG00000009681,9	Bcr	protein_coding	1.09172	0.00381208
ENSMUSG00000028763,13	Hspg2	protein_coding	1.09127	0.00144825
ENSMUSG00000026854,12	Usp20	protein_coding	1.09011	0.00650369
ENSMUSG00000029122,7	Evc	protein_coding	1.08988	0.0125547
ENSMUSG00000031453,11	Rasa3	protein_coding	1.08979	0.00551027
ENSMUSG00000029592,7	Usp30	protein_coding	1.08818	0.0221828
ENSMUSG00000040761,12	Spen	protein_coding	1.0877	0.00521613
ENSMUSG00000041605,12	5730559C18Rik	protein_coding	1.0865	0.0451233
ENSMUSG00000020770,9	Unk	protein_coding	1.08617	0.0173011
ENSMUSG00000055491,9	Pprc1	protein_coding	1.0849	0.00425601
ENSMUSG00000026821,11	Ralgds	protein_coding	1.08467	0.022483
ENSMUSG00000017221,10	Psmd3	protein_coding	1.08454	0.0377802
ENSMUSG00000021901,6	Bap1	protein_coding	1.08388	0.0313924
ENSMUSG00000020865,12	Abcc3	protein_coding	1.08388	0.0070709
ENSMUSG00000015980,10	Lrrc27	protein_coding	1.08369	0.04556
ENSMUSG00000024621,11	Csf1r	protein_coding	1.08365	0.0499183
ENSMUSG00000024830,12	Rps6kb2	protein_coding	1.08363	0.0307524
ENSMUSG00000029710,11	Ephb4	protein_coding	1.08294	0.0156205
ENSMUSG00000087111,1	Gm11399	antisense	1.08291	0.00325529
ENSMUSG00000022382,10	Wnt7b	protein_coding	1.08254	0.0490616
ENSMUSG00000030930,9	Chst15	protein_coding	1.08158	0.0453942
ENSMUSG00000013338,12	Fer1l4	protein_coding	1.08154	0.00609099
ENSMUSG00000017210,10	Med24	protein_coding	1.08072	0.00635382
ENSMUSG00000021978,8	Extl3	protein_coding	1.07989	0.0482807
ENSMUSG00000060862,9	Zbtb40	protein_coding	1.07977	0.0100199
ENSMUSG00000020156,12	Mum1	protein_coding	1.07976	0.012652
ENSMUSG00000061689,11	Dlgap4	protein_coding	1.07917	0.0211287
ENSMUSG00000034413,10	Neurl1b	protein_coding	1.07866	0.0430955
ENSMUSG00000042766,13	Trim46	protein_coding	1.07859	0.0372053
ENSMUSG00000023495,8	Pcbp4	protein_coding	1.07843	0.0259268
ENSMUSG00000021948,11	Prkcd	protein_coding	1.07798	0.03748
ENSMUSG00000022840,8	Adcy5	protein_coding	1.07738	0.0173011
ENSMUSG00000021763,12	BC067074	protein_coding	1.07712	0.0265433
ENSMUSG00000026875,10	Traf1	protein_coding	1.07709	0.0385088
ENSMUSG00000024201,8	Kdm4b	protein_coding	1.0744	0.0105642
ENSMUSG00000028804,14	Csmd2	protein_coding	1.07358	0.0019563
ENSMUSG00000036620,10	Mgat4b	protein_coding	1.07336	0.0419976
ENSMUSG00000034706,12	Dnaic2	protein_coding	1.07329	0.0232018
ENSMUSG00000029675,9	Eln	protein_coding	1.07177	0.0272197
ENSMUSG00000057530,10	Ece1	protein_coding	1.07157	0.0229383
ENSMUSG00000021565,12	Slc6a19	protein_coding	1.07108	0.0481907
ENSMUSG00000038855,10	Itpkb	protein_coding	1.0701	0.00750007
[truncated: 120 more rows]

## Sheet: Sheet_b
RNAs overexpressed in EVs from 4T1 shRalA cells Vs EVs from shCtl cells (padj<0,05; Log2FC>1)
RNA ID	symbol	genetype	log2FoldChange	padj
ENSMUSG00000064746,1	Gm24707	snRNA	5.0118	8.52615e-12
ENSMUSG00000102719,1	RP24-273P12,4	TEC	4.9725	3.4255e-34
ENSMUSG00000094377,1	Gm24407	snRNA	4.80326	8.52615e-12
ENSMUSG00000065042,1	Gm24043	snRNA	4.76071	5.35959e-12
ENSMUSG00000064637,1	Snora20	snoRNA	4.09771	5.62444e-07
ENSMUSG00000065097,1	Snora16a	snoRNA	3.87227	3.73318e-06
ENSMUSG00000064755,1	Gm26328	snRNA	3.80208	1.71449e-06
ENSMUSG00000094830,1	n-R5s194	rRNA	3.6405	1.03843e-09
ENSMUSG00000065822,1	Snord15a	snoRNA	3.5794	9.50841e-07
ENSMUSG00000064899,1	Snord118	snoRNA	3.55512	1.22245e-05
ENSMUSG00000094703,1	Gm24486	snRNA	3.48882	4.11995e-05
ENSMUSG00000085718,2	Rpl9-ps3	processed_pseudogene	3.47815	4.49076e-06
ENSMUSG00000096211,1	Gm23330	snRNA	3.42103	1.42481e-05
ENSMUSG00000064451,1	Snora23	snoRNA	3.41126	3.61383e-05
ENSMUSG00000096206,1	Gm22317	snRNA	3.37716	3.45496e-06
ENSMUSG00000064841,1	Gm26205	snoRNA	3.37079	5.60824e-05
ENSMUSG00000065662,1	n-R5s161	rRNA	3.36306	5.56087e-06
ENSMUSG00000075760,1	Gm25414	snRNA	3.35864	3.46483e-06
ENSMUSG00000064714,1	n-R5s62	rRNA	3.30366	5.60824e-05
ENSMUSG00000065845,1	Gm25189	snRNA	3.30105	5.62298e-05
ENSMUSG00000070063,1	Snora33	snoRNA	3.257	0.000143001
ENSMUSG00000100215,1	Gm8292	processed_pseudogene	3.23983	1.63344e-06
ENSMUSG00000064967,1	Gm24405	snRNA	3.23175	0.000123652
ENSMUSG00000095580,1	Rnu1b1	snRNA	3.19998	1.27519e-10
ENSMUSG00000064626,1	Gm22306	snRNA	3.18261	0.00016785
ENSMUSG00000064857,1	n-R5s25	rRNA	3.1773	3.73318e-06
ENSMUSG00000064400,2	Gm23927	snoRNA	3.13798	3.99587e-05
ENSMUSG00000095892,1	Rnu5g	snRNA	3.12739	0.000184553
ENSMUSG00000084050,3	Gm14439	processed_pseudogene	3.11343	3.73163e-05
ENSMUSG00000065282,1	Gm24455	snoRNA	3.11034	0.000242324
ENSMUSG00000098973,1	Mir6236	miRNA	3.05428	5.93684e-06
ENSMUSG00000094963,1	Gm22418	snRNA	3.02521	0.000505401
ENSMUSG00000064548,1	n-R5s65	rRNA	3.00721	3.80076e-05
ENSMUSG00000064943,1	Gm23240	snRNA	2.99396	4.08232e-05
ENSMUSG00000065773,1	Rnu1b6	snRNA	2.98783	1.50849e-05
ENSMUSG00000065251,1	Gm23971	snRNA	2.98724	7.62603e-05
ENSMUSG00000086324,4	Gm15564	antisense	2.9538	4.97459e-06
ENSMUSG00000035202,7	Lars2	protein_coding	2.95359	3.05128e-06
ENSMUSG00000092636,1	Gm26381	rRNA	2.93795	0.000428691
ENSMUSG00000096659,1	Gm25679	snRNA	2.9224	0.000238151
ENSMUSG00000094551,1	Gm22392	snRNA	2.916	9.51288e-05
ENSMUSG00000065870,2	Rnu3a	snoRNA	2.91271	1.22245e-05
ENSMUSG00000065102,1	n-R5s50	rRNA	2.90833	0.000224006
ENSMUSG00000084480,1	n-R5s155	rRNA	2.90334	0.00016785
ENSMUSG00000065104,1	Gm26128	snRNA	2.84679	0.00102938
ENSMUSG00000095944,1	n-R5s210	rRNA	2.84156	0.000316188
ENSMUSG00000082023,3	Gm14407	processed_pseudogene	2.82025	0.000616542
ENSMUSG00000087943,1	Gm24245	miRNA	2.81121	7.22632e-05
ENSMUSG00000065876,1	Gm25682	snRNA	2.78608	0.000457082
ENSMUSG00000082697,1	Gm12913	processed_pseudogene	2.78404	0.00016781
ENSMUSG00000095969,1	Rnu1a1	snRNA	2.77941	0.000855482
ENSMUSG00000094178,1	n-R5s118	rRNA	2.77625	0.000306231
ENSMUSG00000065176,1	Rnu12	snRNA	2.77536	1.22245e-05
ENSMUSG00000093956,1	Gm24497	snRNA	2.76574	0.00139093
ENSMUSG00000065893,1	n-R5s151	rRNA	2.74835	0.000626396
ENSMUSG00000095610,1	Gm26245	snRNA	2.73822	0.00182268
ENSMUSG00000022366,8	Slc22a22	protein_coding	2.73511	2.76836e-05
ENSMUSG00000102236,1	RP23-109O14,1	TEC	2.73436	0.00147458
ENSMUSG00000096205,1	Gm22068	snRNA	2.72169	6.45234e-07
ENSMUSG00000094405,1	Gm23143	snRNA	2.70984	0.000410356
ENSMUSG00000065107,1	n-R5s88	rRNA	2.70868	0.000528743
ENSMUSG00000057036,7	Gm7536	processed_pseudogene	2.7013	1.86411e-05
ENSMUSG00000093834,1	Rnu1b2	snRNA	2.70101	0.000527036
ENSMUSG00000062742,3	Gm5239	protein_coding	2.69904	8.47277e-05
ENSMUSG00000064617,1	n-R5s176	rRNA	2.69666	0.0012329
ENSMUSG00000064455,1	n-R5s56	rRNA	2.66834	0.000215068
ENSMUSG00000098877,1	Gm27959	rRNA	2.65114	1.78091e-10
ENSMUSG00000083365,1	Gm12895	processed_pseudogene	2.63729	0.00084923
ENSMUSG00000064853,1	Gm23442	snoRNA	2.63397	0.000354254
ENSMUSG00000064355,1	mt-Tk	Mt_tRNA	2.63017	0.00294661
ENSMUSG00000064906,1	n-R5s204	rRNA	2.62479	0.0019907
ENSMUSG00000096785,1	n-R5s130	rRNA	2.62041	0.00148831
ENSMUSG00000064409,1	n-R5s40	rRNA	2.58462	0.000349066
ENSMUSG00000084258,1	Gm12054	processed_pseudogene	2.58187	0.00315698
ENSMUSG00000062611,4	Rps3a2	processed_pseudogene	2.57012	0.000234649
ENSMUSG00000092188,1	Gm20471	antisense	2.55959	0.00118625
ENSMUSG00000096147,1	Gm25818	snRNA	2.55749	0.0038358
ENSMUSG00000096092,1	n-R5s125	rRNA	2.52619	1.73781e-06
ENSMUSG00000065311,1	n-R5s156	rRNA	2.52382	6.03349e-06
ENSMUSG00000075918,1	n-R5s2	rRNA	2.51914	0.000901052
ENSMUSG00000065018,1	Gm23511	snRNA	2.51307	0.00219329
ENSMUSG00000081565,1	Rps12-ps5	processed_pseudogene	2.50644	0.00384741
ENSMUSG00000081695,1	Rpsa-ps5	processed_pseudogene	2.5061	0.000310635
ENSMUSG00000026824,7	Kcnj3	protein_coding	2.49785	0.000732864
ENSMUSG00000095590,1	Gm24305	snRNA	2.45712	0.0017921
ENSMUSG00000096280,1	Gm23287	snRNA	2.44006	0.00507712
ENSMUSG00000098060,1	Gm4842	processed_pseudogene	2.42679	0.00547173
ENSMUSG00000099330,1	Mir7053	miRNA	2.42484	0.00553898
ENSMUSG00000064856,1	Gm23444	snRNA	2.42195	0.00340628
ENSMUSG00000024771,6	Lipk	protein_coding	2.41505	0.000429634
ENSMUSG00000008604,7	Ubqln4	protein_coding	2.40779	3.28939e-10
ENSMUSG00000076939,1	Iglv3	IG_LV_gene	2.39387	0.00507712
ENSMUSG00000065721,1	Gm26168	misc_RNA	2.38351	0.004527
ENSMUSG00000034774,6	Dsg1c	protein_coding	2.37951	9.57453e-05
ENSMUSG00000065055,1	n-R5s213	rRNA	2.3788	0.00384741
ENSMUSG00000065824,1	Gm26315	misc_RNA	2.357	0.00336738
ENSMUSG00000092201,3	A530058N18Rik	processed_transcript	2.3541	0.00757611
ENSMUSG00000078599,5	Skint8	protein_coding	2.34841	0.00151334
ENSMUSG00000043889,5	Gm8399	pseudogene	2.34296	0.00013263
ENSMUSG00000039630,9	Hnrnpu	protein_coding	2.33428	0.000411003
ENSMUSG00000064432,1	Gm25587	snRNA	2.32229	0.0051932
ENSMUSG00000072940,5	Gm10443	processed_pseudogene	2.31244	0.00233039
ENSMUSG00000088088,1	Rmrp	misc_RNA	2.30139	0.000501977
ENSMUSG00000035448,8	Ccr3	protein_coding	2.29745	0.00085257
ENSMUSG00000089764,1	Gm16580	processed_pseudogene	2.28983	5.56087e-06
ENSMUSG00000085638,1	Gm15521	sense_intronic	2.28529	0.00528499
ENSMUSG00000085765,1	Gm12333	antisense	2.28135	0.00631963
ENSMUSG00000094970,1	Olfr943	protein_coding	2.2781	0.000201495
ENSMUSG00000097378,3	B230208H11Rik	lincRNA	2.27675	8.42092e-07
ENSMUSG00000074946,3	Olfr1313	protein_coding	2.27154	0.00670794
ENSMUSG00000103105,1	RP23-436K7,2	transcribed_unprocessed_pseudogene	2.26604	0.0017921
ENSMUSG00000091421,3	Gm4202	processed_pseudogene	2.26586	0.00391567
ENSMUSG00000085264,1	Gm15581	antisense	2.26526	0.00155279
ENSMUSG00000102950,1	RP23-73N8,2	TEC	2.25133	0.00175945
ENSMUSG00000094812,1	Gm22614	snRNA	2.23737	0.0102233
ENSMUSG00000053332,9	Gas5	processed_transcript	2.23337	0.00284222
ENSMUSG00000069476,9	Zfp616	protein_coding	2.22412	0.00338079
ENSMUSG00000080542,1	Gm22710	snRNA	2.21634	0.00382198
ENSMUSG00000034028,11	Cd226	protein_coding	2.2147	0.0110936
ENSMUSG00000049164,6	Zfp518a	protein_coding	2.2117	4.59635e-05
ENSMUSG00000089706,3	B230216N24Rik	processed_transcript	2.2065	0.000211772
ENSMUSG00000027445,3	Cst9	protein_coding	2.20477	0.0110521
ENSMUSG00000092032,1	Vmn2r59	protein_coding	2.19744	0.00923448
ENSMUSG00000017418,9	Arl5b	protein_coding	2.19648	1.55552e-05
ENSMUSG00000099291,1	Rnu3b3	snoRNA	2.18825	0.00361474
ENSMUSG00000094655,1	Gm25360	snRNA	2.18643	0.00218566
ENSMUSG00000092730,1	Snora24	snoRNA	2.18642	0.0111241
ENSMUSG00000020521,7	Rnft1	protein_coding	2.18505	0.000341226
ENSMUSG00000084111,4	Gm15710	processed_pseudogene	2.17872	0.00287019
ENSMUSG00000080006,4	Rps19-ps7	processed_pseudogene	2.17822	0.00813229
ENSMUSG00000062284,4	Gm6030	processed_pseudogene	2.16472	0.00582081
ENSMUSG00000040370,9	Lyrm5	protein_coding	2.15776	0.00895281
ENSMUSG00000098178,1	Yam1	lincRNA	2.15331	0.00159285
ENSMUSG00000096436,1	Olfr1437	protein_coding	2.1493	0.0103341
ENSMUSG00000031274,12	Col4a5	protein_coding	2.14816	0.00016785
ENSMUSG00000044022,5	Pcdhb21	protein_coding	2.14657	0.00531975
ENSMUSG00000089827,1	1700023H06Rik	processed_transcript	2.14646	0.0147448
ENSMUSG00000097051,1	Gm26836	lincRNA	2.1454	0.00921189
ENSMUSG00000056023,3	Gm9989	processed_transcript	2.13982	0.00415359
ENSMUSG00000039001,8	Rps21	protein_coding	2.1279	0.00401684
ENSMUSG00000074882,3	Cyp2c68	protein_coding	2.11665	0.0067027
ENSMUSG00000026058,7	Khdrbs2	protein_coding	2.11232	0.00016785
ENSMUSG00000086592,1	Gm12682	antisense	2.09814	0.00909713
ENSMUSG00000070313,4	A630095E13Rik	protein_coding	2.09399	0.000139952
ENSMUSG00000065701,1	Rny1	misc_RNA	2.09395	0.0115132
ENSMUSG00000030942,7	Thumpd1	protein_coding	2.09044	0.00208152
ENSMUSG00000020561,7	Twistnb	protein_coding	2.08963	0.00131097
ENSMUSG00000031167,12	Rbm3	protein_coding	2.0884	0.00415213
ENSMUSG00000057037,8	Cfhr1	protein_coding	2.0884	0.00670794
ENSMUSG00000089255,1	Snora78	snoRNA	2.08488	0.0155029
ENSMUSG00000025290,12	Rps24	protein_coding	2.08007	0.000547498
ENSMUSG00000029780,10	Nt5c3	protein_coding	2.07803	0.00178734
ENSMUSG00000039653,5	Baat	protein_coding	2.07646	0.010082
ENSMUSG00000092204,1	Vmn2r-ps49	unprocessed_pseudogene	2.07599	0.0115455
ENSMUSG00000089213,1	Gm23388	miRNA	2.07483	0.0201102
ENSMUSG00000042363,10	Lgalsl	protein_coding	2.06985	0.00191794
ENSMUSG00000050015,2	Olfr350	protein_coding	2.06863	0.0107645
ENSMUSG00000075143,3	Olfr1157	protein_coding	2.06622	0.0151925
ENSMUSG00000104078,1	RP23-16D16,4	TEC	2.06392	0.00811824
ENSMUSG00000095248,1	Olfr681	protein_coding	2.06214	0.0200922
ENSMUSG00000077714,1	Snord17	snoRNA	2.06079	0.00829135
ENSMUSG00000055099,3	Gm9966	protein_coding	2.06076	0.0126864
ENSMUSG00000035349,5	Mia2	protein_coding	2.06023	0.0026753
ENSMUSG00000063063,8	Ctnna2	protein_coding	2.05713	5.05e-05
ENSMUSG00000087112,1	Gm7237	lincRNA	2.04465	0.00911659
ENSMUSG00000083864,1	Gm13719	processed_pseudogene	2.03992	0.0173341
ENSMUSG00000093650,2	Gm20631	antisense	2.03872	0.000485199
ENSMUSG00000102401,1	RP24-323I23,1	sense_intronic	2.03699	0.00522332
ENSMUSG00000094976,1	Gm25257	snRNA	2.03652	0.0255813
ENSMUSG00000097443,1	Gm17529	lincRNA	2.03575	0.00800628
ENSMUSG00000033538,9	Casp4	protein_coding	2.03533	0.00784892
ENSMUSG00000098343,1	Mir6240	miRNA	2.03059	0.0135203
ENSMUSG00000026650,11	Meig1	protein_coding	2.02954	0.00126357
ENSMUSG00000026149,2	Tm4sf20	protein_coding	2.02733	0.0163078
ENSMUSG00000035293,9	G2e3	protein_coding	2.0273	0.00717233
ENSMUSG00000025903,10	Lypla1	protein_coding	2.02213	0.000712925
ENSMUSG00000026728,5	Vim	protein_coding	2.01847	2.04046e-07
ENSMUSG00000058809,8	Gm12141	processed_pseudogene	2.01533	0.00916434
ENSMUSG00000024259,8	Slc25a46	protein_coding	2.01186	0.00401592
ENSMUSG00000094764,1	Olfr346	protein_coding	2.00578	0.0169192
ENSMUSG00000070178,1	n-R5s71	rRNA	2.00438	0.018919
ENSMUSG00000068240,5	Gm11808	protein_coding	2.00419	0.00801831
ENSMUSG00000091572,4	Vmn2r3	protein_coding	2.00061	0.0251093
ENSMUSG00000038257,8	Glra3	protein_coding	2.00022	0.000694675
ENSMUSG00000084268,3	Olfr1291-ps1	processed_pseudogene	1.99916	0.0224106
ENSMUSG00000081427,1	Gm12382	processed_pseudogene	1.99803	0.0140144
ENSMUSG00000094597,1	Gm4810	processed_pseudogene	1.9967	0.0173443
ENSMUSG00000080907,1	4930455H04Rik	protein_coding	1.99499	0.0132668
ENSMUSG00000020332,7	4930404A10Rik	protein_coding	1.99246	0.00654895
ENSMUSG00000070866,4	Zfp804a	protein_coding	1.9924	0.00381208
ENSMUSG00000061958,5	Gm14851	protein_coding	1.99046	0.00369602
ENSMUSG00000069307,5	Hist1h2bq	protein_coding	1.98732	0.00404891
ENSMUSG00000019785,9	Clvs2	protein_coding	1.98699	0.000446074
ENSMUSG00000081884,1	Gm11821	processed_pseudogene	1.98281	0.0122933
ENSMUSG00000057067,3	Olfr297	protein_coding	1.9805	0.0283384
ENSMUSG00000070225,1	n-R5s33	rRNA	1.9791	0.00857706
ENSMUSG00000019877,6	Serinc1	protein_coding	1.97835	0.00210725
ENSMUSG00000031201,13	Brcc3	protein_coding	1.97662	0.00367525
ENSMUSG00000095294,1	Gm21119	protein_coding	1.97659	0.00212279
ENSMUSG00000084588,1	n-R5s68	rRNA	1.9763	0.0226449
ENSMUSG00000055839,5	Tceb2	protein_coding	1.97236	0.0161939
ENSMUSG00000102569,1	RP24-535F16,1	lincRNA	1.96979	0.0150184
ENSMUSG00000080985,1	Gm13559	processed_pseudogene	1.96949	0.0177691
ENSMUSG00000024683,5	Mrpl16	protein_coding	1.969	0.0171012
ENSMUSG00000045581,5	Olfr710	protein_coding	1.96651	0.0207359
ENSMUSG00000027965,11	Olfm3	protein_coding	1.9657	0.00533309
ENSMUSG00000065236,1	n-R5s197	rRNA	1.96495	0.00335492
ENSMUSG00000070677,5	D5Ertd577e	protein_coding	1.96448	0.0228484
ENSMUSG00000077394,1	Gm24339	snoRNA	1.96359	0.0091449
ENSMUSG00000071340,1	Trappc3l	protein_coding	1.96136	0.0121049
ENSMUSG00000103762,1	RP24-168F13,1	TEC	1.96106	0.00631963
ENSMUSG00000045763,7	Basp1	protein_coding	1.96088	0.000184553
ENSMUSG00000057444,2	Olfr910	protein_coding	1.96072	0.0111417
ENSMUSG00000094265,1	n-R5s109	rRNA	1.95962	0.0162663
ENSMUSG00000025817,8	Nudt5	protein_coding	1.95756	4.49076e-06
ENSMUSG00000074832,6	2410141K09Rik	protein_coding	1.95756	0.000268929
ENSMUSG00000030237,10	Slco1a4	protein_coding	1.9554	0.00533309
ENSMUSG00000028693,11	Nasp	protein_coding	1.95361	1.19965e-06
ENSMUSG00000021302,9	Ggps1	protein_coding	1.95303	0.015407
ENSMUSG00000103914,1	RP23-256H11,1	TEC	1.9512	0.000943839
ENSMUSG00000096958,1	Gm26573	lincRNA	1.95069	0.00159857
ENSMUSG00000075198,1	Olfr1045	protein_coding	1.94754	0.0154957
ENSMUSG00000079435,5	Rpl36a	protein_coding	1.94722	0.0151414
ENSMUSG00000023781,2	Hes7	protein_coding	1.94156	4.4533e-05
ENSMUSG00000087235,1	Gm4750	transcribed_processed_pseudogene	1.93445	0.0168957
ENSMUSG00000103146,1	RP23-274C16,4	TEC	1.93039	2.52248e-05
ENSMUSG00000047702,1	Olfr1388	protein_coding	1.93035	0.0179724
ENSMUSG00000102480,1	RP24-161I8,1	TEC	1.93029	0.0298326
ENSMUSG00000021718,5	4933425L06Rik	protein_coding	1.92827	0.0130653
ENSMUSG00000102293,1	RP23-26I10,4	TEC	1.92384	0.00299331
ENSMUSG00000055933,9	Oosp3	protein_coding	1.92321	0.0236146
ENSMUSG00000084237,1	Gm11781	processed_pseudogene	1.92104	0.0283128
ENSMUSG00000092500,1	Gm20400	processed_transcript	1.91885	0.0300549
ENSMUSG00000104433,1	RP23-28G12,2	TEC	1.91638	0.0171968
ENSMUSG00000064339,1	mt-Rnr2	Mt_rRNA	1.91168	4.11995e-05
ENSMUSG00000049775,12	Tmsb4x	protein_coding	1.91028	0.00668287
ENSMUSG00000074109,4	Mrgprx2	protein_coding	1.90852	0.00549864
ENSMUSG00000043618,9	Eif5al3-ps	processed_pseudogene	1.90778	0.0122389
ENSMUSG00000069305,3	Hist1h4n	protein_coding	1.9077	0.026778
ENSMUSG00000103737,1	RP23-257D2,10	processed_pseudogene	1.90685	0.000612333
ENSMUSG00000025597,9	Klhl4	protein_coding	1.90666	0.0204448
ENSMUSG00000099784,1	Gm28525	lincRNA	1.90207	0.0137786
ENSMUSG00000080774,1	Gm9143	processed_pseudogene	1.89866	0.0257835
ENSMUSG00000032854,8	Ugt8a	protein_coding	1.89782	0.00731368
ENSMUSG00000104205,1	RP24-329M13,1	TEC	1.89654	0.0228484
ENSMUSG00000033377,10	Palmd	protein_coding	1.89537	0.00862724
ENSMUSG00000070594,6	Gm4788	protein_coding	1.89193	0.0295052
ENSMUSG00000056910,4	Vmn2r107	protein_coding	1.88905	0.0177894
ENSMUSG00000027285,9	Haus2	protein_coding	1.88748	0.00883222
ENSMUSG00000001891,12	Ugp2	protein_coding	1.88461	0.00293968
ENSMUSG00000073601,2	Serpinb3c	protein_coding	1.88447	0.0277354
ENSMUSG00000050028,4	Olfr745	protein_coding	1.8844	0.0250418
ENSMUSG00000029246,10	Ppat	protein_coding	1.88335	0.000688918
ENSMUSG00000046699,10	Slitrk4	protein_coding	1.88122	0.0283799
ENSMUSG00000067010,3	Vmn2r10	protein_coding	1.87967	0.0047005
ENSMUSG00000032985,11	5730522E02Rik	protein_coding	1.87853	0.00314229
ENSMUSG00000024205,7	Rpl36-ps2	processed_pseudogene	1.87835	0.0107945
ENSMUSG00000042092,5	Lce1c	protein_coding	1.87805	0.0338281
ENSMUSG00000022657,9	Cd96	protein_coding	1.87767	0.00448438
ENSMUSG00000082707,1	Gm6881	processed_pseudogene	1.87554	0.0178648
ENSMUSG00000037608,11	Bclaf1	protein_coding	1.8752	1.24052e-05
ENSMUSG00000074500,7	Zfp558	protein_coding	1.8748	0.000772701
ENSMUSG00000082896,1	Gm5844	processed_pseudogene	1.86903	0.000372817
ENSMUSG00000029629,12	Phf14	protein_coding	1.86614	2.07437e-05
ENSMUSG00000067001,7	Serpinb7	protein_coding	1.86566	0.00911659
ENSMUSG00000062121,2	Olfr149	protein_coding	1.86392	0.00614992
ENSMUSG00000050961,4	AY358078	protein_coding	1.86378	0.0385087
ENSMUSG00000063875,5	Rps6-ps1	processed_pseudogene	1.8636	0.00151
ENSMUSG00000020738,12	Sumo2	protein_coding	1.86213	0.00990166
ENSMUSG00000064508,1	n-R5s96	rRNA	1.86174	0.0147673
ENSMUSG00000062310,7	Glrp1	protein_coding	1.86147	0.0168957
ENSMUSG00000046258,4	Adam29	protein_coding	1.86128	0.0138708
ENSMUSG00000079104,4	Prps1l3	protein_coding	1.85834	0.0233068
ENSMUSG00000046330,9	Rpl37a	protein_coding	1.85746	0.00208206
ENSMUSG00000093674,3	Rpl41	protein_coding	1.85622	0.00237991
ENSMUSG00000005364,9	Il5ra	protein_coding	1.85489	0.038229
ENSMUSG00000047227,4	Gm527	protein_coding	1.85347	0.0289117
ENSMUSG00000022034,9	Esco2	protein_coding	1.85333	0.0087386
ENSMUSG00000024815,4	Trpd52l3	protein_coding	1.85253	0.00199684
ENSMUSG00000082583,1	Olfr336-ps1	unprocessed_pseudogene	1.85204	0.0393351
ENSMUSG00000032965,6	Ift57	protein_coding	1.85168	0.00549552
ENSMUSG00000064372,1	mt-Tp	Mt_tRNA	1.85079	0.0371483
ENSMUSG00000022314,9	Rad21	protein_coding	1.84853	1.19096e-05
ENSMUSG00000000787,8	Ddx3x	protein_coding	1.84581	0.00369241
ENSMUSG00000096047,1	n-R5s211	rRNA	1.84477	0.0344932
ENSMUSG00000079342,6	Gm5097	protein_coding	1.84433	0.0107945
ENSMUSG00000041857,6	Oosp1	protein_coding	1.84412	0.0344277
ENSMUSG00000074655,1	Gm1527	protein_coding	1.84213	0.0218406
ENSMUSG00000101900,1	Mrgprb12-ps	unprocessed_pseudogene	1.84078	0.0344277
ENSMUSG00000049093,9	Il23r	protein_coding	1.84026	0.0176599
ENSMUSG00000086752,1	Gm11674	lincRNA	1.83842	0.0161698
ENSMUSG00000074340,5	Ovgp1	protein_coding	1.83688	0.0355337
ENSMUSG00000067656,9	Slc22a27	protein_coding	1.83639	0.00351822
ENSMUSG00000065371,1	Gm22739	snRNA	1.83633	0.0391747
ENSMUSG00000099032,2	Tcf24	protein_coding	1.83619	0.0150184
ENSMUSG00000026166,10	Ccl20	protein_coding	1.83549	0.0141828
ENSMUSG00000102312,1	Pcdha3	protein_coding	1.83407	0.0426353
ENSMUSG00000019772,4	Vip	protein_coding	1.83401	0.0214403
ENSMUSG00000091879,1	Vmn2r17	protein_coding	1.83364	0.0220413
ENSMUSG00000091151,1	Vmn1r224	protein_coding	1.83363	0.0330629
ENSMUSG00000094936,3	Rbm4	protein_coding	1.83056	0.0349774
ENSMUSG00000031518,6	Spata4	protein_coding	1.83037	0.0116621
ENSMUSG00000069273,2	Hist1h3e	protein_coding	1.83	0.0206366
ENSMUSG00000030551,9	Nr2f2	protein_coding	1.82924	0.0035432
ENSMUSG00000027879,5	Sec22b	protein_coding	1.82921	0.0194935
ENSMUSG00000052748,10	Swt1	protein_coding	1.82788	1.27854e-05
ENSMUSG00000092702,2	Gm24514	misc_RNA	1.82671	0.0196363
ENSMUSG00000027104,14	Atf2	protein_coding	1.8264	0.000501316
ENSMUSG00000026219,10	Trip12	protein_coding	1.82277	6.91594e-08
ENSMUSG00000081657,1	Gm15466	processed_pseudogene	1.81889	0.0259268
ENSMUSG00000035626,2	Olfr1509	protein_coding	1.81713	0.038726
ENSMUSG00000093656,1	Gm20628	antisense	1.81632	0.0299692
ENSMUSG00000096243,1	Gm24265	snRNA	1.81484	0.0445032
ENSMUSG00000022057,7	Adamdec1	protein_coding	1.81368	0.0327366
ENSMUSG00000096429,1	Vmn2r-ps131	unprocessed_pseudogene	1.81182	0.0393037
ENSMUSG00000081374,1	Gm15011	processed_pseudogene	1.81052	0.0442288
ENSMUSG00000051758,6	4930544M13Rik	lincRNA	1.81044	0.00994876
ENSMUSG00000042901,6	Aida	protein_coding	1.80847	0.000123374
ENSMUSG00000070844,6	Vmn2r42	protein_coding	1.80788	0.00782972
ENSMUSG00000023919,7	Cenpq	protein_coding	1.80722	0.0158217
ENSMUSG00000019577,4	Pdk4	protein_coding	1.8061	0.000492618
ENSMUSG00000033721,12	Vav3	protein_coding	1.80528	0.00283654
ENSMUSG00000059182,5	Skap2	protein_coding	1.80496	0.003819
ENSMUSG00000034098,10	Fstl5	protein_coding	1.80393	0.00715716
ENSMUSG00000021785,7	Ngly1	protein_coding	1.8039	0.00926819
ENSMUSG00000104287,1	RP24-111L14,1	TEC	1.80045	0.0137447
ENSMUSG00000048538,7	Gm9826	processed_pseudogene	1.79972	0.0390766
ENSMUSG00000093775,1	Vmn2r-ps114	unprocessed_pseudogene	1.79739	0.0086977
ENSMUSG00000103216,1	RP24-490B17,5	TEC	1.79564	0.0197536
ENSMUSG00000100323,1	Olfr1251	protein_coding	1.79543	0.0471467
ENSMUSG00000063751,6	Gm13939	processed_transcript	1.79196	0.0434182
ENSMUSG00000049334,2	Olfr902	protein_coding	1.79128	0.0244783
ENSMUSG00000003617,12	Cp	protein_coding	1.79089	0.000347298
ENSMUSG00000090237,1	Gm16308	antisense	1.79033	0.0368754
ENSMUSG00000059498,9	Fcgr3	protein_coding	1.79006	0.000121422
ENSMUSG00000057262,1	Gm10020	protein_coding	1.78897	0.03748
ENSMUSG00000096065,1	Gm13155	processed_pseudogene	1.78804	0.0074151
ENSMUSG00000030061,12	Uba3	protein_coding	1.7863	0.0250883
ENSMUSG00000104221,1	RP23-347F2,1	TEC	1.78594	0.0300549
ENSMUSG00000062901,2	Klhl24	protein_coding	1.78522	0.00175945
ENSMUSG00000080746,3	Rpsa-ps12	processed_pseudogene	1.78389	0.00332447
ENSMUSG00000015932,8	Dstn	protein_coding	1.7831	0.00738691
ENSMUSG00000076281,1	Gm24270	miRNA	1.7828	0.00804938
ENSMUSG00000021796,10	Bmpr1a	protein_coding	1.77985	0.000626396
ENSMUSG00000091411,1	Gm5916	protein_coding	1.77895	0.00572302
ENSMUSG00000019998,5	Stx7	protein_coding	1.77894	0.0110235
ENSMUSG00000102133,1	RP23-268A12,2	TEC	1.77672	0.0102159
ENSMUSG00000031392,14	Irak1	protein_coding	1.7743	0.00221919
ENSMUSG00000064748,1	n-R5s28	rRNA	1.77325	0.0169192
ENSMUSG00000024097,10	Srsf7	protein_coding	1.77295	0.00846287
ENSMUSG00000091476,2	Gm16432	protein_coding	1.76989	0.000376114
ENSMUSG00000081864,2	Olfr405-ps1	transcribed_unprocessed_pseudogene	1.76824	0.0252472
ENSMUSG00000075380,1	Olfr355	protein_coding	1.76803	0.0340864
ENSMUSG00000032386,11	Trip4	protein_coding	1.76763	2.99388e-05
ENSMUSG00000083360,1	Gm13105	processed_pseudogene	1.76665	0.0277996
ENSMUSG00000075140,3	Olfr73	protein_coding	1.76618	0.0376616
ENSMUSG00000015242,10	Nipsnap3a	protein_coding	1.76605	0.0329475
ENSMUSG00000036934,8	4921524J17Rik	protein_coding	1.766	0.0491143
ENSMUSG00000077588,1	Gm24372	misc_RNA	1.76586	0.0164523
ENSMUSG00000054178,1	Gm9938	protein_coding	1.76418	0.0116581
ENSMUSG00000103214,1	RP23-21P2,7	TEC	1.76401	0.040463
ENSMUSG00000103558,1	RP23-103F2,2	TEC	1.76362	0.0106876
ENSMUSG00000028718,12	Stil	protein_coding	1.76317	0.00294661
ENSMUSG00000104197,1	RP23-44N5,7	TEC	1.7631	0.0148706
ENSMUSG00000038206,8	Fbxo8	protein_coding	1.75968	0.00912302
ENSMUSG00000103928,1	RP24-167M10,4	TEC	1.75837	0.0215079
ENSMUSG00000028173,6	Wls	protein_coding	1.7583	0.00447561
ENSMUSG00000046913,1	Olfr1451	protein_coding	1.75807	0.0292259
ENSMUSG00000042554,6	Zp3r	protein_coding	1.75749	0.0051932
ENSMUSG00000084966,1	2810471M01Rik	lincRNA	1.75703	0.0212858
ENSMUSG00000086708,1	Gm15577	antisense	1.75624	0.0387319
ENSMUSG00000041698,7	Slco1a1	protein_coding	1.75603	0.00301703
ENSMUSG00000091504,1	Vmn2r118	protein_coding	1.75523	0.00916434
ENSMUSG00000082128,1	Gm11824	processed_pseudogene	1.75382	0.0116957
ENSMUSG00000104064,1	RP23-273N4,8	TEC	1.75201	0.0441751
ENSMUSG00000029553,7	Tfec	protein_coding	1.75153	0.0135082
ENSMUSG00000055370,3	Gm9968	lincRNA	1.75066	0.0285699
ENSMUSG00000104489,1	RP24-217M2,2	processed_pseudogene	1.74975	0.0477563
ENSMUSG00000025040,9	Fundc1	protein_coding	1.7497	0.0332044
ENSMUSG00000022139,12	Mbnl2	protein_coding	1.74764	0.0116976
ENSMUSG00000032134,6	Muc16	protein_coding	1.7467	0.00580874
ENSMUSG00000026734,9	4921504E06Rik	protein_coding	1.74527	0.0191425
ENSMUSG00000088246,1	Gm25911	miRNA	1.74515	0.0206096
ENSMUSG00000043932,5	Klri2	protein_coding	1.74506	0.013074
ENSMUSG00000023150,10	Ivns1abp	protein_coding	1.74491	0.0017921
ENSMUSG00000048787,8	Dcun1d3	protein_coding	1.74486	0.00100856
ENSMUSG00000100703,2	Gm28358	transcribed_unprocessed_pseudogene	1.7447	0.0472834
ENSMUSG00000044548,7	Dact1	protein_coding	1.74362	0.0165832
ENSMUSG00000022329,10	Stk3	protein_coding	1.74239	0.000849657
ENSMUSG00000082895,1	Rpsa-ps9	processed_pseudogene	1.74125	0.0401096
ENSMUSG00000102325,1	RP24-329K3,1	TEC	1.7412	0.0169291
ENSMUSG00000028020,12	Glrb	protein_coding	1.73973	0.0194057
ENSMUSG00000086392,5	Mccc1os	antisense	1.7395	0.00680079
ENSMUSG00000038462,3	Uqcrfs1	protein_coding	1.73775	0.0354258
ENSMUSG00000046916,8	Myct1	protein_coding	1.73695	0.0288256
ENSMUSG00000001773,9	Folh1	protein_coding	1.73581	0.0180073
ENSMUSG00000068823,6	Csde1	protein_coding	1.7342	0.000827576
ENSMUSG00000071350,8	Setdb2	protein_coding	1.73374	0.0186486
ENSMUSG00000086608,1	4930562D21Rik	antisense	1.73155	0.0384197
ENSMUSG00000025326,8	Ube3a	protein_coding	1.73016	0.00895505
ENSMUSG00000094396,1	Vmn2r124	protein_coding	1.72902	0.0228344
ENSMUSG00000057522,11	Spop	protein_coding	1.72782	0.000199113
ENSMUSG00000067928,6	Zfp760	protein_coding	1.72742	0.0159928
ENSMUSG00000057841,3	Rpl32	protein_coding	1.72659	0.000813875
ENSMUSG00000086862,1	Gm13546	antisense	1.72573	0.0278131
ENSMUSG00000102189,1	RP23-448H3,2	TEC	1.7237	0.027736
ENSMUSG00000070527,3	Mkrn3	protein_coding	1.72313	0.0373342
ENSMUSG00000020149,13	Rab1	protein_coding	1.72102	0.00368679
ENSMUSG00000102629,1	RP23-469J3,4	processed_transcript	1.71905	0.00941843
ENSMUSG00000026107,7	Nabp1	protein_coding	1.71902	0.000263253
ENSMUSG00000082051,1	Gm16072	processed_pseudogene	1.71837	0.0157141
ENSMUSG00000067610,1	Klri1	protein_coding	1.71409	0.0401268
ENSMUSG00000020680,11	Taf15	protein_coding	1.71265	0.000268929
ENSMUSG00000104291,1	RP23-361M12,2	TEC	1.71198	0.00306723
ENSMUSG00000027201,12	Myef2	protein_coding	1.71166	0.00193207
ENSMUSG00000089947,1	Gm15509	sense_intronic	1.71012	0.038688
ENSMUSG00000037857,12	Nufip2	protein_coding	1.70967	0.00504496
ENSMUSG00000104068,1	RP23-264F2,1	TEC	1.70887	0.0402111
ENSMUSG00000012405,11	Rpl15	protein_coding	1.70663	0.0206759
ENSMUSG00000102383,1	RP23-26I10,2	TEC	1.70586	0.000608733
ENSMUSG00000056912,7	1700017N19Rik	protein_coding	1.70524	0.00365892
ENSMUSG00000073867,2	AA474408	protein_coding	1.70469	0.00537958
ENSMUSG00000019878,7	Hsf2	protein_coding	1.70384	0.0137936
ENSMUSG00000051705,8	Senp8	protein_coding	1.70367	0.015702
ENSMUSG00000051223,10	Bzw1	protein_coding	1.70329	0.000370927
ENSMUSG00000101348,2	Gm7135	transcribed_unprocessed_pseudogene	1.70295	0.0382408
ENSMUSG00000094692,1	Olfr738	protein_coding	1.70273	0.0455328
ENSMUSG00000054102,11	Nlrp9a	protein_coding	1.69987	0.0125154
ENSMUSG00000086909,1	Gm4926	lincRNA	1.69985	0.0295177
ENSMUSG00000051285,13	Pcmtd1	protein_coding	1.6991	0.0056785
ENSMUSG00000098549,1	Gm5269	protein_coding	1.69806	0.0120448
ENSMUSG00000094010,1	Vmn1r119	protein_coding	1.69643	0.0425203
ENSMUSG00000104293,1	RP23-363M8,2	TEC	1.69642	0.0104873
ENSMUSG00000022462,6	Slc38a2	protein_coding	1.69507	0.000956694
ENSMUSG00000040282,9	BC052040	protein_coding	1.69506	0.0119026
ENSMUSG00000022432,6	Smc1b	protein_coding	1.69441	0.00317632
ENSMUSG00000056329,3	1810010K12Rik	processed_transcript	1.69257	0.0373369
ENSMUSG00000101156,1	Gm29114	antisense	1.69137	0.015126
ENSMUSG00000022661,10	Cd200	protein_coding	1.69055	0.00615853
ENSMUSG00000051839,6	Gypa	protein_coding	1.69051	0.0337123
ENSMUSG00000095893,2	Olfr884	protein_coding	1.6901	0.0354708
ENSMUSG00000021877,7	Arf4	protein_coding	1.68602	0.0405144
ENSMUSG00000019906,10	Lin7a	protein_coding	1.68595	0.00549552
ENSMUSG00000032712,12	2810474O19Rik	protein_coding	1.68364	0.00370413
ENSMUSG00000027804,9	Ppid	protein_coding	1.68323	0.00543003
ENSMUSG00000075031,3	Hist1h2bb	protein_coding	1.68307	0.0355337
ENSMUSG00000097892,2	Gm26801	antisense	1.68011	0.0382176
ENSMUSG00000021270,9	Hsp90aa1	protein_coding	1.67974	0.000150613
ENSMUSG00000025066,9	Sfr1	protein_coding	1.67943	0.00198233
ENSMUSG00000029655,13	N4bp2l2	protein_coding	1.67913	0.000336442
ENSMUSG00000028549,13	Itgb3bp	protein_coding	1.67877	0.0327913
ENSMUSG00000042323,12	Pbrm1	protein_coding	1.67872	0.000263253
ENSMUSG00000002617,10	Zfp40	protein_coding	1.67711	0.0102954
ENSMUSG00000062200,8	Vmn2r7	protein_coding	1.67696	0.0223438
ENSMUSG00000030557,12	Mef2a	protein_coding	1.67637	0.00404307
ENSMUSG00000100053,1	Gm28154	antisense	1.67587	0.0230238
ENSMUSG00000103329,1	RP23-299N6,2	TEC	1.67542	0.0273631
ENSMUSG00000014725,10	Adam28	protein_coding	1.67517	0.0186893
ENSMUSG00000030421,8	Uri1	protein_coding	1.67502	0.0212938
ENSMUSG00000026574,5	Dpt	protein_coding	1.67499	0.0120162
ENSMUSG00000026866,12	Kynu	protein_coding	1.67442	0.0053477
ENSMUSG00000068606,5	Gm4841	protein_coding	1.67384	0.021255
ENSMUSG00000083087,1	Gm11249	processed_pseudogene	1.67218	0.0137288
ENSMUSG00000102744,1	RP24-490B17,6	TEC	1.672	0.0320337
ENSMUSG00000100078,1	Gm6170	processed_pseudogene	1.67122	0.0194329
ENSMUSG00000029375,6	Cxcl15	protein_coding	1.66953	0.0191762
ENSMUSG00000030562,12	Nox4	protein_coding	1.66702	0.00595014
ENSMUSG00000026914,11	Psmd14	protein_coding	1.66585	0.0316116
ENSMUSG00000033446,7	Lpar6	protein_coding	1.66304	0.0337656
ENSMUSG00000102630,1	RP23-232K16,3	TEC	1.66234	0.0149176
ENSMUSG00000069662,5	Marcks	protein_coding	1.66038	0.0314518
ENSMUSG00000027620,12	Rbm39	protein_coding	1.66003	0.00047382
ENSMUSG00000097452,1	Gm2824	lincRNA	1.65967	0.00705328
ENSMUSG00000084933,1	Gm13962	antisense	1.65795	0.0495564
ENSMUSG00000084098,1	Gm13422	processed_pseudogene	1.65655	0.0495564
ENSMUSG00000085386,1	Gm13630	processed_transcript	1.65634	0.0138344
ENSMUSG00000075097,1	Olfr1226	protein_coding	1.65615	0.032079
ENSMUSG00000104253,1	RP24-98O21,4	TEC	1.65597	0.00888815
ENSMUSG00000032518,5	Rpsa	protein_coding	1.65481	0.00114255
ENSMUSG00000040729,6	AK129341	protein_coding	1.65448	0.0137571
ENSMUSG00000029238,8	Clock	protein_coding	1.65402	0.000559195
ENSMUSG00000022523,9	Fgf12	protein_coding	1.65034	0.029207
ENSMUSG00000104503,1	RP23-447L15,3	TEC	1.64993	0.0225741
ENSMUSG00000034544,13	Rsrc1	protein_coding	1.64971	0.00128362
ENSMUSG00000043154,11	Ppp2r3a	protein_coding	1.64725	5.32151e-05
ENSMUSG00000033237,14	Arid2	protein_coding	1.64599	0.000463573
ENSMUSG00000027857,6	Tshb	protein_coding	1.6446	0.0421099
ENSMUSG00000038936,9	Sccpdh	protein_coding	1.64438	0.00196146
ENSMUSG00000086148,1	Gm15271	lincRNA	1.64418	0.0333487
ENSMUSG00000024750,6	Zfand5	protein_coding	1.64305	0.00963721
ENSMUSG00000097177,3	9330159M07Rik	processed_transcript	1.64293	0.0282261
ENSMUSG00000046191,7	Pcdhb20	protein_coding	1.64201	0.031912
ENSMUSG00000034329,12	Brip1	protein_coding	1.63869	0.000112407
ENSMUSG00000043929,12	Klhl15	protein_coding	1.63795	0.0013902
ENSMUSG00000100816,1	Gm28321	lincRNA	1.63755	0.0186486
ENSMUSG00000031519,2	Asb5	protein_coding	1.63745	0.0433782
ENSMUSG00000062186,1	Olfr395	protein_coding	1.6367	0.0264923
ENSMUSG00000019761,9	Krt10	protein_coding	1.63667	0.0365099
ENSMUSG00000103227,1	RP23-102B12,2	TEC	1.63641	0.0330883
ENSMUSG00000067780,3	Pi15	protein_coding	1.63635	0.00907611
ENSMUSG00000049674,6	Olfr714	protein_coding	1.63611	0.0418648
ENSMUSG00000029169,7	Dhx15	protein_coding	1.63589	0.00282846
ENSMUSG00000056313,5	1810011O10Rik	protein_coding	1.6358	0.041523
ENSMUSG00000099182,1	Gm8676	processed_pseudogene	1.63444	0.0163581
ENSMUSG00000094974,1	Rps19-ps2	processed_pseudogene	1.63041	0.0415732
ENSMUSG00000069824,4	Olfr377-ps1	transcribed_unprocessed_pseudogene	1.6292	0.0485159
ENSMUSG00000014074,13	Rnf168	protein_coding	1.62914	0.00249012
ENSMUSG00000026986,10	Hnmt	protein_coding	1.62902	0.0358862
ENSMUSG00000103181,1	RP23-121N19,3	lincRNA	1.62884	0.0450956
ENSMUSG00000027671,10	Actl6a	protein_coding	1.62819	0.00663129
ENSMUSG00000005698,11	Ctcf	protein_coding	1.62726	0.00141184
ENSMUSG00000021733,9	Slc4a7	protein_coding	1.62717	0.00339156
ENSMUSG00000064776,2	Gm25203	snoRNA	1.62699	0.0344043
ENSMUSG00000021098,10	4930447C04Rik	protein_coding	1.62654	0.0035235
ENSMUSG00000032551,6	1110059G10Rik	protein_coding	1.62632	0.0212746
ENSMUSG00000022205,11	Sub1	protein_coding	1.62539	0.000573696
ENSMUSG00000026141,9	Col19a1	protein_coding	1.62497	0.000204534
ENSMUSG00000103657,1	RP23-116P18,2	TEC	1.6242	0.0277639
ENSMUSG00000032399,7	Rpl4	protein_coding	1.62396	0.0292259
ENSMUSG00000030313,11	Dennd5b	protein_coding	1.62202	0.000600014
ENSMUSG00000082179,1	Gm11407	processed_pseudogene	1.6217	0.0442176
ENSMUSG00000009596,5	Taf7l	protein_coding	1.62161	0.0447538
ENSMUSG00000019528,14	Gyg	protein_coding	1.62125	0.0392561
ENSMUSG00000087369,1	Gm14696	lincRNA	1.61955	0.0448751
ENSMUSG00000097431,1	Gm26782	lincRNA	1.61951	0.0435716
ENSMUSG00000035161,6	Ints6	protein_coding	1.61831	0.0142109
ENSMUSG00000048015,3	Neurod4	protein_coding	1.61802	0.0171012
ENSMUSG00000070354,9	Gm21975	protein_coding	1.61776	0.0499316
ENSMUSG00000102240,1	RP23-242B14,1	TEC	1.61747	0.0186498
ENSMUSG00000067038,5	Rps12-ps3	protein_coding	1.61723	0.00670794
ENSMUSG00000016481,11	Cr1l	protein_coding	1.61694	0.000431796
ENSMUSG00000025395,10	Prim1	protein_coding	1.61635	0.00393641
ENSMUSG00000091923,3	Gm8267	protein_coding	1.61583	0.0471706
ENSMUSG00000103060,1	RP23-3H19,1	TEC	1.61511	0.0186055
ENSMUSG00000031256,7	Cstf2	protein_coding	1.6146	0.00786966
ENSMUSG00000063659,7	Zbtb18	protein_coding	1.61421	0.00180539
ENSMUSG00000027273,9	Snap25	protein_coding	1.61355	0.00543003
ENSMUSG00000097616,3	1110019D14Rik	lincRNA	1.61338	0.0378851
ENSMUSG00000081111,3	Gm5913	processed_pseudogene	1.61006	0.0118862
ENSMUSG00000102610,1	RP23-300L15,1	TEC	1.60988	0.049824
ENSMUSG00000036295,4	Lrrn3	protein_coding	1.6098	0.0277915
ENSMUSG00000031639,7	Tlr3	protein_coding	1.6095	0.0029258
ENSMUSG00000091825,1	Gm5778	processed_pseudogene	1.6092	0.0218054
ENSMUSG00000101795,2	Gm5835	processed_pseudogene	1.60817	0.00724827
ENSMUSG00000030641,9	Ddias	protein_coding	1.60768	0.0474171
ENSMUSG00000036095,10	Dgkb	protein_coding	1.60746	0.00395365
ENSMUSG00000061313,7	Ddhd2	protein_coding	1.60709	0.00166809
ENSMUSG00000029580,10	Actb	protein_coding	1.60568	0.0235371
ENSMUSG00000025958,10	Creb1	protein_coding	1.60545	2.28166e-05
ENSMUSG00000026405,10	C4bp	protein_coding	1.60463	0.000277874
ENSMUSG00000101877,1	Gm8176	processed_pseudogene	1.60435	0.0320723
ENSMUSG00000020948,8	Klhl28	protein_coding	1.60429	0.0438949
ENSMUSG00000103050,1	RP23-446D4,8	TEC	1.60298	0.0459039
ENSMUSG00000101969,1	Gm20125	lincRNA	1.60208	0.0245931
ENSMUSG00000102633,1	RP23-278E1,4	TEC	1.59961	0.0471289
ENSMUSG00000102597,1	RP24-132H2,1	TEC	1.59915	0.0499246
ENSMUSG00000071551,8	Akr1c19	protein_coding	1.59886	0.0172047
ENSMUSG00000084095,1	Gm11834	processed_pseudogene	1.59736	0.0498265
ENSMUSG00000025777,8	Gdap1	protein_coding	1.59713	0.00509704
ENSMUSG00000085582,3	3110099E03Rik	lincRNA	1.59648	0.0310545
ENSMUSG00000031379,9	Pir	protein_coding	1.59509	0.0351703
ENSMUSG00000075376,6	Rc3h2	protein_coding	1.59455	0.000213927
ENSMUSG00000086629,3	2810403D21Rik	processed_transcript	1.59249	0.0481907
ENSMUSG00000044098,10	Rsbn1	protein_coding	1.59211	0.00818069
ENSMUSG00000040132,6	Svs2	protein_coding	1.59162	0.0401871
ENSMUSG00000067919,8	Rex2	protein_coding	1.59082	0.00466497
ENSMUSG00000032407,9	U2surp	protein_coding	1.59063	0.000180227
ENSMUSG00000100706,2	Gm19744	processed_transcript	1.59015	0.020272
ENSMUSG00000038412,7	Higd1a	protein_coding	1.59012	0.0465068
ENSMUSG00000054766,9	Set	protein_coding	1.58951	0.000836231
ENSMUSG00000079108,5	Srp54b	protein_coding	1.58891	0.00580376
ENSMUSG00000100199,1	Gm20324	antisense	1.58822	0.00959439
ENSMUSG00000027132,3	Katnbl1	protein_coding	1.58809	0.0399999
ENSMUSG00000018481,9	Appbp2	protein_coding	1.58637	0.0200828
ENSMUSG00000102521,1	RP23-247F18,6	TEC	1.58357	0.0460809
ENSMUSG00000024679,6	Ms4a6d	protein_coding	1.5831	0.0222272
ENSMUSG00000096916,3	Zfp850	protein_coding	1.58163	0.0105645
ENSMUSG00000027282,13	Mtch2	protein_coding	1.58071	0.000392191
ENSMUSG00000019505,7	Ubb	protein_coding	1.57976	0.0149813
ENSMUSG00000036902,9	Neto2	protein_coding	1.5786	0.00233039
ENSMUSG00000073664,7	Nbeal1	protein_coding	1.57764	1.22245e-05
ENSMUSG00000089707,1	Slain1os	antisense	1.57712	0.0260809
ENSMUSG00000065037,1	Rn7sk	misc_RNA	1.57602	0.0221001
ENSMUSG00000050192,8	Eif5a2	protein_coding	1.57591	0.0330883
ENSMUSG00000026434,8	Nucks1	protein_coding	1.57562	0.000889848
ENSMUSG00000038510,8	Rpf2	protein_coding	1.57348	0.0297242
ENSMUSG00000027208,10	Fgf7	protein_coding	1.5731	0.0173345
ENSMUSG00000102941,1	RP23-211F21,4	lincRNA	1.57239	0.0354258
ENSMUSG00000022788,12	Fgd4	protein_coding	1.57237	7.43977e-05
ENSMUSG00000073490,6	AI607873	protein_coding	1.57229	0.0012329
ENSMUSG00000042993,6	Ifnk	protein_coding	1.57193	0.0485375
ENSMUSG00000028175,11	Depdc1a	protein_coding	1.57154	0.0250653
ENSMUSG00000062373,7	Tmem65	protein_coding	1.57062	0.0167046
ENSMUSG00000063550,7	Nup98	protein_coding	1.56895	0.00590304
ENSMUSG00000033940,7	Brk1	protein_coding	1.5682	0.0453942
ENSMUSG00000046808,13	Atp10d	processed_transcript	1.5664	0.000112407
ENSMUSG00000047735,12	Samd9l	protein_coding	1.56584	0.00586984
ENSMUSG00000029621,10	Arpc1a	protein_coding	1.56555	0.00223782
ENSMUSG00000031133,8	Arhgef6	protein_coding	1.56421	0.0195987
ENSMUSG00000033342,9	Lppr5	protein_coding	1.56386	0.0392561
ENSMUSG00000029245,12	Epha5	protein_coding	1.56385	0.00215113
ENSMUSG00000078810,3	Gp6	protein_coding	1.5631	0.0404438
ENSMUSG00000040321,3	Zfp770	protein_coding	1.56279	0.00720293
ENSMUSG00000029754,9	Dlx6	protein_coding	1.56272	0.0433051
ENSMUSG00000000266,7	Mid2	protein_coding	1.5621	0.0186113
ENSMUSG00000046282,7	Adam20	protein_coding	1.56203	0.024224
ENSMUSG00000097657,1	Gm7389	processed_pseudogene	1.56158	0.0257835
ENSMUSG00000047632,10	Fgfbp3	protein_coding	1.56134	0.0336329
ENSMUSG00000024383,8	Map3k2	protein_coding	1.56046	0.00456497
ENSMUSG00000033460,10	Armcx1	protein_coding	1.56021	0.0471964
ENSMUSG00000093610,3	Cyp2c53-ps	transcribed_unprocessed_pseudogene	1.55967	0.00129728
ENSMUSG00000103553,1	RP24-429G21,7	TEC	1.55892	0.0120135
ENSMUSG00000035849,10	Krt222	protein_coding	1.55735	0.00391529
ENSMUSG00000092203,3	1110038B12Rik	processed_transcript	1.55713	0.0288784
ENSMUSG00000026335,12	Pam	protein_coding	1.55692	0.000112407
ENSMUSG00000043911,4	Olfr922	protein_coding	1.55653	0.0347916
ENSMUSG00000090839,1	Gm17094	antisense	1.55621	0.0209927
ENSMUSG00000028015,3	Ctso	protein_coding	1.55453	0.0248918
ENSMUSG00000010461,10	Eya4	protein_coding	1.55425	0.00204012
ENSMUSG00000026155,9	Smap1	protein_coding	1.5532	0.0304715
ENSMUSG00000032940,12	Rbm11	protein_coding	1.55214	0.0268229
ENSMUSG00000026034,13	Clk1	protein_coding	1.55153	0.000519032
ENSMUSG00000060475,8	Wtap	protein_coding	1.55142	0.00199416
ENSMUSG00000021716,10	Srek1ip1	protein_coding	1.55019	0.0243059
ENSMUSG00000026743,12	Mllt10	protein_coding	1.54875	0.000610924
ENSMUSG00000100711,1	Gm29461	lincRNA	1.54872	0.0239557
ENSMUSG00000004591,12	Pkn2	protein_coding	1.54776	0.00298883
ENSMUSG00000040455,13	Usp45	protein_coding	1.54727	0.00556815
ENSMUSG00000025103,7	Btbd1	protein_coding	1.54565	0.0269556
ENSMUSG00000102451,1	RP24-260D21,2	TEC	1.54559	0.0382176
ENSMUSG00000035021,9	Baz1a	protein_coding	1.54353	0.000239403
ENSMUSG00000097839,1	Gm26909	lincRNA	1.54314	0.0402657
ENSMUSG00000027379,9	Bub1	protein_coding	1.54189	0.0271759
ENSMUSG00000043066,4	Vmn1r66	protein_coding	1.54178	0.0448751
ENSMUSG00000062991,6	Nrg1	protein_coding	1.54171	0.0112493
ENSMUSG00000104044,1	RP24-283P23,1	TEC	1.54054	0.0339922
ENSMUSG00000051729,7	Gm5087	lincRNA	1.54013	0.0384197
ENSMUSG00000024109,14	Nrxn1	protein_coding	1.54004	0.000184553
ENSMUSG00000005610,12	Eif4g2	protein_coding	1.53881	0.00235369
ENSMUSG00000026368,6	F13b	protein_coding	1.53846	0.0230881
ENSMUSG00000032437,9	Stt3b	protein_coding	1.53831	0.00764393
ENSMUSG00000022641,11	Bbx	protein_coding	1.53591	2.28166e-05
ENSMUSG00000030180,11	Kdm5a	protein_coding	1.53591	0.000213927
ENSMUSG00000104436,1	RP23-114L12,3	processed_transcript	1.53575	0.0240022
ENSMUSG00000037341,9	Slc9a7	protein_coding	1.53542	0.0176636
ENSMUSG00000025246,9	Tbl1x	protein_coding	1.53489	0.0164169
ENSMUSG00000102405,1	RP23-414N3,1	TEC	1.53346	0.0458066
ENSMUSG00000047866,14	Lonp2	protein_coding	1.5317	0.00192526
ENSMUSG00000042390,5	Gatad2b	protein_coding	1.53082	0.0285084
ENSMUSG00000079658,5	Tceb1	protein_coding	1.52837	0.00237346
ENSMUSG00000027187,6	Cat	protein_coding	1.52818	0.0200779
ENSMUSG00000024614,6	Tmx3	protein_coding	1.52644	0.0372734
ENSMUSG00000040818,7	Dennd6a	protein_coding	1.5257	0.0190791
ENSMUSG00000026585,9	Kifap3	protein_coding	1.52544	0.00271921
ENSMUSG00000025900,6	Rp1	protein_coding	1.52454	0.00308507
ENSMUSG00000032320,7	Rcn2	protein_coding	1.52407	0.0117215
ENSMUSG00000076731,2	Ighv8-12	IG_LV_gene	1.52336	0.0296711
ENSMUSG00000097354,3	2310001H17Rik	lincRNA	1.5233	0.0171914
ENSMUSG00000031262,8	Cenpi	protein_coding	1.52217	0.0293969
ENSMUSG00000079698,5	Vmn2r93	protein_coding	1.52195	0.0300549
ENSMUSG00000031196,9	F8	protein_coding	1.52187	0.0136969
ENSMUSG00000025915,10	Sgk3	protein_coding	1.52121	4.79547e-05
ENSMUSG00000039985,10	Fam60a	protein_coding	1.52116	0.0285699
ENSMUSG00000052783,12	Grk4	protein_coding	1.52101	0.00163964
ENSMUSG00000061259,7	Tmprss11d	protein_coding	1.52039	0.0229825
ENSMUSG00000036339,13	Tmem260	protein_coding	1.52028	0.00702768
ENSMUSG00000022722,14	Arl6	protein_coding	1.51846	0.0320723
ENSMUSG00000045662,12	Henmt1	protein_coding	1.51794	0.0464027
ENSMUSG00000051166,9	Eml5	protein_coding	1.51779	0.00016785
ENSMUSG00000035623,10	Rsf1	protein_coding	1.51748	6.83578e-05
ENSMUSG00000042155,3	Klhl23	protein_coding	1.51592	0.0184346
ENSMUSG00000022663,3	Atg3	protein_coding	1.51389	0.0250392
ENSMUSG00000035045,13	Zc3h12b	protein_coding	1.51313	0.00135787
ENSMUSG00000040446,3	Rprd1a	protein_coding	1.51168	0.0339047
ENSMUSG00000031715,10	Smarca5	protein_coding	1.51107	0.000505401
ENSMUSG00000026882,1	4930568D16Rik	protein_coding	1.51045	0.0433789
ENSMUSG00000027341,6	Tmem230	protein_coding	1.51039	0.0403399
ENSMUSG00000025262,8	Fam120c	protein_coding	1.51013	0.0327359
ENSMUSG00000043153,5	Ispd	protein_coding	1.50955	0.0389228
ENSMUSG00000094596,1	Gm10921	protein_coding	1.50451	0.0246359
ENSMUSG00000072679,6	D6Ertd474e	lincRNA	1.50374	0.0360171
ENSMUSG00000031559,10	4930555F03Rik	protein_coding	1.50368	0.00533309
ENSMUSG00000064999,1	Gm26035	misc_RNA	1.50367	0.0464027
ENSMUSG00000090031,2	4732440D04Rik	antisense	1.50314	0.013856
ENSMUSG00000100580,2	4933436I20Rik	lincRNA	1.50205	0.0215859
ENSMUSG00000043613,7	Mmp3	protein_coding	1.50194	0.0438018
ENSMUSG00000093536,3	Smim17	protein_coding	1.50139	0.0425115
ENSMUSG00000063273,7	Naa15	protein_coding	1.50118	4.09953e-05
ENSMUSG00000061544,9	Zfp229	protein_coding	1.50097	0.0091558
ENSMUSG00000025261,13	Huwe1	protein_coding	1.49924	0.00016785
ENSMUSG00000026004,11	Kansl1l	protein_coding	1.4985	0.00586984
ENSMUSG00000020954,11	Strn3	protein_coding	1.49483	0.0333245
ENSMUSG00000102657,1	RP23-204I16,3	TEC	1.49473	0.00446901
ENSMUSG00000023073,1	Slc10a2	protein_coding	1.49365	0.0355322
ENSMUSG00000071252,5	2210408I21Rik	protein_coding	1.49341	0.040587
ENSMUSG00000029254,12	Stap1	protein_coding	1.49253	0.0473454
ENSMUSG00000102277,1	RP23-393I12,4	TEC	1.49229	0.032707
ENSMUSG00000044308,13	Ubr3	protein_coding	1.49214	0.00161338
ENSMUSG00000028182,10	Lrriq3	protein_coding	1.49105	0.0222382
ENSMUSG00000027831,9	Veph1	protein_coding	1.49088	0.00705328
ENSMUSG00000058729,9	Lin9	protein_coding	1.48934	0.000223895
ENSMUSG00000019900,13	Rfx6	protein_coding	1.48801	0.00562984
ENSMUSG00000032487,8	Ptgs2	protein_coding	1.48751	0.0146064
ENSMUSG00000103937,1	RP23-414A20,3	TEC	1.48751	0.037371
ENSMUSG00000062621,2	Olfr911-ps1	protein_coding	1.48588	0.0445032
ENSMUSG00000089640,1	Gm6397	processed_pseudogene	1.4851	0.0250392
ENSMUSG00000044081,7	Zfp85os	antisense	1.4842	0.0118428
ENSMUSG00000025321,10	Itgb8	protein_coding	1.48413	0.000247821
ENSMUSG00000097777,3	Gm16794	antisense	1.48382	0.0375003
ENSMUSG00000033157,12	Abhd10	protein_coding	1.48197	0.0316116
ENSMUSG00000085091,1	Egfros	antisense	1.48156	0.0372608
ENSMUSG00000082806,1	Rpl13-ps1	processed_pseudogene	1.48143	0.0374108
ENSMUSG00000060205,2	Olfr57	protein_coding	1.48139	0.0227997
ENSMUSG00000002240,8	Prr27	protein_coding	1.4794	0.0347541
ENSMUSG00000060583,2	Olfr881	protein_coding	1.47913	0.0489328
ENSMUSG00000047216,8	Cdh19	protein_coding	1.47857	0.0408081
ENSMUSG00000020577,11	Tspan13	protein_coding	1.4781	0.0317571
ENSMUSG00000025979,9	Mob4	protein_coding	1.47752	0.0235347
ENSMUSG00000103494,1	RP23-366M5,2	TEC	1.4767	0.0440095
ENSMUSG00000064281,7	Rpl19-ps1	processed_pseudogene	1.47668	0.00391567
ENSMUSG00000096141,2	Dnah7a	protein_coding	1.47628	2.85447e-05
ENSMUSG00000020128,11	Vps54	protein_coding	1.47602	0.000499517
ENSMUSG00000032235,11	Ice2	protein_coding	1.476	0.00908399
ENSMUSG00000013662,5	Atad1	protein_coding	1.47538	0.0120127
ENSMUSG00000036202,11	Rif1	protein_coding	1.47527	0.000983402
ENSMUSG00000035694,11	Caps2	protein_coding	1.47511	0.0335439
ENSMUSG00000070501,9	BC094916	protein_coding	1.47446	0.00276541
ENSMUSG00000053980,4	Gm9930	protein_coding	1.47439	0.0402475
ENSMUSG00000045613,5	Chrm2	protein_coding	1.47411	0.0445032
ENSMUSG00000049728,10	Zfp668	protein_coding	1.47363	0.000184553
ENSMUSG00000079184,6	Mphosph8	protein_coding	1.47332	0.0105645
ENSMUSG00000087174,3	5530601H04Rik	processed_transcript	1.4727	0.023547
ENSMUSG00000014907,9	Naf1	protein_coding	1.47078	0.0443807
ENSMUSG00000091086,1	Gm5428	protein_coding	1.4701	0.0490353
ENSMUSG00000047126,13	Cltc	protein_coding	1.46956	0.000242108
ENSMUSG00000103722,1	RP23-73N8,4	TEC	1.46801	0.00795027
ENSMUSG00000022858,11	Tra2b	protein_coding	1.4665	0.0225597
ENSMUSG00000026670,11	Uap1	protein_coding	1.46443	0.00291281
ENSMUSG00000064299,5	4921528I07Rik	protein_coding	1.46329	0.0382117
ENSMUSG00000041763,10	Tpp2	protein_coding	1.46183	0.000981124
ENSMUSG00000044667,8	Lppr4	protein_coding	1.46155	0.0337656
ENSMUSG00000098505,2	Gm14496	protein_coding	1.46129	0.0478574
ENSMUSG00000027680,11	Fxr1	protein_coding	1.46077	0.0270833
ENSMUSG00000081210,1	Gm12933	processed_pseudogene	1.46035	0.0306002
ENSMUSG00000028262,9	Clca2	protein_coding	1.45906	0.0415684
ENSMUSG00000030516,10	Tjp1	protein_coding	1.45722	0.000518582
ENSMUSG00000052471,2	Gm9881	protein_coding	1.45616	0.0445032
ENSMUSG00000047910,6	Pcdhb16	protein_coding	1.45545	0.0394849
ENSMUSG00000103728,1	RP23-122F14,1	TEC	1.45361	0.00416819
ENSMUSG00000103129,1	RP24-287C2,1	TEC	1.45348	0.01684
ENSMUSG00000078624,2	Olfr613	protein_coding	1.45343	0.0352438
ENSMUSG00000038280,8	Ostm1	protein_coding	1.45331	0.0045545
ENSMUSG00000099779,1	Gm8228	processed_pseudogene	1.45329	0.0463024
ENSMUSG00000025955,9	Akr1cl	protein_coding	1.45233	0.00919016
ENSMUSG00000013736,12	Trnt1	protein_coding	1.45153	0.0415566
ENSMUSG00000031703,7	Itfg1	protein_coding	1.45001	0.0330883
ENSMUSG00000046856,9	Gpr1	protein_coding	1.44913	0.0170257
ENSMUSG00000060534,11	Dcc	protein_coding	1.44853	0.00537044
ENSMUSG00000032253,9	Phip	protein_coding	1.44853	5.81537e-05
ENSMUSG00000075070,6	4932412D23Rik	processed_transcript	1.44643	0.00672311
ENSMUSG00000039007,9	Cpq	protein_coding	1.44628	0.0316806
ENSMUSG00000091635,1	Vmn2r13	protein_coding	1.44626	0.0499865
ENSMUSG00000028222,2	Calb1	protein_coding	1.44606	0.0349836
ENSMUSG00000004698,9	Hdac9	protein_coding	1.44586	0.0211442
ENSMUSG00000021012,11	Zc3h14	protein_coding	1.44532	0.00538089
ENSMUSG00000028188,9	Spata1	protein_coding	1.44529	0.00947509
ENSMUSG00000030149,11	Klrk1	protein_coding	1.44479	0.0221681
ENSMUSG00000028180,14	Zranb2	protein_coding	1.44394	0.011983
ENSMUSG00000075520,5	Malrd1	protein_coding	1.44366	0.000528743
ENSMUSG00000062083,1	Rpl13a-ps1	protein_coding	1.44297	0.0197131
ENSMUSG00000014932,11	Yes1	protein_coding	1.44286	0.00783738
ENSMUSG00000033740,13	St18	protein_coding	1.44285	0.0018971
ENSMUSG00000096029,1	Olfr679	protein_coding	1.44163	0.024589
ENSMUSG00000027782,6	Kpna4	protein_coding	1.43918	0.00345469
ENSMUSG00000095432,4	Zfp748	protein_coding	1.43812	0.0300549
ENSMUSG00000026395,12	Ptprc	protein_coding	1.43738	0.000271373
ENSMUSG00000022754,5	Tmem45a	protein_coding	1.4368	0.0260386
ENSMUSG00000104284,1	RP23-74F20,2	sense_intronic	1.43676	0.0073388
ENSMUSG00000062198,4	2700097O09Rik	protein_coding	1.43663	0.0087386
ENSMUSG00000060508,11	Nlrp9b	protein_coding	1.43413	0.0177897
ENSMUSG00000060036,9	Rpl3	protein_coding	1.4336	0.00912302
ENSMUSG00000036916,9	Zfp280c	protein_coding	1.4315	0.0268928
ENSMUSG00000026150,10	Mff	protein_coding	1.43102	0.00332448
ENSMUSG00000017723,7	Wfdc2	protein_coding	1.43001	0.0202539
ENSMUSG00000054079,8	Utp18	protein_coding	1.4297	0.0179572
ENSMUSG00000079671,4	2610203C22Rik	processed_transcript	1.42923	0.0144837
ENSMUSG00000031093,10	Dock11	protein_coding	1.42873	0.0332559
ENSMUSG00000073821,7	8030451A03Rik	processed_transcript	1.4287	0.0487012
ENSMUSG00000027087,7	Itgav	protein_coding	1.42727	0.00102938
ENSMUSG00000092120,1	Vmn2r90	protein_coding	1.42696	0.0468335
ENSMUSG00000051278,8	Zgrf1	protein_coding	1.42622	0.00585816
ENSMUSG00000102625,1	RP24-105B23,2	TEC	1.4254	0.0409731
ENSMUSG00000025932,10	Eya1	protein_coding	1.42514	0.00166242
ENSMUSG00000022601,11	Zbtb11	protein_coding	1.42499	0.00284222
ENSMUSG00000041483,10	Zfp281	protein_coding	1.42427	0.0177024
ENSMUSG00000050270,8	Tmem220	protein_coding	1.42303	0.0284917
ENSMUSG00000045930,2	Clec14a	protein_coding	1.42281	0.0084573
ENSMUSG00000100910,1	Gm29128	antisense	1.42276	0.03304
ENSMUSG00000000568,11	Hnrnpd	protein_coding	1.42183	0.0137936
ENSMUSG00000031644,14	Nek1	protein_coding	1.42095	0.000287582
ENSMUSG00000015880,9	Ncapg	protein_coding	1.42075	0.0138202
ENSMUSG00000073647,3	Gm10557	pseudogene	1.42055	0.0141955
ENSMUSG00000023883,9	Phf10	protein_coding	1.41983	0.00248162
ENSMUSG00000048118,13	Arid4a	protein_coding	1.41982	0.00166881
ENSMUSG00000037325,6	Bbs7	protein_coding	1.41846	0.0168063
ENSMUSG00000081453,1	Gm6767	processed_pseudogene	1.41828	0.0302645
ENSMUSG00000102302,1	RP23-187M7,5	sense_intronic	1.41811	0.00694864
ENSMUSG00000027086,12	Fastkd1	protein_coding	1.41798	0.007584
ENSMUSG00000084902,1	Gm281	protein_coding	1.41795	0.0281829
ENSMUSG00000026761,8	Orc4	protein_coding	1.41701	0.00972397
ENSMUSG00000066000,8	2610305D13Rik	protein_coding	1.41672	0.00144638
ENSMUSG00000103291,1	RP24-92A2,1	TEC	1.41471	0.0105645
ENSMUSG00000078497,5	Gm13145	protein_coding	1.41416	0.0144377
ENSMUSG00000002428,8	Hltf	protein_coding	1.41266	0.0226444
ENSMUSG00000038975,10	Rabggtb	protein_coding	1.41201	0.0393036
ENSMUSG00000058835,10	Abi1	protein_coding	1.41162	0.0293241
ENSMUSG00000047996,12	Prrg1	protein_coding	1.41039	0.0468335
ENSMUSG00000027009,14	Itga4	protein_coding	1.40955	0.000910622
ENSMUSG00000001833,12	Sept7	protein_coding	1.40948	0.0337062
ENSMUSG00000037386,11	Rims2	protein_coding	1.40916	0.000897019
ENSMUSG00000022300,9	Dcaf13	protein_coding	1.40905	0.0145211
ENSMUSG00000019779,10	Frk	protein_coding	1.40884	0.0189944
ENSMUSG00000025531,10	Chm	protein_coding	1.40852	0.0320723
ENSMUSG00000037486,13	Asxl2	protein_coding	1.40852	8.39227e-05
ENSMUSG00000038349,10	Plcl1	protein_coding	1.40818	0.0117909
ENSMUSG00000016534,11	Lamp2	protein_coding	1.40783	0.0275467
ENSMUSG00000024810,12	Il33	protein_coding	1.40764	0.0154487
ENSMUSG00000086503,3	Xist	lincRNA	1.40727	0.0223922
ENSMUSG00000038546,8	Ranbp9	protein_coding	1.40618	0.0369019
ENSMUSG00000052854,11	Nrk	protein_coding	1.40586	0.0248297
ENSMUSG00000027248,9	Pdia3	protein_coding	1.40489	0.0235561
ENSMUSG00000074749,6	Kiz	protein_coding	1.40479	0.0385088
ENSMUSG00000025804,4	Ccr1	protein_coding	1.40381	0.0281124
ENSMUSG00000042699,7	Dhx9	protein_coding	1.40306	0.000504684
ENSMUSG00000004771,8	Rab11a	protein_coding	1.40264	0.0455594
ENSMUSG00000048249,10	Crebrf	protein_coding	1.40256	0.0119026
ENSMUSG00000042447,9	Mios	protein_coding	1.40152	0.0330883
ENSMUSG00000060073,5	Psma3	protein_coding	1.4014	0.0181182
ENSMUSG00000004096,8	Cwc15	protein_coding	1.40056	0.0157141
ENSMUSG00000021112,8	Mpp5	protein_coding	1.3995	0.010347
ENSMUSG00000024993,11	Fam45a	protein_coding	1.3991	0.0138171
ENSMUSG00000070686,6	C87414	protein_coding	1.39711	0.0178769
ENSMUSG00000079509,6	Zfx	protein_coding	1.39666	0.0203649
ENSMUSG00000034252,10	Senp6	protein_coding	1.39561	0.00613119
ENSMUSG00000104400,1	RP23-26I10,3	TEC	1.39483	0.0415346
ENSMUSG00000033400,10	Agl	protein_coding	1.39373	0.00016785
ENSMUSG00000021022,8	Ppp2r3c	protein_coding	1.39335	0.0478629
ENSMUSG00000020428,9	Gabra6	protein_coding	1.39303	0.027736
ENSMUSG00000031583,8	Wrn	protein_coding	1.39198	0.000734308
ENSMUSG00000064090,10	Vrk2	protein_coding	1.39009	0.00717233
ENSMUSG00000025245,9	Lztfl1	protein_coding	1.38984	0.00143169
ENSMUSG00000009376,11	Met	protein_coding	1.38974	0.00284222
ENSMUSG00000026028,8	Trak2	protein_coding	1.38807	0.00892527
ENSMUSG00000006599,9	Gtf2h1	protein_coding	1.38768	0.0369213
ENSMUSG00000026358,9	Rgs1	protein_coding	1.38677	0.0294643
ENSMUSG00000026319,9	2310035C23Rik	protein_coding	1.38673	0.0028039
ENSMUSG00000037953,7	A4gnt	protein_coding	1.38626	0.0466322
ENSMUSG00000005732,10	Ranbp1	protein_coding	1.38549	0.0383357
ENSMUSG00000053907,9	Mat2a	protein_coding	1.38421	0.0235414
ENSMUSG00000025997,9	Ikzf2	protein_coding	1.3842	0.0017921
ENSMUSG00000044976,12	Wdr72	protein_coding	1.38353	0.00347959
ENSMUSG00000046169,9	Adamts6	protein_coding	1.38295	0.00827333
ENSMUSG00000019892,8	Lrriq1	protein_coding	1.38258	0.00355206
ENSMUSG00000024680,8	Ms4a2	protein_coding	1.38255	0.018098
ENSMUSG00000030491,12	Tdrd12	protein_coding	1.38054	0.0120448
ENSMUSG00000026020,5	Nop58	protein_coding	1.38054	0.000505401
ENSMUSG00000087303,2	Lipo2	protein_coding	1.37898	0.0422455
ENSMUSG00000003418,11	St8sia6	protein_coding	1.37889	0.0108954
ENSMUSG00000036977,7	Anapc10	protein_coding	1.3783	0.0268229
ENSMUSG00000039913,8	Pak7	protein_coding	1.37536	0.0128521
ENSMUSG00000094921,1	Vmn2r112	protein_coding	1.37418	0.0343796
ENSMUSG00000102561,1	RP23-148E7,2	TEC	1.37289	0.0456677
ENSMUSG00000030884,7	Uqcrc2	protein_coding	1.37226	0.0292904
ENSMUSG00000027122,11	Arl14ep	protein_coding	1.37136	0.0270286
ENSMUSG00000029306,8	Ibsp	protein_coding	1.37105	0.0108765
ENSMUSG00000024747,3	Aldh1a7	protein_coding	1.37089	0.0144377
ENSMUSG00000024269,7	Tpgs2	protein_coding	1.37027	0.0163078
ENSMUSG00000038784,9	Cnot4	protein_coding	1.36994	0.00267485
ENSMUSG00000027018,7	Hat1	protein_coding	1.36962	0.038229
ENSMUSG00000036792,8	Mbd5	protein_coding	1.36938	0.00026011
ENSMUSG00000023186,10	Vwa5a	protein_coding	1.36867	0.000688918
ENSMUSG00000032400,13	Zwilch	protein_coding	1.36851	0.00715484
ENSMUSG00000044350,10	Lacc1	protein_coding	1.36843	0.0473454
ENSMUSG00000016756,12	Cmah	protein_coding	1.36843	0.00233039
ENSMUSG00000045103,13	Dmd	protein_coding	1.3681	0.000649699
ENSMUSG00000023066,9	Rttn	protein_coding	1.368	0.0122103
ENSMUSG00000034007,9	Scaper	protein_coding	1.36701	0.00477955
ENSMUSG00000046351,6	Zfp322a	protein_coding	1.36687	0.0315382
ENSMUSG00000053641,8	Dennd4a	protein_coding	1.36681	0.000501182
ENSMUSG00000031939,11	Taf1d	protein_coding	1.36672	0.0334283
ENSMUSG00000050912,11	Tmem123	protein_coding	1.36652	0.0112579
ENSMUSG00000021830,9	Txndc16	protein_coding	1.36633	0.00464011
ENSMUSG00000040969,10	Arhgef38	protein_coding	1.36593	0.0127202
ENSMUSG00000028576,8	Ift74	protein_coding	1.36544	0.0478629
ENSMUSG00000037940,11	Inpp4b	protein_coding	1.36541	0.00082355
ENSMUSG00000041828,11	Abca8a	protein_coding	1.36511	0.00276832
ENSMUSG00000008226,10	Scrn3	protein_coding	1.3646	0.00722178
ENSMUSG00000029403,10	Cdkl2	protein_coding	1.36377	0.014927
ENSMUSG00000034801,9	Sos2	protein_coding	1.36356	0.00196045
ENSMUSG00000039270,5	Megf9	protein_coding	1.36348	0.0284917
ENSMUSG00000075318,8	Scn2a1	protein_coding	1.3628	0.00353515
ENSMUSG00000036676,10	Tmtc3	protein_coding	1.36221	0.0128652
ENSMUSG00000102990,1	RP23-53N22,4	TEC	1.36039	0.0472961
ENSMUSG00000022051,11	Bnip3l	protein_coding	1.3596	0.0256547
ENSMUSG00000022659,9	Gcsam	protein_coding	1.35957	0.0428037
ENSMUSG00000026103,10	Gls	protein_coding	1.35893	0.000610924
ENSMUSG00000020982,8	Nemf	protein_coding	1.35854	0.00753934
ENSMUSG00000022829,10	Stxbp5l	protein_coding	1.35766	0.0169455
ENSMUSG00000060988,8	Galnt13	protein_coding	1.35757	0.0135272
ENSMUSG00000023845,6	Lnpep	protein_coding	1.35604	0.0062562
ENSMUSG00000015748,9	Prpf3	protein_coding	1.35466	0.00398353
ENSMUSG00000036790,5	Slitrk2	protein_coding	1.35454	0.0344277
ENSMUSG00000104132,1	RP23-184I13,5	TEC	1.35404	0.0204097
ENSMUSG00000025939,13	Ube2w	protein_coding	1.35354	0.0448867
ENSMUSG00000028030,8	Tbck	protein_coding	1.35221	0.00339888
ENSMUSG00000040204,6	2810417H13Rik	protein_coding	1.35164	0.0499334
ENSMUSG00000032217,8	Rnf111	protein_coding	1.34986	0.0133826
ENSMUSG00000019927,6	Ube2d1	protein_coding	1.3485	0.00914389
ENSMUSG00000057098,10	Ebf1	protein_coding	1.34846	0.00154121
ENSMUSG00000028080,11	Lrba	protein_coding	1.34701	0.000416342
ENSMUSG00000032181,6	Scg3	protein_coding	1.3468	0.0421099
ENSMUSG00000054523,9	Ms4a5	protein_coding	1.34624	0.0311281
ENSMUSG00000028086,10	Fbxw7	protein_coding	1.34601	0.0137447
ENSMUSG00000026786,10	Apbb1ip	protein_coding	1.34597	0.00147083
ENSMUSG00000030660,8	Pik3c2a	protein_coding	1.34548	0.00586984
ENSMUSG00000053774,8	Ubxn7	protein_coding	1.34548	0.00258717
ENSMUSG00000028484,12	Psip1	protein_coding	1.34512	0.0327013
ENSMUSG00000035258,10	Abi3bp	protein_coding	1.34456	0.0154487
ENSMUSG00000034560,5	A230046K03Rik	protein_coding	1.34387	0.00724827
ENSMUSG00000026043,14	Col3a1	protein_coding	1.34219	0.00305926
ENSMUSG00000008763,12	Man1a2	protein_coding	1.34057	0.00738181
ENSMUSG00000068039,8	Tcp1	protein_coding	1.34022	0.00383703
ENSMUSG00000092086,1	Gm6793	protein_coding	1.33983	0.0125089
ENSMUSG00000056211,9	R3hdm1	protein_coding	1.33861	0.000130725
ENSMUSG00000018548,11	Trim37	protein_coding	1.33832	0.00399447
ENSMUSG00000032769,4	Trpa1	protein_coding	1.33754	0.00758044
ENSMUSG00000061665,6	Cd2ap	protein_coding	1.33743	0.0294643
ENSMUSG00000025816,11	Sec61a2	protein_coding	1.33604	0.0410243
ENSMUSG00000086277,2	4930558K02Rik	protein_coding	1.33597	0.0339566
ENSMUSG00000026439,10	Rbbp5	protein_coding	1.33554	0.00486804
ENSMUSG00000039578,12	Ccser1	protein_coding	1.33522	0.0413335
ENSMUSG00000064373,7	Sepp1	protein_coding	1.33508	0.0364766
ENSMUSG00000032374,10	Plod2	protein_coding	1.33468	0.0229383
ENSMUSG00000033308,12	Dpyd	protein_coding	1.33459	0.011704
ENSMUSG00000057335,7	Cep170	protein_coding	1.33217	0.000352365
ENSMUSG00000099706,1	Gm29536	lincRNA	1.33213	0.0459081
ENSMUSG00000090286,1	Gm17615	protein_coding	1.33085	0.0439916
ENSMUSG00000024359,8	Hspa9	protein_coding	1.33079	0.0169291
ENSMUSG00000037922,9	Bank1	protein_coding	1.33074	0.0289118
ENSMUSG00000030655,10	Smg1	protein_coding	1.33037	0.000336432
ENSMUSG00000026535,9	Ifi202b	protein_coding	1.32989	0.0223328
ENSMUSG00000036944,5	Tmem71	protein_coding	1.32851	0.00925093
ENSMUSG00000038725,7	Pkhd1l1	protein_coding	1.32829	0.000435009
ENSMUSG00000040351,7	Ankib1	protein_coding	1.32808	0.00656979
ENSMUSG00000006014,12	Prg4	protein_coding	1.32762	0.0273435
ENSMUSG00000097893,3	1700034P13Rik	antisense	1.32657	0.0115227
ENSMUSG00000028780,9	Sema3c	protein_coding	1.32607	0.0167017
ENSMUSG00000000766,14	Oprm1	protein_coding	1.32593	0.00211568
ENSMUSG00000067276,5	Capn6	protein_coding	1.32584	0.0439416
ENSMUSG00000103923,1	RP23-349L18,1	lincRNA	1.32557	0.0461972
ENSMUSG00000043410,12	Hfm1	protein_coding	1.32538	0.0237735
ENSMUSG00000085440,1	Sorbs2os	antisense	1.32521	0.0464661
ENSMUSG00000019256,13	Ahr	protein_coding	1.32484	0.0191736
ENSMUSG00000026987,12	Baz2b	protein_coding	1.3247	0.00171925
ENSMUSG00000032113,11	Chek1	protein_coding	1.32446	0.00190497
ENSMUSG00000034158,9	Lrrc58	protein_coding	1.32412	0.00405918
ENSMUSG00000036768,5	Kif15	protein_coding	1.3226	0.0038358
ENSMUSG00000023025,11	Larp4	protein_coding	1.32252	0.0351278
ENSMUSG00000039191,8	Rbpj	protein_coding	1.32232	0.0212732
ENSMUSG00000033177,9	Tmprss7	protein_coding	1.32218	0.0498217
ENSMUSG00000047412,11	Zbtb44	protein_coding	1.32199	0.00551123
ENSMUSG00000060147,11	Serpinb6a	protein_coding	1.32165	0.0296711
ENSMUSG00000021147,12	Wdr37	protein_coding	1.32142	0.0142858
ENSMUSG00000037270,13	4932438A13Rik	protein_coding	1.31941	0.000674277
ENSMUSG00000034731,9	Dgkh	protein_coding	1.31903	0.0229994
ENSMUSG00000042104,14	Uggt2	protein_coding	1.31897	0.00626046
ENSMUSG00000042284,9	Itga1	protein_coding	1.31877	0.0130653
ENSMUSG00000040124,5	Gorab	protein_coding	1.3171	0.0488525
ENSMUSG00000031592,9	Pcm1	protein_coding	1.31653	0.000384475
ENSMUSG00000069089,7	Cdk7	protein_coding	1.31603	0.0208845
ENSMUSG00000003226,6	Ranbp2	protein_coding	1.31573	0.00331421
ENSMUSG00000038147,9	Cd84	protein_coding	1.31549	0.0051932
ENSMUSG00000020454,13	Eif4enif1	protein_coding	1.31512	0.00147779
ENSMUSG00000018379,13	Srsf1	protein_coding	1.31491	0.0149698
ENSMUSG00000044322,6	Dsc1	protein_coding	1.31437	0.046105
ENSMUSG00000031174,13	Rpgr	protein_coding	1.31437	0.041907
ENSMUSG00000020580,9	Rock2	protein_coding	1.31209	0.00248932
ENSMUSG00000019813,11	Cep57l1	protein_coding	1.3117	0.00434866
ENSMUSG00000034973,12	Dopey1	protein_coding	1.31103	0.00182972
ENSMUSG00000055371,13	Stam2	protein_coding	1.30937	0.0224584
ENSMUSG00000026384,9	Ptpn4	protein_coding	1.30932	0.00180859
ENSMUSG00000024982,9	Zdhhc6	protein_coding	1.30895	0.0227589
ENSMUSG00000041390,14	Mdfic	protein_coding	1.30879	0.00519162
ENSMUSG00000053441,4	Adamts19	protein_coding	1.30831	0.0442176
ENSMUSG00000089922,1	3110039M20Rik	protein_coding	1.30798	0.0389938
ENSMUSG00000042305,8	Tmem183a	protein_coding	1.30795	0.001497
ENSMUSG00000063888,6	Rpl7l1	protein_coding	1.30625	0.0223328
ENSMUSG00000053007,6	Creb5	protein_coding	1.30596	0.039389
ENSMUSG00000037708,12	BC061194	protein_coding	1.30501	0.0389938
ENSMUSG00000028211,7	Trp53inp1	protein_coding	1.30366	0.00957339
ENSMUSG00000023931,4	Efhb	protein_coding	1.30262	0.0144704
ENSMUSG00000033569,13	Bai3	protein_coding	1.30253	0.00180136
ENSMUSG00000021669,10	Col4a3bp	protein_coding	1.30214	0.00791797
ENSMUSG00000026147,12	Col9a1	protein_coding	1.30036	0.0116581
ENSMUSG00000097151,1	Gm26514	lincRNA	1.29974	0.0482807
ENSMUSG00000041301,11	Cftr	protein_coding	1.29821	0.0169975
ENSMUSG00000025104,9	Hdgfrp3	protein_coding	1.29782	0.020785
ENSMUSG00000021103,8	Mnat1	protein_coding	1.29764	0.0185127
ENSMUSG00000073678,4	Pgap1	protein_coding	1.29739	0.000824787
ENSMUSG00000017831,7	Rab5a	protein_coding	1.29697	0.0278353
ENSMUSG00000075325,3	Gm13582	lincRNA	1.29692	0.0348639
ENSMUSG00000079227,5	Ccr5	protein_coding	1.2967	0.0198498
ENSMUSG00000000197,7	Nalcn	protein_coding	1.29661	0.0137466
ENSMUSG00000036461,11	Elf1	protein_coding	1.29557	0.0389938
ENSMUSG00000047562,2	Mmp10	protein_coding	1.29531	0.0487047
ENSMUSG00000042042,10	Csgalnact2	protein_coding	1.29513	0.0337062
ENSMUSG00000052917,10	Senp7	protein_coding	1.29456	0.0084573
ENSMUSG00000060771,10	Tsga10	protein_coding	1.29455	0.00283343
ENSMUSG00000085125,3	Gm16070	antisense	1.29356	0.0323465
ENSMUSG00000074734,2	4933416C03Rik	protein_coding	1.29342	0.0384696
ENSMUSG00000039539,9	Sgcz	protein_coding	1.29283	0.0388745
ENSMUSG00000058690,10	Ccser2	protein_coding	1.29067	0.0048337
ENSMUSG00000041268,12	Dmxl2	protein_coding	1.29019	0.000821406
ENSMUSG00000022636,9	Alcam	protein_coding	1.29017	0.00294661
ENSMUSG00000028571,11	Cyp2j13	protein_coding	1.28985	0.0451233
ENSMUSG00000067229,3	Cyp2c66	protein_coding	1.28841	0.0285338
ENSMUSG00000027660,12	Skil	protein_coding	1.28803	0.00612727
ENSMUSG00000044147,7	Arf6	protein_coding	1.2876	0.0126876
ENSMUSG00000037400,12	Atp11b	protein_coding	1.2873	0.0249871
ENSMUSG00000032582,10	Rbm6	protein_coding	1.28475	0.000499517
ENSMUSG00000064329,9	Scn1a	protein_coding	1.28443	0.00737789
ENSMUSG00000075249,8	Fsip2	protein_coding	1.28435	0.00183976
ENSMUSG00000053626,4	Tll1	protein_coding	1.28398	0.00524964
ENSMUSG00000019977,11	Hbs1l	protein_coding	1.28278	0.00567942
ENSMUSG00000034297,10	Med13	protein_coding	1.2806	0.000942079
ENSMUSG00000058624,8	Gda	protein_coding	1.27926	0.00541836
ENSMUSG00000081797,1	Gm8662	processed_pseudogene	1.27888	0.0473454
ENSMUSG00000043943,10	Naalad2	protein_coding	1.27848	0.0105118
ENSMUSG00000028998,6	Tomm7	protein_coding	1.27825	0.029634
ENSMUSG00000026276,13	Sept2	protein_coding	1.27805	0.00284222
ENSMUSG00000036208,9	BC027231	protein_coding	1.27799	0.0464661
ENSMUSG00000068794,6	Col28a1	protein_coding	1.2777	0.016155
ENSMUSG00000035798,9	Zdhhc17	protein_coding	1.27734	0.0422455
ENSMUSG00000027763,9	Mbnl1	protein_coding	1.27724	0.00432891
ENSMUSG00000097028,2	Ptgs2os	processed_transcript	1.27716	0.0137447
ENSMUSG00000042520,12	Ubap2l	protein_coding	1.27715	0.00919626
ENSMUSG00000102960,1	RP24-444I15,4	TEC	1.27468	0.0156199
ENSMUSG00000089862,4	Gm16039	protein_coding	1.27378	0.0307573
ENSMUSG00000045205,12	Dpy19l4	protein_coding	1.27377	0.0379799
ENSMUSG00000040865,11	Ino80d	protein_coding	1.27348	0.000275153
ENSMUSG00000097058,1	4930556M19Rik	lincRNA	1.27211	0.0169863
ENSMUSG00000038174,10	Fam126b	protein_coding	1.27153	0.0013252
ENSMUSG00000036777,7	Anln	protein_coding	1.2701	0.00378231
ENSMUSG00000039585,11	Myo9a	protein_coding	1.26967	0.00130158
ENSMUSG00000022838,9	Eaf2	protein_coding	1.26892	0.0404111
ENSMUSG00000041491,7	Cep78	protein_coding	1.26703	0.0120448
ENSMUSG00000035270,11	Impg2	protein_coding	1.26638	0.00600724
ENSMUSG00000022008,3	Gpalpp1	protein_coding	1.26454	0.040832
ENSMUSG00000101799,1	9330175M20Rik	antisense	1.26395	0.0317429
ENSMUSG00000034151,9	Zbbx	protein_coding	1.26368	0.0231341
ENSMUSG00000033952,10	Aspm	protein_coding	1.26118	0.00227463
ENSMUSG00000032384,11	Csnk1g1	protein_coding	1.26059	0.00109469
ENSMUSG00000025240,8	Sacm1l	protein_coding	1.26026	0.0474166
ENSMUSG00000026159,9	Agfg1	protein_coding	1.25919	0.00393107
ENSMUSG00000079523,4	Tmsb10	protein_coding	1.25855	0.0312286
ENSMUSG00000002565,12	Scin	protein_coding	1.25847	0.00909713
ENSMUSG00000059834,8	Sclt1	protein_coding	1.25807	0.0119223
ENSMUSG00000063108,10	Zfp26	protein_coding	1.25681	0.0171449
ENSMUSG00000046442,4	Ppm1e	protein_coding	1.25559	0.00801831
ENSMUSG00000084548,1	n-R5s175	rRNA	1.25542	0.00580884
ENSMUSG00000037643,10	Prkci	protein_coding	1.25495	0.00551123
ENSMUSG00000024298,10	Zfp871	protein_coding	1.25488	0.0224772
ENSMUSG00000036890,9	Gtdc1	protein_coding	1.25273	0.00750007
ENSMUSG00000062209,11	Erbb4	protein_coding	1.25271	0.00294661
ENSMUSG00000056300,10	Gm13247	protein_coding	1.25206	0.0298034
ENSMUSG00000005907,10	Pex1	protein_coding	1.24979	0.00332447
ENSMUSG00000034848,13	Ttc21b	protein_coding	1.24965	0.00459425
ENSMUSG00000028197,4	Col24a1	protein_coding	1.24903	0.0273961
ENSMUSG00000026012,2	Cd28	protein_coding	1.24789	0.018182
ENSMUSG00000028414,12	Fktn	protein_coding	1.24769	0.0499762
ENSMUSG00000070605,4	Gm13251	protein_coding	1.24619	0.0484754
ENSMUSG00000003929,10	Zfp81	protein_coding	1.24455	0.0427731
ENSMUSG00000020849,9	Ywhae	protein_coding	1.24436	0.0289397
ENSMUSG00000036885,10	Arhgef26	protein_coding	1.24139	0.0155029
ENSMUSG00000040648,10	Ppip5k2	protein_coding	1.24135	0.000741755
ENSMUSG00000037474,9	Dtl	protein_coding	1.24064	0.000797412
ENSMUSG00000021765,7	Fst	protein_coding	1.24027	0.0387166
ENSMUSG00000027778,11	Ift80	protein_coding	1.24	0.00313473
ENSMUSG00000089678,4	Agxt2	protein_coding	1.23966	0.00210407
ENSMUSG00000020620,10	Abca8b	protein_coding	1.2391	0.0026589
ENSMUSG00000042446,12	Zmym4	protein_coding	1.23873	0.00321784
ENSMUSG00000102289,1	RP23-428H16,1	TEC	1.23858	0.0490353
ENSMUSG00000019809,12	Pex3	protein_coding	1.23795	0.03748
ENSMUSG00000030846,11	Tial1	protein_coding	1.23631	0.0480893
ENSMUSG00000006586,11	Runx1t1	protein_coding	1.23454	0.0105368
ENSMUSG00000027180,8	Fbxo3	protein_coding	1.23454	0.00670273
ENSMUSG00000026429,8	Ube2t	protein_coding	1.23448	0.0484904
ENSMUSG00000048922,14	Cdca2	protein_coding	1.23354	0.0132567
ENSMUSG00000029221,11	Slc30a9	protein_coding	1.23295	0.00781663
ENSMUSG00000020462,10	Cfap36	protein_coding	1.23288	0.04527
ENSMUSG00000053303,10	Slc22a26	protein_coding	1.23285	0.0473454
ENSMUSG00000104413,1	RP23-77A8,2	antisense	1.23143	0.0457469
ENSMUSG00000031229,12	Atrx	protein_coding	1.23143	0.00291329
ENSMUSG00000039097,5	Rln1	protein_coding	1.23125	0.0349836
ENSMUSG00000038733,9	Wdr26	protein_coding	1.23047	0.00531523
ENSMUSG00000102465,1	RP23-184I13,2	TEC	1.23041	0.0453772
ENSMUSG00000035614,10	Fam179b	protein_coding	1.23037	0.0173349
ENSMUSG00000032405,9	Pias1	protein_coding	1.23019	0.0107945
ENSMUSG00000052407,12	Ccdc171	protein_coding	1.22984	0.0147673
ENSMUSG00000034021,11	Pds5b	protein_coding	1.22787	0.00325529
ENSMUSG00000027787,10	Nmd3	protein_coding	1.22667	0.017641
ENSMUSG00000043065,8	Spice1	protein_coding	1.22615	0.0292605
ENSMUSG00000045210,8	Vcpip1	protein_coding	1.22612	0.00747866
ENSMUSG00000091277,1	Gm1818	protein_coding	1.22594	0.0495087
ENSMUSG00000040420,10	Cdh18	protein_coding	1.22521	0.0325937
ENSMUSG00000024294,9	Mib1	protein_coding	1.22491	0.0038448
ENSMUSG00000020719,10	Ddx5	protein_coding	1.22479	0.0168203
ENSMUSG00000024975,8	Pdcd4	protein_coding	1.22467	0.0207229
ENSMUSG00000026721,11	Rabgap1l	protein_coding	1.2244	0.000943839
ENSMUSG00000026499,5	Acbd3	protein_coding	1.2241	0.00294633
ENSMUSG00000064127,9	Med14	protein_coding	1.22286	0.0377506
ENSMUSG00000009628,10	Tex15	protein_coding	1.22166	0.00400899
ENSMUSG00000035236,13	Scai	protein_coding	1.22117	0.0113286
ENSMUSG00000034723,7	Tmx4	protein_coding	1.22095	0.00369143
ENSMUSG00000019132,6	BC005537	protein_coding	1.22037	0.0288074
ENSMUSG00000036707,12	Cab39	protein_coding	1.2198	0.00976128
ENSMUSG00000014353,10	Tmem87b	protein_coding	1.21891	0.00607439
ENSMUSG00000046785,7	Epm2aip1	protein_coding	1.21868	0.00961792
ENSMUSG00000063015,8	Ccni	protein_coding	1.21854	0.0165315
ENSMUSG00000039219,13	Arid4b	protein_coding	1.21826	0.00249012
ENSMUSG00000033577,14	Myo6	protein_coding	1.21692	0.0023647
ENSMUSG00000052613,12	Pcdh15	protein_coding	1.21658	0.000535076
ENSMUSG00000027287,10	Snap23	protein_coding	1.21592	0.0277915
ENSMUSG00000038836,11	Agbl3	protein_coding	1.21528	0.00906017
ENSMUSG00000026312,13	Cdh7	protein_coding	1.2148	0.0294643
ENSMUSG00000032449,9	Slc25a36	protein_coding	1.21434	0.0268229
ENSMUSG00000030031,10	Kbtbd8	protein_coding	1.21403	0.0426903
ENSMUSG00000033991,8	Ttc37	protein_coding	1.21379	0.0217117
ENSMUSG00000027665,9	Pik3ca	protein_coding	1.21242	0.0228438
ENSMUSG00000031010,13	Usp9x	protein_coding	1.21139	0.00769312
ENSMUSG00000035992,11	Fnip1	protein_coding	1.21139	0.00312117
ENSMUSG00000022883,10	Robo1	protein_coding	1.21116	0.00670672
ENSMUSG00000036112,10	Metap2	protein_coding	1.21088	0.00240419
ENSMUSG00000063683,8	Glyat	protein_coding	1.21023	0.0135865
ENSMUSG00000087038,5	2900079G21Rik	lincRNA	1.20999	0.0190949
ENSMUSG00000044791,12	Setd2	protein_coding	1.2099	0.00227463
ENSMUSG00000032097,9	Ddx6	protein_coding	1.20889	0.0231452
ENSMUSG00000026245,12	Farsb	protein_coding	1.20873	0.017286
ENSMUSG00000035764,5	Fbxo45	protein_coding	1.20859	0.0471404
ENSMUSG00000003452,11	Bicd1	protein_coding	1.20729	0.00953838
ENSMUSG00000017686,12	Rhot1	protein_coding	1.20696	0.0155029
ENSMUSG00000021706,10	Zfyve16	protein_coding	1.20678	0.0270803
ENSMUSG00000069539,7	Scyl2	protein_coding	1.20664	0.0117199
ENSMUSG00000048960,9	Prex2	protein_coding	1.2061	0.000909467
ENSMUSG00000026039,9	Sgol2	protein_coding	1.20585	0.0170833
ENSMUSG00000030978,9	Rrm1	protein_coding	1.20496	0.0144007
ENSMUSG00000039361,9	Picalm	protein_coding	1.20255	0.0441805
ENSMUSG00000055022,10	Cntn1	protein_coding	1.20237	0.00913982
ENSMUSG00000003623,4	Crot	protein_coding	1.20183	0.0170308
ENSMUSG00000027797,11	Dclk1	protein_coding	1.20165	0.00328576
ENSMUSG00000025934,11	Gsta3	protein_coding	1.20135	0.0212751
ENSMUSG00000037747,5	Phyhipl	protein_coding	1.20124	0.00459425
ENSMUSG00000041328,11	Pcf11	protein_coding	1.20085	0.019308
ENSMUSG00000042444,9	Fam63b	protein_coding	1.20076	0.0423043
ENSMUSG00000031553,11	Adam3	protein_coding	1.20024	0.0344449
ENSMUSG00000037119,3	D15Ertd621e	protein_coding	1.19954	0.000639339
ENSMUSG00000024887,9	Asah2	protein_coding	1.19922	0.00490004
ENSMUSG00000034401,12	Spata6	protein_coding	1.19909	0.0409322
ENSMUSG00000025609,11	Mkln1	protein_coding	1.19726	0.00173162
ENSMUSG00000031517,7	Gpm6a	protein_coding	1.19679	0.0344277
ENSMUSG00000025909,12	Sntg1	protein_coding	1.19666	0.00528198
ENSMUSG00000038187,10	Btbd10	protein_coding	1.19641	0.0335066
ENSMUSG00000025907,10	Rb1cc1	protein_coding	1.19613	0.00510742
ENSMUSG00000030691,10	Fchsd2	protein_coding	1.19596	0.00267485
ENSMUSG00000057182,10	Scn3a	protein_coding	1.19549	0.00403804
ENSMUSG00000022307,11	Oxr1	protein_coding	1.19413	0.00457064
ENSMUSG00000020024,6	Cep83	protein_coding	1.19351	0.0301552
ENSMUSG00000032355,12	Mlip	protein_coding	1.19251	0.00676832
ENSMUSG00000015002,12	Efr3a	protein_coding	1.19234	0.000498525
ENSMUSG00000025950,12	Idh1	protein_coding	1.19206	0.048094
ENSMUSG00000040514,5	4921511H03Rik	protein_coding	1.19178	0.0482807
ENSMUSG00000027361,11	Gabpb1	protein_coding	1.19173	0.0303098
ENSMUSG00000040549,12	Ckap5	protein_coding	1.19143	0.0105478
ENSMUSG00000034903,14	Cobll1	protein_coding	1.19129	0.00248438
ENSMUSG00000090112,4	Shprh	protein_coding	1.18996	0.00331421
ENSMUSG00000025199,12	Chuk	protein_coding	1.18986	0.00504496
ENSMUSG00000021585,8	Cast	protein_coding	1.18931	0.0428416
ENSMUSG00000011960,8	Ccnt1	protein_coding	1.18868	0.019614
ENSMUSG00000041124,10	Msantd4	protein_coding	1.18852	0.0396587
ENSMUSG00000041886,6	Macc1	protein_coding	1.18819	0.0282923
ENSMUSG00000057367,8	Birc2	protein_coding	1.18742	0.0355198
ENSMUSG00000029676,11	Pot1a	protein_coding	1.18725	0.0235414
ENSMUSG00000026600,8	Soat1	protein_coding	1.1869	0.00472261
ENSMUSG00000028226,11	Mmp16	protein_coding	1.18556	0.0285699
ENSMUSG00000043885,9	Slc36a4	protein_coding	1.18491	0.0229532
ENSMUSG00000071660,6	Ttc9c	protein_coding	1.18483	0.0231844
ENSMUSG00000028926,11	Cdk14	protein_coding	1.18255	0.00276832
ENSMUSG00000022905,8	Kpna1	protein_coding	1.18239	0.0108004
ENSMUSG00000061136,9	Prpf40a	protein_coding	1.18026	0.00675176
ENSMUSG00000027016,13	Zfp385b	protein_coding	1.17976	0.0250883
ENSMUSG00000052920,10	Prkg1	protein_coding	1.17884	0.00283343
ENSMUSG00000038679,12	Trps1	protein_coding	1.1777	0.00193207
ENSMUSG00000021843,12	Ktn1	protein_coding	1.1776	0.00393107
ENSMUSG00000010290,7	AI597479	protein_coding	1.17733	0.0439916
ENSMUSG00000007415,11	Gatad1	protein_coding	1.17615	0.0147328
ENSMUSG00000041406,10	BC055324	protein_coding	1.17595	0.0359877
ENSMUSG00000026594,10	Ralgps2	protein_coding	1.17328	0.00317475
ENSMUSG00000054770,12	Kctd18	protein_coding	1.17204	0.0115912
ENSMUSG00000022800,9	Fyttd1	protein_coding	1.17201	0.0410938
ENSMUSG00000026915,12	Strbp	protein_coding	1.17171	0.00190372
ENSMUSG00000041225,12	Arhgap12	protein_coding	1.171	0.0365623
ENSMUSG00000043019,8	Edem3	protein_coding	1.17018	0.0106598
ENSMUSG00000031885,9	Cbfb	protein_coding	1.17008	0.00528855
ENSMUSG00000026017,9	Carf	protein_coding	1.16925	0.00339888
ENSMUSG00000027809,10	Etfdh	protein_coding	1.16852	0.041775
ENSMUSG00000033918,11	Parl	protein_coding	1.1681	0.0220973
ENSMUSG00000026896,10	Ifih1	protein_coding	1.16755	0.0235561
ENSMUSG00000097393,3	D030068K23Rik	lincRNA	1.16744	0.0117909
ENSMUSG00000071532,6	Gm10335	processed_pseudogene	1.1669	0.0482807
ENSMUSG00000041236,7	Vps41	protein_coding	1.1667	0.0478247
ENSMUSG00000020459,10	Mtif2	protein_coding	1.16625	0.0320354
ENSMUSG00000092083,4	Kcnb2	protein_coding	1.1657	0.00244583
ENSMUSG00000046201,8	Scaf8	protein_coding	1.16425	0.00801831
ENSMUSG00000009907,13	Vps4b	protein_coding	1.16182	0.00538089
ENSMUSG00000036641,8	Ccdc148	protein_coding	1.16164	0.00238434
ENSMUSG00000039128,9	Cdc123	protein_coding	1.16051	0.0388196
ENSMUSG00000020716,11	Nf1	protein_coding	1.16046	0.00127578
ENSMUSG00000085558,3	4930412C18Rik	processed_transcript	1.15955	0.047447
ENSMUSG00000031314,13	Taf1	protein_coding	1.15939	0.0125847
ENSMUSG00000040389,11	Wdr47	protein_coding	1.15937	0.0222382
ENSMUSG00000033004,10	Mycbp2	protein_coding	1.15914	0.00104357
ENSMUSG00000061458,8	Nol10	protein_coding	1.15867	0.0422455
ENSMUSG00000020634,8	Ubxn2a	protein_coding	1.15855	0.0489028
ENSMUSG00000049421,9	Zfp260	protein_coding	1.15815	0.0359561
ENSMUSG00000019913,3	Sim1	protein_coding	1.15815	0.0244831
ENSMUSG00000018377,6	Vezf1	protein_coding	1.1576	0.0406065
ENSMUSG00000079465,4	Col4a3	protein_coding	1.1573	0.00217398
ENSMUSG00000029804,12	Herc3	protein_coding	1.15637	0.0353807
ENSMUSG00000028382,11	Ptbp3	protein_coding	1.15625	0.0148108
ENSMUSG00000031554,13	Adam5	protein_coding	1.15535	0.0381377
ENSMUSG00000029687,12	Ezh2	protein_coding	1.15526	0.0139123
ENSMUSG00000050840,8	Cdh20	protein_coding	1.15485	0.0472146
ENSMUSG00000063626,5	Unc5d	protein_coding	1.1547	0.0164523
ENSMUSG00000036834,12	Plch1	protein_coding	1.15411	0.0273765
ENSMUSG00000024694,5	Keg1	protein_coding	1.1536	0.00760934
ENSMUSG00000091415,4	Ak9	protein_coding	1.14984	0.00249429
ENSMUSG00000026709,6	Dars2	protein_coding	1.14939	0.0388436
ENSMUSG00000026586,12	Prrx1	protein_coding	1.14925	0.0125833
ENSMUSG00000025986,6	Slc39a10	protein_coding	1.14881	0.0330883
ENSMUSG00000055737,8	Ghr	protein_coding	1.14856	0.00434064
ENSMUSG00000004127,8	Trmt10a	protein_coding	1.14844	0.0114892
ENSMUSG00000020594,10	Pum2	protein_coding	1.14836	0.0123017
ENSMUSG00000018501,13	Ncor1	protein_coding	1.14823	0.00143293
ENSMUSG00000035916,7	Ptprq	protein_coding	1.14759	0.0107642
ENSMUSG00000094989,1	Rpl9-ps4	processed_pseudogene	1.14753	0.00953531
ENSMUSG00000067336,6	Bmpr2	protein_coding	1.14661	0.00120376
ENSMUSG00000040383,12	Aqr	protein_coding	1.14556	0.00393107
ENSMUSG00000037101,12	Ttc29	protein_coding	1.14459	0.0207062
ENSMUSG00000030309,12	Caprin2	protein_coding	1.14445	0.0285448
ENSMUSG00000029685,11	Asb15	protein_coding	1.14177	0.0440012
ENSMUSG00000035181,5	Heatr5a	protein_coding	1.14109	0.00922583
ENSMUSG00000052534,11	Pbx1	protein_coding	1.14076	0.00151649
ENSMUSG00000042581,10	Thsd7b	protein_coding	1.14005	0.0050076
ENSMUSG00000032369,9	Plscr1	protein_coding	1.13931	0.0476617
ENSMUSG00000026771,10	Spopl	protein_coding	1.13789	0.0194563
ENSMUSG00000021188,10	Trip11	protein_coding	1.13698	0.00361428
ENSMUSG00000025453,12	Nnt	protein_coding	1.13598	0.0277139
ENSMUSG00000021701,7	Plk2	protein_coding	1.13582	0.0226449
ENSMUSG00000029263,11	Pigg	protein_coding	1.1357	0.035311
ENSMUSG00000034303,6	Ccdc15	protein_coding	1.13399	0.00720155
ENSMUSG00000005583,12	Mef2c	protein_coding	1.13383	0.036363
ENSMUSG00000022833,6	Ccdc14	protein_coding	1.13378	0.0269556
ENSMUSG00000022884,10	Eif4a2	protein_coding	1.13359	0.0318806
ENSMUSG00000056919,9	Cep162	protein_coding	1.13352	0.00446809
ENSMUSG00000026568,6	Mpc2	protein_coding	1.1331	0.0132274
ENSMUSG00000041229,11	Phf8	protein_coding	1.13267	0.0269556
ENSMUSG00000037236,10	Matr3	protein_coding	1.13227	0.0137447
ENSMUSG00000022781,8	Pak2	protein_coding	1.12957	0.00664253
ENSMUSG00000022370,9	Mrpl13	protein_coding	1.12839	0.020789
ENSMUSG00000070565,7	Rasal2	protein_coding	1.12783	0.00385943
ENSMUSG00000044156,10	Hepacam2	protein_coding	1.12759	0.0473581
ENSMUSG00000046111,12	Cep295	protein_coding	1.12742	0.00731249
ENSMUSG00000019907,9	Ppp1r12a	protein_coding	1.12713	0.0113465
ENSMUSG00000038047,14	Haus6	protein_coding	1.12665	0.0439916
ENSMUSG00000037860,11	Aim2	protein_coding	1.12603	0.0450222
ENSMUSG00000055240,12	Zfp101	protein_coding	1.12539	0.0163196
ENSMUSG00000025892,11	Gria4	protein_coding	1.12533	0.0112556
ENSMUSG00000022629,12	Kif21a	protein_coding	1.12431	0.0159928
ENSMUSG00000020986,9	Sec23a	protein_coding	1.12353	0.0339566
ENSMUSG00000021027,11	Ralgapa1	protein_coding	1.12221	0.0196363
ENSMUSG00000027469,12	Tpx2	protein_coding	1.1222	0.0123703
ENSMUSG00000069170,9	Gpr98	protein_coding	1.12211	0.00317632
ENSMUSG00000026349,10	Ccnt2	protein_coding	1.1209	0.0123981
ENSMUSG00000067851,7	Arfgef1	protein_coding	1.12073	0.0138132
ENSMUSG00000041303,7	Gtf3c3	protein_coding	1.1202	0.0409186
ENSMUSG00000026730,8	Pter	protein_coding	1.11979	0.0456725
ENSMUSG00000032570,12	Atp2c1	protein_coding	1.11953	0.0154487
ENSMUSG00000026109,10	Tmeff2	protein_coding	1.11951	0.0239557
ENSMUSG00000021911,11	Parg	protein_coding	1.11905	0.0444299
ENSMUSG00000087022,4	9130024F11Rik	processed_transcript	1.11883	0.0275313
ENSMUSG00000018341,8	Il12rb2	protein_coding	1.11876	0.03326
ENSMUSG00000037487,6	Ubr5	protein_coding	1.11872	0.00158669
ENSMUSG00000028556,11	Dock7	protein_coding	1.11809	0.0106261
ENSMUSG00000040614,10	Nlrp9c	protein_coding	1.11804	0.0411458
ENSMUSG00000037788,10	Vopp1	protein_coding	1.11739	0.0216491
ENSMUSG00000051177,12	Plcb1	protein_coding	1.11708	0.00912937
ENSMUSG00000014496,7	Ankrd28	protein_coding	1.11668	0.0263354
ENSMUSG00000023068,10	Nus1	protein_coding	1.11663	0.033763
ENSMUSG00000038225,10	Primpol	protein_coding	1.11557	0.0104873
ENSMUSG00000026739,9	Bmi1	protein_coding	1.11513	0.0461713
ENSMUSG00000027210,16	Meis2	protein_coding	1.11471	0.0230863
ENSMUSG00000028082,9	Sh3d19	protein_coding	1.11377	0.00716774
ENSMUSG00000050555,9	Hyls1	protein_coding	1.1137	0.0275467
ENSMUSG00000039831,12	Arhgap29	protein_coding	1.11368	0.0457009
ENSMUSG00000039488,11	Cntn5	protein_coding	1.1128	0.00654895
ENSMUSG00000021905,9	Dph3	protein_coding	1.11279	0.0271759
ENSMUSG00000039891,6	Txlnb	protein_coding	1.10901	0.0158411
ENSMUSG00000026834,9	Acvr1c	protein_coding	1.10864	0.0220367
ENSMUSG00000003847,12	Nfat5	protein_coding	1.10809	0.00246481
ENSMUSG00000023964,11	Calcr	protein_coding	1.10787	0.0437994
ENSMUSG00000094483,2	Purb	protein_coding	1.10711	0.0148216
ENSMUSG00000038084,12	Opa1	protein_coding	1.10618	0.0118513
ENSMUSG00000045932,8	Ifit2	protein_coding	1.10607	0.0342703
ENSMUSG00000001173,11	Ocrl	protein_coding	1.10374	0.0474734
ENSMUSG00000028771,9	Ptpn12	protein_coding	1.10286	0.0460809
ENSMUSG00000059173,15	Pde1a	protein_coding	1.10267	0.0162231
ENSMUSG00000034593,12	Myo5a	protein_coding	1.10237	0.00424835
ENSMUSG00000025078,8	Nhlrc2	protein_coding	1.10167	0.014042
ENSMUSG00000023043,6	Krt18	protein_coding	1.10128	0.0282261
ENSMUSG00000037709,9	Fam13a	protein_coding	1.10109	0.0320354
ENSMUSG00000036087,14	Slain2	protein_coding	1.10079	0.0132567
ENSMUSG00000043131,10	Mob1a	protein_coding	1.10025	0.0465941
ENSMUSG00000005897,10	Nr2c1	protein_coding	1.10015	0.0415684
ENSMUSG00000097263,1	Gm26804	lincRNA	1.09988	0.0114202
ENSMUSG00000022272,13	Myo10	protein_coding	1.09987	0.0389325
ENSMUSG00000029647,11	Pan3	protein_coding	1.09956	0.00423198
ENSMUSG00000102136,1	RP23-416H10,6	sense_intronic	1.09896	0.0448922
ENSMUSG00000047022,14	Mipol1	protein_coding	1.09882	0.0291954
ENSMUSG00000026674,5	Ddr2	protein_coding	1.09857	0.00307292
ENSMUSG00000031555,9	Adam9	protein_coding	1.09817	0.0137167
ENSMUSG00000033773,10	Rpap2	protein_coding	1.09815	0.0388745
ENSMUSG00000004668,10	Abca13	protein_coding	1.09797	0.00287014
ENSMUSG00000023940,10	Sgol1	protein_coding	1.09736	0.0404387
ENSMUSG00000037370,9	Enpp1	protein_coding	1.09686	0.00874424
ENSMUSG00000043262,10	Uevld	protein_coding	1.09681	0.0311445
ENSMUSG00000007029,12	Vars	protein_coding	1.09626	0.0289319
ENSMUSG00000019726,10	Lyst	protein_coding	1.09495	0.0056785
ENSMUSG00000043241,10	Upf2	protein_coding	1.09494	0.00558274
ENSMUSG00000024811,7	Tnks2	protein_coding	1.0949	0.00817104
ENSMUSG00000052479,5	A330008L17Rik	protein_coding	1.09484	0.0487603
ENSMUSG00000000804,10	Usp32	protein_coding	1.09476	0.0112998
ENSMUSG00000038822,11	Hace1	protein_coding	1.09254	0.00811824
ENSMUSG00000026019,11	Wdr12	protein_coding	1.09236	0.00391567
ENSMUSG00000027971,12	Ndst4	protein_coding	1.09183	0.0460639
ENSMUSG00000019775,13	Rgs17	protein_coding	1.09164	0.0439916
ENSMUSG00000026784,10	Pdss1	protein_coding	1.09089	0.045823
ENSMUSG00000025991,8	Cps1	protein_coding	1.09073	0.0278779
ENSMUSG00000030753,11	Prkrir	protein_coding	1.09031	0.0361408
ENSMUSG00000056758,10	Hmga2	protein_coding	1.08892	0.00921189
ENSMUSG00000025982,9	Sf3b1	protein_coding	1.08837	0.0139088
ENSMUSG00000024070,11	Prkd3	protein_coding	1.08745	0.00519792
ENSMUSG00000039375,12	Wdr17	protein_coding	1.08665	0.0161869
ENSMUSG00000020859,12	Spag9	protein_coding	1.08587	0.00586984
ENSMUSG00000024073,10	Birc6	protein_coding	1.08524	0.00208962
ENSMUSG00000028907,7	Utp11l	protein_coding	1.08503	0.0415732
ENSMUSG00000073640,2	Rpl27-ps3	protein_coding	1.08458	0.0306927
ENSMUSG00000035126,15	Wdr78	protein_coding	1.08388	0.0262747
ENSMUSG00000024758,10	Rtn3	protein_coding	1.08354	0.0171306
ENSMUSG00000032116,13	Stt3a	protein_coding	1.08334	0.00205242
ENSMUSG00000041997,12	Tlk1	protein_coding	1.08167	0.0318679
ENSMUSG00000026042,12	Col5a2	protein_coding	1.08132	0.0244482
ENSMUSG00000030254,12	Rad18	protein_coding	1.08055	0.0367123
ENSMUSG00000029534,13	St7	protein_coding	1.0805	0.0138134
ENSMUSG00000022141,6	Nipbl	protein_coding	1.0789	0.00293953
ENSMUSG00000024976,9	Shoc2	protein_coding	1.07695	0.0218406
ENSMUSG00000090386,5	Mir99ahg	processed_transcript	1.07669	0.0250418
ENSMUSG00000032342,9	Mto1	protein_coding	1.07532	0.0363002
ENSMUSG00000004364,10	Cul3	protein_coding	1.07361	0.0380054
ENSMUSG00000025616,10	Usp16	protein_coding	1.07321	0.0150147
ENSMUSG00000028399,13	Ptprd	protein_coding	1.0727	0.0105004
ENSMUSG00000021395,10	Spin1	protein_coding	1.07236	0.0421593
ENSMUSG00000020130,8	Tbc1d15	protein_coding	1.07226	0.0490353
ENSMUSG00000056267,10	Cep70	protein_coding	1.07194	0.0390226
ENSMUSG00000048764,12	Tmprss11f	protein_coding	1.07141	0.0354708
ENSMUSG00000038095,11	Sbno1	protein_coding	1.07063	0.0250688
ENSMUSG00000029338,9	Antxr2	protein_coding	1.06909	0.0186486
ENSMUSG00000064061,9	Dzip3	protein_coding	1.06837	0.0367723
ENSMUSG00000024727,8	Trpm6	protein_coding	1.06802	0.00172877
ENSMUSG00000026768,6	Itga8	protein_coding	1.06779	0.0157841
ENSMUSG00000019846,7	Lama4	protein_coding	1.06612	0.0131864
ENSMUSG00000005802,8	Slc30a4	protein_coding	1.06557	0.0250194
ENSMUSG00000024659,10	Anxa1	protein_coding	1.0654	0.0461972
ENSMUSG00000099930,1	Gm2396	processed_transcript	1.06492	0.049305
ENSMUSG00000014349,7	Ube2z	protein_coding	1.06387	0.0267614
ENSMUSG00000006740,9	Kif5b	protein_coding	1.06308	0.0499007
ENSMUSG00000024498,11	Tcerg1	protein_coding	1.06307	0.0357446
ENSMUSG00000046138,10	9930021J03Rik	protein_coding	1.06204	0.00997632
ENSMUSG00000009535,9	Rnmt	protein_coding	1.06179	0.0453035
ENSMUSG00000008575,13	Nfib	protein_coding	1.06148	0.0128257
ENSMUSG00000021282,12	Eif5	protein_coding	1.06038	0.0262825
ENSMUSG00000075316,7	Scn9a	protein_coding	1.06021	0.0279426
ENSMUSG00000036550,11	Cnot1	protein_coding	1.05804	0.0102954
ENSMUSG00000040720,11	1110037F02Rik	protein_coding	1.05772	0.0283465
ENSMUSG00000040297,8	Suco	protein_coding	1.05772	0.0286968
ENSMUSG00000006005,13	Tpr	protein_coding	1.05764	0.00393641
ENSMUSG00000022360,7	Atad2	protein_coding	1.05729	0.00263263
ENSMUSG00000052516,13	Robo2	protein_coding	1.05649	0.0275313
ENSMUSG00000030228,11	Pik3c2g	protein_coding	1.056	0.0120127
ENSMUSG00000019988,6	Nedd1	protein_coding	1.05595	0.0456326
ENSMUSG00000042567,15	Nek10	protein_coding	1.05563	0.0133115
ENSMUSG00000101337,2	Dnah7c	protein_coding	1.05534	0.00633723
ENSMUSG00000025762,10	Larp1b	protein_coding	1.05526	0.0275603
ENSMUSG00000040850,13	Psme4	protein_coding	1.05493	0.0149698
ENSMUSG00000029286,8	Enam	protein_coding	1.05492	0.0229621
ENSMUSG00000051396,10	Hspa14	protein_coding	1.05474	0.0209836
ENSMUSG00000029422,10	Rsrc2	protein_coding	1.05466	0.0203631
ENSMUSG00000024795,10	Kif20b	protein_coding	1.05457	0.00888815
ENSMUSG00000022100,9	Xpo7	protein_coding	1.05378	0.00896663
ENSMUSG00000037110,15	Ralgapa2	protein_coding	1.05344	0.00297987
ENSMUSG00000006932,12	Ctnnb1	protein_coding	1.05137	0.0138202
ENSMUSG00000032228,12	Tcf12	protein_coding	1.05064	0.0087386
ENSMUSG00000025197,8	Cyp2c44	protein_coding	1.05045	0.0438781
ENSMUSG00000034009,10	Rxfp1	protein_coding	1.05037	0.0188122
ENSMUSG00000030451,11	Herc2	protein_coding	1.05036	0.00271604
ENSMUSG00000005800,2	Mmp8	protein_coding	1.05019	0.0335694
ENSMUSG00000036097,7	Fam178a	protein_coding	1.04942	0.00500531
ENSMUSG00000017146,8	Brca1	protein_coding	1.04884	0.00771586
ENSMUSG00000037533,13	Rapgef6	protein_coding	1.04801	0.00715573
ENSMUSG00000031864,11	Ints10	protein_coding	1.0473	0.0200478
ENSMUSG00000027243,8	Harbi1	protein_coding	1.04728	0.0464365
ENSMUSG00000054717,6	Hmgb2	protein_coding	1.04716	0.00654895
ENSMUSG00000026036,13	Nif3l1	protein_coding	1.04521	0.0315486
ENSMUSG00000027641,9	Rbl1	protein_coding	1.04444	0.0148108
ENSMUSG00000026193,11	Fn1	protein_coding	1.04409	0.00541982
ENSMUSG00000041670,11	Rims1	protein_coding	1.04373	0.0152031
ENSMUSG00000047193,11	Dync2h1	protein_coding	1.04333	0.0127228
ENSMUSG00000022865,9	Cxadr	protein_coding	1.04282	0.0212602
ENSMUSG00000051329,9	Nup160	protein_coding	1.04229	0.0177897
ENSMUSG00000039100,9	March6	protein_coding	1.04187	0.0138046
ENSMUSG00000027184,10	Caprin1	protein_coding	1.0418	0.0138132
ENSMUSG00000027520,11	Zdbf2	protein_coding	1.04157	0.0163185
ENSMUSG00000034724,13	Cnot6l	protein_coding	1.04134	0.0235303
ENSMUSG00000033943,11	Mga	protein_coding	1.04131	0.00776075
ENSMUSG00000035311,12	Gnptab	protein_coding	1.04119	0.011922
ENSMUSG00000022231,9	Sema5a	protein_coding	1.04088	0.00751839
ENSMUSG00000038014,7	Fam120a	protein_coding	1.04063	0.0433511
ENSMUSG00000042508,12	Dmtf1	protein_coding	1.03983	0.0258282
ENSMUSG00000032050,12	Rdx	protein_coding	1.03951	0.0264335
ENSMUSG00000026361,8	Cdc73	protein_coding	1.03856	0.0159747
ENSMUSG00000026374,10	Tsn	protein_coding	1.03837	0.0442176
ENSMUSG00000036104,7	Rab3gap1	protein_coding	1.03781	0.0141383
ENSMUSG00000024241,6	Sos1	protein_coding	1.03759	0.00842082
ENSMUSG00000026134,11	Prim2	protein_coding	1.0369	0.024224
ENSMUSG00000043535,9	Setx	protein_coding	1.03445	0.00980719
ENSMUSG00000068587,6	Mgam	protein_coding	1.03433	0.0264489
ENSMUSG00000032332,13	Col12a1	protein_coding	1.03359	0.00599934
ENSMUSG00000056536,10	Pign	protein_coding	1.03352	0.0164663
ENSMUSG00000033282,9	Rpgrip1l	protein_coding	1.0324	0.018098
ENSMUSG00000021972,10	Hmbox1	protein_coding	1.03202	0.0354258
ENSMUSG00000034218,11	Atm	protein_coding	1.03074	0.00990484
ENSMUSG00000039967,10	Zfp292	protein_coding	1.03036	0.0320354
ENSMUSG00000049252,13	Lrp1b	protein_coding	1.03031	0.00513621
ENSMUSG00000027536,6	Chmp4c	protein_coding	1.03	0.0378851
ENSMUSG00000074733,10	5830428H23Rik	processed_transcript	1.02872	0.0263218
ENSMUSG00000027957,9	Slc35a3	protein_coding	1.02659	0.0295004
ENSMUSG00000053153,10	Spag16	protein_coding	1.02607	0.0171087
ENSMUSG00000063698,5	Sfxn4	protein_coding	1.02511	0.0342331
ENSMUSG00000049103,9	Ccr2	protein_coding	1.02452	0.0348556
ENSMUSG00000047747,9	Rnf150	protein_coding	1.02426	0.00670672
ENSMUSG00000043760,12	Pkhd1	protein_coding	1.02367	0.00387215
ENSMUSG00000067242,7	Lgi1	protein_coding	1.02288	0.0140692
ENSMUSG00000024924,10	Vldlr	protein_coding	1.02269	0.00476785
ENSMUSG00000033306,10	Lpp	protein_coding	1.02252	0.00636863
ENSMUSG00000039000,4	Ube3c	protein_coding	1.02207	0.0254279
ENSMUSG00000049076,9	Acap2	protein_coding	1.02117	0.0375375
ENSMUSG00000027598,12	Itch	protein_coding	1.01949	0.0251381
ENSMUSG00000041570,10	Camsap2	protein_coding	1.01828	0.00725009
ENSMUSG00000026705,12	Klhl20	protein_coding	1.01816	0.00896845
ENSMUSG00000027684,12	Mecom	protein_coding	1.01625	0.0108113
ENSMUSG00000061080,7	Lsamp	protein_coding	1.01606	0.0263354
ENSMUSG00000019899,11	Lama2	protein_coding	1.0156	0.00663414
ENSMUSG00000024757,7	Slc22a19	protein_coding	1.01523	0.0162231
ENSMUSG00000102408,1	RP23-187M7,3	lincRNA	1.0148	0.0273631
ENSMUSG00000034610,10	Zcchc11	protein_coding	1.01471	0.0443807
ENSMUSG00000050296,10	Abca12	protein_coding	1.0141	0.00498249
ENSMUSG00000023927,11	Satb1	protein_coding	1.0138	0.0111089
ENSMUSG00000020841,5	Cpd	protein_coding	1.01219	0.0214403
ENSMUSG00000032547,8	Ryk	protein_coding	1.01147	0.0387319
ENSMUSG00000026510,10	Trp53bp2	protein_coding	1.01109	0.046293
ENSMUSG00000005204,8	Senp3	protein_coding	1.00917	0.0424115
ENSMUSG00000038388,10	Mpp6	protein_coding	1.00878	0.0336532
ENSMUSG00000032555,5	Topbp1	protein_coding	1.0078	0.0051932
ENSMUSG00000020160,14	Meis1	protein_coding	1.00757	0.0468335
ENSMUSG00000072501,4	Phf20l1	protein_coding	1.0059	0.00462705
ENSMUSG00000013663,7	Pten	protein_coding	1.00546	0.0198861
ENSMUSG00000026616,10	Cr2	protein_coding	1.00489	0.0303356
ENSMUSG00000066842,14	Hmcn1	protein_coding	1.00474	0.00827333
ENSMUSG00000030465,14	Psd3	protein_coding	1.00235	0.00737391
ENSMUSG00000008730,13	Hipk1	protein_coding	1.00226	0.0170814
ENSMUSG00000022361,10	Zhx1	protein_coding	1.00205	0.019278
ENSMUSG00000074802,6	Gas2l3	protein_coding	1.00156	0.0244482
ENSMUSG00000024759,9	Atl3	protein_coding	1.0013	0.0100521
ENSMUSG00000026610,9	Esrrg	protein_coding	1.00105	0.0258409
ENSMUSG00000030621,13	Me3	protein_coding	1.00055	0.0113259

## Sheet: Sheet_c
RNAs overexpressed in EVs from 4T1 shCtl cells Vs EVs from shRalB cells (padj<0,05; Log2FC>1)
RNA ID	symbol	genetype	log2FoldChange	padj
ENSMUSG00000076258,1	Gm23935	miRNA	3.00306	0.000161389
ENSMUSG00000073640,2	Rpl27-ps3	protein_coding	2.9584	6.29988e-06
ENSMUSG00000020803,3	Txndc17	protein_coding	2.91468	0.000103865
ENSMUSG00000094265,1	n-R5s109	rRNA	2.91372	0.000419963
ENSMUSG00000007892,7	Rplp1	protein_coding	2.90504	0.00014234
ENSMUSG00000102117,1	Rpsa-ps1	processed_pseudogene	2.89853	6.08654e-05
ENSMUSG00000098973,1	Mir6236	miRNA	2.8299	6.18582e-05
ENSMUSG00000067344,7	Rps25-ps1	processed_pseudogene	2.79987	0.000269882
ENSMUSG00000044533,11	Rps2	protein_coding	2.79904	0.000556905
ENSMUSG00000095073,1	n-R5s101	rRNA	2.76802	0.000705057
ENSMUSG00000024914,12	Drap1	protein_coding	2.74414	1.20351e-05
ENSMUSG00000020821,13	Kif1c	protein_coding	2.73671	7.28284e-06
ENSMUSG00000042558,12	Adprhl2	protein_coding	2.68966	0.000159923
ENSMUSG00000093112,2	Gm22701	misc_RNA	2.68794	2.11633e-05
ENSMUSG00000084883,1	Ccdc85c	protein_coding	2.67449	8.29043e-05
ENSMUSG00000097906,1	Gm9625	processed_pseudogene	2.63156	0.00119888
ENSMUSG00000065145,1	Vaultrc5	misc_RNA	2.61806	0.000657686
ENSMUSG00000001098,11	Kctd10	protein_coding	2.61506	0.00020371
ENSMUSG00000088246,1	Gm25911	miRNA	2.5869	0.000445799
ENSMUSG00000081051,4	Gm15427	processed_pseudogene	2.57785	0.000665999
ENSMUSG00000099021,1	Gm22405	misc_RNA	2.57246	0.000663863
ENSMUSG00000095276,1	Gfy	protein_coding	2.52962	0.00188232
ENSMUSG00000087943,1	Gm24245	miRNA	2.52808	0.000485184
ENSMUSG00000080875,3	Gm7332	processed_pseudogene	2.52262	0.00220504
ENSMUSG00000020219,6	Timm13	protein_coding	2.51717	0.00141091
ENSMUSG00000053617,7	Sh3pxd2a	protein_coding	2.51702	6.18582e-05
ENSMUSG00000035397,8	Klf16	protein_coding	2.51624	0.00018903
ENSMUSG00000093283,1	Gm22567	misc_RNA	2.50188	0.00017844
ENSMUSG00000067038,5	Rps12-ps3	protein_coding	2.49473	0.000734052
ENSMUSG00000092837,1	Rpph1	misc_RNA	2.48837	0.000501659
ENSMUSG00000056612,6	Ppp1r14b	protein_coding	2.48475	0.00198037
ENSMUSG00000094830,1	n-R5s194	rRNA	2.45384	0.000186413
ENSMUSG00000093960,1	n-R5s127	rRNA	2.45371	0.00411603
ENSMUSG00000099250,1	Gm26191	misc_RNA	2.45277	0.00107596
ENSMUSG00000060981,6	Hist1h4h	protein_coding	2.45139	0.00181391
ENSMUSG00000045694,4	Gm4997	processed_pseudogene	2.42512	0.00629664
ENSMUSG00000028786,11	Tmem54	protein_coding	2.42479	0.000447359
ENSMUSG00000069274,3	Hist1h4f	protein_coding	2.40601	0.0046343
ENSMUSG00000093183,2	Gm25687	misc_RNA	2.39832	0.0003992
ENSMUSG00000065018,1	Gm23511	snRNA	2.38027	0.00471065
ENSMUSG00000033020,6	Polr2f	protein_coding	2.37609	0.00063382
ENSMUSG00000035203,11	Epn1	protein_coding	2.3741	6.13186e-06
ENSMUSG00000092746,2	Gm22179	misc_RNA	2.36931	0.000635864
ENSMUSG00000009293,13	Ube2g2	protein_coding	2.36135	0.000188737
ENSMUSG00000096979,1	Gm26880	lincRNA	2.35531	0.000248089
ENSMUSG00000082536,1	Gm13456	processed_pseudogene	2.34957	0.00263524
ENSMUSG00000102997,1	RP23-138L21,3	TEC	2.34144	0.00451462
ENSMUSG00000081251,1	Gm12164	processed_pseudogene	2.34136	0.00198037
ENSMUSG00000093056,2	Gm24812	misc_RNA	2.33651	0.00334165
ENSMUSG00000005057,9	Sh2b2	protein_coding	2.32339	0.000208603
ENSMUSG00000074800,3	Gm4149	pseudogene	2.31096	0.00290362
ENSMUSG00000003970,8	Rpl8	protein_coding	2.3103	0.00258689
ENSMUSG00000081434,3	Gm14165	processed_pseudogene	2.30449	0.00253603
ENSMUSG00000018102,4	Hist1h2bc	protein_coding	2.28209	0.00792341
ENSMUSG00000063696,6	Gm8730	protein_coding	2.27014	0.00510086
ENSMUSG00000068079,5	Tcf15	protein_coding	2.26775	0.00579987
ENSMUSG00000052837,5	Junb	protein_coding	2.26286	0.000417394
ENSMUSG00000063457,10	Rps15	protein_coding	2.26003	0.00632886
ENSMUSG00000058542,3	Gm15590	processed_pseudogene	2.25557	0.00392351
ENSMUSG00000090544,2	Gm6576	protein_coding	2.25513	0.00398322
ENSMUSG00000064748,1	n-R5s28	rRNA	2.24392	0.00205239
ENSMUSG00000087244,1	Gm7284	unprocessed_pseudogene	2.24336	0.0023007
ENSMUSG00000083337,1	Gm11539	processed_pseudogene	2.24249	0.00936602
ENSMUSG00000062031,8	Athl1	protein_coding	2.23786	0.00315082
ENSMUSG00000076281,1	Gm24270	miRNA	2.23354	0.000834182
ENSMUSG00000092898,1	Gm23806	rRNA	2.23183	0.000498721
ENSMUSG00000002504,10	Slc9a3r2	protein_coding	2.23096	0.000587697
ENSMUSG00000064945,1	Rny3	misc_RNA	2.22906	0.00127407
ENSMUSG00000020519,5	Sap30l	protein_coding	2.22758	0.000785865
ENSMUSG00000065911,1	Gm24447	misc_RNA	2.22177	0.00500204
ENSMUSG00000092702,2	Gm24514	misc_RNA	2.20697	0.00463475
ENSMUSG00000031848,10	Lsm4	protein_coding	2.19323	0.00208005
ENSMUSG00000081684,4	Rps2-ps13	processed_pseudogene	2.19112	0.00731007
ENSMUSG00000092805,2	Gm26461	misc_RNA	2.18948	0.00308707
ENSMUSG00000068220,5	Lgals1	protein_coding	2.18494	0.00910434
ENSMUSG00000026272,6	Agxt	protein_coding	2.17456	0.00422738
ENSMUSG00000074412,4	Gm10689	processed_pseudogene	2.1727	0.011736
ENSMUSG00000094344,1	Gm11942	processed_pseudogene	2.16836	0.0123963
ENSMUSG00000080921,4	Rpl38-ps2	processed_pseudogene	2.15971	0.0147538
ENSMUSG00000090230,1	Gm16315	antisense	2.15654	0.00332917
ENSMUSG00000029649,7	Pomp	protein_coding	2.15217	0.00386949
ENSMUSG00000025208,8	Mrpl43	protein_coding	2.15079	0.00245751
ENSMUSG00000044424,3	Gm9493	protein_coding	2.14643	0.00881212
ENSMUSG00000082121,1	Gm8199	processed_pseudogene	2.14494	0.0140118
ENSMUSG00000060260,8	Pwwp2b	protein_coding	2.14434	0.000464038
ENSMUSG00000060143,6	Gm10076	protein_coding	2.13226	0.010599
ENSMUSG00000083907,1	Plk-ps1	processed_pseudogene	2.12991	0.00473502
ENSMUSG00000091735,2	Gpr62	protein_coding	2.12259	0.00322199
ENSMUSG00000020167,10	Tcf3	protein_coding	2.12172	7.28284e-06
ENSMUSG00000037989,11	Wnk2	protein_coding	2.11996	2.30604e-06
ENSMUSG00000098641,1	Rnu3b4	snoRNA	2.11924	0.0101267
ENSMUSG00000024608,6	Rps14	protein_coding	2.11538	0.00902179
ENSMUSG00000082480,1	Gm11687	processed_pseudogene	2.11488	0.00770606
ENSMUSG00000102189,1	RP23-448H3,2	TEC	2.11384	0.0064574
ENSMUSG00000071655,7	Ubxn1	protein_coding	2.11125	0.000285088
ENSMUSG00000096942,1	Rps19-ps6	processed_pseudogene	2.11069	0.0122981
ENSMUSG00000019428,12	Fkbp8	protein_coding	2.10947	8.29043e-05
ENSMUSG00000096188,1	Cmtm4	protein_coding	2.10844	0.000147961
ENSMUSG00000067370,3	B3galt4	protein_coding	2.10213	0.0064327
ENSMUSG00000062382,7	Gm10116	protein_coding	2.10056	0.00804712
ENSMUSG00000087075,1	A230065H16Rik	protein_coding	2.09875	0.00717592
ENSMUSG00000078249,5	Hmga1-rs1	protein_coding	2.09807	0.000724586
ENSMUSG00000059070,10	Rpl18	protein_coding	2.09671	0.00876681
ENSMUSG00000071195,3	Gm10318	unprocessed_pseudogene	2.08847	0.0110937
ENSMUSG00000042759,8	Apobr	protein_coding	2.08191	0.00020135
ENSMUSG00000043430,5	Psapl1	protein_coding	2.07976	0.00197074
ENSMUSG00000003345,11	Csnk1g2	protein_coding	2.07602	8.28266e-05
ENSMUSG00000078815,4	Cacng6	protein_coding	2.07477	0.00847415
ENSMUSG00000064247,10	Plcxd1	protein_coding	2.07472	0.0012387
ENSMUSG00000069833,8	Ahnak	protein_coding	2.07243	0.000978123
ENSMUSG00000025967,12	Eef1b2	protein_coding	2.07079	0.00344542
ENSMUSG00000022565,11	Plec	protein_coding	2.06845	0.00117879
ENSMUSG00000009863,10	Sdhb	protein_coding	2.0657	0.000761353
ENSMUSG00000088148,1	Mir1983	miRNA	2.06474	0.011046
ENSMUSG00000074406,4	Zfp628	protein_coding	2.06077	0.000103865
ENSMUSG00000032518,5	Rpsa	protein_coding	2.05065	0.000152514
ENSMUSG00000042821,7	Snai1	protein_coding	2.04557	0.00529257
ENSMUSG00000087775,1	Rprl2	misc_RNA	2.0454	0.0119701
ENSMUSG00000096847,1	Tmem151b	protein_coding	2.04515	0.000148139
ENSMUSG00000023906,2	Cldn6	protein_coding	2.04407	0.00425667
ENSMUSG00000024769,7	Cdc42bpg	protein_coding	2.04404	1.30427e-05
ENSMUSG00000023043,6	Krt18	protein_coding	2.04106	7.42252e-05
ENSMUSG00000041736,6	Tspo	protein_coding	2.04101	0.0109902
ENSMUSG00000035202,7	Lars2	protein_coding	2.04033	0.00183786
ENSMUSG00000096205,1	Gm22068	snRNA	2.04026	0.000630118
ENSMUSG00000002980,10	Bcam	protein_coding	2.03948	0.000186413
ENSMUSG00000024661,6	Fth1	protein_coding	2.03859	0.00510086
ENSMUSG00000008855,13	Hdac5	protein_coding	2.03611	2.72034e-06
ENSMUSG00000082108,3	Gm13777	processed_pseudogene	2.03481	0.00808322
ENSMUSG00000040447,11	Spns2	protein_coding	2.02906	7.99432e-06
ENSMUSG00000037185,8	Krt80	protein_coding	2.02864	0.00342809
ENSMUSG00000032436,12	Cmtm7	protein_coding	2.0282	0.00411603
ENSMUSG00000045039,9	Megf8	protein_coding	2.02698	2.08406e-07
ENSMUSG00000102380,1	RP23-393C3,4	TEC	2.02359	0.00280507
ENSMUSG00000031662,7	Snx20	protein_coding	2.02257	0.016809
ENSMUSG00000082697,1	Gm12913	processed_pseudogene	2.01554	0.0131837
ENSMUSG00000063605,5	Ccdc102a	protein_coding	2.01233	7.99432e-06
ENSMUSG00000059064,7	Gm10059	processed_pseudogene	2.00904	0.00141091
ENSMUSG00000038451,9	Spsb2	protein_coding	2.00653	0.00676675
ENSMUSG00000072487,6	Mroh5	protein_coding	2.00319	7.28284e-06
ENSMUSG00000083716,4	Gm13436	processed_pseudogene	2.00264	0.0121875
ENSMUSG00000100829,1	Gm29510	lincRNA	2.00123	0.0168644
ENSMUSG00000037548,10	H2-DMb2	protein_coding	1.99717	0.00150393
ENSMUSG00000004891,12	Nes	protein_coding	1.9925	7.28284e-06
ENSMUSG00000074886,6	Grk6	protein_coding	1.99244	0.000241161
ENSMUSG00000079654,3	Prrt4	protein_coding	1.99013	0.00159899
ENSMUSG00000039787,9	Cercam	protein_coding	1.99013	0.000705057
ENSMUSG00000042106,5	Fam212a	protein_coding	1.98916	0.0115713
ENSMUSG00000038274,7	Fau	protein_coding	1.98777	0.00831411
ENSMUSG00000028980,10	H6pd	protein_coding	1.98366	0.000166429
ENSMUSG00000082013,1	Gm13216	processed_pseudogene	1.98125	0.0160774
ENSMUSG00000086555,1	Gm13446	processed_transcript	1.97951	0.0211118
ENSMUSG00000036560,10	Lgi4	protein_coding	1.97879	0.00635962
ENSMUSG00000045826,8	Ptprcap	protein_coding	1.97658	0.010591
ENSMUSG00000001729,10	Akt1	protein_coding	1.97612	2.31312e-05
ENSMUSG00000063704,8	Mapk15	protein_coding	1.97387	5.84008e-05
ENSMUSG00000097652,2	Mhrt	antisense	1.96886	0.0218184
ENSMUSG00000019179,6	Mdh2	protein_coding	1.96775	0.00201047
ENSMUSG00000039713,12	Plekhg5	protein_coding	1.96489	0.000163385
ENSMUSG00000025145,9	Lrrc45	protein_coding	1.95753	5.2211e-05
ENSMUSG00000059562,10	Ccdc154	protein_coding	1.9534	0.000239827
ENSMUSG00000020282,14	Rhbdf1	protein_coding	1.95303	8.29043e-05
ENSMUSG00000036606,12	Plxnb2	protein_coding	1.95242	3.92883e-06
ENSMUSG00000031328,11	Flna	protein_coding	1.94909	4.25463e-05
ENSMUSG00000021203,11	Otub2	protein_coding	1.94833	0.00033474
ENSMUSG00000046556,6	Zfp319	protein_coding	1.94806	0.000192436
ENSMUSG00000031834,11	Pik3r2	protein_coding	1.94766	1.20351e-05
ENSMUSG00000064943,1	Gm23240	snRNA	1.94739	0.0150174
ENSMUSG00000002409,13	Dyrk1b	protein_coding	1.94373	0.00265719
ENSMUSG00000054008,8	Ndst1	protein_coding	1.94303	0.000171219
ENSMUSG00000084163,1	Gm11901	processed_pseudogene	1.94261	0.0239136
ENSMUSG00000089764,1	Gm16580	processed_pseudogene	1.94086	0.00252313
ENSMUSG00000097540,1	1700037F24Rik	lincRNA	1.93776	0.0230482
ENSMUSG00000011179,7	Odc1	protein_coding	1.93769	0.0140327
ENSMUSG00000006398,11	Cdc20	protein_coding	1.93742	0.00458956
ENSMUSG00000047649,8	Cd3eap	protein_coding	1.93619	0.00161416
ENSMUSG00000081344,5	Gm14303	processed_pseudogene	1.93241	0.024492
ENSMUSG00000035314,8	Gdpd5	protein_coding	1.9299	0.000646068
ENSMUSG00000099294,1	Gm11214	protein_coding	1.92931	0.010596
ENSMUSG00000029547,6	Ints1	protein_coding	1.92904	2.30604e-06
ENSMUSG00000028937,10	Acot7	protein_coding	1.92679	0.00031933
ENSMUSG00000023947,7	Nfkbie	protein_coding	1.92645	0.000269882
ENSMUSG00000083326,4	Rpl38-ps1	processed_pseudogene	1.92353	0.0302826
ENSMUSG00000047182,5	Irs3	protein_coding	1.91692	0.00302926
ENSMUSG00000027313,3	Chac1	protein_coding	1.91474	0.0104912
ENSMUSG00000035215,8	Lsm7	protein_coding	1.91174	0.0184707
ENSMUSG00000021265,3	Slc25a29	protein_coding	1.91162	0.00769215
ENSMUSG00000034117,3	Ptgdr2	protein_coding	1.91006	0.00141628
ENSMUSG00000098343,1	Mir6240	miRNA	1.90889	0.0277021
ENSMUSG00000041679,8	Lrrc29	protein_coding	1.90707	0.00984799
ENSMUSG00000020743,11	Mif4gd	protein_coding	1.90654	0.00549362
ENSMUSG00000098181,1	Rps12l2	processed_pseudogene	1.90591	0.0198008
ENSMUSG00000053654,7	Krt42	protein_coding	1.90514	0.00427623
ENSMUSG00000020372,11	Gnb2l1	protein_coding	1.90315	0.0161875
ENSMUSG00000070348,4	Ccnd1	protein_coding	1.903	0.0170146
ENSMUSG00000055707,8	Klhl26	protein_coding	1.90275	0.000267429
ENSMUSG00000060938,10	Rpl26	protein_coding	1.90227	0.017276
ENSMUSG00000057322,8	Rpl38	protein_coding	1.90106	0.0258322
ENSMUSG00000031217,8	Efnb1	protein_coding	1.90086	0.0190531
ENSMUSG00000025375,11	Aatk	protein_coding	1.90025	4.9509e-05
ENSMUSG00000095817,1	Gm3238	protein_coding	1.90004	0.0230249
ENSMUSG00000029436,8	Mmp17	protein_coding	1.89785	0.000147961
ENSMUSG00000061330,7	Gm11361	processed_pseudogene	1.89745	0.0194707
ENSMUSG00000092674,2	Gm24105	misc_RNA	1.89622	0.0249512
ENSMUSG00000046822,8	Slc39a3	protein_coding	1.89608	0.00118969
ENSMUSG00000002280,6	Narfl	protein_coding	1.89606	0.000464038
ENSMUSG00000044080,9	S100a1	protein_coding	1.89597	0.0256586
ENSMUSG00000024955,9	Esrra	protein_coding	1.89513	0.000315215
ENSMUSG00000053113,3	Socs3	protein_coding	1.89454	0.00501324
ENSMUSG00000041782,10	Lad1	protein_coding	1.89394	0.00485816
ENSMUSG00000049521,1	Cdc42ep1	protein_coding	1.89337	0.000166429
ENSMUSG00000006356,6	Crip2	protein_coding	1.89275	0.00321356
ENSMUSG00000075705,8	Msrb1	protein_coding	1.89265	0.022146
ENSMUSG00000076431,4	Sox4	protein_coding	1.8925	0.0146987
ENSMUSG00000007029,12	Vars	protein_coding	1.88971	0.00018903
ENSMUSG00000029049,10	Morn1	protein_coding	1.88936	0.00086488
ENSMUSG00000051627,2	Hist1h1e	protein_coding	1.88813	0.0215716
ENSMUSG00000022414,7	Tab1	protein_coding	1.88705	0.00110239
ENSMUSG00000031216,9	Stard8	protein_coding	1.88626	0.00124441
ENSMUSG00000082535,1	Gm7860	processed_pseudogene	1.88571	0.0267294
ENSMUSG00000031505,6	Carkd	protein_coding	1.88436	0.000651581
ENSMUSG00000025876,11	Unc5a	protein_coding	1.88246	0.00175477
ENSMUSG00000020307,10	Cdc34	protein_coding	1.88155	0.00274387
ENSMUSG00000037679,8	Inf2	protein_coding	1.88118	1.30427e-05
ENSMUSG00000022972,5	1110004E09Rik	protein_coding	1.88013	0.00848453
ENSMUSG00000097620,3	4921514A10Rik	antisense	1.87923	0.0259681
ENSMUSG00000052565,6	Hist1h1d	protein_coding	1.87704	0.0151087
ENSMUSG00000083496,1	Gm11263	processed_pseudogene	1.87529	0.0224849
ENSMUSG00000052146,11	Rps10	protein_coding	1.87395	0.0069971
ENSMUSG00000020483,10	Dynll2	protein_coding	1.87345	0.000177662
ENSMUSG00000025127,11	Gcgr	protein_coding	1.87224	0.00769215
ENSMUSG00000021290,5	2010107E04Rik	protein_coding	1.86741	0.00914168
ENSMUSG00000061032,8	Rrp1	protein_coding	1.86679	0.000352953
ENSMUSG00000044496,6	2510039O18Rik	protein_coding	1.86268	0.00115864
ENSMUSG00000025329,3	Padi1	protein_coding	1.86206	0.00174205
ENSMUSG00000023944,10	Hsp90ab1	protein_coding	1.86103	0.000157838
ENSMUSG00000014837,10	4931428F04Rik	protein_coding	1.86003	0.00275859
ENSMUSG00000067274,6	Rplp0	protein_coding	1.85891	0.0231595
ENSMUSG00000018974,3	Sart3	protein_coding	1.85828	1.37715e-05
ENSMUSG00000042978,9	Sbk1	protein_coding	1.85827	0.000945578
ENSMUSG00000005503,8	Evx1	protein_coding	1.85586	0.00427451
ENSMUSG00000029528,13	Pxn	protein_coding	1.85451	2.49908e-05
ENSMUSG00000082475,1	Gm7206	processed_pseudogene	1.85401	0.0220482
ENSMUSG00000061482,6	Hist1h4d	protein_coding	1.85288	0.0329593
ENSMUSG00000083705,2	Gm8624	transcribed_processed_pseudogene	1.85225	0.0223929
ENSMUSG00000003072,11	Atp5d	protein_coding	1.85161	0.00170201
ENSMUSG00000026520,8	Pycr2	protein_coding	1.85116	0.00146699
ENSMUSG00000015837,11	Sqstm1	protein_coding	1.85092	0.000501659
ENSMUSG00000021287,8	Xrcc3	protein_coding	1.84856	0.0051685
ENSMUSG00000066058,7	Cldn19	protein_coding	1.84803	0.000542265
ENSMUSG00000002799,5	Jag2	protein_coding	1.84466	0.00039188
ENSMUSG00000046070,8	Igfals	protein_coding	1.84328	0.0124087
ENSMUSG00000030800,9	Prss8	protein_coding	1.83991	0.0103464
ENSMUSG00000022382,10	Wnt7b	protein_coding	1.83806	0.000685541
ENSMUSG00000035773,5	Kiss1r	protein_coding	1.83798	0.00207609
ENSMUSG00000036957,7	Lrfn3	protein_coding	1.83669	0.0092538
ENSMUSG00000017817,7	Jph2	protein_coding	1.83626	0.00319643
ENSMUSG00000080268,3	Brms1	protein_coding	1.83546	0.00114537
ENSMUSG00000098178,1	Yam1	lincRNA	1.83449	0.00768495
ENSMUSG00000031972,4	Acta1	protein_coding	1.83286	0.00235335
ENSMUSG00000055926,2	Gm14137	protein_coding	1.83151	0.0144589
ENSMUSG00000025732,5	Fam195a	protein_coding	1.83138	0.0292575
ENSMUSG00000052922,5	Bpi	protein_coding	1.82932	0.00335588
ENSMUSG00000028416,7	Bag1	protein_coding	1.82857	0.00540375
ENSMUSG00000009097,9	Tbx1	protein_coding	1.82786	0.033902
ENSMUSG00000058709,7	Egln2	protein_coding	1.8278	0.00534935
ENSMUSG00000074252,2	Gm10654	protein_coding	1.8274	0.0052268
ENSMUSG00000025644,10	Gm7628	protein_coding	1.82381	0.0186644
ENSMUSG00000042377,8	Fam83g	protein_coding	1.82328	1.08687e-05
ENSMUSG00000039577,13	Nphp4	protein_coding	1.82315	2.86808e-05
ENSMUSG00000035863,9	Palm	protein_coding	1.82179	0.00212511
ENSMUSG00000003429,10	Rps11	protein_coding	1.82053	0.0299048
ENSMUSG00000040752,11	Myh6	protein_coding	1.82013	5.73583e-06
ENSMUSG00000095593,1	Gm7138	protein_coding	1.81834	0.0120127
ENSMUSG00000033862,6	Cdk10	protein_coding	1.8183	0.000716113
ENSMUSG00000025875,10	Tspan17	protein_coding	1.81722	0.0146312
ENSMUSG00000024213,9	Nudt3	protein_coding	1.81665	0.000485235
ENSMUSG00000103012,1	CH25-367I5,1	TEC	1.81656	0.00692217
ENSMUSG00000097424,2	1700030M09Rik	lincRNA	1.81608	0.00348074
ENSMUSG00000024193,7	Phf1	protein_coding	1.81591	0.00286606
ENSMUSG00000029811,10	Aoc1	protein_coding	1.81577	0.00684003
ENSMUSG00000028763,13	Hspg2	protein_coding	1.81402	2.08406e-07
ENSMUSG00000103166,1	RP23-18J18,3	TEC	1.81325	0.0246281
ENSMUSG00000032232,10	Cgnl1	protein_coding	1.81112	0.000258241
ENSMUSG00000022951,11	Rcan1	protein_coding	1.81107	0.00674813
ENSMUSG00000062028,7	Irgc1	protein_coding	1.80979	0.0233229
ENSMUSG00000040690,11	Col16a1	protein_coding	1.80969	5.73583e-06
ENSMUSG00000053647,4	Gper1	protein_coding	1.80946	0.000545223
ENSMUSG00000020238,10	Ncln	protein_coding	1.80904	0.00161416
ENSMUSG00000092680,1	Snord55	snoRNA	1.80877	0.0392503
ENSMUSG00000099291,1	Rnu3b3	snoRNA	1.80859	0.0213103
ENSMUSG00000085713,1	Gm15736	lincRNA	1.8085	0.00240075
ENSMUSG00000024181,8	Mrpl28	protein_coding	1.80743	0.0145989
ENSMUSG00000094178,1	n-R5s118	rRNA	1.80692	0.0253366
ENSMUSG00000047197,1	Gjd3	protein_coding	1.80606	0.0208779
ENSMUSG00000036578,6	Fxyd7	protein_coding	1.80495	0.0259569
ENSMUSG00000025158,7	Rfng	protein_coding	1.80357	0.00874295
ENSMUSG00000037553,10	Zdhhc18	protein_coding	1.803	0.00211304
ENSMUSG00000034902,13	Pip5k1c	protein_coding	1.80191	7.28284e-06
ENSMUSG00000072494,7	Ppp1r3e	protein_coding	1.80057	0.0235364
ENSMUSG00000042328,9	Hps4	protein_coding	1.80018	0.0010131
ENSMUSG00000054520,11	Sh3bp2	protein_coding	1.80009	0.000214093
ENSMUSG00000006360,7	Crip1	protein_coding	1.79917	0.0235531
ENSMUSG00000028635,7	Edn2	protein_coding	1.79781	0.0168471
ENSMUSG00000051343,9	Rab11fip5	protein_coding	1.7961	0.0018886
ENSMUSG00000055681,10	Cope	protein_coding	1.79581	0.000630118
ENSMUSG00000029599,10	Ddx54	protein_coding	1.79537	0.000264741
ENSMUSG00000048442,11	Smim5	protein_coding	1.79245	0.0154109
ENSMUSG00000003814,8	Calr	protein_coding	1.79243	0.00647312
ENSMUSG00000022090,6	Pdlim2	protein_coding	1.79184	0.00634285
ENSMUSG00000081094,3	Rpl19-ps11	processed_pseudogene	1.79024	0.0219587
ENSMUSG00000044469,7	Tnfaip8l1	protein_coding	1.78935	0.0150227
ENSMUSG00000030744,8	Rps3	protein_coding	1.78891	0.0228694
ENSMUSG00000072940,5	Gm10443	processed_pseudogene	1.78783	0.0342866
ENSMUSG00000096573,2	1700009J07Rik	protein_coding	1.78517	0.0169865
ENSMUSG00000020216,9	Jsrp1	protein_coding	1.78373	0.00799529
ENSMUSG00000031449,9	Atp4b	protein_coding	1.78232	0.0064574
ENSMUSG00000015467,10	Egfl8	protein_coding	1.78197	0.0131035
ENSMUSG00000026958,9	Dpp7	protein_coding	1.78197	0.011173
ENSMUSG00000090841,1	Myl6	protein_coding	1.78141	0.0157073
ENSMUSG00000057657,3	Rps18-ps3	protein_coding	1.78101	0.046494
ENSMUSG00000030409,11	Dmpk	protein_coding	1.78098	0.000543377
ENSMUSG00000104002,1	RP23-348C6,3	TEC	1.78043	0.019072
ENSMUSG00000065701,1	Rny1	misc_RNA	1.77947	0.0331186
ENSMUSG00000095970,1	Gm19402	protein_coding	1.77757	0.0317185
ENSMUSG00000064147,6	Rab44	protein_coding	1.7766	0.000999284
ENSMUSG00000004266,11	Ptpn6	protein_coding	1.7751	0.00402494
ENSMUSG00000050276,6	Mrgprg	protein_coding	1.77123	0.0252392
ENSMUSG00000095115,1	Itpripl2	protein_coding	1.76861	0.0122441
ENSMUSG00000027580,13	Helz2	protein_coding	1.76788	1.30427e-05
ENSMUSG00000032300,6	1700017B05Rik	protein_coding	1.7672	0.00308592
ENSMUSG00000066196,7	Spag8	protein_coding	1.76558	0.0262429
ENSMUSG00000031708,11	Tecr	protein_coding	1.76534	0.00768495
ENSMUSG00000025508,9	Rplp2	protein_coding	1.76481	0.0389669
ENSMUSG00000024858,9	Adrbk1	protein_coding	1.76472	8.20788e-06
ENSMUSG00000028661,8	Epha8	protein_coding	1.76438	0.0012369
ENSMUSG00000033039,9	Micall1	protein_coding	1.7637	2.64159e-05
ENSMUSG00000044857,7	Lemd2	protein_coding	1.76268	0.00498551
ENSMUSG00000071192,5	Wfikkn1	protein_coding	1.76166	0.0266641
ENSMUSG00000024807,13	Syvn1	protein_coding	1.76163	0.000185325
ENSMUSG00000029594,9	Rbm19	protein_coding	1.76133	0.000241161
ENSMUSG00000039183,5	Nubp2	protein_coding	1.76106	0.0173849
ENSMUSG00000062647,12	Rpl7a	protein_coding	1.76065	0.0220328
ENSMUSG00000033770,9	Clcnka	protein_coding	1.76032	0.00156849
ENSMUSG00000103906,1	TIGD5	protein_coding	1.75967	0.0175591
ENSMUSG00000004655,5	Aqp1	protein_coding	1.75929	0.0199389
ENSMUSG00000028950,2	Tas1r1	protein_coding	1.75875	0.00243867
ENSMUSG00000024731,11	Ms4a10	protein_coding	1.75771	0.00504659
ENSMUSG00000035621,9	Midn	protein_coding	1.75699	0.00043941
ENSMUSG00000044092,8	C130050O18Rik	protein_coding	1.75518	0.0010824
ENSMUSG00000025362,5	Rps26	protein_coding	1.75404	0.0249512
ENSMUSG00000036596,5	Cpz	protein_coding	1.75187	0.0012731
ENSMUSG00000053137,6	Mapk11	protein_coding	1.75172	0.00703707
ENSMUSG00000056204,7	Pgpep1	protein_coding	1.75072	0.000885958
ENSMUSG00000023995,7	Tspo2	protein_coding	1.74901	0.00146699
ENSMUSG00000044055,5	Otos	protein_coding	1.74896	0.00444677
ENSMUSG00000037992,12	Rara	protein_coding	1.74862	0.00084732
ENSMUSG00000064999,1	Gm26035	misc_RNA	1.74849	0.033829
ENSMUSG00000023009,10	Nckap5l	protein_coding	1.74716	0.00430101
ENSMUSG00000030084,7	Plxna1	protein_coding	1.74592	6.08654e-05
ENSMUSG00000055210,4	Foxd2	protein_coding	1.74478	0.0230923
ENSMUSG00000059033,7	Rpl18a-ps1	processed_pseudogene	1.74344	0.0324485
ENSMUSG00000088088,1	Rmrp	misc_RNA	1.74319	0.0105641
ENSMUSG00000038224,8	Serpinf2	protein_coding	1.74276	0.00129061
ENSMUSG00000081524,3	Gm11658	processed_pseudogene	1.7416	0.0342168
ENSMUSG00000065037,1	Rn7sk	misc_RNA	1.74121	0.0170125
ENSMUSG00000008734,8	Gprc5b	protein_coding	1.73907	0.00157499
ENSMUSG00000024856,6	Cdk2ap2	protein_coding	1.73585	0.00148145
ENSMUSG00000070319,5	Eif3g	protein_coding	1.73467	0.0012387
ENSMUSG00000028073,11	Pear1	protein_coding	1.732	6.71851e-05
ENSMUSG00000020684,10	Rasl10b	protein_coding	1.73188	0.00143702
ENSMUSG00000030842,7	Lamtor1	protein_coding	1.73161	0.0132866
ENSMUSG00000041841,7	Rpl37	protein_coding	1.72987	0.0251311
ENSMUSG00000043733,10	Ptpn11	protein_coding	1.72816	0.000269323
ENSMUSG00000039452,5	Snx22	protein_coding	1.72711	0.0123963
ENSMUSG00000058743,5	Kcnj14	protein_coding	1.7254	0.00602884
ENSMUSG00000087687,2	Pet100	protein_coding	1.72487	0.0134292
ENSMUSG00000028940,2	Hes2	protein_coding	1.72437	0.0126179
ENSMUSG00000024173,10	Tpsab1	protein_coding	1.72222	0.0151611
ENSMUSG00000045912,8	C2cd4c	protein_coding	1.72081	0.000400402
ENSMUSG00000038976,8	Ppp1r9b	protein_coding	1.71889	2.64159e-05
ENSMUSG00000078532,5	Nkain1	protein_coding	1.71865	0.00315082
ENSMUSG00000000489,6	Pdgfb	protein_coding	1.71771	0.0027695
ENSMUSG00000055862,6	Izumo4	protein_coding	1.71459	0.0244237
ENSMUSG00000059995,8	Atxn7l3	protein_coding	1.71345	0.000661714
ENSMUSG00000002963,12	Pnkp	protein_coding	1.71344	0.00178455
ENSMUSG00000006676,12	Usp19	protein_coding	1.71343	5.84008e-05
ENSMUSG00000022443,12	Myh9	protein_coding	1.71268	7.28284e-06
ENSMUSG00000070225,1	n-R5s33	rRNA	1.71194	0.0297158
ENSMUSG00000039483,6	Asb6	protein_coding	1.71148	0.00021416
ENSMUSG00000078429,4	Ctdsp2	protein_coding	1.71143	0.000744357
ENSMUSG00000042675,11	Ypel3	protein_coding	1.7099	0.0151511
ENSMUSG00000043085,10	Tmem82	protein_coding	1.70879	0.00448495
ENSMUSG00000056724,10	Nbeal2	protein_coding	1.70806	6.57472e-06
ENSMUSG00000034837,8	Gnat1	protein_coding	1.7079	0.00529257
ENSMUSG00000002871,10	Tpra1	protein_coding	1.7079	0.0027695
ENSMUSG00000080810,1	Gm11737	processed_pseudogene	1.70789	0.0397806
ENSMUSG00000017344,4	Vtn	protein_coding	1.70778	0.0126378
ENSMUSG00000062154,9	Tex33	protein_coding	1.70755	0.014788
ENSMUSG00000046182,7	Gsg1l	protein_coding	1.70744	0.00063316
ENSMUSG00000065691,1	n-R5s77	rRNA	1.70705	0.0483572
ENSMUSG00000026308,8	Klhl30	protein_coding	1.70495	0.00125431
ENSMUSG00000042279,9	H1foo	protein_coding	1.70474	0.0297727
ENSMUSG00000015461,11	Atf6b	protein_coding	1.70404	0.000134152
ENSMUSG00000042535,8	Gtpbp1	protein_coding	1.70365	0.000716357
ENSMUSG00000095580,1	Rnu1b1	snRNA	1.70317	0.0191734
ENSMUSG00000056228,9	Cars2	protein_coding	1.70307	0.00205045
ENSMUSG00000081210,1	Gm12933	processed_pseudogene	1.70007	0.0293632
ENSMUSG00000029538,9	Srsf9	protein_coding	1.69952	0.0196065
ENSMUSG00000019278,4	Dpep1	protein_coding	1.69939	0.00397729
ENSMUSG00000007216,4	Zfp775	protein_coding	1.69876	0.00692217
ENSMUSG00000038900,13	Rpl12	protein_coding	1.69841	0.0421609
ENSMUSG00000014303,9	Glis2	protein_coding	1.69772	0.000517716
ENSMUSG00000003352,9	Cacnb3	protein_coding	1.69748	0.000315215
ENSMUSG00000059195,10	Gm12715	processed_pseudogene	1.69735	0.027437
ENSMUSG00000041203,8	2310036O22Rik	protein_coding	1.69668	0.00163517
ENSMUSG00000092383,1	H2-Pb	processed_pseudogene	1.69643	0.0363444
ENSMUSG00000006587,5	Snai3	protein_coding	1.69641	0.0223788
ENSMUSG00000101355,1	Hist1h3h	protein_coding	1.69574	0.0428262
ENSMUSG00000097062,1	Gm17586	lincRNA	1.6957	0.0180473
ENSMUSG00000051107,4	Gm15440	protein_coding	1.69553	0.0253852
ENSMUSG00000040945,9	Rcc2	protein_coding	1.6955	0.0003992
ENSMUSG00000044927,6	H1fx	protein_coding	1.69544	0.0430946
ENSMUSG00000043858,13	Nup62	protein_coding	1.69322	0.00740013
ENSMUSG00000006307,12	Kmt2b	protein_coding	1.69087	1.61537e-05
ENSMUSG00000032381,5	Fam96a	protein_coding	1.69064	0.0305182
ENSMUSG00000037813,9	D630003M21Rik	protein_coding	1.68963	0.000519089
ENSMUSG00000041199,2	Rpusd1	protein_coding	1.68924	0.0152627
ENSMUSG00000006218,4	Fam131c	protein_coding	1.68828	0.0374034
ENSMUSG00000092586,4	Ly6g6c	protein_coding	1.68806	0.0205888
ENSMUSG00000070002,6	Ell	protein_coding	1.68647	0.00140651
ENSMUSG00000078735,3	Il11ra2	protein_coding	1.68528	0.0410927
ENSMUSG00000031778,8	Cx3cl1	protein_coding	1.68498	0.00924914
ENSMUSG00000048483,5	Zdhhc22	protein_coding	1.68436	0.00543154
ENSMUSG00000040525,9	Cblc	protein_coding	1.68327	0.0135733
ENSMUSG00000084284,1	Tpt1-ps6	processed_pseudogene	1.68096	0.0203307
ENSMUSG00000066900,7	Suds3	protein_coding	1.68022	0.00140651
ENSMUSG00000051510,9	Mafg	protein_coding	1.68	0.000167776
ENSMUSG00000032383,6	Ppib	protein_coding	1.67982	0.0325719
ENSMUSG00000081302,1	Gm12020	processed_pseudogene	1.67971	0.0372203
ENSMUSG00000002602,12	Axl	protein_coding	1.67968	0.00015974
ENSMUSG00000041936,14	Agrn	protein_coding	1.67962	0.000129463
ENSMUSG00000022982,9	Sod1	protein_coding	1.67945	0.0416657
ENSMUSG00000104222,1	RP23-349K15,2	TEC	1.67804	0.0196597
ENSMUSG00000045174,10	Amer3	protein_coding	1.67759	0.0124826
ENSMUSG00000100241,1	Slc18a3	protein_coding	1.67752	0.0187964
ENSMUSG00000035027,13	Map2k2	protein_coding	1.67709	0.000161847
ENSMUSG00000077588,1	Gm24372	misc_RNA	1.67692	0.0325187
ENSMUSG00000036587,9	Fut7	protein_coding	1.67667	0.0495871
ENSMUSG00000083646,1	Gm6088	processed_pseudogene	1.67633	0.0253366
ENSMUSG00000031809,6	1700018B08Rik	protein_coding	1.67602	0.00510086
ENSMUSG00000022550,13	Adck5	protein_coding	1.67535	0.00528776
ENSMUSG00000030873,8	Scnn1b	protein_coding	1.6752	0.00322199
ENSMUSG00000053046,10	Brsk2	protein_coding	1.67482	0.000129463
ENSMUSG00000055762,11	Eef1d	protein_coding	1.67348	0.000518478
ENSMUSG00000048997,13	Atxn7l2	protein_coding	1.67292	0.00116853
ENSMUSG00000029119,5	Man2b2	protein_coding	1.67215	0.000416574
ENSMUSG00000031074,10	Fgf3	protein_coding	1.67116	0.0199014
ENSMUSG00000023345,11	Poc1a	protein_coding	1.67033	0.000443869
ENSMUSG00000028851,6	Nudc	protein_coding	1.66924	0.0101396
ENSMUSG00000035673,9	Sbno2	protein_coding	1.66893	0.000186413
ENSMUSG00000024937,10	Ehbp1l1	protein_coding	1.66883	1.77312e-05
ENSMUSG00000029591,10	Ung	protein_coding	1.6687	0.006479
ENSMUSG00000035671,5	Zswim4	protein_coding	1.66829	0.000417394
ENSMUSG00000095567,3	Noc2l	protein_coding	1.66779	0.00218601
ENSMUSG00000047417,13	Rexo1	protein_coding	1.66738	0.00012695
ENSMUSG00000012777,10	Acpt	protein_coding	1.66658	0.0424115
ENSMUSG00000078439,5	Smim24	protein_coding	1.66441	0.0133688
ENSMUSG00000073434,7	Wdr90	protein_coding	1.66398	1.4095e-05
ENSMUSG00000001034,13	Mapk7	protein_coding	1.66368	0.00333893
ENSMUSG00000023084,7	Lrrc71	protein_coding	1.66163	0.00351173
ENSMUSG00000096257,1	Gm6537	protein_coding	1.66122	0.00965653
ENSMUSG00000004231,11	Pax2	protein_coding	1.66089	1.65873e-05
ENSMUSG00000050138,7	Kcnk12	protein_coding	1.66043	0.0145525
ENSMUSG00000002249,13	Tead3	protein_coding	1.66013	0.00820934
ENSMUSG00000031818,8	Cox4i1	protein_coding	1.66002	0.025293
ENSMUSG00000014444,12	Piezo1	protein_coding	1.65945	5.73583e-06
ENSMUSG00000026603,9	Smyd2	protein_coding	1.65907	0.00187725
ENSMUSG00000026201,8	Stk16	protein_coding	1.65899	0.00378077
ENSMUSG00000040731,10	Eif4h	protein_coding	1.65859	0.00267982
ENSMUSG00000022561,8	Gpaa1	protein_coding	1.65687	0.0166398
ENSMUSG00000037503,8	Fam168b	protein_coding	1.6568	0.0210816
ENSMUSG00000032744,4	Heyl	protein_coding	1.65663	0.0069971
ENSMUSG00000026853,11	Crat	protein_coding	1.65658	0.00115864
ENSMUSG00000038034,11	Igsf8	protein_coding	1.65564	0.00146699
ENSMUSG00000034427,12	Myo15b	protein_coding	1.65448	8.20788e-06
ENSMUSG00000068745,5	Mybphl	protein_coding	1.65287	0.00914168
ENSMUSG00000008348,9	Ubc	protein_coding	1.6524	0.00710423
ENSMUSG00000019235,8	Rps6kl1	protein_coding	1.65209	0.0140327
ENSMUSG00000018339,7	Gpx3	protein_coding	1.65198	0.0252392
ENSMUSG00000005716,12	Pvalb	protein_coding	1.65192	0.0325369
ENSMUSG00000023973,9	Cnpy3	protein_coding	1.65171	0.00968125
ENSMUSG00000023007,11	Prpf40b	protein_coding	1.65116	0.000112326
ENSMUSG00000035711,4	Dok3	protein_coding	1.65079	0.0441731
ENSMUSG00000041740,12	Rnf10	protein_coding	1.64904	0.000239827
ENSMUSG00000035828,10	Pim3	protein_coding	1.64898	0.0164692
ENSMUSG00000066512,2	Klk1b5	protein_coding	1.64897	0.0429266
ENSMUSG00000103108,1	RP23-1D15,3	TEC	1.64485	0.0116821
ENSMUSG00000034739,13	Mfrp	protein_coding	1.64346	0.010711
ENSMUSG00000023909,3	Paqr4	protein_coding	1.6432	0.00496747
ENSMUSG00000034993,7	Vat1	protein_coding	1.64227	0.00582969
ENSMUSG00000040263,12	Klhdc4	protein_coding	1.64173	1.65873e-05
ENSMUSG00000039813,10	Tbc1d2	protein_coding	1.64101	0.00275611
ENSMUSG00000021194,5	Chga	protein_coding	1.64093	0.00144187
ENSMUSG00000019254,12	Ppp1r12c	protein_coding	1.64053	0.000402207
ENSMUSG00000062753,9	AI413582	protein_coding	1.64021	0.0244802
ENSMUSG00000028949,9	Smarcd3	protein_coding	1.63956	0.00531458
ENSMUSG00000029640,13	Usp12	protein_coding	1.63925	0.000846197
ENSMUSG00000009075,2	Cabp7	protein_coding	1.6392	0.0132853
ENSMUSG00000031510,5	1700128E19Rik	lincRNA	1.63917	0.00353249
ENSMUSG00000034974,8	Dapk3	protein_coding	1.63913	0.0220328
ENSMUSG00000038695,8	Josd2	protein_coding	1.63825	0.0167348
ENSMUSG00000019590,12	Cyb561	protein_coding	1.63748	0.000241161
ENSMUSG00000082064,3	Rpl5-ps2	processed_pseudogene	1.63738	0.0439864
ENSMUSG00000020091,10	Eif4ebp2	protein_coding	1.63541	0.00520714
ENSMUSG00000101126,1	Gm10538	antisense	1.63484	0.0396686
ENSMUSG00000002393,10	Nr2f6	protein_coding	1.63304	0.0264762
ENSMUSG00000063065,9	Mapk3	protein_coding	1.63271	0.00411603
ENSMUSG00000059625,6	Sohlh1	protein_coding	1.63205	0.0357642
ENSMUSG00000025161,12	Slc16a3	protein_coding	1.6319	0.0021714
ENSMUSG00000030340,12	Scnn1a	protein_coding	1.63156	8.29043e-05
ENSMUSG00000043099,4	Hic1	protein_coding	1.63084	0.00433362
ENSMUSG00000035342,9	Lzts2	protein_coding	1.62862	0.000516547
ENSMUSG00000024772,9	Ehd1	protein_coding	1.62797	0.000576323
ENSMUSG00000029096,11	Htra3	protein_coding	1.62721	0.00174962
ENSMUSG00000003068,11	Stk11	protein_coding	1.6271	0.00146876
ENSMUSG00000035429,9	Ptprh	protein_coding	1.62592	0.00645172
ENSMUSG00000038545,9	Cul7	protein_coding	1.62493	6.76381e-06
ENSMUSG00000042292,12	Mkl1	protein_coding	1.62485	0.00155133
ENSMUSG00000026304,9	Rab17	protein_coding	1.62362	0.00861622
ENSMUSG00000029577,9	Ube3b	protein_coding	1.62143	4.2263e-05
ENSMUSG00000006333,10	Rps9	protein_coding	1.62138	0.0360986
ENSMUSG00000034930,11	Rtkn	protein_coding	1.6205	0.0190903
ENSMUSG00000060126,10	Tpt1	protein_coding	1.6205	0.0496957
ENSMUSG00000042269,11	Fam92b	protein_coding	1.61982	0.00606891
ENSMUSG00000020773,7	Trim47	protein_coding	1.6192	0.0325187
ENSMUSG00000025278,8	Flnb	protein_coding	1.61883	0.000789467
ENSMUSG00000023175,11	Bsg	protein_coding	1.61882	0.00496747
ENSMUSG00000068227,4	Il2rb	protein_coding	1.61769	0.00219802
ENSMUSG00000041354,11	Rgl2	protein_coding	1.61767	0.000456804
ENSMUSG00000049517,7	Rps23	protein_coding	1.61763	0.0460019
ENSMUSG00000035561,5	Aldh1b1	protein_coding	1.61736	0.0390174
ENSMUSG00000022475,14	Hdac7	protein_coding	1.61602	0.000239827
ENSMUSG00000042622,9	Maff	protein_coding	1.61582	0.0163272
ENSMUSG00000001507,12	Itga3	protein_coding	1.61577	0.000154138
ENSMUSG00000018169,8	Mfng	protein_coding	1.61552	0.00187392
ENSMUSG00000040463,12	Mybbp1a	protein_coding	1.61536	4.82238e-05
ENSMUSG00000032733,5	Snx33	protein_coding	1.61356	0.00250667
ENSMUSG00000026796,12	Fam129b	protein_coding	1.61043	0.000657686
ENSMUSG00000018983,9	E2f2	protein_coding	1.60962	0.00207609
ENSMUSG00000034762,5	Glis1	protein_coding	1.60928	0.00373906
ENSMUSG00000030898,10	Cckbr	protein_coding	1.60738	0.0126227
ENSMUSG00000020847,11	Rph3al	protein_coding	1.60693	0.00122111
ENSMUSG00000048920,7	Fkrp	protein_coding	1.60664	0.0124087
ENSMUSG00000033216,7	Eefsec	protein_coding	1.60644	0.0132866
ENSMUSG00000052397,8	Ezr	protein_coding	1.60611	0.000498721
ENSMUSG00000025377,10	Enthd2	protein_coding	1.60586	0.00338158
ENSMUSG00000032593,5	Amigo3	protein_coding	1.6035	0.0152398
ENSMUSG00000094504,1	Gm5294	protein_coding	1.60333	0.0436882
ENSMUSG00000095098,1	Ccdc85b	protein_coding	1.6029	0.0203828
ENSMUSG00000069227,4	Gprin1	protein_coding	1.60132	0.00626913
ENSMUSG00000071073,4	Lrrc73	protein_coding	1.60016	0.0148956
ENSMUSG00000064326,8	Siva1	protein_coding	1.60006	0.0339551
ENSMUSG00000037966,11	Ninj1	protein_coding	1.59972	0.0329315
ENSMUSG00000066235,6	Pomgnt2	protein_coding	1.59892	0.0265677
ENSMUSG00000070331,9	Qrich2	protein_coding	1.59842	0.00808322
ENSMUSG00000039263,12	Npepl1	protein_coding	1.59765	0.00135976
ENSMUSG00000086241,2	4930483K19Rik	antisense	1.59661	0.040329
ENSMUSG00000019370,10	Calm3	protein_coding	1.59582	0.0334135
ENSMUSG00000001750,11	Tcirg1	protein_coding	1.59542	0.000705057
ENSMUSG00000069581,7	Tspear	protein_coding	1.59495	0.00389162
ENSMUSG00000041351,12	Rap1gap	protein_coding	1.59387	0.000464577
ENSMUSG00000038199,8	4931409K22Rik	protein_coding	1.59225	0.000518478
ENSMUSG00000019433,8	Gipc1	protein_coding	1.59196	0.0170146
ENSMUSG00000004187,10	Kifc2	protein_coding	1.59064	0.00272363
ENSMUSG00000025730,10	Rab40c	protein_coding	1.58961	0.00160513
ENSMUSG00000028367,5	Txn1	protein_coding	1.58883	0.0198008
ENSMUSG00000036856,4	Wnt4	protein_coding	1.58821	0.0346268
ENSMUSG00000024137,8	E4f1	protein_coding	1.58812	0.00882584
ENSMUSG00000038319,10	Kcnh2	protein_coding	1.58739	0.00126806
ENSMUSG00000050445,4	Cyp8b1	protein_coding	1.58715	0.0141078
ENSMUSG00000006731,9	B4galnt1	protein_coding	1.5871	0.0090186
ENSMUSG00000005514,10	Por	protein_coding	1.58681	0.00031933
ENSMUSG00000067873,7	Htatsf1	protein_coding	1.58614	0.026734
ENSMUSG00000075585,3	6330403L08Rik	lincRNA	1.58579	0.00118306
ENSMUSG00000035835,10	Lppr3	protein_coding	1.58518	0.00239944
ENSMUSG00000033763,10	Mtss1l	protein_coding	1.58457	6.45292e-05
ENSMUSG00000078440,5	Dohh	protein_coding	1.58432	0.00250651
ENSMUSG00000090174,1	Gm10612	antisense	1.58407	0.0202861
ENSMUSG00000059734,6	Ndufs8	protein_coding	1.58315	0.00580303
ENSMUSG00000082792,1	Gm12176	processed_pseudogene	1.58143	0.0437294
ENSMUSG00000052609,8	Plekhg3	protein_coding	1.581	0.00170201
ENSMUSG00000099492,1	Gm5525	processed_pseudogene	1.58078	0.0474732
ENSMUSG00000075918,1	n-R5s2	rRNA	1.58067	0.0494849
ENSMUSG00000039615,8	Stub1	protein_coding	1.57993	0.0233692
ENSMUSG00000054662,7	Ano9	protein_coding	1.57982	0.00328133
ENSMUSG00000047843,12	Bri3	protein_coding	1.57919	0.0360399
ENSMUSG00000004929,8	Thop1	protein_coding	1.57864	0.000701523
ENSMUSG00000004933,13	Matk	protein_coding	1.5782	0.00373473
ENSMUSG00000060166,5	Zdhhc8	protein_coding	1.57792	0.00281701
ENSMUSG00000048013,9	Krt35	protein_coding	1.57746	0.0152856
ENSMUSG00000034994,9	Eef2	protein_coding	1.5771	0.00305195
ENSMUSG00000024792,4	Zfpl1	protein_coding	1.57647	0.01282
ENSMUSG00000027484,2	Bpifa5	protein_coding	1.57581	0.0148857
ENSMUSG00000020388,8	Pdlim4	protein_coding	1.57485	0.0039832
ENSMUSG00000044716,8	Dok7	protein_coding	1.57479	0.00528776
ENSMUSG00000024254,11	Abcg8	protein_coding	1.57466	0.00120097
ENSMUSG00000033128,8	Gga1	protein_coding	1.57392	7.11811e-05
ENSMUSG00000001911,12	Nfix	protein_coding	1.57311	0.000377219
ENSMUSG00000006019,11	Dhx34	protein_coding	1.57217	0.00241818
ENSMUSG00000039754,6	Alkbh4	protein_coding	1.57146	0.0113913
ENSMUSG00000038000,9	Acd	protein_coding	1.57141	0.00395683
ENSMUSG00000097097,1	5033426O07Rik	lincRNA	1.57044	0.0100767
ENSMUSG00000082476,1	Gm12242	processed_pseudogene	1.56876	0.0280505
ENSMUSG00000019320,9	Noxo1	protein_coding	1.56813	0.0261937
ENSMUSG00000076615,3	Ighg3	IG_C_gene	1.56763	0.0481696
ENSMUSG00000045128,8	Rpl18a	protein_coding	1.56663	0.0448652
ENSMUSG00000053293,7	Pom121	protein_coding	1.56571	0.000224234
ENSMUSG00000036805,9	Noxa1	protein_coding	1.56561	0.0141297
ENSMUSG00000029725,6	Ppp1r35	protein_coding	1.56543	0.0404001
ENSMUSG00000022436,11	Sh3bp1	protein_coding	1.56508	3.85833e-05
ENSMUSG00000036026,11	Tmem63b	protein_coding	1.56506	0.00144187
ENSMUSG00000039323,14	Igfbp2	protein_coding	1.56475	0.0346258
ENSMUSG00000051067,7	Lingo3	protein_coding	1.56411	0.0207484
ENSMUSG00000074227,7	Spint2	protein_coding	1.56397	0.0237349
ENSMUSG00000036915,12	Kirrel2	protein_coding	1.56356	0.0014072
ENSMUSG00000060279,9	Ap2a1	protein_coding	1.56314	0.00411826
ENSMUSG00000032511,13	Scn5a	protein_coding	1.56274	7.30475e-06
ENSMUSG00000025485,8	Ric8	protein_coding	1.56214	0.00531338
ENSMUSG00000019579,9	D17Wsu104e	protein_coding	1.5618	0.0129266
ENSMUSG00000013236,12	Ptprs	protein_coding	1.56129	7.26499e-05
ENSMUSG00000039976,3	Tbc1d16	protein_coding	1.56069	0.000875206
ENSMUSG00000003420,7	Fcgrt	protein_coding	1.55917	0.0105122
ENSMUSG00000037742,10	Eef1a1	protein_coding	1.55856	0.0366515
ENSMUSG00000021866,11	Anxa11	protein_coding	1.55777	0.0212832
ENSMUSG00000048826,6	Dact2	protein_coding	1.55743	0.00899504
ENSMUSG00000076433,4	BC100451	protein_coding	1.55551	0.0125168
ENSMUSG00000001029,11	Icam2	protein_coding	1.5549	0.0150668
ENSMUSG00000096906,1	Gm26506	miRNA	1.55382	0.0164442
ENSMUSG00000026237,3	Nmur1	protein_coding	1.55334	0.0119462
ENSMUSG00000052631,10	Sh2d6	protein_coding	1.55216	0.0165873
ENSMUSG00000042406,7	Atf4	protein_coding	1.55109	0.0115401
ENSMUSG00000042529,10	Kcnj12	protein_coding	1.5509	0.0206463
ENSMUSG00000026944,14	Abca2	protein_coding	1.55051	2.31312e-05
ENSMUSG00000027646,11	Src	protein_coding	1.54962	0.000355672
ENSMUSG00000040663,8	Clcf1	protein_coding	1.54875	6.18582e-05
ENSMUSG00000024847,10	Aip	protein_coding	1.54824	0.0157999
ENSMUSG00000000552,9	Zfp385a	protein_coding	1.54802	0.0210083
ENSMUSG00000029718,10	Pcolce	protein_coding	1.54766	0.018453
ENSMUSG00000048796,7	Cyb561d1	protein_coding	1.54619	0.0165512
ENSMUSG00000019312,6	Grb7	protein_coding	1.54429	0.00169423
ENSMUSG00000003099,7	Ppp5c	protein_coding	1.54429	0.0132835
ENSMUSG00000046408,9	1700067K01Rik	protein_coding	1.54412	0.0141466
ENSMUSG00000047730,13	Fcgbp	protein_coding	1.54379	0.000228338
ENSMUSG00000002820,5	Atg4d	protein_coding	1.54322	0.01137
ENSMUSG00000025185,10	Loxl4	protein_coding	1.54303	7.45923e-05
ENSMUSG00000031805,13	Jak3	protein_coding	1.54269	0.000233143
ENSMUSG00000037089,9	Slc35b2	protein_coding	1.54236	0.00583691
ENSMUSG00000054889,5	Dsp	protein_coding	1.54225	0.000464577
ENSMUSG00000056629,11	Fkbp2	protein_coding	1.54218	0.0169113
ENSMUSG00000047904,6	Sstr2	protein_coding	1.54213	0.0141913
ENSMUSG00000048677,8	Tpcn2	protein_coding	1.54197	0.00315082
ENSMUSG00000001119,7	Col6a1	protein_coding	1.54135	0.000246825
ENSMUSG00000057863,5	Rpl36	protein_coding	1.54135	0.0177182
ENSMUSG00000025511,10	Tspan4	protein_coding	1.54023	0.017336
ENSMUSG00000014602,11	Kif1a	protein_coding	1.53954	7.99432e-06
ENSMUSG00000034159,8	2310007B03Rik	protein_coding	1.53916	0.0119147
ENSMUSG00000031822,14	Gse1	protein_coding	1.53809	0.000213752
ENSMUSG00000019464,5	Ptger1	protein_coding	1.53794	0.00422738
ENSMUSG00000072214,6	Sept5	protein_coding	1.53779	0.0135247
ENSMUSG00000013076,11	Amotl1	protein_coding	1.53715	0.000419173
ENSMUSG00000028776,10	Tinagl1	protein_coding	1.5364	0.000683198
ENSMUSG00000062075,9	Lmnb2	protein_coding	1.53534	0.00263524
ENSMUSG00000028538,8	St3gal3	protein_coding	1.53524	0.00624981
ENSMUSG00000081797,1	Gm8662	processed_pseudogene	1.53466	0.0336865
ENSMUSG00000045322,10	Tlr9	protein_coding	1.53408	0.00729284
ENSMUSG00000025795,7	Rassf3	protein_coding	1.53404	0.00415621
ENSMUSG00000026475,7	Rgs16	protein_coding	1.53401	0.0185252
ENSMUSG00000051586,10	Mical3	protein_coding	1.53356	0.000241161
ENSMUSG00000026424,8	Gpr37l1	protein_coding	1.53343	0.0101757
ENSMUSG00000052629,5	Gm9885	lincRNA	1.53338	0.0378575
ENSMUSG00000027215,9	Cd82	protein_coding	1.53293	0.00808322
ENSMUSG00000043592,11	Unc5cl	protein_coding	1.53291	0.000398364
ENSMUSG00000016757,6	Ttll12	protein_coding	1.53235	0.0053206
ENSMUSG00000041556,8	Fbxo2	protein_coding	1.53204	0.0457525
ENSMUSG00000015016,7	Acsf3	protein_coding	1.53187	0.0067577
ENSMUSG00000039021,11	Ttc16	protein_coding	1.53095	0.000731556
ENSMUSG00000025153,8	Fasn	protein_coding	1.53089	0.00017844
ENSMUSG00000031766,3	Slc12a3	protein_coding	1.52942	0.000204439
ENSMUSG00000044933,2	Sstr3	protein_coding	1.52928	0.00543301
ENSMUSG00000041062,6	Mslnl	protein_coding	1.52896	0.00310587
ENSMUSG00000001289,8	Pfdn5	protein_coding	1.52733	0.0375148
ENSMUSG00000070604,3	Vsig10l	protein_coding	1.52697	0.00348074
ENSMUSG00000011837,3	Snapc2	protein_coding	1.52622	0.0302808
ENSMUSG00000025020,7	Slit1	protein_coding	1.52616	7.95089e-06
ENSMUSG00000006369,10	Fbln1	protein_coding	1.52613	0.00920815
ENSMUSG00000033365,10	Ipo13	protein_coding	1.52595	0.000657686
ENSMUSG00000042644,8	Itpr3	protein_coding	1.52588	7.28284e-06
ENSMUSG00000022840,8	Adcy5	protein_coding	1.52512	0.000518478
ENSMUSG00000044724,8	Gpr152	protein_coding	1.524	0.00197074
ENSMUSG00000094626,1	Cecr6	protein_coding	1.52389	0.0174752
ENSMUSG00000041420,14	Meis3	protein_coding	1.52291	0.0046343
ENSMUSG00000028973,14	Abcb8	protein_coding	1.52286	0.00116853
ENSMUSG00000048478,6	Spata33	protein_coding	1.52266	0.0326648
ENSMUSG00000028680,10	Plk3	protein_coding	1.52177	0.0151918
ENSMUSG00000063661,5	Krt73	protein_coding	1.52121	0.0204979
ENSMUSG00000045009,7	Prrt3	protein_coding	1.51956	0.0207627
ENSMUSG00000024737,2	Slc15a3	protein_coding	1.51917	8.29043e-05
ENSMUSG00000057342,9	Sphk2	protein_coding	1.51899	0.00619117
ENSMUSG00000047547,10	Cltb	protein_coding	1.51874	0.00228394
ENSMUSG00000024334,8	H2-Oa	protein_coding	1.5187	0.0206752
ENSMUSG00000002763,12	Pex6	protein_coding	1.51839	0.0295429
ENSMUSG00000040007,8	Bahd1	protein_coding	1.51831	0.00552462
ENSMUSG00000031832,10	Taf1c	protein_coding	1.5179	0.00378232
ENSMUSG00000097147,1	Gm26780	lincRNA	1.5177	0.0143685
ENSMUSG00000091845,1	Gm4604	processed_pseudogene	1.51697	0.041436
ENSMUSG00000001082,8	Mfsd10	protein_coding	1.5166	0.00537761
ENSMUSG00000020902,8	Ntn1	protein_coding	1.51579	0.00148826
ENSMUSG00000039518,7	Cdsn	protein_coding	1.5152	0.0413654
ENSMUSG00000015981,8	Stk32c	protein_coding	1.51476	0.0115713
ENSMUSG00000064254,6	Ethe1	protein_coding	1.51469	0.0222488
ENSMUSG00000032492,10	Pth1r	protein_coding	1.51465	0.0136184
ENSMUSG00000036564,12	Ndrg4	protein_coding	1.51452	0.000655299
ENSMUSG00000005442,9	Cic	protein_coding	1.51315	0.00014234
ENSMUSG00000072082,6	Ccnf	protein_coding	1.51297	0.00854098
ENSMUSG00000002496,9	Tsc2	protein_coding	1.51291	0.000269882
ENSMUSG00000036687,9	Tmem184a	protein_coding	1.51224	0.00763218
ENSMUSG00000031734,12	Irx3	protein_coding	1.51192	0.00415718
ENSMUSG00000072625,1	Gdf2	protein_coding	1.51181	0.0196609
ENSMUSG00000048371,7	Pdp2	protein_coding	1.51157	0.0230923
ENSMUSG00000009145,4	Dqx1	protein_coding	1.51112	0.00901204
ENSMUSG00000035206,9	Sppl2b	protein_coding	1.51069	0.00598171
ENSMUSG00000020439,13	Smtn	protein_coding	1.51046	0.00115864
ENSMUSG00000020792,11	Exoc7	protein_coding	1.51043	0.000131645
ENSMUSG00000034685,4	Fam171a2	protein_coding	1.50989	0.0139924
ENSMUSG00000021608,10	Lpcat1	protein_coding	1.50913	0.00161416
ENSMUSG00000054452,9	Aes	protein_coding	1.50908	0.00930261
ENSMUSG00000025422,8	Agap2	protein_coding	1.50893	0.00012695
ENSMUSG00000028952,8	Zbtb48	protein_coding	1.50878	0.0227366
ENSMUSG00000085246,1	Gm15893	antisense	1.5086	0.0372579
ENSMUSG00000020260,8	Pofut2	protein_coding	1.50839	0.0203287
ENSMUSG00000085823,3	Gm13012	antisense	1.50839	0.0258103
ENSMUSG00000031849,8	Comp	protein_coding	1.50836	0.00198879
ENSMUSG00000027162,7	Lin7c	protein_coding	1.50727	0.00446059
ENSMUSG00000038775,10	Vill	protein_coding	1.5055	0.000609098
ENSMUSG00000024134,11	Six2	protein_coding	1.50476	0.0241106
ENSMUSG00000025743,10	Sdc3	protein_coding	1.50439	0.00216427
ENSMUSG00000048310,8	Pskh1	protein_coding	1.50437	0.0120503
ENSMUSG00000041479,9	Syt15	protein_coding	1.50418	0.0126084
ENSMUSG00000071074,5	Yipf3	protein_coding	1.50268	0.00863933
ENSMUSG00000029028,10	Lrrc47	protein_coding	1.50256	0.0230334
ENSMUSG00000039623,9	Ap5z1	protein_coding	1.5023	0.00990074
ENSMUSG00000037235,9	Mxd4	protein_coding	1.50153	0.0061137
ENSMUSG00000024936,7	Kcnk7	protein_coding	1.50037	0.0171058
ENSMUSG00000024369,12	Nelfe	protein_coding	1.50029	0.00392351
ENSMUSG00000029364,11	Wsb2	protein_coding	1.49954	0.0191156
ENSMUSG00000022996,10	Wnt10b	protein_coding	1.49858	0.0402451
ENSMUSG00000100493,1	Gm29294	lincRNA	1.49849	0.0453345
ENSMUSG00000029797,8	Sspo	protein_coding	1.4973	7.99432e-06
ENSMUSG00000011589,8	Fsd1	protein_coding	1.49727	0.0356729
ENSMUSG00000040724,1	Kcna2	protein_coding	1.49722	0.0290625
ENSMUSG00000028943,13	Espn	protein_coding	1.49699	0.00073359
ENSMUSG00000053388,6	Trim50	protein_coding	1.49696	0.0282075
ENSMUSG00000039474,9	Wfs1	protein_coding	1.49678	0.00335588
ENSMUSG00000020536,8	Llgl1	protein_coding	1.4962	0.0013052
ENSMUSG00000047945,6	Marcksl1	protein_coding	1.49589	0.0457223
ENSMUSG00000024266,7	Adad2	protein_coding	1.49574	0.0155425
ENSMUSG00000022463,7	Srebf2	protein_coding	1.49573	0.000920291
ENSMUSG00000025858,8	Get4	protein_coding	1.49382	0.0148318
ENSMUSG00000063354,6	Slc39a4	protein_coding	1.49287	0.0291755
ENSMUSG00000049866,8	Arl4c	protein_coding	1.49189	0.000873926
ENSMUSG00000030055,12	Rab43	protein_coding	1.49151	0.0037193
ENSMUSG00000043833,6	2900005J15Rik	processed_transcript	1.49135	0.0336254
ENSMUSG00000040722,6	Scamp5	protein_coding	1.49073	0.0154059
ENSMUSG00000006435,11	Neurl1a	protein_coding	1.4907	0.00316512
ENSMUSG00000097057,1	Gm17638	lincRNA	1.49035	0.0155604
ENSMUSG00000029714,7	Gigyf1	protein_coding	1.48986	5.85774e-05
ENSMUSG00000029009,13	Mthfr	protein_coding	1.48953	0.00194697
ENSMUSG00000024944,5	Arl2	protein_coding	1.48872	0.0100145
ENSMUSG00000001240,9	Ramp2	protein_coding	1.48866	0.0150342
ENSMUSG00000028854,9	Slc9a1	protein_coding	1.48855	0.000587697
ENSMUSG00000044551,9	9930012K11Rik	protein_coding	1.48799	0.0327365
ENSMUSG00000034889,7	Cactin	protein_coding	1.48734	0.00520034
ENSMUSG00000041870,12	Ankrd13a	protein_coding	1.48633	0.000917793
ENSMUSG00000058838,9	Rps27a-ps2	processed_pseudogene	1.48599	0.0413654
ENSMUSG00000051043,12	Gprc5c	protein_coding	1.48578	0.00211449
ENSMUSG00000035713,11	Usp35	protein_coding	1.48566	0.00268518
ENSMUSG00000056564,5	Olfr324	protein_coding	1.48531	0.0413654
ENSMUSG00000040356,12	Skiv2l	protein_coding	1.48498	0.00138177
ENSMUSG00000035513,15	Ntng2	protein_coding	1.4849	0.0222703
ENSMUSG00000036620,10	Mgat4b	protein_coding	1.48487	0.00328133
ENSMUSG00000033316,10	Galnt9	protein_coding	1.48482	0.00438501
ENSMUSG00000020782,14	Llgl2	protein_coding	1.48447	0.0010824
ENSMUSG00000031851,10	Ntpcr	protein_coding	1.48446	0.0107453
ENSMUSG00000024365,9	Cyp21a1	protein_coding	1.48427	0.00903598
ENSMUSG00000042109,7	Csdc2	protein_coding	1.48395	0.0106848
ENSMUSG00000024121,9	Atp6v0c	protein_coding	1.48382	0.0119008
ENSMUSG00000020538,11	Srebf1	protein_coding	1.48275	0.00315051
ENSMUSG00000049562,5	Ap5b1	protein_coding	1.48245	0.0150342
ENSMUSG00000022621,12	Rabl2	protein_coding	1.48198	0.0109814
ENSMUSG00000011305,7	Plin5	protein_coding	1.48192	0.0159842
ENSMUSG00000041837,3	Pdcd7	protein_coding	1.48185	0.0147766
ENSMUSG00000005045,12	Chd5	protein_coding	1.48145	9.22443e-05
ENSMUSG00000035735,6	Dagla	protein_coding	1.48145	0.000120557
ENSMUSG00000023484,9	Prph	protein_coding	1.48131	0.043128
ENSMUSG00000038201,9	Kcna7	protein_coding	1.48074	0.0342899
ENSMUSG00000049577,10	Zfpm1	protein_coding	1.4807	0.000928651
ENSMUSG00000024940,10	Ltbp3	protein_coding	1.48019	0.000150876
ENSMUSG00000074577,5	Fam65c	protein_coding	1.47925	0.00205045
ENSMUSG00000017861,7	Mybl2	protein_coding	1.47913	0.00258074
ENSMUSG00000025509,11	Pnpla2	protein_coding	1.47911	0.00950251
ENSMUSG00000030122,10	Ptms	protein_coding	1.47838	0.00508953
ENSMUSG00000028979,13	Masp2	protein_coding	1.4781	0.0481824
ENSMUSG00000045288,10	Ush1g	protein_coding	1.47776	0.0087546
ENSMUSG00000035478,10	Mbd3	protein_coding	1.47758	0.029379
ENSMUSG00000051985,8	Igfn1	protein_coding	1.47737	0.000168177
ENSMUSG00000035355,11	Kcnh4	protein_coding	1.47642	0.00112885
ENSMUSG00000020109,9	Dnajb12	protein_coding	1.47609	0.0112695
ENSMUSG00000037188,7	Grhl3	protein_coding	1.47574	0.000903887
ENSMUSG00000022445,6	Cyp2d26	protein_coding	1.47478	0.0224684
ENSMUSG00000028670,10	Lypla2	protein_coding	1.47442	0.0159801
ENSMUSG00000035569,12	Ankrd11	protein_coding	1.47374	2.9682e-05
ENSMUSG00000038987,8	1700019L03Rik	protein_coding	1.47367	0.0424285
ENSMUSG00000005043,9	Sgsh	protein_coding	1.47358	0.00936602
ENSMUSG00000030748,8	Il4ra	protein_coding	1.47181	0.00632611
ENSMUSG00000045004,3	Spata21	protein_coding	1.4713	0.0048453
ENSMUSG00000032777,8	Gtf3c1	protein_coding	1.47072	0.00021416
ENSMUSG00000020926,12	Adam11	protein_coding	1.47021	0.000351996
ENSMUSG00000032584,8	Mst1r	protein_coding	1.46933	0.0018886
ENSMUSG00000040502,5	March9	protein_coding	1.46905	0.0409692
ENSMUSG00000006498,12	Ptbp1	protein_coding	1.46904	0.0003992
ENSMUSG00000040813,11	Tex264	protein_coding	1.46804	0.00698992
ENSMUSG00000045045,7	Lrfn4	protein_coding	1.46675	0.00100896
ENSMUSG00000033909,13	Usp36	protein_coding	1.46673	0.00019494
ENSMUSG00000024857,12	Cabp2	protein_coding	1.4665	0.00745779
ENSMUSG00000051051,5	Olfr523	protein_coding	1.46647	0.0406842
ENSMUSG00000031787,7	Katnb1	protein_coding	1.46616	0.000657495
ENSMUSG00000040740,7	Slc25a34	protein_coding	1.4651	0.0430798
ENSMUSG00000037820,11	Tgm2	protein_coding	1.46506	0.00144187
ENSMUSG00000029344,10	Tpst2	protein_coding	1.46497	0.00639069
ENSMUSG00000028920,9	Fbxo42	protein_coding	1.46448	0.00250651
ENSMUSG00000035852,6	Misp	protein_coding	1.4643	0.00861527
ENSMUSG00000024960,8	Plcb3	protein_coding	1.46427	0.000166429
ENSMUSG00000025855,9	Prkar1b	protein_coding	1.46416	0.00570699
ENSMUSG00000036718,13	Micall2	protein_coding	1.46413	0.00617592
ENSMUSG00000004207,10	Psap	protein_coding	1.46405	0.0101396
ENSMUSG00000024197,9	Plin3	protein_coding	1.46399	0.0418749
ENSMUSG00000029032,8	Arhgef16	protein_coding	1.46382	0.00523294
ENSMUSG00000024952,8	Rps6ka4	protein_coding	1.4632	0.000177662
ENSMUSG00000022468,7	Endou	protein_coding	1.46282	0.0188522
ENSMUSG00000039838,7	Slc45a1	protein_coding	1.4627	0.00473502
ENSMUSG00000007833,9	Aldh16a1	protein_coding	1.46269	0.0123941
ENSMUSG00000054999,2	Naaladl1	protein_coding	1.46218	0.00021191
ENSMUSG00000024891,5	Slc29a2	protein_coding	1.46216	0.00176596
ENSMUSG00000003380,10	Rabac1	protein_coding	1.46117	0.0373851
ENSMUSG00000003575,9	Crtc1	protein_coding	1.46061	1.68976e-05
ENSMUSG00000033295,9	Ptprf	protein_coding	1.46057	0.000186413
ENSMUSG00000070808,3	Gltscr1	protein_coding	1.46038	0.00322199
ENSMUSG00000038208,9	Pgap3	protein_coding	1.45955	0.0184032
ENSMUSG00000090958,1	Lrrc32	protein_coding	1.45939	0.0103396
ENSMUSG00000038781,6	Stap2	protein_coding	1.45801	0.022973
ENSMUSG00000087408,5	Cers1	protein_coding	1.45746	0.0144003
ENSMUSG00000038792,3	4931403M11Rik	lincRNA	1.45688	0.0196065
ENSMUSG00000034282,3	Evpl	protein_coding	1.45684	0.000654305
ENSMUSG00000025478,11	Dpysl4	protein_coding	1.45675	0.00229219
ENSMUSG00000033955,8	Tnks1bp1	protein_coding	1.45634	0.000210795
ENSMUSG00000021294,7	Kif26a	protein_coding	1.4559	0.0013083
ENSMUSG00000030123,11	Plxnd1	protein_coding	1.45588	0.00111732
ENSMUSG00000045838,8	A430105I19Rik	protein_coding	1.45541	0.000705057
ENSMUSG00000034684,8	Sema3f	protein_coding	1.45529	0.00241156
ENSMUSG00000017446,10	C1qtnf1	protein_coding	1.45388	0.00386949
ENSMUSG00000026514,9	Cnih3	protein_coding	1.45385	0.0223929
ENSMUSG00000029162,11	Khk	protein_coding	1.45344	0.0076171
ENSMUSG00000008601,8	Rab25	protein_coding	1.45335	0.0395375
ENSMUSG00000030350,8	Prmt8	protein_coding	1.45195	0.0220045
ENSMUSG00000001027,7	Scn4a	protein_coding	1.45182	0.000464458
ENSMUSG00000030688,10	Stard10	protein_coding	1.45161	0.0232918
ENSMUSG00000006221,7	Hspb7	protein_coding	1.45158	0.0447445
ENSMUSG00000097767,4	Miat	lincRNA	1.4508	0.000241161
ENSMUSG00000024206,10	Rfx2	protein_coding	1.45047	0.0033862
ENSMUSG00000036931,10	Nfkbid	protein_coding	1.44968	0.0224684
ENSMUSG00000034471,8	Caskin2	protein_coding	1.44858	0.00144187
ENSMUSG00000007950,8	Abhd8	protein_coding	1.44818	0.0333238
ENSMUSG00000014453,3	Blk	protein_coding	1.44756	0.0498241
ENSMUSG00000034863,7	Ano8	protein_coding	1.44733	0.00397411
ENSMUSG00000017756,8	Slc12a7	protein_coding	1.44685	0.000716113
ENSMUSG00000031103,8	Elf4	protein_coding	1.44675	0.00670621
ENSMUSG00000038963,11	Slco4a1	protein_coding	1.44669	0.00194697
ENSMUSG00000004892,9	Bcan	protein_coding	1.4466	0.00436589
ENSMUSG00000071532,6	Gm10335	processed_pseudogene	1.4464	0.0260039
ENSMUSG00000038025,7	Phf2	protein_coding	1.44638	0.0030824
ENSMUSG00000013367,4	Iglon5	protein_coding	1.44516	0.0370074
ENSMUSG00000034039,7	Prss29	protein_coding	1.44481	0.0479512
ENSMUSG00000020198,7	Ap3d1	protein_coding	1.44424	0.00015974
ENSMUSG00000037579,6	Kcnh3	protein_coding	1.44409	0.0144074
ENSMUSG00000018293,4	Pfn1	protein_coding	1.44403	0.036084
ENSMUSG00000043460,6	Elfn2	protein_coding	1.44401	0.00602829
ENSMUSG00000047810,8	Ccdc88b	protein_coding	1.44341	0.000382289
ENSMUSG00000021256,5	Vash1	protein_coding	1.44336	0.0118292
ENSMUSG00000030271,10	Ogg1	protein_coding	1.44323	0.0417506
ENSMUSG00000082286,6	Pisd-ps1	transcribed_unprocessed_pseudogene	1.44305	1.65873e-05
ENSMUSG00000040631,7	Dok4	protein_coding	1.44269	0.0231595
ENSMUSG00000032855,5	Pkd1	protein_coding	1.44249	2.11633e-05
ENSMUSG00000030089,11	Slc41a3	protein_coding	1.44185	0.0278408
ENSMUSG00000021200,10	Asb2	protein_coding	1.44169	0.00836667
ENSMUSG00000024175,1	Tekt4	protein_coding	1.44167	0.0253852
ENSMUSG00000037295,6	Ldlrap1	protein_coding	1.44154	0.00745473
ENSMUSG00000054161,10	Fam83e	protein_coding	1.44146	0.0371276
ENSMUSG00000048232,8	Fbxo10	protein_coding	1.44126	0.0124187
ENSMUSG00000036622,11	Atp13a2	protein_coding	1.44072	0.00130551
ENSMUSG00000002833,10	Hdgfrp2	protein_coding	1.44059	0.00212511
ENSMUSG00000018973,2	Hoxb1	protein_coding	1.44017	0.0315341
ENSMUSG00000001751,9	Naglu	protein_coding	1.44014	0.0203828
ENSMUSG00000049327,13	Setd8	protein_coding	1.44014	0.0250579
ENSMUSG00000017760,11	Ctsa	protein_coding	1.43997	0.00290362
ENSMUSG00000031828,8	Klhl36	protein_coding	1.43984	0.01336
ENSMUSG00000079258,1	Calhm1	protein_coding	1.43978	0.0156614
ENSMUSG00000051169,10	Rpusd3	protein_coding	1.43972	0.031714
ENSMUSG00000001444,2	Tbx21	protein_coding	1.43938	0.0392736
ENSMUSG00000021506,7	Pitx1	protein_coding	1.43901	0.0385499
ENSMUSG00000031813,7	Mvb12a	protein_coding	1.43889	0.0373003
ENSMUSG00000023039,12	Krt7	protein_coding	1.43837	0.00114961
ENSMUSG00000019027,7	Dnah1	protein_coding	1.43828	1.55874e-05
ENSMUSG00000069873,3	4930438A08Rik	protein_coding	1.43814	0.0230923
ENSMUSG00000024941,8	Scyl1	protein_coding	1.43726	0.00194437
ENSMUSG00000025470,10	Zfp511	protein_coding	1.4372	0.0490215
ENSMUSG00000083282,2	Ctsf	protein_coding	1.43633	0.00127715
ENSMUSG00000055944,3	E130018O15Rik	lincRNA	1.43629	0.045288
ENSMUSG00000040841,5	Six5	protein_coding	1.43534	0.0243058
ENSMUSG00000002957,8	Ap2a2	protein_coding	1.43531	0.0049502
ENSMUSG00000067615,3	Krt81	protein_coding	1.43508	0.0269962
ENSMUSG00000018287,8	Spag7	protein_coding	1.43485	0.0296358
ENSMUSG00000036500,4	Akp3	protein_coding	1.43473	0.0421317
ENSMUSG00000001576,10	Ergic1	protein_coding	1.43453	0.00140651
ENSMUSG00000004934,9	Pias4	protein_coding	1.43449	0.00275611
ENSMUSG00000097006,3	9530082P21Rik	lincRNA	1.4344	0.0164442
ENSMUSG00000038967,9	Pdk2	protein_coding	1.43379	0.00612864
ENSMUSG00000049382,9	Krt8	protein_coding	1.43351	0.0211071
ENSMUSG00000049353,13	Rd3	protein_coding	1.43335	0.00930261
ENSMUSG00000046380,3	Jrk	protein_coding	1.43185	0.0305666
ENSMUSG00000005881,9	Ergic3	protein_coding	1.43129	0.0180983
ENSMUSG00000006585,2	Cdt1	protein_coding	1.43109	0.00378077
ENSMUSG00000040247,5	Tbc1d10c	protein_coding	1.43092	0.0211559
ENSMUSG00000019470,8	Xab2	protein_coding	1.43049	0.000837031
ENSMUSG00000030124,2	Lag3	protein_coding	1.42992	0.0293665
ENSMUSG00000025480,4	Syce1	protein_coding	1.42938	0.0346268
ENSMUSG00000020686,8	Gas2l2	protein_coding	1.42912	0.0150125
ENSMUSG00000063564,9	Col23a1	protein_coding	1.42893	0.000241161
ENSMUSG00000022620,10	Arsa	protein_coding	1.4288	0.0140748
ENSMUSG00000037974,11	Muc5ac	protein_coding	1.42859	0.000136461
ENSMUSG00000030324,6	Rho	protein_coding	1.42825	0.0350954
ENSMUSG00000038366,11	Lasp1	protein_coding	1.42785	0.000185325
ENSMUSG00000029135,9	Fosl2	protein_coding	1.42765	0.000548131
ENSMUSG00000050989,9	Sepn1	protein_coding	1.42754	0.0243099
ENSMUSG00000020887,3	A230052G05Rik	protein_coding	1.42743	0.0324485
ENSMUSG00000024922,1	Ovol1	protein_coding	1.42697	0.00533403
ENSMUSG00000004100,7	Ppan	protein_coding	1.42671	0.00937519
ENSMUSG00000006378,9	Gcat	protein_coding	1.42642	0.00150393
ENSMUSG00000006362,11	Cbfa2t3	protein_coding	1.42601	0.000204095
ENSMUSG00000024187,10	Itfg3	protein_coding	1.42601	0.018453
ENSMUSG00000036565,3	Ttyh3	protein_coding	1.42494	0.00157997
ENSMUSG00000030433,10	Sbk2	protein_coding	1.42484	0.0288323
ENSMUSG00000034254,13	Agpat1	protein_coding	1.42478	0.00235335
ENSMUSG00000096037,1	n-R5s136	rRNA	1.42459	0.041741
ENSMUSG00000036918,11	Ttc7	protein_coding	1.42378	0.000186413
ENSMUSG00000028896,9	Rcc1	protein_coding	1.42314	0.00616034
ENSMUSG00000037003,11	Tenc1	protein_coding	1.42307	0.00250667
ENSMUSG00000007836,6	Hnrnpa0	protein_coding	1.42307	0.0413654
ENSMUSG00000042419,8	Nfkbil1	protein_coding	1.4228	0.010596
ENSMUSG00000038060,11	Dlec1	protein_coding	1.42201	0.000556905
ENSMUSG00000061589,10	Dot1l	protein_coding	1.42173	0.000327852
ENSMUSG00000022283,10	Pabpc1	protein_coding	1.42152	0.0265188
ENSMUSG00000031706,6	Rfx1	protein_coding	1.4214	0.00337542
ENSMUSG00000002812,4	Flii	protein_coding	1.42135	0.000665999
ENSMUSG00000007034,11	Slc44a4	protein_coding	1.4205	0.00328472
ENSMUSG00000059498,9	Fcgr3	protein_coding	1.42045	0.00513752
ENSMUSG00000037995,11	Igsf9	protein_coding	1.42032	0.00104941
ENSMUSG00000031452,10	1700029H14Rik	protein_coding	1.42027	0.0173442
ENSMUSG00000052951,5	C130021I20Rik	antisense	1.42026	0.0079297
ENSMUSG00000028631,7	Kcnq4	protein_coding	1.42013	0.0118704
ENSMUSG00000030435,11	U2af2	protein_coding	1.41976	0.022682
ENSMUSG00000024160,12	Spsb3	protein_coding	1.41971	0.0453345
ENSMUSG00000020090,6	Npffr1	protein_coding	1.41906	0.024522
ENSMUSG00000044502,12	Bod1	protein_coding	1.4189	0.0103974
ENSMUSG00000060275,7	Nrg2	protein_coding	1.41865	0.0391128
ENSMUSG00000023951,12	Vegfa	protein_coding	1.41803	0.00140651
ENSMUSG00000008090,10	Fgfrl1	protein_coding	1.41749	0.0435051
ENSMUSG00000045248,5	Med26	protein_coding	1.41724	0.0198008
ENSMUSG00000024927,7	Rela	protein_coding	1.41673	0.00808322
ENSMUSG00000025401,8	Myo1a	protein_coding	1.41633	0.00140164
ENSMUSG00000014782,11	Plekhg4	protein_coding	1.41627	0.00182359
ENSMUSG00000034105,8	Tldc1	protein_coding	1.41594	0.00804712
ENSMUSG00000022603,5	Mroh4	protein_coding	1.41503	0.00703797
ENSMUSG00000032741,8	Tpcn1	protein_coding	1.4144	0.00142497
ENSMUSG00000083722,1	Gpr144-ps	transcribed_unprocessed_pseudogene	1.41374	0.024367
ENSMUSG00000024180,9	Tmem8	protein_coding	1.41315	0.0012146
ENSMUSG00000034220,7	Gpc1	protein_coding	1.41307	0.00195947
ENSMUSG00000025880,7	Smad7	protein_coding	1.41307	0.0162764
ENSMUSG00000020424,3	Gatsl3	protein_coding	1.41304	0.0480252
ENSMUSG00000094989,1	Rpl9-ps4	processed_pseudogene	1.41191	0.00491722
ENSMUSG00000040009,5	Gnaz	protein_coding	1.41166	0.0126925
ENSMUSG00000028969,6	Cdk5	protein_coding	1.41148	0.0135188
ENSMUSG00000024168,7	Tmem204	protein_coding	1.41148	0.00951201
ENSMUSG00000000325,11	Arvcf	protein_coding	1.41132	0.00328133
ENSMUSG00000046971,7	Pla2g4f	protein_coding	1.41128	0.00623508
ENSMUSG00000061046,5	Haghl	protein_coding	1.41041	0.00239944
ENSMUSG00000039349,5	C130074G19Rik	protein_coding	1.41011	0.0134292
ENSMUSG00000059713,8	Rcan3	protein_coding	1.41007	0.0181301
ENSMUSG00000020893,13	Per1	protein_coding	1.41006	0.000984433
ENSMUSG00000002870,7	Mcm2	protein_coding	1.40912	0.00491496
ENSMUSG00000023336,5	Wfdc1	protein_coding	1.40907	0.0311233
ENSMUSG00000029033,12	Acap3	protein_coding	1.40765	0.00163799
ENSMUSG00000031995,4	St14	protein_coding	1.40729	0.00315051
ENSMUSG00000078789,5	Dph1	protein_coding	1.40681	0.00703797
ENSMUSG00000027314,6	Dll4	protein_coding	1.40671	0.00788548
ENSMUSG00000063268,8	Parp10	protein_coding	1.40665	0.0282075
ENSMUSG00000004558,10	Ndrg2	protein_coding	1.40574	0.0314226
ENSMUSG00000040952,12	Rps19	protein_coding	1.40556	0.00497162
ENSMUSG00000039640,7	Mrpl12	protein_coding	1.40541	0.0487908
ENSMUSG00000074652,3	Myh7b	protein_coding	1.40491	0.000500168
ENSMUSG00000025371,8	Chmp6	protein_coding	1.40393	0.026368
ENSMUSG00000039781,10	Cep131	protein_coding	1.40367	0.00146876
ENSMUSG00000025736,10	Jmjd8	protein_coding	1.40326	0.0164054
ENSMUSG00000018008,7	Cyth4	protein_coding	1.40277	0.0239504
ENSMUSG00000028785,8	Hpca	protein_coding	1.40251	0.0194564
ENSMUSG00000020704,9	Asic2	protein_coding	1.40202	0.00258689
ENSMUSG00000037552,13	Plekhg2	protein_coding	1.40188	0.00198037
ENSMUSG00000068328,7	Aup1	protein_coding	1.40098	0.0341363
ENSMUSG00000025579,10	Gaa	protein_coding	1.40097	0.00205045
ENSMUSG00000097381,1	A230087F16Rik	lincRNA	1.40084	0.039923
ENSMUSG00000029581,10	Fscn1	protein_coding	1.4006	0.00383458
ENSMUSG00000015656,12	Hspa8	protein_coding	1.40058	0.0463664
ENSMUSG00000050164,10	Mchr1	protein_coding	1.40048	0.0484244
ENSMUSG00000022994,8	Adcy6	protein_coding	1.40039	0.0021116
ENSMUSG00000028860,9	Sytl1	protein_coding	1.39977	0.0155946
ENSMUSG00000030329,7	Pianp	protein_coding	1.39971	0.00504659
ENSMUSG00000027368,6	Dusp2	protein_coding	1.39918	0.0366369
ENSMUSG00000072812,4	Ahnak2	protein_coding	1.39911	0.000618218
ENSMUSG00000015377,9	Dennd6b	protein_coding	1.39886	0.0105208
ENSMUSG00000039337,3	Tex19,2	protein_coding	1.39884	0.0344286
ENSMUSG00000010755,12	Cars	protein_coding	1.39864	0.000819892
ENSMUSG00000024219,11	Anks1	protein_coding	1.39823	0.000370032
ENSMUSG00000025854,11	Fam20c	protein_coding	1.3979	0.00337889
ENSMUSG00000071714,5	Csf2rb2	protein_coding	1.39734	0.0025312
ENSMUSG00000050751,10	Pgbd5	protein_coding	1.39721	0.00110239
ENSMUSG00000031783,9	Polr2c	protein_coding	1.39669	0.024735
ENSMUSG00000026519,12	Tmem63a	protein_coding	1.39571	0.00187166
ENSMUSG00000010047,8	Hyal2	protein_coding	1.39561	0.0152398
ENSMUSG00000047841,8	BC051628	protein_coding	1.39503	0.0445826
ENSMUSG00000028749,7	Pla2g2f	protein_coding	1.39502	0.027796
ENSMUSG00000034926,3	Dhcr24	protein_coding	1.39463	0.00684003
ENSMUSG00000030724,6	Cd19	protein_coding	1.39455	0.0428826
ENSMUSG00000006462,6	A530013C23Rik	lincRNA	1.39321	0.0052268
ENSMUSG00000026821,11	Ralgds	protein_coding	1.39305	0.0021665
ENSMUSG00000023008,14	Fmnl3	protein_coding	1.39239	0.00117122
ENSMUSG00000085925,2	Rtl1	protein_coding	1.39236	0.000285027
ENSMUSG00000074247,6	Dda1	protein_coding	1.39186	0.0251361
ENSMUSG00000020692,10	Nle1	protein_coding	1.3907	0.0227316
ENSMUSG00000062372,9	Otof	protein_coding	1.39046	5.03192e-05
ENSMUSG00000047641,7	Krt83	protein_coding	1.39034	0.0343923
ENSMUSG00000056737,10	Capg	protein_coding	1.39027	0.0013137
ENSMUSG00000040761,12	Spen	protein_coding	1.38976	0.000248089
ENSMUSG00000022562,9	Oplah	protein_coding	1.38823	0.00650773
ENSMUSG00000047003,10	Zfp41	protein_coding	1.38814	0.0377476
ENSMUSG00000001864,9	Aif1l	protein_coding	1.38786	0.000931386
ENSMUSG00000003581,10	Rnf215	protein_coding	1.38774	0.039586
ENSMUSG00000024665,7	Fads2	protein_coding	1.3876	0.0106823
ENSMUSG00000058392,8	Rrp1b	protein_coding	1.38729	0.000518478
ENSMUSG00000015474,12	Ppt2	protein_coding	1.38592	0.0487653
ENSMUSG00000023473,7	Celsr3	protein_coding	1.38569	0.000111303
ENSMUSG00000027134,4	Lpcat4	protein_coding	1.38415	0.0295351
ENSMUSG00000051007,10	Pddc1	protein_coding	1.38394	0.0220926
ENSMUSG00000053550,9	Shisa7	protein_coding	1.38388	0.00731007
ENSMUSG00000040479,7	Dgkz	protein_coding	1.38359	0.00063307
ENSMUSG00000029556,8	Hnf1a	protein_coding	1.38277	0.0284791
ENSMUSG00000022394,10	L3mbtl2	protein_coding	1.38222	0.00431135
ENSMUSG00000025494,7	Sigirr	protein_coding	1.38111	0.0474301
ENSMUSG00000038500,11	Prr3	protein_coding	1.38093	0.000946241
ENSMUSG00000032294,12	Pkm	protein_coding	1.3807	0.00433352
ENSMUSG00000020277,9	Pfkl	protein_coding	1.38013	0.00263524
ENSMUSG00000025648,13	Pfkfb4	protein_coding	1.38006	0.00738082
ENSMUSG00000033987,11	Dnah17	protein_coding	1.38006	9.53411e-05
ENSMUSG00000032172,7	Olfm2	protein_coding	1.37981	0.042898
ENSMUSG00000029103,12	Lrpap1	protein_coding	1.37921	0.0129846
ENSMUSG00000014158,7	Trpv4	protein_coding	1.37915	0.00202891
ENSMUSG00000025877,10	Hk3	protein_coding	1.37911	0.00415718
ENSMUSG00000040533,7	Matn1	protein_coding	1.37889	0.0131179
ENSMUSG00000028919,7	Arhgef19	protein_coding	1.37838	0.00342809
ENSMUSG00000009681,9	Bcr	protein_coding	1.37803	0.000177765
ENSMUSG00000078907,1	Fam186b	protein_coding	1.37735	0.00698992
ENSMUSG00000103220,1	RP23-459L15,8	TEC	1.3767	0.0252392
ENSMUSG00000050463,8	Krt78	protein_coding	1.37561	0.0182416
ENSMUSG00000028582,10	Cc2d1b	protein_coding	1.3749	0.0131585
ENSMUSG00000079511,5	Ccdc142	protein_coding	1.37366	0.0273712
ENSMUSG00000052301,10	Doc2a	protein_coding	1.37359	0.0353466
ENSMUSG00000096798,1	Gm6309	protein_coding	1.37357	0.0279149
ENSMUSG00000002791,12	Pdxk-ps	transcribed_unprocessed_pseudogene	1.37315	0.00484657
ENSMUSG00000038167,6	Plekhg6	protein_coding	1.37292	0.00877009
ENSMUSG00000057101,6	Zfp180	protein_coding	1.37279	0.00620025
ENSMUSG00000048385,8	Scrt1	protein_coding	1.37221	0.016529
ENSMUSG00000021280,8	Exoc3l4	protein_coding	1.3718	0.00552009
ENSMUSG00000042594,12	Sh2b3	protein_coding	1.37159	0.0103019
ENSMUSG00000003200,9	Sh3gl1	protein_coding	1.37153	0.0446282
ENSMUSG00000022211,8	Lrrc16b	protein_coding	1.37103	0.0122872
ENSMUSG00000051435,7	Fhad1	protein_coding	1.37077	0.000639416
ENSMUSG00000038390,9	Gpr162	protein_coding	1.37053	0.0296626
ENSMUSG00000028799,11	Zfp362	protein_coding	1.36983	0.0406039
ENSMUSG00000028066,11	Pmf1	protein_coding	1.36958	0.0418749
ENSMUSG00000027485,11	Bpifb1	protein_coding	1.3695	0.0132481
ENSMUSG00000009555,12	Cdk9	protein_coding	1.36929	0.00965653
ENSMUSG00000013787,11	Ehmt2	protein_coding	1.36876	0.00115495
ENSMUSG00000050592,8	Fam78a	protein_coding	1.36862	0.0222082
ENSMUSG00000070304,7	Scn2b	protein_coding	1.36699	0.0139939
ENSMUSG00000036138,12	Acaa1a	protein_coding	1.36683	0.00505658
ENSMUSG00000044037,11	Als2cl	protein_coding	1.36658	0.00021416
ENSMUSG00000048154,12	Kmt2d	protein_coding	1.36644	0.000137295
ENSMUSG00000029713,11	Gnb2	protein_coding	1.36574	0.010115
ENSMUSG00000035745,4	Grin3b	protein_coding	1.36523	0.0107071
ENSMUSG00000049728,10	Zfp668	protein_coding	1.3652	0.00165555
ENSMUSG00000050390,8	C77080	protein_coding	1.36518	0.0052268
ENSMUSG00000075024,2	Gm10803	protein_coding	1.36508	0.0477447
ENSMUSG00000010044,8	Zmynd10	protein_coding	1.36409	0.0258041
ENSMUSG00000017478,11	Zc3h18	protein_coding	1.36356	4.82629e-05
ENSMUSG00000005553,9	Atp4a	protein_coding	1.36327	0.0178825
ENSMUSG00000026785,10	Pkn3	protein_coding	1.36326	0.0150891
ENSMUSG00000039084,8	Chad	protein_coding	1.36323	0.0297333
ENSMUSG00000050671,8	Ism2	protein_coding	1.36317	0.0430946
ENSMUSG00000000884,12	Gnb1l	protein_coding	1.36304	0.0106867
ENSMUSG00000039656,12	Rxrb	protein_coding	1.36286	0.0124087
ENSMUSG00000029001,11	Fbxo44	protein_coding	1.36262	0.0433546
ENSMUSG00000025702,11	March8	protein_coding	1.36259	0.00144187
ENSMUSG00000029602,7	Rasal1	protein_coding	1.36123	0.00703797
ENSMUSG00000033253,14	Szt2	protein_coding	1.36112	4.71258e-05
ENSMUSG00000030093,6	Wnt7a	protein_coding	1.36056	0.0194901
ENSMUSG00000040860,12	Crocc	protein_coding	1.36035	0.00121569
ENSMUSG00000020806,11	Rhbdf2	protein_coding	1.35938	0.00340666
ENSMUSG00000047507,8	Baiap3	protein_coding	1.35907	0.00491726
ENSMUSG00000025132,9	Arhgdia	protein_coding	1.35852	0.0206752
ENSMUSG00000032589,10	Bsn	protein_coding	1.35822	0.000264741
ENSMUSG00000027463,10	Slc52a3	protein_coding	1.35754	0.0177088
ENSMUSG00000039308,5	Ndst2	protein_coding	1.35713	0.00415718
ENSMUSG00000055805,10	Fmnl1	protein_coding	1.35694	0.000805427
ENSMUSG00000074899,4	Sptbn5	protein_coding	1.35687	0.000148139
ENSMUSG00000000214,6	Th	protein_coding	1.35675	0.00541064
ENSMUSG00000085902,1	Gm12200	antisense	1.35668	0.0210851
ENSMUSG00000029151,10	Slc30a3	protein_coding	1.3566	0.0306864
ENSMUSG00000095134,2	Gm21857	unprocessed_pseudogene	1.35633	0.00686404
ENSMUSG00000025402,8	Nab2	protein_coding	1.35624	0.0327165
ENSMUSG00000017639,9	Rab11fip4	protein_coding	1.35588	0.000449896
ENSMUSG00000002307,11	Daxx	protein_coding	1.35566	0.00375086
ENSMUSG00000068551,8	Zfp467	protein_coding	1.35562	0.00612763
ENSMUSG00000011884,9	Gltp	protein_coding	1.35561	0.0447222
ENSMUSG00000018474,13	Chd3	protein_coding	1.35529	0.000186413
ENSMUSG00000019461,8	Plscr3	protein_coding	1.35516	0.0258253
ENSMUSG00000053093,11	Myh7	protein_coding	1.3548	0.000464577
ENSMUSG00000047731,13	Wbp1l	protein_coding	1.35448	0.000808166
ENSMUSG00000007783,9	Cpt1c	protein_coding	1.35393	0.00187172
ENSMUSG00000060950,7	Trmt61a	protein_coding	1.35365	0.0229036
ENSMUSG00000022623,11	Shank3	protein_coding	1.35347	0.0061406
ENSMUSG00000051786,10	Tubgcp6	protein_coding	1.35204	0.000764365
ENSMUSG00000023992,10	Trem2	protein_coding	1.35172	0.00496425
ENSMUSG00000026278,10	Bok	protein_coding	1.3511	0.025869
ENSMUSG00000042404,12	Dennd4b	protein_coding	1.35109	0.0040306
ENSMUSG00000031776,12	Arl2bp	protein_coding	1.35092	0.0204994
ENSMUSG00000029055,13	Plch2	protein_coding	1.35068	0.00130551
ENSMUSG00000042677,7	Zc3h12a	protein_coding	1.35047	0.0187295
ENSMUSG00000063952,11	Brpf3	protein_coding	1.35009	0.00043391
ENSMUSG00000029036,14	Atad3a	protein_coding	1.34984	0.0106945
ENSMUSG00000058301,6	Upf1	protein_coding	1.34968	0.000677389
ENSMUSG00000040471,13	Ggt6	protein_coding	1.34965	0.0421553
ENSMUSG00000026941,12	Mamdc4	protein_coding	1.34936	0.00583691
ENSMUSG00000103984,1	RP24-286D13,3	TEC	1.34917	0.00484657
ENSMUSG00000022220,9	Adcy4	protein_coding	1.34839	0.00612763
ENSMUSG00000002835,8	Chaf1a	protein_coding	1.34803	0.031692
ENSMUSG00000038324,9	Trpc4ap	protein_coding	1.34744	0.00126242
ENSMUSG00000000743,8	Chmp1a	protein_coding	1.34714	0.0266974
ENSMUSG00000028778,11	Hcrtr1	protein_coding	1.34703	0.0222689
ENSMUSG00000087291,1	Gm11946	processed_transcript	1.34685	0.024448
ENSMUSG00000057176,3	Gm166	protein_coding	1.34668	0.0218184
ENSMUSG00000029512,7	Ulk1	protein_coding	1.34588	0.0051356
ENSMUSG00000026511,7	Srp9	protein_coding	1.34533	0.0129797
ENSMUSG00000031885,9	Cbfb	protein_coding	1.34527	0.00560409
ENSMUSG00000037326,9	Capn15	protein_coding	1.34524	0.00709388
ENSMUSG00000059248,9	Sept9	protein_coding	1.34518	0.000464577
ENSMUSG00000061111,8	Fam195b	protein_coding	1.34505	0.0478512
ENSMUSG00000004105,7	Angptl2	protein_coding	1.34466	0.0173482
ENSMUSG00000012126,12	Ubxn11	protein_coding	1.34428	0.0227316
ENSMUSG00000026816,10	Gtf3c5	protein_coding	1.34418	0.00214959
ENSMUSG00000056692,8	D17Wsu92e	protein_coding	1.3431	0.00462803
ENSMUSG00000003863,12	Ppfia3	protein_coding	1.34306	0.00115864
ENSMUSG00000038534,13	Osbpl7	protein_coding	1.34225	0.000965231
ENSMUSG00000039844,15	Rapgef1	protein_coding	1.34205	0.000910533
ENSMUSG00000029430,9	Ran	protein_coding	1.34166	0.00444478
ENSMUSG00000032936,9	Camkv	protein_coding	1.34144	0.00633608
ENSMUSG00000001985,9	Grik3	protein_coding	1.34132	0.00210119
ENSMUSG00000045246,7	Kcng4	protein_coding	1.34098	0.00286606
ENSMUSG00000028758,8	Kif17	protein_coding	1.3408	0.00740013
ENSMUSG00000079466,2	Prdm12	protein_coding	1.34076	0.0265877
ENSMUSG00000056605,6	Krt72	protein_coding	1.34053	0.0323096
ENSMUSG00000084845,5	Tmem240	protein_coding	1.34012	0.00930261
ENSMUSG00000029392,8	Rilpl1	protein_coding	1.33999	0.0173482
ENSMUSG00000071076,5	Jund	protein_coding	1.33979	0.00723159
ENSMUSG00000038437,7	Mllt6	protein_coding	1.33974	0.00197897
ENSMUSG00000078350,7	Smim1	protein_coding	1.33972	0.0213432
ENSMUSG00000020224,10	Llph	protein_coding	1.33953	0.00422738
ENSMUSG00000037606,13	Osbpl5	protein_coding	1.33914	0.00108004
ENSMUSG00000024663,13	Rab3il1	protein_coding	1.33909	0.00139107
ENSMUSG00000043388,7	Tmem130	protein_coding	1.33795	0.0170269
ENSMUSG00000051403,8	Ppp1r37	protein_coding	1.33757	0.0283078
ENSMUSG00000021215,10	Net1	protein_coding	1.33756	0.0092137
ENSMUSG00000030127,11	Cops7a	protein_coding	1.3375	0.0278351
ENSMUSG00000034854,8	Mfsd12	protein_coding	1.3367	0.020828
ENSMUSG00000038582,11	Pptc7	protein_coding	1.33643	0.00480459
ENSMUSG00000040276,10	Pacsin1	protein_coding	1.3359	0.00377698
ENSMUSG00000024140,9	Epas1	protein_coding	1.33582	0.00694805
ENSMUSG00000023143,6	Nagpa	protein_coding	1.33578	0.0412768
ENSMUSG00000074818,8	Pdzd7	protein_coding	1.33571	0.000376838
ENSMUSG00000002908,11	Kcnn1	protein_coding	1.33565	0.00780684
ENSMUSG00000069922,7	Ces3a	protein_coding	1.33556	0.0221342
ENSMUSG00000064267,9	Hvcn1	protein_coding	1.33507	0.0200511
ENSMUSG00000079091,1	Gm3404	protein_coding	1.33488	0.0079729
ENSMUSG00000031543,14	Ank1	protein_coding	1.33482	0.000128747
ENSMUSG00000020932,10	Gfap	protein_coding	1.33408	0.00350778
ENSMUSG00000039477,12	Tnrc18	protein_coding	1.33305	0.00139117
ENSMUSG00000068699,8	Flnc	protein_coding	1.33274	0.00021191
ENSMUSG00000036553,12	Sh3tc1	protein_coding	1.33271	0.00198037
ENSMUSG00000021486,6	Prelid1	protein_coding	1.33264	0.0461886
ENSMUSG00000024034,8	Tmprss3	protein_coding	1.33234	0.0199014
ENSMUSG00000040532,10	Abhd11	protein_coding	1.33227	0.0177817
ENSMUSG00000034707,6	Gns	protein_coding	1.33223	0.00441123
ENSMUSG00000020267,6	Hint1	protein_coding	1.33216	0.0378575
ENSMUSG00000029053,12	Prkcz	protein_coding	1.33208	0.00415718
ENSMUSG00000024913,12	Lrp5	protein_coding	1.33186	0.000241161
ENSMUSG00000028978,8	Nos3	protein_coding	1.33155	0.00313166
ENSMUSG00000031207,12	Msn	protein_coding	1.33115	0.00930261
ENSMUSG00000011752,6	Pgam1	protein_coding	1.33043	0.0333291
ENSMUSG00000024041,8	Cryaa	protein_coding	1.32948	0.0428826
ENSMUSG00000057530,10	Ece1	protein_coding	1.32832	0.00296187
ENSMUSG00000032788,10	Pdxk	protein_coding	1.32812	0.0029756
ENSMUSG00000034781,5	Gna11	protein_coding	1.32732	0.0167517
ENSMUSG00000048707,9	Tprn	protein_coding	1.32723	0.0478512
ENSMUSG00000079662,1	Ntn3	protein_coding	1.32661	0.0112418
ENSMUSG00000030538,11	Cib1	protein_coding	1.3262	0.0408066
ENSMUSG00000028838,7	Extl1	protein_coding	1.32578	0.0268342
ENSMUSG00000028745,14	Capzb	protein_coding	1.32517	0.00280507
ENSMUSG00000028782,10	Bai2	protein_coding	1.32493	0.0409173
ENSMUSG00000037348,11	Paqr7	protein_coding	1.3247	0.00730294
ENSMUSG00000063229,10	Ldha	protein_coding	1.32468	0.0140748
ENSMUSG00000067613,5	5430421N21Rik	protein_coding	1.32406	0.043583
ENSMUSG00000020918,10	Kat2a	protein_coding	1.32402	0.00501528
ENSMUSG00000036180,10	Gatad2a	protein_coding	1.32399	0.00397411
ENSMUSG00000024664,4	Fads3	protein_coding	1.32355	0.00138734
ENSMUSG00000042178,5	Armc5	protein_coding	1.32337	0.00305368
ENSMUSG00000066279,2	Chrna10	protein_coding	1.32331	0.0438844
ENSMUSG00000034730,12	Bai1	protein_coding	1.32312	0.00116953
ENSMUSG00000019139,9	Isyna1	protein_coding	1.32307	0.0161027
ENSMUSG00000018537,12	Pcgf2	protein_coding	1.32279	0.00812032
ENSMUSG00000028796,13	Phc2	protein_coding	1.32218	0.000498721
ENSMUSG00000030741,11	Spns1	protein_coding	1.32214	0.0353466
ENSMUSG00000042115,4	Klhdc8a	protein_coding	1.32203	0.00957434
ENSMUSG00000025225,10	Nfkb2	protein_coding	1.32142	0.000998658
ENSMUSG00000006574,11	Slc4a1	protein_coding	1.32125	0.00213919
ENSMUSG00000096344,1	Gm6408	protein_coding	1.31994	0.0480252
ENSMUSG00000028862,6	Map3k6	protein_coding	1.31982	0.00639069
ENSMUSG00000033006,9	Sox10	protein_coding	1.31979	0.00201147
ENSMUSG00000097559,1	D430018E03Rik	lincRNA	1.31969	0.016126
ENSMUSG00000097476,1	Gm26583	lincRNA	1.31944	0.0120371
ENSMUSG00000002831,9	Plin4	protein_coding	1.31898	0.0152856
ENSMUSG00000034224,10	Slc38a8	protein_coding	1.31883	0.00616303
ENSMUSG00000025538,11	Sumf2	protein_coding	1.31879	0.0241106
ENSMUSG00000025207,11	Sema4g	protein_coding	1.31868	0.00285163
ENSMUSG00000028917,10	Plekhm2	protein_coding	1.31857	0.00426466
ENSMUSG00000033170,10	Card10	protein_coding	1.3183	0.000945578
ENSMUSG00000016554,8	Eif3d	protein_coding	1.31827	0.029066
ENSMUSG00000031983,6	2310022B05Rik	protein_coding	1.31822	0.00295107
ENSMUSG00000034917,7	Tjp3	protein_coding	1.31776	0.00905359
ENSMUSG00000020329,8	Polrmt	protein_coding	1.31774	0.00811725
ENSMUSG00000030088,11	Aldh1l1	protein_coding	1.31626	0.0105208
ENSMUSG00000026883,13	Dab2ip	protein_coding	1.31533	0.000704272
ENSMUSG00000032114,8	Slc37a4	protein_coding	1.31504	0.0241466
ENSMUSG00000034022,7	Cpsf1	protein_coding	1.31489	0.00532906
ENSMUSG00000075025,6	Gm10804	lincRNA	1.31447	0.0374039
ENSMUSG00000038141,8	Tmem181a	protein_coding	1.31441	0.0311986
ENSMUSG00000025226,7	Fbxl15	protein_coding	1.31418	0.0265054
ENSMUSG00000033762,7	Recql4	protein_coding	1.31408	0.0195951
ENSMUSG00000062661,6	Ncs1	protein_coding	1.31406	0.00692217
ENSMUSG00000048696,10	Mex3d	protein_coding	1.31396	0.0413288
ENSMUSG00000070691,6	Runx3	protein_coding	1.31386	0.0266974
ENSMUSG00000070576,4	Mn1	protein_coding	1.31314	0.00527918
ENSMUSG00000029712,10	Actl6b	protein_coding	1.31289	0.0222064
ENSMUSG00000049482,11	Ctu2	protein_coding	1.31241	0.00484657
ENSMUSG00000043986,5	Spata31d1d	protein_coding	1.31203	0.0156912
ENSMUSG00000002948,14	Map2k7	protein_coding	1.31199	0.00328534
ENSMUSG00000018677,5	Slc25a39	protein_coding	1.31152	0.021656
ENSMUSG00000020785,13	Camkk1	protein_coding	1.31128	0.0120503
ENSMUSG00000026965,8	Anapc2	protein_coding	1.3112	0.00500934
ENSMUSG00000079215,4	Zfp664	protein_coding	1.31066	0.00221678
ENSMUSG00000034807,8	Colgalt1	protein_coding	1.31046	0.00625889
ENSMUSG00000103101,1	RP23-309A8,4	TEC	1.31045	0.0474113
ENSMUSG00000030838,13	Ush1c	protein_coding	1.31044	0.00392022
ENSMUSG00000001138,9	Cnnm3	protein_coding	1.31031	0.00984799
ENSMUSG00000030079,11	Ruvbl1	protein_coding	1.30936	0.0329952
ENSMUSG00000033685,8	Ucp2	protein_coding	1.30927	0.0089177
ENSMUSG00000032363,11	Adamts7	protein_coding	1.3091	0.00328325
ENSMUSG00000023411,7	Nfatc4	protein_coding	1.3087	0.0312528
ENSMUSG00000033871,10	Ppargc1b	protein_coding	1.30775	0.00808278
ENSMUSG00000024124,5	Prss30	protein_coding	1.30749	0.0382338
ENSMUSG00000031078,11	Cttn	protein_coding	1.30747	0.00239764
ENSMUSG00000031816,10	Mthfsd	protein_coding	1.30735	0.000903887
ENSMUSG00000017697,3	Ada	protein_coding	1.30623	0.0400598
ENSMUSG00000023978,5	Prph2	protein_coding	1.30619	0.0393589
ENSMUSG00000037466,9	4930427A07Rik	protein_coding	1.30619	0.0117139
ENSMUSG00000056076,9	Eif3b	protein_coding	1.3055	0.00237038
ENSMUSG00000028936,11	Rpl22	protein_coding	1.30531	0.0177228
ENSMUSG00000033161,9	Atp1a1	protein_coding	1.30518	0.0029522
ENSMUSG00000038351,10	Sgsm2	protein_coding	1.30478	0.0025312
ENSMUSG00000049739,9	Zfp646	protein_coding	1.3047	0.00158252
ENSMUSG00000029005,4	Draxin	protein_coding	1.30434	0.0205085
ENSMUSG00000030098,11	Grip2	protein_coding	1.30418	0.00484657
ENSMUSG00000051726,6	Kcnf1	protein_coding	1.30388	0.0267777
ENSMUSG00000041528,11	Rnf123	protein_coding	1.30373	0.00158171
ENSMUSG00000039492,7	Ccdc27	protein_coding	1.30356	0.0324287
ENSMUSG00000026811,14	St6galnac6	protein_coding	1.30351	0.0134162
ENSMUSG00000002658,9	Gtf2f1	protein_coding	1.30331	0.0101853
ENSMUSG00000010311,11	Optc	protein_coding	1.30275	0.00927334
ENSMUSG00000027075,12	Slc43a1	protein_coding	1.30214	0.00881454
ENSMUSG00000024215,9	Spdef	protein_coding	1.3013	0.0440125
ENSMUSG00000002342,13	Tmem161a	protein_coding	1.30108	0.00914168
ENSMUSG00000010651,4	Acaa1b	protein_coding	1.30045	0.0285812
ENSMUSG00000039678,8	Tbc1d13	protein_coding	1.29963	0.0213448
ENSMUSG00000036199,8	Ndufa13	protein_coding	1.29941	0.0418879
ENSMUSG00000002486,11	Tchp	protein_coding	1.29911	0.0017082
ENSMUSG00000029554,11	Mad1l1	protein_coding	1.29889	0.00504659
ENSMUSG00000041423,12	Paqr6	protein_coding	1.29879	0.0482959
ENSMUSG00000025372,12	Baiap2	protein_coding	1.29835	0.00347253
ENSMUSG00000031881,5	Cdh16	protein_coding	1.29815	0.0167358
ENSMUSG00000030374,11	Strn4	protein_coding	1.29797	0.0013137
ENSMUSG00000097820,2	E530011L22Rik	TEC	1.29787	0.0250282
ENSMUSG00000045438,8	Cox19	protein_coding	1.29778	0.0264007
ENSMUSG00000018334,12	Ksr1	protein_coding	1.29768	0.00111693
ENSMUSG00000044456,12	Rin3	protein_coding	1.29733	0.000583448
ENSMUSG00000041120,6	Nbl1	protein_coding	1.29732	0.0421648
ENSMUSG00000001248,10	Gramd1a	protein_coding	1.29728	0.00132322
ENSMUSG00000102494,1	RP23-416H10,8	sense_intronic	1.29722	0.0257366
ENSMUSG00000039850,12	Endov	protein_coding	1.29513	0.00372359
ENSMUSG00000011158,7	Brf1	protein_coding	1.29511	0.0250579
ENSMUSG00000024851,9	Pitpnm1	protein_coding	1.29501	0.000651581
ENSMUSG00000023938,7	Aars2	protein_coding	1.295	0.00743882
ENSMUSG00000020734,9	Grin2c	protein_coding	1.29475	0.0119147
ENSMUSG00000020241,9	Col6a2	protein_coding	1.29389	0.000693358
ENSMUSG00000004043,10	Stat5a	protein_coding	1.29376	0.00441123
ENSMUSG00000019054,9	Fis1	protein_coding	1.29335	0.0132055
ENSMUSG00000006575,10	Rundc3a	protein_coding	1.29271	0.0314757
ENSMUSG00000078908,5	Mon1b	protein_coding	1.29251	0.00636567
ENSMUSG00000078253,3	Krtap16-1	protein_coding	1.2925	0.026062
ENSMUSG00000033938,5	Ndufb7	protein_coding	1.29141	0.00335588
ENSMUSG00000034168,6	Irf2bpl	protein_coding	1.29112	0.0460095
ENSMUSG00000016528,6	Mapkapk2	protein_coding	1.29074	0.00348074
ENSMUSG00000053166,10	Cdh22	protein_coding	1.29051	0.00980319
ENSMUSG00000034793,11	G6pc3	protein_coding	1.29026	0.0313573
ENSMUSG00000020605,8	Hs1bp3	protein_coding	1.28876	0.0211053
ENSMUSG00000027322,7	Siglec1	protein_coding	1.28848	0.00249394
ENSMUSG00000053716,9	Dusp7	protein_coding	1.28845	0.0126227
ENSMUSG00000073102,3	Drc1	protein_coding	1.28776	0.0029756
ENSMUSG00000029603,11	Dtx1	protein_coding	1.28729	0.0143114
ENSMUSG00000067724,5	Gbx1	protein_coding	1.28665	0.0262395
ENSMUSG00000029050,11	Ski	protein_coding	1.28647	0.014788
ENSMUSG00000007021,4	Syngr3	protein_coding	1.28583	0.0490141
ENSMUSG00000033227,7	Wnt6	protein_coding	1.28555	0.0265054
ENSMUSG00000030352,10	Tspan9	protein_coding	1.28498	0.00640591
ENSMUSG00000070003,6	Ssbp4	protein_coding	1.28474	0.0413532
ENSMUSG00000002981,9	Clptm1	protein_coding	1.2846	0.0224684
ENSMUSG00000026817,10	Ak1	protein_coding	1.28421	0.0456192
ENSMUSG00000026223,11	Itm2c	protein_coding	1.28364	0.0140451
ENSMUSG00000030000,8	Add2	protein_coding	1.28352	0.0203307
ENSMUSG00000084856,1	Gm11528	lincRNA	1.2831	0.0186213
ENSMUSG00000031891,5	Hsd11b2	protein_coding	1.28302	0.0436882
ENSMUSG00000000148,13	Brat1	protein_coding	1.283	0.0014118
ENSMUSG00000038239,9	Hrc	protein_coding	1.28277	0.0128604
ENSMUSG00000058498,8	Rnf207	protein_coding	1.28271	0.00984799
ENSMUSG00000024968,9	Rcor2	protein_coding	1.28219	0.006849
ENSMUSG00000047492,4	Inhbe	protein_coding	1.28198	0.0334135
ENSMUSG00000033819,11	Ppp1r16a	protein_coding	1.28176	0.0352472
ENSMUSG00000043633,6	Fam221b	protein_coding	1.28089	0.0167358
ENSMUSG00000054150,7	Syne3	protein_coding	1.28041	0.0012387
ENSMUSG00000020701,8	Tmem132e	protein_coding	1.27964	0.0196065
ENSMUSG00000063239,12	Grm4	protein_coding	1.27874	0.00209994
ENSMUSG00000052934,9	Fbxo31	protein_coding	1.27845	0.00383506
ENSMUSG00000031865,11	Dctn1	protein_coding	1.27827	0.00057516
ENSMUSG00000058183,10	Mmel1	protein_coding	1.27812	0.0172918
ENSMUSG00000031957,5	Ctrb1	protein_coding	1.27806	0.0496957
ENSMUSG00000032783,8	Troap	protein_coding	1.27757	0.0302928
ENSMUSG00000050737,13	Ptges	protein_coding	1.27756	0.0363444
ENSMUSG00000002250,11	Ppard	protein_coding	1.27745	0.00951201
ENSMUSG00000038276,8	Asic3	protein_coding	1.27745	0.0494488
ENSMUSG00000038453,11	Srcin1	protein_coding	1.27744	0.000693358
ENSMUSG00000024942,12	Capn1	protein_coding	1.27728	0.00295821
ENSMUSG00000039262,12	Prrc2b	protein_coding	1.27703	0.00115864
ENSMUSG00000027612,7	Mmp24	protein_coding	1.27697	0.0142296
ENSMUSG00000025573,4	6030468B19Rik	protein_coding	1.27695	0.0193698
ENSMUSG00000024201,8	Kdm4b	protein_coding	1.27671	0.00148579
ENSMUSG00000028041,13	Adam15	protein_coding	1.27622	0.0288692
ENSMUSG00000022568,12	Scrib	protein_coding	1.27526	0.00146699
ENSMUSG00000008393,8	Carhsp1	protein_coding	1.275	0.0346268
ENSMUSG00000041168,9	Lonp1	protein_coding	1.27473	0.0441251
ENSMUSG00000030353,11	Tead4	protein_coding	1.27457	0.013238
ENSMUSG00000020444,15	Guk1	protein_coding	1.27444	0.0386875
ENSMUSG00000051427,10	Ccdc157	protein_coding	1.27401	0.00541453
ENSMUSG00000010021,9	Kif19a	protein_coding	1.27394	0.00377526
ENSMUSG00000039639,6	Kcne1	protein_coding	1.27373	0.0204994
ENSMUSG00000026857,5	Ntmt1	protein_coding	1.2737	0.0104038
ENSMUSG00000038295,10	Atg9b	protein_coding	1.27348	0.0117291
ENSMUSG00000071647,4	Eml3	protein_coding	1.27339	0.00135705
ENSMUSG00000002100,11	Mybpc3	protein_coding	1.27306	0.00305368
ENSMUSG00000025576,13	Rbfox3	protein_coding	1.27298	0.00196838
ENSMUSG00000025580,11	Eif4a3	protein_coding	1.27215	0.0197835
ENSMUSG00000031970,12	Dbndd1	protein_coding	1.27176	0.0308442
ENSMUSG00000028655,7	Mfsd2a	protein_coding	1.27087	0.0360969
ENSMUSG00000021298,7	Gpr132	protein_coding	1.27065	0.0355636
ENSMUSG00000073418,4	C4b	protein_coding	1.27043	0.00094434
ENSMUSG00000023067,9	Cdkn1a	protein_coding	1.27043	0.0368441
ENSMUSG00000023328,10	Ache	protein_coding	1.27018	0.00782534
ENSMUSG00000040751,8	Lat2	protein_coding	1.27015	0.0212832
ENSMUSG00000033576,7	Apol6	protein_coding	1.26956	0.0224849
ENSMUSG00000050022,12	Amz1	protein_coding	1.26932	0.00198037
ENSMUSG00000023809,9	Rps6ka2	protein_coding	1.26928	0.00769215
ENSMUSG00000039512,11	Uhrf1bp1	protein_coding	1.2688	0.00113655
ENSMUSG00000031837,9	Necab2	protein_coding	1.26848	0.0320204
ENSMUSG00000017132,13	Cyth1	protein_coding	1.26814	0.0050862
ENSMUSG00000017740,12	Slc12a5	protein_coding	1.26755	0.00197074
ENSMUSG00000034792,8	Gna15	protein_coding	1.26677	0.0159008
ENSMUSG00000040035,10	Disp2	protein_coding	1.26675	0.00124445
ENSMUSG00000012123,11	Aim1l	protein_coding	1.26663	0.0101979
ENSMUSG00000003233,7	Dvl3	protein_coding	1.26634	0.00932262
ENSMUSG00000079553,6	Kifc1	protein_coding	1.26571	0.0397078
ENSMUSG00000036002,8	Fam214b	protein_coding	1.26465	0.0336254
ENSMUSG00000038777,15	Sema6c	protein_coding	1.26445	0.00717592
ENSMUSG00000067629,6	Syngap1	protein_coding	1.26427	0.000665999
ENSMUSG00000017386,6	Traf4	protein_coding	1.26427	0.0224684
ENSMUSG00000004056,11	Akt2	protein_coding	1.26415	0.00824117
ENSMUSG00000028750,8	Pla2g2c	protein_coding	1.26408	0.0382055
ENSMUSG00000020085,11	Aifm2	protein_coding	1.26407	0.0151918
ENSMUSG00000002059,13	Rab34	protein_coding	1.26382	0.0229454
ENSMUSG00000003346,10	Abhd17a	protein_coding	1.26339	0.0218128
ENSMUSG00000057788,9	Ddx49	protein_coding	1.26326	0.0267651
ENSMUSG00000022518,11	4930562C15Rik	protein_coding	1.2629	0.00848453
ENSMUSG00000031833,9	Mast3	protein_coding	1.26237	0.0105416
ENSMUSG00000040842,13	Szrd1	protein_coding	1.26178	0.0338514
ENSMUSG00000039741,11	Bahcc1	protein_coding	1.26142	0.000464038
ENSMUSG00000052271,7	Bhlha15	protein_coding	1.26137	0.0285193
ENSMUSG00000029423,6	Piwil1	protein_coding	1.26117	0.00795561
ENSMUSG00000030341,13	Tnfrsf1a	protein_coding	1.26082	0.0246737
ENSMUSG00000032175,10	Tyk2	protein_coding	1.26047	0.00523533
ENSMUSG00000028959,10	Fastk	protein_coding	1.26042	0.0176648
ENSMUSG00000031842,9	Pde4c	protein_coding	1.2603	0.00324395
ENSMUSG00000006469,9	Slc34a3	protein_coding	1.26001	0.0496758
ENSMUSG00000026925,12	Inpp5e	protein_coding	1.25993	0.0461639
ENSMUSG00000032120,10	C2cd2l	protein_coding	1.25979	0.0245148
ENSMUSG00000038517,11	Tbkbp1	protein_coding	1.25958	0.0174275
ENSMUSG00000040249,11	Lrp1	protein_coding	1.25928	0.000690963
ENSMUSG00000000915,11	Hip1r	protein_coding	1.25906	0.0325187
ENSMUSG00000017713,9	Tha1	protein_coding	1.25891	0.0495177
ENSMUSG00000047284,10	Neurl4	protein_coding	1.25883	0.00391643
ENSMUSG00000037221,9	Mospd3	protein_coding	1.25839	0.0238997
ENSMUSG00000025575,10	Cant1	protein_coding	1.25772	0.0150703
ENSMUSG00000017969,9	Ptgis	protein_coding	1.25744	0.0345
ENSMUSG00000066640,7	Fbxl18	protein_coding	1.25686	0.000862377
ENSMUSG00000047415,7	Gpr68	protein_coding	1.25679	0.0366784
ENSMUSG00000097156,3	Gm3764	lincRNA	1.25631	0.00327948
ENSMUSG00000031808,6	Slc27a1	protein_coding	1.25589	0.0190849
ENSMUSG00000075296,4	Aldh3b2	protein_coding	1.25538	0.0297727
ENSMUSG00000046861,9	Hectd3	protein_coding	1.25504	0.0133714
ENSMUSG00000028622,7	Mrpl37	protein_coding	1.25499	0.0103307
ENSMUSG00000061742,7	Slc22a12	protein_coding	1.25439	0.0150342
ENSMUSG00000068263,7	Efcc1	protein_coding	1.25419	0.00601582
ENSMUSG00000055053,13	Nfic	protein_coding	1.25403	0.00315082
ENSMUSG00000063430,8	Wscd2	protein_coding	1.25278	0.000693358
ENSMUSG00000018486,2	Wnt9b	protein_coding	1.25246	0.00626938
ENSMUSG00000067367,5	Lyar	protein_coding	1.2524	0.0230923
ENSMUSG00000040964,12	Arhgef10l	protein_coding	1.25196	0.000792766
ENSMUSG00000043822,14	Adamtsl5	protein_coding	1.25174	0.00631213
ENSMUSG00000020431,5	Adcy1	protein_coding	1.25111	0.000392152
ENSMUSG00000057897,10	Camk2b	protein_coding	1.25106	0.00121569
ENSMUSG00000024130,11	Abca3	protein_coding	1.25088	0.00094518
ENSMUSG00000038204,9	Asb10	protein_coding	1.25036	0.00990074
ENSMUSG00000037306,9	Man1c1	protein_coding	1.24955	0.0273414
ENSMUSG00000022416,11	Cacna1i	protein_coding	1.24943	0.000269882
ENSMUSG00000031893,6	Tsnaxip1	protein_coding	1.24938	0.0214929
ENSMUSG00000071054,8	Safb	protein_coding	1.24895	0.00147681
ENSMUSG00000031545,5	Agpat6	protein_coding	1.24879	0.00329363
ENSMUSG00000024247,10	Pkdcc	protein_coding	1.24875	0.0413654
ENSMUSG00000057751,10	Megf6	protein_coding	1.24838	0.00114269
ENSMUSG00000053004,8	Hrh1	protein_coding	1.24832	0.0210816
ENSMUSG00000042240,10	Crybb2	protein_coding	1.24827	0.0249512
ENSMUSG00000022946,8	Dopey2	protein_coding	1.24802	0.00308592
ENSMUSG00000031807,6	Pgls	protein_coding	1.24786	0.0386536
ENSMUSG00000043323,12	Fbrsl1	protein_coding	1.24781	0.0111456
ENSMUSG00000024617,12	Camk2a	protein_coding	1.24763	0.00787709
ENSMUSG00000062115,11	Rai1	protein_coding	1.24748	0.0012387
ENSMUSG00000070802,5	Pnmal2	protein_coding	1.24717	0.0325553
ENSMUSG00000041852,10	Tcf20	protein_coding	1.24688	0.00808322
ENSMUSG00000003344,10	Btbd2	protein_coding	1.24626	0.009471
ENSMUSG00000062785,9	Kcnc3	protein_coding	1.24609	0.0217215
ENSMUSG00000072720,5	Myo18b	protein_coding	1.24606	0.000177662
ENSMUSG00000074793,6	Hspa12b	protein_coding	1.24551	0.0363783
ENSMUSG00000032119,4	Hinfp	protein_coding	1.2451	0.0282075
ENSMUSG00000048699,4	4732456N10Rik	protein_coding	1.2449	0.0152627
ENSMUSG00000063904,3	Dpp3	protein_coding	1.24481	0.0016483
ENSMUSG00000015120,11	Ube2i	protein_coding	1.24441	0.00773337
ENSMUSG00000024833,10	Pola2	protein_coding	1.24426	0.00250124
ENSMUSG00000028339,13	Col15a1	protein_coding	1.24425	0.00189891
ENSMUSG00000015846,10	Rxra	protein_coding	1.24419	0.0122981
ENSMUSG00000024962,9	Vegfb	protein_coding	1.2441	0.0391012
ENSMUSG00000005417,13	Mprip	protein_coding	1.2441	0.00356905
ENSMUSG00000020916,8	Krt36	protein_coding	1.24395	0.0482161
ENSMUSG00000000631,15	Myo18a	protein_coding	1.24376	0.000166429
ENSMUSG00000033065,9	Pfkm	protein_coding	1.24373	0.0129695
ENSMUSG00000016028,9	Celsr1	protein_coding	1.24225	0.00100878
ENSMUSG00000053334,5	Ficd	protein_coding	1.24141	0.0235568
ENSMUSG00000074923,6	Pak6	protein_coding	1.24119	0.0122827
ENSMUSG00000020592,10	Sdc1	protein_coding	1.24111	0.0132835
ENSMUSG00000020453,13	Patz1	protein_coding	1.24107	0.00621777
ENSMUSG00000042524,9	Sun2	protein_coding	1.24072	0.00969886
ENSMUSG00000026028,8	Trak2	protein_coding	1.24023	0.0221905
ENSMUSG00000037933,11	Bicd2	protein_coding	1.23995	0.00599067
ENSMUSG00000025171,1	Ubtd1	protein_coding	1.2394	0.0433031
ENSMUSG00000103015,1	RP23-127L4,1	TEC	1.23901	0.0249589
ENSMUSG00000032860,4	P2ry2	protein_coding	1.23829	0.0384133
ENSMUSG00000029478,12	Ncor2	protein_coding	1.23812	0.000761353
ENSMUSG00000071176,6	Arhgef10	protein_coding	1.23809	0.00143702
ENSMUSG00000055632,13	Hmcn2	protein_coding	1.23799	0.000520982
ENSMUSG00000015647,9	Lama5	protein_coding	1.2377	0.000651581
ENSMUSG00000037946,7	Fgd3	protein_coding	1.23743	0.00509422
ENSMUSG00000003402,9	Prkcsh	protein_coding	1.23742	0.0124277
ENSMUSG00000059323,9	Tonsl	protein_coding	1.23732	0.00592397
ENSMUSG00000026458,9	Ppfia4	protein_coding	1.23719	0.00147849
ENSMUSG00000020092,8	Pald1	protein_coding	1.23695	0.00764383
ENSMUSG00000054013,5	Tmem179	protein_coding	1.23631	0.042388
ENSMUSG00000026270,7	Capn10	protein_coding	1.23612	0.0261937
ENSMUSG00000060470,6	Gpr97	protein_coding	1.23581	0.00263524
ENSMUSG00000051790,11	Nlgn2	protein_coding	1.23559	0.0044723
ENSMUSG00000020901,9	Pik3r5	protein_coding	1.23494	0.000807922
ENSMUSG00000008129,10	4930432K21Rik	protein_coding	1.23449	0.0167573
ENSMUSG00000027936,14	Crtc2	protein_coding	1.23444	0.00733579
ENSMUSG00000022760,11	Thap7	protein_coding	1.23384	0.046494
ENSMUSG00000038763,11	Alpk3	protein_coding	1.23366	0.00519788
ENSMUSG00000036892,8	Prodh2	protein_coding	1.23362	0.0379905
ENSMUSG00000000530,12	Acvrl1	protein_coding	1.23307	0.0180824
ENSMUSG00000039148,4	Sart1	protein_coding	1.23305	0.00119734
ENSMUSG00000090673,1	Gm340	protein_coding	1.23301	0.00347253
ENSMUSG00000066357,6	Wdr6	protein_coding	1.23286	0.0292781
ENSMUSG00000097386,1	9130213A22Rik	protein_coding	1.2328	0.0453808
ENSMUSG00000044006,8	Cilp2	protein_coding	1.23279	0.0164692
ENSMUSG00000020520,10	Galnt10	protein_coding	1.23279	0.0220524
ENSMUSG00000099207,3	Gm10637	lincRNA	1.23254	0.0210186
ENSMUSG00000046731,4	Kctd11	protein_coding	1.23252	0.0457162
ENSMUSG00000024743,10	Syt7	protein_coding	1.23144	0.00263679
ENSMUSG00000025209,4	Peo1	protein_coding	1.23124	0.00116853
ENSMUSG00000066964,2	Tmem211	protein_coding	1.23072	0.0428826
ENSMUSG00000024208,11	Uqcc2	protein_coding	1.23051	0.049011
ENSMUSG00000028334,6	Nans	protein_coding	1.23049	0.0332297
ENSMUSG00000017664,12	Slc35c2	protein_coding	1.23026	0.0157631
ENSMUSG00000042216,9	Sgsm1	protein_coding	1.23016	0.000663863
ENSMUSG00000029771,8	Irf5	protein_coding	1.22957	0.0463932
ENSMUSG00000043257,11	Pigv	protein_coding	1.22901	0.027724
ENSMUSG00000075467,4	Dnlz	protein_coding	1.22791	0.0350426
ENSMUSG00000058740,10	Kcnt1	protein_coding	1.22754	0.0012779
ENSMUSG00000018707,9	Dync1h1	protein_coding	1.22753	0.000875206
ENSMUSG00000031932,10	Gpr83	protein_coding	1.2275	0.0112418
ENSMUSG00000022437,6	Samm50	protein_coding	1.22719	0.0487067
ENSMUSG00000025213,7	Kazald1	protein_coding	1.22708	0.0398013
ENSMUSG00000034201,9	Gas2l1	protein_coding	1.22699	0.00550657
ENSMUSG00000028641,12	Lepre1	protein_coding	1.22688	0.0403266
ENSMUSG00000010064,11	Slc38a3	protein_coding	1.22658	0.00295821
ENSMUSG00000026820,5	Ptges2	protein_coding	1.22642	0.0266457
ENSMUSG00000041117,8	Ccdc8	protein_coding	1.22626	0.0246281
ENSMUSG00000020099,7	Unc5b	protein_coding	1.22407	0.00187725
ENSMUSG00000019823,13	Mical1	protein_coding	1.22376	0.00377526
ENSMUSG00000057219,7	Armc7	protein_coding	1.22362	0.0393589
ENSMUSG00000024831,9	Ighmbp2	protein_coding	1.22359	0.0069873
ENSMUSG00000032500,9	Dclk3	protein_coding	1.22356	0.0126347
ENSMUSG00000026751,10	Nr5a1	protein_coding	1.2225	0.0316938
ENSMUSG00000037126,11	Psd	protein_coding	1.22233	0.00141091
ENSMUSG00000025577,7	Cbx2	protein_coding	1.22224	0.0280128
ENSMUSG00000024301,9	Kifc5b	protein_coding	1.22145	0.0418202
ENSMUSG00000039886,4	Tmem120a	protein_coding	1.22115	0.0461886
ENSMUSG00000008604,7	Ubqln4	protein_coding	1.22071	0.00975147
ENSMUSG00000032562,9	Gnai2	protein_coding	1.22056	0.00643024
ENSMUSG00000035722,11	Abca7	protein_coding	1.21985	0.00189711
ENSMUSG00000025728,10	Pigq	protein_coding	1.21963	0.0157422
ENSMUSG00000055602,12	Tcp10b	protein_coding	1.21863	0.0246867
ENSMUSG00000053693,12	Mast1	protein_coding	1.21796	0.00189891
ENSMUSG00000058153,10	Sez6l	protein_coding	1.21716	0.00141371
ENSMUSG00000025507,9	Pidd1	protein_coding	1.21707	0.0295642
ENSMUSG00000032292,4	Nr2e3	protein_coding	1.2169	0.0399202
ENSMUSG00000033033,6	Calhm2	protein_coding	1.2165	0.00708051
ENSMUSG00000037686,5	Aspg	protein_coding	1.21631	0.0282081
ENSMUSG00000033902,11	Mapkbp1	protein_coding	1.21624	0.00263524
ENSMUSG00000024991,7	Eif3a	protein_coding	1.21585	0.0336299
ENSMUSG00000026547,11	Tagln2	protein_coding	1.215	0.0209364
ENSMUSG00000004263,11	Atn1	protein_coding	1.2147	0.0061883
ENSMUSG00000086899,3	1600002D24Rik	lincRNA	1.21467	0.0320883
ENSMUSG00000057469,7	E2f6	protein_coding	1.21443	0.0349138
ENSMUSG00000040310,8	Alx4	protein_coding	1.21421	0.00636018
ENSMUSG00000030796,11	Tead2	protein_coding	1.21381	0.033794
ENSMUSG00000074063,5	Osgin1	protein_coding	1.21379	0.0342805
ENSMUSG00000020776,14	Fbf1	protein_coding	1.21373	0.00139344
ENSMUSG00000056917,8	Sipa1	protein_coding	1.21357	0.00322199
ENSMUSG00000066191,7	Anks6	protein_coding	1.21335	0.0218184
ENSMUSG00000034189,4	Hsdl1	protein_coding	1.21332	0.0069971
ENSMUSG00000004937,5	Sgta	protein_coding	1.21301	0.0379167
ENSMUSG00000037139,11	Myom3	protein_coding	1.21257	0.00128043
ENSMUSG00000063146,7	Clip2	protein_coding	1.21244	0.00132172
ENSMUSG00000034271,11	Jdp2	protein_coding	1.21229	0.0388123
ENSMUSG00000040220,9	Gas8	protein_coding	1.21178	0.00556783
ENSMUSG00000041164,11	Zmiz2	protein_coding	1.21104	0.00547574
ENSMUSG00000032812,12	Arap1	protein_coding	1.21101	0.0016483
ENSMUSG00000067586,3	S1pr3	protein_coding	1.21092	0.0321991
ENSMUSG00000014498,5	Ankrd52	protein_coding	1.21033	0.00122224
ENSMUSG00000027376,11	Prom2	protein_coding	1.21027	0.012208
ENSMUSG00000027470,9	Mylk2	protein_coding	1.21019	0.0300592
ENSMUSG00000016624,11	Phf21b	protein_coding	1.20962	0.0169751
ENSMUSG00000018634,10	Crhr1	protein_coding	1.20951	0.0287904
ENSMUSG00000034595,13	Ppp1r18	protein_coding	1.20944	0.00224771
ENSMUSG00000005103,9	Wdr1	protein_coding	1.20942	0.0127045
ENSMUSG00000045817,8	Zfp36l2	protein_coding	1.20938	0.0230923
ENSMUSG00000035969,11	Rusc2	protein_coding	1.20936	0.00765167
ENSMUSG00000051054,3	1700014D04Rik	protein_coding	1.20917	0.0494953
ENSMUSG00000059810,14	Rgs3	protein_coding	1.20904	0.000570665
ENSMUSG00000033220,6	Rac2	protein_coding	1.20886	0.0489747
ENSMUSG00000026202,9	Tuba4a	protein_coding	1.20878	0.016126
ENSMUSG00000036862,10	Dchs1	protein_coding	1.20869	0.00425667
ENSMUSG00000044197,8	Gpr146	protein_coding	1.20863	0.0235364
ENSMUSG00000027077,7	Smtnl1	protein_coding	1.2083	0.047805
ENSMUSG00000032875,7	Arhgef17	protein_coding	1.20813	0.00250667
ENSMUSG00000056493,8	Foxk1	protein_coding	1.20787	0.0032344
ENSMUSG00000022427,3	Tomm22	protein_coding	1.20778	0.00891211
ENSMUSG00000039994,11	Timeless	protein_coding	1.20753	0.000646744
ENSMUSG00000075555,7	Gm10863	antisense	1.20741	0.0350954
ENSMUSG00000000693,6	Loxl3	protein_coding	1.20736	0.0199389
ENSMUSG00000045639,10	Zfp629	protein_coding	1.20678	0.0298897
ENSMUSG00000069565,8	Dazap1	protein_coding	1.20604	0.0390174
ENSMUSG00000038400,11	Pmepa1	protein_coding	1.20584	0.0162636
ENSMUSG00000104415,1	RP23-67I3,5	TEC	1.20582	0.0311233
ENSMUSG00000025461,10	Cd163l1	protein_coding	1.20558	0.0345305
ENSMUSG00000034845,5	Plvap	protein_coding	1.20524	0.0172264
ENSMUSG00000040938,12	Slc16a11	protein_coding	1.20475	0.0431222
ENSMUSG00000038020,5	Rapgefl1	protein_coding	1.2046	0.00951425
ENSMUSG00000034212,9	Ankmy1	protein_coding	1.20448	0.0199389
ENSMUSG00000064125,10	BC068157	protein_coding	1.20445	0.00423545
ENSMUSG00000042918,11	Mamstr	protein_coding	1.20443	0.0278408
ENSMUSG00000023259,12	Slc26a6	protein_coding	1.20381	0.00425538
ENSMUSG00000030269,10	Mtmr14	protein_coding	1.20349	0.00794938
ENSMUSG00000028063,11	Lmna	protein_coding	1.20342	0.00653511
ENSMUSG00000038738,11	Shank1	protein_coding	1.20311	0.00303078
ENSMUSG00000026825,13	Dnm1	protein_coding	1.20254	0.0085757
ENSMUSG00000023353,9	Agap3	protein_coding	1.20236	0.0101212
ENSMUSG00000028967,6	Errfi1	protein_coding	1.20234	0.0280582
ENSMUSG00000000378,11	Ccm2	protein_coding	1.20203	0.0275127
ENSMUSG00000058833,7	2810428I15Rik	protein_coding	1.20193	0.00795561
ENSMUSG00000024164,11	C3	protein_coding	1.20191	0.00117015
ENSMUSG00000028475,8	5430416O09Rik	lincRNA	1.20112	0.0259392
ENSMUSG00000022390,10	Zc3h7b	protein_coding	1.20104	0.0223929
ENSMUSG00000040935,8	Padi6	protein_coding	1.20076	0.0496758
ENSMUSG00000035545,9	Leng8	protein_coding	1.2003	0.0280104
ENSMUSG00000039244,6	E130309D02Rik	protein_coding	1.20029	0.016881
ENSMUSG00000024101,10	Wash	protein_coding	1.19918	0.0291091
ENSMUSG00000022594,10	Lynx1	protein_coding	1.19897	0.0288948
ENSMUSG00000034312,9	Iqsec1	protein_coding	1.19844	0.00263524
ENSMUSG00000024948,10	Map4k2	protein_coding	1.19835	0.000516547
ENSMUSG00000009900,7	Wnt3a	protein_coding	1.19831	0.0332679
ENSMUSG00000022433,14	Csnk1e	protein_coding	1.19789	0.0107453
ENSMUSG00000030530,11	Furin	protein_coding	1.19746	0.00445464
ENSMUSG00000024170,11	Telo2	protein_coding	1.19693	0.00274387
ENSMUSG00000041733,6	Coq5	protein_coding	1.19685	0.039244
ENSMUSG00000040829,10	Zmynd15	protein_coding	1.19661	0.0178983
ENSMUSG00000033728,10	Lrrc14	protein_coding	1.1966	0.0478611
ENSMUSG00000000532,10	Acvr1b	protein_coding	1.19653	0.0379905
ENSMUSG00000000374,7	Trappc10	protein_coding	1.19542	0.00315051
ENSMUSG00000024773,10	Atg2a	protein_coding	1.1946	0.000272535
ENSMUSG00000034382,10	AI661453	protein_coding	1.19444	0.0140748
ENSMUSG00000017652,12	Cd40	protein_coding	1.19401	0.0174529
ENSMUSG00000009739,12	Pou6f1	protein_coding	1.19399	0.00990304
ENSMUSG00000038524,9	Fchsd1	protein_coding	1.19369	0.0296438
ENSMUSG00000008690,11	Ncaph2	protein_coding	1.19344	0.0227316
ENSMUSG00000001755,8	Coasy	protein_coding	1.19292	0.0196103
ENSMUSG00000052087,9	Rgs14	protein_coding	1.19241	0.0435424
ENSMUSG00000015451,12	C4a	processed_transcript	1.19235	0.00166872
ENSMUSG00000034659,10	Tmem109	protein_coding	1.19216	0.00705427
ENSMUSG00000015133,12	Lrrk1	protein_coding	1.19202	0.00328325
ENSMUSG00000029071,12	Dvl1	protein_coding	1.19187	0.0299617
ENSMUSG00000070298,5	Trcg1	protein_coding	1.19163	0.0335838
ENSMUSG00000084989,3	E030010N08Rik	protein_coding	1.19145	0.00295821
ENSMUSG00000041544,11	Ptchd2	protein_coding	1.19108	0.010115
ENSMUSG00000056952,9	Tatdn2	protein_coding	1.19107	0.0207742
ENSMUSG00000002550,12	Uck1	protein_coding	1.19096	0.0468495
ENSMUSG00000034758,8	Tle6	protein_coding	1.19065	0.0228087
ENSMUSG00000020866,13	Cacna1g	protein_coding	1.19064	0.00356205
ENSMUSG00000051339,8	2900026A02Rik	protein_coding	1.18946	0.00364044
ENSMUSG00000043088,12	Il17re	protein_coding	1.18925	0.0447048
ENSMUSG00000013858,10	Tmem259	protein_coding	1.18892	0.0411711
ENSMUSG00000063765,7	Chadl	protein_coding	1.1889	0.0415034
ENSMUSG00000036636,5	Clcn7	protein_coding	1.18868	0.00230025
ENSMUSG00000020474,7	Polm	protein_coding	1.18868	0.0227316
ENSMUSG00000034416,14	Pkd1l2	protein_coding	1.18852	0.000841228
ENSMUSG00000006024,8	Napa	protein_coding	1.18844	0.0398551
ENSMUSG00000020798,10	Spns3	protein_coding	1.18826	0.0120371
ENSMUSG00000074473,1	A230072I06Rik	protein_coding	1.18822	0.0177228
ENSMUSG00000038756,9	Ttll6	protein_coding	1.18807	0.0208688
ENSMUSG00000020430,8	Pes1	protein_coding	1.18778	0.0104038
ENSMUSG00000001482,10	Def8	protein_coding	1.18754	0.00769131
ENSMUSG00000100987,1	Gm1627	lincRNA	1.18695	0.0289596
ENSMUSG00000020100,11	Slc29a3	protein_coding	1.18686	0.00321356
ENSMUSG00000020802,8	Ube2o	protein_coding	1.18686	0.0069971
ENSMUSG00000025650,8	Col7a1	protein_coding	1.18583	0.00102875
ENSMUSG00000033697,11	Arhgap39	protein_coding	1.18572	0.0148956
ENSMUSG00000046312,4	AI464131	protein_coding	1.18395	0.0393646
ENSMUSG00000005374,9	Tbl2	protein_coding	1.18386	0.00414772
ENSMUSG00000026923,11	Notch1	protein_coding	1.1838	0.00104985
ENSMUSG00000045302,9	Preb	protein_coding	1.18371	0.0119436
ENSMUSG00000062312,5	Erbb2	protein_coding	1.18306	0.00526646
ENSMUSG00000003360,10	Ddx23	protein_coding	1.18267	0.00501525
ENSMUSG00000022439,5	Parvg	protein_coding	1.1824	0.0346268
ENSMUSG00000021288,14	Klc1	protein_coding	1.1824	0.00536513
ENSMUSG00000024660,8	Incenp	protein_coding	1.18236	0.00141371
ENSMUSG00000035165,9	Kcne3	protein_coding	1.18212	0.0233663
ENSMUSG00000003527,8	Dgcr14	protein_coding	1.1821	0.0219587
ENSMUSG00000009487,9	Otog	protein_coding	1.18205	0.00142021
ENSMUSG00000033016,11	Nfatc1	protein_coding	1.18196	0.0303173
ENSMUSG00000028931,7	Kcnab2	protein_coding	1.18158	0.0115842
ENSMUSG00000025231,12	Sufu	protein_coding	1.18059	0.00340861
ENSMUSG00000033327,12	Tnxb	protein_coding	1.18023	0.0004488
ENSMUSG00000033256,10	Shf	protein_coding	1.17978	0.024922
ENSMUSG00000028744,11	Pqlc2	protein_coding	1.17951	0.0182363
ENSMUSG00000039457,3	Ppl	protein_coding	1.17889	0.00315051
ENSMUSG00000009772,11	Nuak2	protein_coding	1.17882	0.0179306
ENSMUSG00000020811,12	Wscd1	protein_coding	1.17871	0.0179994
ENSMUSG00000023191,5	Leprel2	protein_coding	1.17842	0.0175179
ENSMUSG00000024736,10	Tmem132a	protein_coding	1.17773	0.0191128
ENSMUSG00000002105,11	Slc39a13	protein_coding	1.17771	0.0120371
ENSMUSG00000034675,13	Dbn1	protein_coding	1.17732	0.00597302
ENSMUSG00000014470,4	Rnf166	protein_coding	1.17697	0.0264007
ENSMUSG00000020153,10	Ndufs7	protein_coding	1.17661	0.0207041
ENSMUSG00000061374,9	Fiz1	protein_coding	1.17622	0.0483498
ENSMUSG00000037993,7	Dhx38	protein_coding	1.17546	0.000843032
ENSMUSG00000040557,10	Wbscr27	protein_coding	1.17536	0.0204778
ENSMUSG00000102018,2	K230010J24Rik	protein_coding	1.17528	0.0421553
ENSMUSG00000047986,8	Palm3	protein_coding	1.17528	0.00334165
ENSMUSG00000005481,13	Ddx39	protein_coding	1.17514	0.0136841
ENSMUSG00000041642,14	Kif21b	protein_coding	1.17471	0.00120298
ENSMUSG00000003033,10	Ap1m1	protein_coding	1.17453	0.00543301
ENSMUSG00000029860,12	Zyx	protein_coding	1.17375	0.0128439
ENSMUSG00000028753,8	Vwa5b1	protein_coding	1.17356	0.00357028
ENSMUSG00000027624,13	Epb4,1l1	protein_coding	1.17345	0.000658258
ENSMUSG00000038780,10	Smurf1	protein_coding	1.17302	0.0098928
ENSMUSG00000030351,4	Tspan11	protein_coding	1.17272	0.0210186
ENSMUSG00000020455,12	Trim11	protein_coding	1.17209	0.0252094
ENSMUSG00000029196,9	Tada2b	protein_coding	1.17166	0.0210083
ENSMUSG00000021978,8	Extl3	protein_coding	1.1709	0.0229536
ENSMUSG00000097160,1	A630072L19Rik	lincRNA	1.17078	0.016134
ENSMUSG00000031861,11	Lpar2	protein_coding	1.17071	0.0166344
ENSMUSG00000025867,8	Cplx2	protein_coding	1.17069	0.0223116
ENSMUSG00000044017,12	Gpr133	protein_coding	1.17061	0.00115864
ENSMUSG00000035547,10	Capn5	protein_coding	1.17038	0.0109902
ENSMUSG00000041654,11	Slc39a11	protein_coding	1.1697	0.0212832
ENSMUSG00000022999,10	Lmbr1l	protein_coding	1.1696	0.0159075
ENSMUSG00000026854,12	Usp20	protein_coding	1.16956	0.00205239
ENSMUSG00000031955,9	Bcar1	protein_coding	1.1687	0.0374034
ENSMUSG00000039849,5	Pcif1	protein_coding	1.16857	0.0183925
ENSMUSG00000028737,11	Aldh4a1	protein_coding	1.16796	0.0476749
ENSMUSG00000014748,9	Tex261	protein_coding	1.16751	0.0282075
ENSMUSG00000019295,7	Tmem129	protein_coding	1.16731	0.0382392
ENSMUSG00000032724,5	Abtb2	protein_coding	1.16649	0.0114527
ENSMUSG00000031835,11	Mbtps1	protein_coding	1.16635	0.000734052
ENSMUSG00000004415,11	Col26a1	protein_coding	1.16502	0.00639069
ENSMUSG00000004264,13	Phb2	protein_coding	1.16465	0.0446949
ENSMUSG00000020447,5	Npc1l1	protein_coding	1.16442	0.0131179
ENSMUSG00000025223,10	Ldb1	protein_coding	1.16442	0.00473502
ENSMUSG00000016179,7	Camk1g	protein_coding	1.16376	0.0222703
ENSMUSG00000010825,13	Grid2ip	protein_coding	1.16364	0.0048054
ENSMUSG00000020451,13	Limk2	protein_coding	1.16275	0.00148826
ENSMUSG00000010660,2	Plcd1	protein_coding	1.16267	0.0196867
ENSMUSG00000002372,8	Ranbp3	protein_coding	1.16252	0.0449094
ENSMUSG00000031862,10	Atp13a1	protein_coding	1.16235	0.00878277
ENSMUSG00000041037,7	Irgq	protein_coding	1.16142	0.0241328
ENSMUSG00000070000,9	Fcho1	protein_coding	1.16034	0.00709746
ENSMUSG00000037446,9	Tulp1	protein_coding	1.15996	0.0115936
ENSMUSG00000071068,6	Treml2	protein_coding	1.15952	0.00935744
ENSMUSG00000024799,10	Tm7sf2	protein_coding	1.15943	0.0158753
ENSMUSG00000037519,12	Ppfia1	protein_coding	1.15859	0.00146699
ENSMUSG00000023243,8	Kcnk5	protein_coding	1.15857	0.0349766
ENSMUSG00000043017,9	Ptgir	protein_coding	1.15827	0.0499886
ENSMUSG00000033880,7	Lgals3bp	protein_coding	1.15817	0.0352174
ENSMUSG00000020473,9	Aebp1	protein_coding	1.15809	0.0154597
ENSMUSG00000017167,6	Cntnap1	protein_coding	1.15795	0.00823955
ENSMUSG00000058013,8	Sept11	protein_coding	1.15731	0.00445464
ENSMUSG00000046574,7	Prr12	protein_coding	1.15708	0.00804981
ENSMUSG00000024835,10	Coro1b	protein_coding	1.15702	0.0212171
ENSMUSG00000029703,6	Lrwd1	protein_coding	1.15685	0.00170201
ENSMUSG00000023018,4	Smarcd1	protein_coding	1.15619	0.0349138
ENSMUSG00000013033,12	Lphn1	protein_coding	1.15605	0.00140651
ENSMUSG00000037224,11	Zfyve28	protein_coding	1.15605	0.00602884
ENSMUSG00000039294,10	BC017643	protein_coding	1.15584	0.0247518
ENSMUSG00000027577,10	Chrna4	protein_coding	1.15526	0.0139687
ENSMUSG00000075028,7	Prdm11	protein_coding	1.155	0.00383498
ENSMUSG00000040836,11	Gpr161	protein_coding	1.15497	0.0100888
ENSMUSG00000026211,13	Obsl1	protein_coding	1.1543	0.0110065
ENSMUSG00000036057,7	Ptpn23	protein_coding	1.15413	0.00608307
ENSMUSG00000008318,5	Relt	protein_coding	1.15405	0.0262118
ENSMUSG00000044433,11	Camsap3	protein_coding	1.15399	0.00717592
ENSMUSG00000016510,7	Mtif3	protein_coding	1.15394	0.0162528
ENSMUSG00000074657,4	Kif5a	protein_coding	1.15379	0.00197074
ENSMUSG00000036820,7	Amdhd2	protein_coding	1.15288	0.0235451
ENSMUSG00000024885,8	Aldh3b1	protein_coding	1.15256	0.0313947
ENSMUSG00000047123,8	Ticam1	protein_coding	1.15255	0.0306824
ENSMUSG00000034412,9	Tbc1d10a	protein_coding	1.15255	0.0373541
ENSMUSG00000032596,10	Uba7	protein_coding	1.15254	0.00984799
ENSMUSG00000039108,10	Lsm14b	protein_coding	1.15188	0.0466622
ENSMUSG00000021277,12	Traf3	protein_coding	1.15165	0.00484657
ENSMUSG00000074102,4	Rbm15b	protein_coding	1.15145	0.0285578
ENSMUSG00000026167,10	Wnt10a	protein_coding	1.15122	0.0263971
ENSMUSG00000041025,11	Iffo2	protein_coding	1.15108	0.0170639
ENSMUSG00000020823,12	Sec14l1	protein_coding	1.15107	0.00389491
ENSMUSG00000016520,7	Lnx2	protein_coding	1.15089	0.0273414
ENSMUSG00000037263,9	1700055N04Rik	protein_coding	1.15088	0.00543024
ENSMUSG00000025407,6	Gli1	protein_coding	1.15074	0.0196609
ENSMUSG00000029578,11	Wipi2	protein_coding	1.15053	0.00308592
ENSMUSG00000021567,10	Nkd2	protein_coding	1.15043	0.0455347
ENSMUSG00000027217,9	Tspan18	protein_coding	1.14965	0.00312827
ENSMUSG00000024011,12	Pi16	protein_coding	1.14959	0.0368125
ENSMUSG00000025533,11	Asl	protein_coding	1.14928	0.0169298
ENSMUSG00000032128,10	Robo3	protein_coding	1.14915	0.0029707
ENSMUSG00000018001,14	Cyth3	protein_coding	1.14912	0.0140327
ENSMUSG00000061028,6	Clasrp	protein_coding	1.14902	0.0318808
ENSMUSG00000022619,5	Mapk8ip2	protein_coding	1.14796	0.0181301
ENSMUSG00000028059,10	Arhgef2	protein_coding	1.14793	0.0037953
ENSMUSG00000024212,8	Mllt1	protein_coding	1.14772	0.010115
ENSMUSG00000019261,2	Map1s	protein_coding	1.14721	0.0409173
ENSMUSG00000048070,4	Pirt	protein_coding	1.14715	0.0469552
ENSMUSG00000006299,9	Aamp	protein_coding	1.14689	0.0298321
ENSMUSG00000038670,9	Mybpc2	protein_coding	1.14687	0.00899504
ENSMUSG00000004952,9	Rasa4	protein_coding	1.14645	0.00537548
ENSMUSG00000020387,11	Jade2	protein_coding	1.14605	0.000671899
ENSMUSG00000029345,9	Tfip11	protein_coding	1.14605	0.031714
ENSMUSG00000066621,8	Tecpr1	protein_coding	1.14592	0.00159899
ENSMUSG00000082305,1	Gm2420	unprocessed_pseudogene	1.14572	0.00941333
ENSMUSG00000044700,11	Tmem201	protein_coding	1.14531	0.00292016
ENSMUSG00000032714,6	Syde1	protein_coding	1.14529	0.0328241
ENSMUSG00000003546,9	Klc4	protein_coding	1.14497	0.0359145
ENSMUSG00000029576,13	Radil	protein_coding	1.14497	0.0148956
ENSMUSG00000024965,8	Fermt3	protein_coding	1.14462	0.0288379
ENSMUSG00000031831,6	Dnaaf1	protein_coding	1.14431	0.019602
ENSMUSG00000042429,8	Adora1	protein_coding	1.14361	0.0382392
ENSMUSG00000025316,12	Banp	protein_coding	1.14361	0.00267982
ENSMUSG00000041638,14	Gcn1l1	protein_coding	1.14352	0.000498721
ENSMUSG00000040543,12	Pitpnm3	protein_coding	1.14314	0.00164295
ENSMUSG00000051413,13	Plagl2	protein_coding	1.14308	0.0406549
ENSMUSG00000058586,7	Serhl	protein_coding	1.14207	0.00476068
ENSMUSG00000051391,8	Ywhag	protein_coding	1.14206	0.00545146
ENSMUSG00000024777,9	Ppp2r5b	protein_coding	1.14196	0.0194187
ENSMUSG00000002984,12	Tomm40	protein_coding	1.14132	0.0245142
ENSMUSG00000037692,10	Ahdc1	protein_coding	1.14128	0.00982854
ENSMUSG00000032840,7	2410131K14Rik	protein_coding	1.14125	0.0290856
ENSMUSG00000023967,5	Mrps18a	protein_coding	1.14107	0.0266974
ENSMUSG00000061462,11	Obscn	protein_coding	1.14004	0.00444677
ENSMUSG00000037656,8	Slc20a2	protein_coding	1.13959	0.0223929
ENSMUSG00000025188,11	Hps1	protein_coding	1.13958	0.00198037
ENSMUSG00000025410,9	Dctn2	protein_coding	1.13936	0.0230923
ENSMUSG00000007030,4	Vwa7	protein_coding	1.13872	0.0106867
ENSMUSG00000024670,12	Cd6	protein_coding	1.13845	0.0119086
ENSMUSG00000045980,9	Tmem104	protein_coding	1.13766	0.0116821
ENSMUSG00000039661,10	Dusp26	protein_coding	1.1374	0.0381993
ENSMUSG00000038644,10	Pold1	protein_coding	1.13674	0.00567994
ENSMUSG00000006392,12	Med8	protein_coding	1.13642	0.0403497
ENSMUSG00000036661,9	Dennd3	protein_coding	1.13639	0.00582969
ENSMUSG00000022412,8	Mief1	protein_coding	1.13638	0.0355943
ENSMUSG00000033059,7	Pygb	protein_coding	1.13614	0.00629664
ENSMUSG00000037523,9	Mavs	protein_coding	1.13599	0.0432447
ENSMUSG00000013833,11	Med16	protein_coding	1.13579	0.0141913
ENSMUSG00000015599,8	Ttbk1	protein_coding	1.13552	0.00239944
ENSMUSG00000040327,12	Cul9	protein_coding	1.13546	0.00195947
ENSMUSG00000029026,12	Trp73	protein_coding	1.13514	0.034323
ENSMUSG00000019487,10	Trip10	protein_coding	1.13503	0.0220286
ENSMUSG00000042726,10	Trafd1	protein_coding	1.1349	0.0313857
ENSMUSG00000015149,9	Sirt2	protein_coding	1.13471	0.0308904
ENSMUSG00000012114,12	Med15	protein_coding	1.13385	0.0257366
ENSMUSG00000012819,11	Cdh23	protein_coding	1.1337	0.0063635
ENSMUSG00000031486,10	Gpr124	protein_coding	1.13369	0.00625324
ENSMUSG00000024818,10	Slc25a45	protein_coding	1.13343	0.0314896
ENSMUSG00000042608,11	Stk40	protein_coding	1.1334	0.0177572
ENSMUSG00000026121,9	Sema4c	protein_coding	1.13335	0.0220482
ENSMUSG00000032109,10	Nlrx1	protein_coding	1.13333	0.0484027
ENSMUSG00000028465,12	Tln1	protein_coding	1.13251	0.00139107
ENSMUSG00000034570,8	Inpp5j	protein_coding	1.13202	0.0247518
ENSMUSG00000020284,12	1810043G02Rik	protein_coding	1.13116	0.00560409
ENSMUSG00000032754,10	Slc8b1	protein_coding	1.13107	0.0148318
ENSMUSG00000020661,11	Dnmt3a	protein_coding	1.13086	0.000464038
ENSMUSG00000020101,10	4632428N05Rik	protein_coding	1.13069	0.0323773
ENSMUSG00000061718,8	Ppp1r1b	protein_coding	1.13057	0.0489422
ENSMUSG00000013338,12	Fer1l4	protein_coding	1.13001	0.00267982
ENSMUSG00000024987,5	Cyp26a1	protein_coding	1.12874	0.0382338
ENSMUSG00000036352,12	Ubac1	protein_coding	1.12733	0.0472533
ENSMUSG00000021061,11	Sptb	protein_coding	1.12725	0.00155319
ENSMUSG00000001053,11	N4bp3	protein_coding	1.12707	0.0323739
ENSMUSG00000066952,7	Myo1h	protein_coding	1.12706	0.00411603
ENSMUSG00000025227,10	Tmem180	protein_coding	1.12678	0.021977
ENSMUSG00000031823,9	Zdhhc7	protein_coding	1.12642	0.0417637
ENSMUSG00000049287,5	Iba57	protein_coding	1.12638	0.0282365
ENSMUSG00000035179,3	Ppp1r32	protein_coding	1.12629	0.0309886
ENSMUSG00000020747,13	2310067B10Rik	protein_coding	1.12614	0.00342809
ENSMUSG00000001525,10	Tubb5	protein_coding	1.12559	0.0207596
ENSMUSG00000010067,9	Rassf1	protein_coding	1.12547	0.0359127
ENSMUSG00000101605,1	Ace3	protein_coding	1.12522	0.0375365
ENSMUSG00000003341,8	Atp8b3	protein_coding	1.1251	0.0152398
ENSMUSG00000024870,5	Rab1b	protein_coding	1.12496	0.0401969
ENSMUSG00000021565,12	Slc6a19	protein_coding	1.1243	0.0271751
ENSMUSG00000040699,9	Limd2	protein_coding	1.12404	0.0449739
ENSMUSG00000001062,13	Vps9d1	protein_coding	1.12362	0.00923771
ENSMUSG00000071713,4	Csf2rb	protein_coding	1.12309	0.0487975
ENSMUSG00000028064,13	Sema4a	protein_coding	1.12293	0.0247039
ENSMUSG00000026452,11	Syt2	protein_coding	1.12279	0.00247248
ENSMUSG00000025574,9	Tk1	protein_coding	1.12277	0.00968125
ENSMUSG00000018040,5	Rrp7a	protein_coding	1.12269	0.0456289
ENSMUSG00000031075,13	Ano1	protein_coding	1.12266	0.00768495
ENSMUSG00000011877,9	Git1	protein_coding	1.12224	0.021654
ENSMUSG00000042632,12	Pla2g6	protein_coding	1.12213	0.00103425
ENSMUSG00000048240,10	Gng7	protein_coding	1.12163	0.0289399
ENSMUSG00000018167,6	Stard3	protein_coding	1.12099	0.0306824
ENSMUSG00000032579,10	Hemk1	protein_coding	1.12096	0.0413654
ENSMUSG00000066438,6	Plekhd1	protein_coding	1.12067	0.0454665
ENSMUSG00000014859,8	E2f4	protein_coding	1.12064	0.0184707
ENSMUSG00000038542,10	Pcid2	protein_coding	1.11946	0.0194789
ENSMUSG00000006276,9	Eps15l1	protein_coding	1.11945	0.00974915
ENSMUSG00000006411,8	Pvrl4	protein_coding	1.11913	0.0428826
ENSMUSG00000029482,3	Aacs	protein_coding	1.1189	0.0140549
ENSMUSG00000006342,10	Susd2	protein_coding	1.11855	0.0363485
ENSMUSG00000035403,8	Crb2	protein_coding	1.11828	0.00868774
ENSMUSG00000005566,9	Trim28	protein_coding	1.11812	0.0307908
ENSMUSG00000022421,14	Nptxr	protein_coding	1.1181	0.0323538
ENSMUSG00000070337,4	Gpr179	protein_coding	1.11807	0.00119888
ENSMUSG00000025792,5	Slc25a10	protein_coding	1.11802	0.0224484
ENSMUSG00000036529,13	Sbf1	protein_coding	1.11763	0.00545393
ENSMUSG00000039041,11	Adrm1	protein_coding	1.1175	0.0379829
ENSMUSG00000034390,11	Cmip	protein_coding	1.11676	0.00730932
ENSMUSG00000079243,2	Xirp1	protein_coding	1.11672	0.0360529
ENSMUSG00000005973,6	Rcn1	protein_coding	1.11662	0.0461083
ENSMUSG00000030310,8	Slc6a1	protein_coding	1.1164	0.042954
ENSMUSG00000032590,10	Apeh	protein_coding	1.1158	0.0071941
ENSMUSG00000043079,13	Synpo	protein_coding	1.11551	0.00635962
ENSMUSG00000017721,11	Pigt	protein_coding	1.11534	0.0375019
ENSMUSG00000002210,7	Smg9	protein_coding	1.11531	0.0115524
ENSMUSG00000028071,8	Sh2d2a	protein_coding	1.11517	0.0368552
ENSMUSG00000031453,11	Rasa3	protein_coding	1.11461	0.00275611
ENSMUSG00000002781,13	Tmem143	protein_coding	1.11456	0.0230923
ENSMUSG00000042873,10	Lhfpl4	protein_coding	1.11452	0.0430946
ENSMUSG00000034908,11	Sidt2	protein_coding	1.11428	0.0071517
ENSMUSG00000052557,7	Gan	protein_coding	1.11366	0.00920815
ENSMUSG00000017221,10	Psmd3	protein_coding	1.11355	0.0228607
ENSMUSG00000058537,3	AW822073	protein_coding	1.11308	0.00161416
ENSMUSG00000032834,10	Pwp2	protein_coding	1.11261	0.00773373
ENSMUSG00000033597,8	Caskin1	protein_coding	1.11223	0.0196065
ENSMUSG00000033099,5	Nol12	protein_coding	1.11183	0.0113434
ENSMUSG00000054874,8	Pcnxl3	protein_coding	1.11163	0.00119515
ENSMUSG00000028948,12	Nol9	protein_coding	1.11127	0.0318808
ENSMUSG00000052142,11	Rasal3	protein_coding	1.11077	0.0204997
ENSMUSG00000034394,10	Lif	protein_coding	1.11073	0.0121519
ENSMUSG00000024883,6	Rin1	protein_coding	1.11069	0.00283589
ENSMUSG00000033720,8	Sfxn5	protein_coding	1.10997	0.013071
ENSMUSG00000024875,4	Yif1a	protein_coding	1.10969	0.013027
ENSMUSG00000005373,9	Mlxipl	protein_coding	1.10961	0.0146987
ENSMUSG00000028798,12	Eif3i	protein_coding	1.10945	0.0394335
ENSMUSG00000002319,11	Ipo4	protein_coding	1.10914	0.0319369
ENSMUSG00000015127,10	Unkl	protein_coding	1.10825	0.0247518
ENSMUSG00000050357,8	Rltpr	protein_coding	1.10685	0.0101381
ENSMUSG00000041130,9	Zfp598	protein_coding	1.10678	0.0475376
ENSMUSG00000060261,11	Gtf2i	protein_coding	1.10671	0.00194697
ENSMUSG00000037432,12	Fer1l5	protein_coding	1.10665	0.00228674
ENSMUSG00000038604,8	Fam65a	protein_coding	1.10654	0.00974545
ENSMUSG00000045404,11	Kcnk13	protein_coding	1.10579	0.0413852
ENSMUSG00000034911,7	Ushbp1	protein_coding	1.10412	0.0243058
ENSMUSG00000012296,11	Tjap1	protein_coding	1.10379	0.037334
ENSMUSG00000102752,1	Gm7694	protein_coding	1.10349	0.0265137
ENSMUSG00000036040,10	Adamtsl2	protein_coding	1.10346	0.00740331
ENSMUSG00000016763,10	Scube1	protein_coding	1.10341	0.0180467
ENSMUSG00000019055,11	Plod1	protein_coding	1.10337	0.0117252
ENSMUSG00000018476,7	Kdm6b	protein_coding	1.10303	0.0167573
ENSMUSG00000024410,10	3110002H16Rik	protein_coding	1.10287	0.0173788
ENSMUSG00000054708,13	Ankrd24	protein_coding	1.10239	0.00413698
ENSMUSG00000036281,9	Snapc4	protein_coding	1.10203	0.0184883
ENSMUSG00000016933,13	Plcg1	protein_coding	1.10194	0.00200187
ENSMUSG00000061894,11	Zscan20	protein_coding	1.10183	0.00635962
ENSMUSG00000018428,11	Akap1	protein_coding	1.10159	0.00541265
ENSMUSG00000000632,9	Sez6	protein_coding	1.1014	0.00747339
ENSMUSG00000036046,10	5031439G07Rik	protein_coding	1.10062	0.00529257
ENSMUSG00000087543,1	Gm16576	lincRNA	1.10057	0.0215064
ENSMUSG00000073430,4	Gm10505	lincRNA	1.09916	0.0432466
ENSMUSG00000006958,9	Chrd	protein_coding	1.09823	0.0219394
ENSMUSG00000034799,12	Unc13a	protein_coding	1.09806	0.00197074
[truncated: 253 more rows]

## Sheet: Sheet_d
RNAs overexpressed in EVs from 4T1 shRalB cells Vs EVs from shCtl cells (padj<0,05; Log2FC>1)
RNA ID	symbol	genetype	log2FoldChange	padj
ENSMUSG00000035448,8	Ccr3	protein_coding	2.68687	6.93859e-05
ENSMUSG00000073601,2	Serpinb3c	protein_coding	2.64607	0.00103535
ENSMUSG00000085264,1	Gm15581	antisense	2.5736	0.00021416
ENSMUSG00000029272,7	Sult1e1	protein_coding	2.55564	0.00198037
ENSMUSG00000049164,6	Zfp518a	protein_coding	2.52019	4.33445e-06
ENSMUSG00000092109,2	Gm9376	protein_coding	2.46436	0.00144187
ENSMUSG00000029372,6	Ppbp	protein_coding	2.38791	0.000850612
ENSMUSG00000033721,12	Vav3	protein_coding	2.37898	4.0068e-05
ENSMUSG00000047696,12	Ccdc144b	protein_coding	2.36291	0.00353916
ENSMUSG00000056910,4	Vmn2r107	protein_coding	2.35448	0.00189711
ENSMUSG00000047940,9	Stpg2	protein_coding	2.32956	0.00397411
ENSMUSG00000019877,6	Serinc1	protein_coding	2.3217	0.000186413
ENSMUSG00000026100,6	Mstn	protein_coding	2.31129	0.00589293
ENSMUSG00000046913,1	Olfr1451	protein_coding	2.266	0.00280776
ENSMUSG00000056912,7	1700017N19Rik	protein_coding	2.25326	5.84008e-05
ENSMUSG00000042993,6	Ifnk	protein_coding	2.25193	0.00226447
ENSMUSG00000104180,1	RP23-269P13,1	TEC	2.24427	0.00853692
ENSMUSG00000091378,1	Gm4219	processed_transcript	2.2429	0.000129463
ENSMUSG00000086148,1	Gm15271	lincRNA	2.22858	0.00194697
ENSMUSG00000042447,9	Mios	protein_coding	2.20729	0.000239827
ENSMUSG00000077394,1	Gm24339	snoRNA	2.20153	0.00239944
ENSMUSG00000022773,12	Ypel1	protein_coding	2.19196	0.0134292
ENSMUSG00000101370,1	Gm29139	lincRNA	2.18922	0.00765167
ENSMUSG00000026166,10	Ccl20	protein_coding	2.18554	0.00212511
ENSMUSG00000032985,11	5730522E02Rik	protein_coding	2.17851	0.000398364
ENSMUSG00000051285,13	Pcmtd1	protein_coding	2.17658	0.00018903
ENSMUSG00000070594,6	Gm4788	protein_coding	2.17621	0.00924914
ENSMUSG00000045780,2	Olfr624	protein_coding	2.16955	0.0112695
ENSMUSG00000037608,11	Bclaf1	protein_coding	2.16625	4.09779e-07
ENSMUSG00000022366,8	Slc22a22	protein_coding	2.1659	0.00119933
ENSMUSG00000074882,3	Cyp2c68	protein_coding	2.16485	0.00450242
ENSMUSG00000060445,7	Sycp2	protein_coding	2.16026	0.0012387
ENSMUSG00000104226,1	RP23-404K2,2	processed_pseudogene	2.15404	0.00623489
ENSMUSG00000019906,10	Lin7a	protein_coding	2.13952	0.00021416
ENSMUSG00000095893,2	Olfr884	protein_coding	2.12944	0.00496425
ENSMUSG00000031167,12	Rbm3	protein_coding	2.12386	0.0029756
ENSMUSG00000085569,1	Gm12602	processed_transcript	2.11561	0.0051901
ENSMUSG00000090773,3	Vmn2r-ps69	unprocessed_pseudogene	2.11489	0.00899504
ENSMUSG00000092210,1	A930009A15Rik	protein_coding	2.11479	0.011382
ENSMUSG00000014074,13	Rnf168	protein_coding	2.11314	3.85833e-05
ENSMUSG00000079555,1	Haus3	protein_coding	2.11188	0.00446059
ENSMUSG00000074404,5	Gm1698	lincRNA	2.11047	0.00899504
ENSMUSG00000080907,1	4930455H04Rik	protein_coding	2.10066	0.00728525
ENSMUSG00000068606,5	Gm4841	protein_coding	2.10032	0.00211304
ENSMUSG00000022034,9	Esco2	protein_coding	2.09725	0.00197074
ENSMUSG00000100703,2	Gm28358	transcribed_unprocessed_pseudogene	2.09576	0.0128118
ENSMUSG00000036446,4	Lum	protein_coding	2.09133	0.00634285
ENSMUSG00000092447,1	Gm7696	unprocessed_pseudogene	2.08321	0.0183003
ENSMUSG00000056313,5	1810011O10Rik	protein_coding	2.0801	0.00586711
ENSMUSG00000019998,5	Stx7	protein_coding	2.07758	0.00197074
ENSMUSG00000102004,1	4933402C06Rik	lincRNA	2.07696	0.00504659
ENSMUSG00000102800,1	RP23-322G4,1	TEC	2.0749	0.00284439
ENSMUSG00000102483,1	RP23-474A1,1	unprocessed_pseudogene	2.07257	0.000520982
ENSMUSG00000040282,9	BC052040	protein_coding	2.07152	0.0012146
ENSMUSG00000089706,3	B230216N24Rik	processed_transcript	2.06924	0.000518478
ENSMUSG00000103849,1	RP23-35F4,2	TEC	2.06731	0.00633345
ENSMUSG00000086316,3	2210013O21Rik	processed_transcript	2.06684	0.00493216
ENSMUSG00000078160,2	Gm16503	protein_coding	2.06549	0.00043941
ENSMUSG00000026986,10	Hnmt	protein_coding	2.06161	0.0048054
ENSMUSG00000031519,2	Asb5	protein_coding	2.06073	0.00698193
ENSMUSG00000075197,1	Olfr1046	protein_coding	2.05122	0.0140476
ENSMUSG00000082829,1	Gm15780	processed_pseudogene	2.049	0.0145989
ENSMUSG00000030562,12	Nox4	protein_coding	2.04848	0.000391118
ENSMUSG00000001774,7	Chordc1	protein_coding	2.04537	0.00730294
ENSMUSG00000100706,2	Gm19744	processed_transcript	2.04444	0.00155319
ENSMUSG00000081307,1	Gm13627	processed_pseudogene	2.03833	0.0148318
ENSMUSG00000098099,1	Gm7456	processed_pseudogene	2.03616	0.017336
ENSMUSG00000103181,1	RP23-121N19,3	lincRNA	2.03176	0.00812545
ENSMUSG00000097452,1	Gm2824	lincRNA	2.02996	0.000543377
ENSMUSG00000021213,7	Akr1c13	protein_coding	2.02979	0.00939621
ENSMUSG00000103494,1	RP23-366M5,2	TEC	2.0253	0.00296866
ENSMUSG00000049926,3	Olfr921	protein_coding	2.02495	0.0166755
ENSMUSG00000078599,5	Skint8	protein_coding	2.02445	0.0063635
ENSMUSG00000104078,1	RP23-16D16,4	TEC	2.01961	0.00837343
ENSMUSG00000055782,8	Abcd2	protein_coding	2.0175	0.00138661
ENSMUSG00000103214,1	RP23-21P2,7	TEC	2.01721	0.0148873
ENSMUSG00000047702,1	Olfr1388	protein_coding	2.01717	0.0110257
ENSMUSG00000073927,3	Olfr652	protein_coding	2.01412	0.0152856
ENSMUSG00000083594,1	Gm13722	processed_pseudogene	2.01145	0.0161718
ENSMUSG00000104036,1	RP24-150D10,2	TEC	2.01038	0.0182917
ENSMUSG00000024259,8	Slc25a46	protein_coding	2.00955	0.00337889
ENSMUSG00000089991,2	Gm16332	unprocessed_pseudogene	2.00488	0.00510595
ENSMUSG00000027835,7	Pdcd10	protein_coding	2.00242	0.00951201
ENSMUSG00000029780,10	Nt5c3	protein_coding	1.99863	0.00227083
ENSMUSG00000067101,5	1700010H22Rik	lincRNA	1.99645	0.00315051
ENSMUSG00000102691,1	RP23-415C3,8	TEC	1.99379	0.0151002
ENSMUSG00000032357,8	Tinag	protein_coding	1.99228	0.0215158
ENSMUSG00000025903,10	Lypla1	protein_coding	1.98881	0.000771905
ENSMUSG00000067780,3	Pi15	protein_coding	1.98329	0.000903887
ENSMUSG00000031093,10	Dock11	protein_coding	1.97757	0.00146408
ENSMUSG00000024815,4	Trpd52l3	protein_coding	1.96917	0.000741477
ENSMUSG00000073656,4	Gm10558	antisense	1.96792	0.00233915
ENSMUSG00000100053,1	Gm28154	antisense	1.96742	0.00503295
ENSMUSG00000103805,1	RP23-239I17,7	TEC	1.96687	0.00896808
ENSMUSG00000023802,4	Nox3	protein_coding	1.96373	0.00169423
ENSMUSG00000095569,1	Taar7d	protein_coding	1.96146	0.0203287
ENSMUSG00000033538,9	Casp4	protein_coding	1.96075	0.00922024
ENSMUSG00000103146,1	RP23-274C16,4	TEC	1.95773	1.65873e-05
ENSMUSG00000059182,5	Skap2	protein_coding	1.95667	0.00124445
ENSMUSG00000039508,5	Fam26d	protein_coding	1.9565	0.00215506
ENSMUSG00000096436,1	Olfr1437	protein_coding	1.95584	0.0185487
ENSMUSG00000102236,1	RP23-109O14,1	TEC	1.95473	0.026062
ENSMUSG00000070677,5	D5Ertd577e	protein_coding	1.95133	0.0208076
ENSMUSG00000032757,4	Bet1	protein_coding	1.95024	0.00132322
ENSMUSG00000066372,5	Vmn2r65	protein_coding	1.94922	0.0174292
ENSMUSG00000086349,1	Gm13497	lincRNA	1.94791	0.0117911
ENSMUSG00000024766,10	Lipo1	protein_coding	1.94761	0.00907617
ENSMUSG00000031518,6	Spata4	protein_coding	1.94712	0.00560409
ENSMUSG00000102827,1	RP23-56B11,5	transcribed_processed_pseudogene	1.94621	0.0235364
ENSMUSG00000103398,1	RP23-210I20,3	TEC	1.94402	0.0154109
ENSMUSG00000096764,1	Gm21985	protein_coding	1.94029	0.0198835
ENSMUSG00000020397,11	Med7	protein_coding	1.93909	0.0210186
ENSMUSG00000074946,3	Olfr1313	protein_coding	1.93791	0.0208779
ENSMUSG00000097051,1	Gm26836	lincRNA	1.93406	0.018095
ENSMUSG00000030143,7	Gm8882	protein_coding	1.93211	0.0230249
ENSMUSG00000096840,1	Olfr136	protein_coding	1.92927	0.0213193
ENSMUSG00000096555,1	Olfr944	protein_coding	1.92806	0.0103923
ENSMUSG00000040132,6	Svs2	protein_coding	1.92759	0.00861527
ENSMUSG00000031196,9	F8	protein_coding	1.92472	0.000917793
ENSMUSG00000082774,1	Gm8805	processed_pseudogene	1.92435	0.0204482
ENSMUSG00000046258,4	Adam29	protein_coding	1.92374	0.00898339
ENSMUSG00000073973,3	Olfr552	protein_coding	1.91782	0.0171733
ENSMUSG00000104287,1	RP24-111L14,1	TEC	1.91495	0.00661293
ENSMUSG00000001891,12	Ugp2	protein_coding	1.91317	0.00197074
ENSMUSG00000104197,1	RP23-44N5,7	TEC	1.91255	0.00623508
ENSMUSG00000050190,3	Gm5346	protein_coding	1.90647	0.0069971
ENSMUSG00000104374,1	RP24-383H12,2	TEC	1.9051	0.0236597
ENSMUSG00000103105,1	RP23-436K7,2	transcribed_unprocessed_pseudogene	1.90421	0.00907223
ENSMUSG00000035387,5	4930415L06Rik	protein_coding	1.90351	0.0242905
ENSMUSG00000034663,9	Bmp2k	protein_coding	1.90194	4.14182e-05
ENSMUSG00000098877,1	Gm27959	rRNA	1.90179	2.62225e-05
ENSMUSG00000102293,1	RP23-26I10,4	TEC	1.89537	0.00286606
ENSMUSG00000102657,1	RP23-204I16,3	TEC	1.89414	0.00016395
ENSMUSG00000001948,9	Spa17	protein_coding	1.89292	0.0177371
ENSMUSG00000036934,8	4921524J17Rik	protein_coding	1.89104	0.0296103
ENSMUSG00000027857,6	Tshb	protein_coding	1.89021	0.0144074
ENSMUSG00000052419,7	2610001J05Rik	protein_coding	1.88964	0.00765437
ENSMUSG00000003617,12	Cp	protein_coding	1.88786	0.000137295
ENSMUSG00000102451,1	RP24-260D21,2	TEC	1.88682	0.00755373
ENSMUSG00000028008,6	Asic5	protein_coding	1.88669	0.0115071
ENSMUSG00000025531,10	Chm	protein_coding	1.88626	0.00193936
ENSMUSG00000082884,1	Gm13339	unprocessed_pseudogene	1.8861	0.000202168
ENSMUSG00000103434,1	RP24-294A16,3	TEC	1.8856	0.0255183
ENSMUSG00000079029,2	Gm5662	protein_coding	1.88327	0.0121981
ENSMUSG00000086479,1	Gm16014	sense_intronic	1.88056	0.0205888
ENSMUSG00000102570,1	RP24-511H12,4	TEC	1.87977	0.00918175
ENSMUSG00000103657,1	RP23-116P18,2	TEC	1.87533	0.00738503
ENSMUSG00000035349,5	Mia2	protein_coding	1.874	0.00586348
ENSMUSG00000027829,11	Ccnl1	protein_coding	1.87381	0.00429807
ENSMUSG00000098041,1	Gm26981	lincRNA	1.87365	0.0203828
ENSMUSG00000079658,5	Tceb1	protein_coding	1.8692	0.000104499
ENSMUSG00000019894,9	Slc6a15	protein_coding	1.86834	0.00536209
ENSMUSG00000039717,11	Ralyl	protein_coding	1.86685	0.0167573
ENSMUSG00000104432,1	RP23-16D16,13	TEC	1.86629	0.028465
ENSMUSG00000029245,12	Epha5	protein_coding	1.86283	0.000154138
ENSMUSG00000019900,13	Rfx6	protein_coding	1.8626	0.000248227
ENSMUSG00000096229,1	Olfr774	protein_coding	1.86126	0.0306748
ENSMUSG00000045657,3	Pcdhb10	protein_coding	1.86041	0.02289
ENSMUSG00000096585,1	Gm22917	miRNA	1.85937	0.0135283
ENSMUSG00000091879,1	Vmn2r17	protein_coding	1.85739	0.0169751
ENSMUSG00000025588,3	Nat1	protein_coding	1.85595	0.0265429
ENSMUSG00000036902,9	Neto2	protein_coding	1.85528	0.00020135
ENSMUSG00000039630,9	Hnrnpu	protein_coding	1.85215	0.00583691
ENSMUSG00000031274,12	Col4a5	protein_coding	1.85213	0.00128938
ENSMUSG00000034329,12	Brip1	protein_coding	1.8521	7.99432e-06
ENSMUSG00000085510,1	Gm12082	lincRNA	1.85117	0.0339915
ENSMUSG00000102401,1	RP24-323I23,1	sense_intronic	1.85105	0.0107071
ENSMUSG00000022432,6	Smc1b	protein_coding	1.85035	0.00094353
ENSMUSG00000085109,1	Gm15356	antisense	1.84907	0.0195366
ENSMUSG00000097199,1	Gm26991	unprocessed_pseudogene	1.84631	0.0308904
ENSMUSG00000029663,7	Gngt1	protein_coding	1.84444	0.00267982
ENSMUSG00000034007,9	Scaper	protein_coding	1.84407	5.84008e-05
ENSMUSG00000027981,10	Rnpc3	protein_coding	1.84211	0.0122668
ENSMUSG00000103525,1	RP24-193D9,3	TEC	1.84025	0.0271372
ENSMUSG00000104489,1	RP24-217M2,2	processed_pseudogene	1.83992	0.0313947
ENSMUSG00000021718,5	4933425L06Rik	protein_coding	1.83949	0.0159075
ENSMUSG00000027720,7	Il2	protein_coding	1.83799	0.017084
ENSMUSG00000066613,10	Zfp932	protein_coding	1.83727	0.0171733
ENSMUSG00000067010,3	Vmn2r10	protein_coding	1.8358	0.00496742
ENSMUSG00000091972,1	Tmem207	protein_coding	1.8336	0.0190907
ENSMUSG00000030942,7	Thumpd1	protein_coding	1.83213	0.00684003
ENSMUSG00000029282,3	Amtn	protein_coding	1.83048	0.022764
ENSMUSG00000085940,1	4930405D11Rik	lincRNA	1.83025	0.0258253
ENSMUSG00000079058,1	Adam34	protein_coding	1.82931	0.0108257
ENSMUSG00000072934,6	Trpc5os	antisense	1.82814	0.0344968
ENSMUSG00000029882,5	2210010C04Rik	protein_coding	1.82768	0.0123249
ENSMUSG00000031139,10	Mcf2	protein_coding	1.8272	0.013071
ENSMUSG00000090565,3	4930405O22Rik	sense_intronic	1.82555	0.0240781
ENSMUSG00000035293,9	G2e3	protein_coding	1.82433	0.0148857
ENSMUSG00000024768,5	Lipf	protein_coding	1.82344	0.00581442
ENSMUSG00000024614,6	Tmx3	protein_coding	1.82306	0.00857111
ENSMUSG00000085070,1	Gm13211	lincRNA	1.82152	0.0292406
ENSMUSG00000034122,13	Nlrp4d	transcribed_unprocessed_pseudogene	1.82093	0.00892202
ENSMUSG00000086592,1	Gm12682	antisense	1.8209	0.022973
ENSMUSG00000076939,1	Iglv3	IG_LV_gene	1.82035	0.0354858
ENSMUSG00000084834,1	4930565N06Rik	antisense	1.82003	0.0196766
ENSMUSG00000094597,1	Gm4810	processed_pseudogene	1.81807	0.0281588
ENSMUSG00000096065,1	Gm13155	processed_pseudogene	1.81724	0.00511097
ENSMUSG00000018189,8	Uchl5	protein_coding	1.8155	0.0129642
ENSMUSG00000022877,8	Hrg	protein_coding	1.81075	0.00513951
ENSMUSG00000022829,10	Stxbp5l	protein_coding	1.80876	0.000718616
ENSMUSG00000027379,9	Bub1	protein_coding	1.80593	0.00624981
ENSMUSG00000020149,13	Rab1	protein_coding	1.80326	0.00170087
ENSMUSG00000032854,8	Ugt8a	protein_coding	1.80202	0.00951201
ENSMUSG00000067656,9	Slc22a27	protein_coding	1.79997	0.00351879
ENSMUSG00000101568,1	1700040F17Rik	antisense	1.79911	0.0316324
ENSMUSG00000039539,9	Sgcz	protein_coding	1.79772	0.00183834
ENSMUSG00000084933,1	Gm13962	antisense	1.79687	0.0265054
ENSMUSG00000057228,5	Aadat	protein_coding	1.7905	0.0131238
ENSMUSG00000025597,9	Klhl4	protein_coding	1.79044	0.0263716
ENSMUSG00000104116,1	RP23-61D6,5	TEC	1.79023	0.0340426
ENSMUSG00000051616,10	C230029F24Rik	lincRNA	1.78846	0.0177088
ENSMUSG00000051052,7	Olfr335-ps	unprocessed_pseudogene	1.78804	0.0313386
ENSMUSG00000025968,12	Ndufs1	protein_coding	1.7876	0.0137924
ENSMUSG00000101225,1	1700008J07Rik	antisense	1.78555	0.0368924
ENSMUSG00000104433,1	RP23-28G12,2	TEC	1.78452	0.0240893
ENSMUSG00000053825,10	Ppfia2	protein_coding	1.78345	0.000657686
ENSMUSG00000095294,1	Gm21119	protein_coding	1.78305	0.00518316
ENSMUSG00000019878,7	Hsf2	protein_coding	1.78206	0.00769215
ENSMUSG00000030614,7	Tmem126b	protein_coding	1.78073	0.0101979
ENSMUSG00000079242,2	C730034F03Rik	protein_coding	1.78042	0.0370636
ENSMUSG00000095696,1	Olfr786	protein_coding	1.7797	0.0294708
ENSMUSG00000102939,1	RP23-16D16,12	TEC	1.77936	0.0246054
ENSMUSG00000099763,1	Olfr1311	protein_coding	1.7792	0.0388824
ENSMUSG00000028261,9	Ndufaf4	protein_coding	1.77584	0.0297158
ENSMUSG00000061246,4	Olfr387-ps1	transcribed_unprocessed_pseudogene	1.77421	0.0282075
ENSMUSG00000103881,1	RP24-257J5,2	TEC	1.77309	0.0382392
ENSMUSG00000102407,1	RP23-21P2,6	TEC	1.77086	0.0357552
ENSMUSG00000028188,9	Spata1	protein_coding	1.76894	0.000805427
ENSMUSG00000043003,9	Rasef	protein_coding	1.76879	0.0030727
ENSMUSG00000003053,13	Cyp2c29	protein_coding	1.76846	0.00486794
ENSMUSG00000094396,1	Vmn2r124	protein_coding	1.76527	0.016923
ENSMUSG00000022757,14	Tfg	protein_coding	1.76487	0.0154835
ENSMUSG00000057816,3	1700007G11Rik	protein_coding	1.7643	0.0323934
ENSMUSG00000019779,10	Frk	protein_coding	1.76407	0.00174205
ENSMUSG00000028211,7	Trp53inp1	protein_coding	1.76287	0.00018867
ENSMUSG00000069818,4	Olfr390	protein_coding	1.76223	0.0254732
ENSMUSG00000028693,11	Nasp	protein_coding	1.76068	1.55874e-05
ENSMUSG00000096743,1	Vmn2r32	protein_coding	1.75887	0.0285812
ENSMUSG00000103496,1	RP24-375O19,1	TEC	1.75786	0.0346119
ENSMUSG00000039578,12	Ccser1	protein_coding	1.75626	0.00377698
ENSMUSG00000086608,1	4930562D21Rik	antisense	1.75592	0.0300401
ENSMUSG00000074655,1	Gm1527	protein_coding	1.75508	0.0253366
ENSMUSG00000104325,1	RP23-392C14,1	TEC	1.75478	0.0313582
ENSMUSG00000028197,4	Col24a1	protein_coding	1.75463	0.000786941
ENSMUSG00000085638,1	Gm15521	sense_intronic	1.75435	0.0343923
ENSMUSG00000102348,1	RP23-122M2,2	TEC	1.75335	0.0309099
ENSMUSG00000040034,11	Nup43	protein_coding	1.75205	0.0197109
ENSMUSG00000055371,13	Stam2	protein_coding	1.74689	0.00115864
ENSMUSG00000099784,1	Gm28525	lincRNA	1.74573	0.0219587
ENSMUSG00000102330,1	RP24-176F12,6	TEC	1.74444	0.0378209
ENSMUSG00000021796,10	Bmpr1a	protein_coding	1.74417	0.000706175
ENSMUSG00000083863,1	Gm13341	unprocessed_pseudogene	1.74294	0.0397678
ENSMUSG00000066027,6	Gm10436	protein_coding	1.74052	0.0402155
ENSMUSG00000103161,1	RP23-115I1,3	TEC	1.73992	0.0285193
ENSMUSG00000100510,2	AV026068	processed_transcript	1.73926	0.00713753
ENSMUSG00000026999,10	Nup35	protein_coding	1.73909	0.0141078
ENSMUSG00000102907,1	RP23-335P21,1	TEC	1.73902	0.0192453
ENSMUSG00000045336,5	Hsfy2	protein_coding	1.73897	0.0361185
ENSMUSG00000017418,9	Arl5b	protein_coding	1.73623	0.000837031
ENSMUSG00000094970,1	Olfr943	protein_coding	1.73557	0.00556267
ENSMUSG00000096958,1	Gm26573	lincRNA	1.73527	0.0047988
ENSMUSG00000091260,1	Vmn2r19	protein_coding	1.73466	0.0312591
ENSMUSG00000055370,3	Gm9968	lincRNA	1.73416	0.0253635
ENSMUSG00000084927,1	Gm5724	protein_coding	1.73374	0.041977
ENSMUSG00000043263,9	Pyhin1	protein_coding	1.73304	0.0120371
ENSMUSG00000046523,4	Kctd4	protein_coding	1.7327	0.0231322
ENSMUSG00000086199,3	Bcas3os1	antisense	1.73269	0.00787605
ENSMUSG00000071350,8	Setdb2	protein_coding	1.73166	0.0160621
ENSMUSG00000026032,8	Ndufb3	protein_coding	1.73081	0.0379485
ENSMUSG00000029267,13	Mtf2	protein_coding	1.73079	0.00280507
ENSMUSG00000087112,1	Gm7237	lincRNA	1.73077	0.0266974
ENSMUSG00000031130,3	Brs3	protein_coding	1.73073	0.031692
ENSMUSG00000103924,1	RP23-184I13,4	TEC	1.73026	0.0368924
ENSMUSG00000050921,8	P2ry10	protein_coding	1.72976	0.0313857
ENSMUSG00000103143,1	RP23-415C3,4	TEC	1.72919	0.00298372
ENSMUSG00000026335,12	Pam	protein_coding	1.72854	1.30427e-05
ENSMUSG00000102990,1	RP23-53N22,4	TEC	1.72845	0.00704354
ENSMUSG00000087303,2	Lipo2	protein_coding	1.7284	0.00639069
ENSMUSG00000053574,4	4930563E22Rik	processed_transcript	1.72768	0.01472
ENSMUSG00000094921,1	Vmn2r112	protein_coding	1.72744	0.0046343
ENSMUSG00000016481,11	Cr1l	protein_coding	1.72683	0.000134438
ENSMUSG00000023403,10	Stk31	protein_coding	1.72657	0.0290134
ENSMUSG00000043340,3	6530409C15Rik	protein_coding	1.72566	0.031692
ENSMUSG00000092080,1	Vmn2r16	protein_coding	1.72531	0.0392685
ENSMUSG00000063779,5	Chil4	protein_coding	1.72524	0.0327805
ENSMUSG00000044548,7	Dact1	protein_coding	1.72522	0.0148956
ENSMUSG00000100230,1	Gm28650	processed_pseudogene	1.72519	0.0430059
ENSMUSG00000104145,1	RP23-44N5,3	TEC	1.72345	0.0246737
ENSMUSG00000102359,1	RP23-26A10,3	TEC	1.71942	0.0221342
ENSMUSG00000061039,3	Olfr920	protein_coding	1.71773	0.0172116
ENSMUSG00000084237,1	Gm11781	processed_pseudogene	1.71647	0.0467021
ENSMUSG00000056966,6	Gjc3	protein_coding	1.71461	0.00508546
ENSMUSG00000032179,7	Bmp5	protein_coding	1.71371	0.0209459
ENSMUSG00000093650,2	Gm20631	antisense	1.71245	0.00350994
ENSMUSG00000067529,1	Olfr1423	protein_coding	1.71243	0.0238903
ENSMUSG00000102868,1	RP23-259O15,2	TEC	1.71217	0.0190616
ENSMUSG00000094707,1	A830019P07Rik	lincRNA	1.71204	0.0272248
ENSMUSG00000041138,11	Nme8	protein_coding	1.7095	0.00958545
ENSMUSG00000040549,12	Ckap5	protein_coding	1.7092	9.27523e-05
ENSMUSG00000061313,7	Ddhd2	protein_coding	1.70663	0.00063382
ENSMUSG00000102785,1	RP24-92E18,1	lincRNA	1.70661	0.0285193
ENSMUSG00000102744,1	RP24-490B17,6	TEC	1.70659	0.0234862
ENSMUSG00000025044,11	Msr1	protein_coding	1.70437	0.0136904
ENSMUSG00000074109,4	Mrgprx2	protein_coding	1.7032	0.0126778
ENSMUSG00000056300,10	Gm13247	protein_coding	1.70083	0.00148578
ENSMUSG00000041052,8	Slc7a13	protein_coding	1.70039	0.0318808
ENSMUSG00000070458,4	Vmn2r73	protein_coding	1.69975	0.024231
ENSMUSG00000081657,1	Gm15466	processed_pseudogene	1.69901	0.0332885
ENSMUSG00000103646,1	RP23-379C24,2	TEC	1.69888	0.0243058
ENSMUSG00000036095,10	Dgkb	protein_coding	1.69874	0.00176675
ENSMUSG00000037940,11	Inpp4b	protein_coding	1.69874	1.65873e-05
ENSMUSG00000002617,10	Zfp40	protein_coding	1.6987	0.00731007
ENSMUSG00000042323,12	Pbrm1	protein_coding	1.69835	0.00018903
ENSMUSG00000086842,2	Gm15681	processed_pseudogene	1.6979	0.0403497
ENSMUSG00000084787,1	Gm12436	lincRNA	1.69584	0.0117462
ENSMUSG00000102863,1	RP23-103F2,4	TEC	1.69549	0.0236597
ENSMUSG00000005362,10	Crbn	protein_coding	1.69476	0.013071
ENSMUSG00000099373,1	Gm19667	antisense	1.69313	0.0234862
ENSMUSG00000050891,8	Tatdn1	protein_coding	1.69269	0.00403706
ENSMUSG00000097177,3	9330159M07Rik	processed_transcript	1.69251	0.0188815
ENSMUSG00000034160,9	Ogt	protein_coding	1.69177	0.00795561
ENSMUSG00000104350,1	RP23-175B15,2	TEC	1.6902	0.0258701
ENSMUSG00000104293,1	RP23-363M8,2	TEC	1.68767	0.00873214
ENSMUSG00000040124,5	Gorab	protein_coding	1.68427	0.0069971
ENSMUSG00000070313,4	A630095E13Rik	protein_coding	1.68413	0.00250807
ENSMUSG00000086819,1	Gm13613	antisense	1.68292	0.031692
ENSMUSG00000000197,7	Nalcn	protein_coding	1.68189	0.000657686
ENSMUSG00000056023,3	Gm9989	processed_transcript	1.68188	0.0258701
ENSMUSG00000094488,1	Olfr393	protein_coding	1.68168	0.0441771
ENSMUSG00000033460,10	Armcx1	protein_coding	1.68118	0.0258322
ENSMUSG00000027965,11	Olfm3	protein_coding	1.68	0.0171823
ENSMUSG00000035875,10	AI182371	protein_coding	1.67851	0.0134554
ENSMUSG00000102629,1	RP23-469J3,4	processed_transcript	1.67726	0.00944662
ENSMUSG00000081118,1	Gm6758	processed_pseudogene	1.67657	0.0230923
ENSMUSG00000035916,7	Ptprq	protein_coding	1.67539	8.29043e-05
ENSMUSG00000025997,9	Ikzf2	protein_coding	1.67536	8.56827e-05
ENSMUSG00000070354,9	Gm21975	protein_coding	1.67533	0.035766
ENSMUSG00000059218,10	Gm13084	protein_coding	1.67519	0.0323773
ENSMUSG00000032425,11	Zfp949	protein_coding	1.67491	0.00941746
ENSMUSG00000030557,12	Mef2a	protein_coding	1.67434	0.00334165
ENSMUSG00000031715,10	Smarca5	protein_coding	1.67352	8.56827e-05
ENSMUSG00000034488,10	Edil3	protein_coding	1.67227	0.000443869
ENSMUSG00000084884,1	Gm12289	antisense	1.67187	0.0481824
ENSMUSG00000083257,1	Gm15568	processed_pseudogene	1.67167	0.0444334
ENSMUSG00000024680,8	Ms4a2	protein_coding	1.6715	0.00233953
ENSMUSG00000094596,1	Gm10921	protein_coding	1.67088	0.00887659
ENSMUSG00000070866,4	Zfp804a	protein_coding	1.66994	0.015696
ENSMUSG00000103227,1	RP23-102B12,2	TEC	1.6685	0.0241466
ENSMUSG00000094010,1	Vmn1r119	protein_coding	1.66835	0.0401811
ENSMUSG00000026395,12	Ptprc	protein_coding	1.66828	1.65873e-05
ENSMUSG00000028180,14	Zranb2	protein_coding	1.66624	0.00225102
ENSMUSG00000026739,9	Bmi1	protein_coding	1.66546	0.00115864
ENSMUSG00000014725,10	Adam28	protein_coding	1.66507	0.0166755
ENSMUSG00000038174,10	Fam126b	protein_coding	1.66492	1.20351e-05
ENSMUSG00000036339,13	Tmem260	protein_coding	1.66358	0.00206873
ENSMUSG00000031201,13	Brcc3	protein_coding	1.66329	0.0148318
ENSMUSG00000104186,1	RP23-396C13,1	TEC	1.66279	0.0490141
ENSMUSG00000033446,7	Lpar6	protein_coding	1.66206	0.0284639
ENSMUSG00000103656,1	RP23-327M13,2	TEC	1.66126	0.0269992
ENSMUSG00000035836,2	Ugt2b1	protein_coding	1.6591	0.0140363
ENSMUSG00000062209,11	Erbb4	protein_coding	1.65863	3.43567e-05
ENSMUSG00000042554,6	Zp3r	protein_coding	1.65851	0.007235
ENSMUSG00000039488,11	Cntn5	protein_coding	1.65747	1.53939e-05
ENSMUSG00000103901,1	RP23-211O3,4	TEC	1.65604	0.0165399
ENSMUSG00000078198,1	Olfr364-ps1	protein_coding	1.65473	0.0384547
ENSMUSG00000030641,9	Ddias	protein_coding	1.65399	0.0346942
ENSMUSG00000102941,1	RP23-211F21,4	lincRNA	1.65368	0.0213271
ENSMUSG00000037400,12	Atp11b	protein_coding	1.65327	0.00194697
ENSMUSG00000040818,7	Dennd6a	protein_coding	1.653	0.00808868
ENSMUSG00000020137,4	Thap2	protein_coding	1.65096	0.0212014
ENSMUSG00000019577,4	Pdk4	protein_coding	1.65031	0.00136053
ENSMUSG00000028019,5	Pdgfc	protein_coding	1.64947	0.0169595
ENSMUSG00000056145,5	AI504432	lincRNA	1.64936	0.0246907
ENSMUSG00000046101,12	Mcmdc2	protein_coding	1.64846	0.014794
ENSMUSG00000091631,1	Vmn2r95	protein_coding	1.64838	0.0202861
ENSMUSG00000039174,10	1700003H04Rik	protein_coding	1.64804	0.0413852
ENSMUSG00000091635,1	Vmn2r13	protein_coding	1.64704	0.0190252
ENSMUSG00000053980,4	Gm9930	protein_coding	1.64636	0.0166755
ENSMUSG00000079262,3	Slco1a6	protein_coding	1.64522	0.0235152
ENSMUSG00000025527,5	Satl1	protein_coding	1.64407	0.033287
ENSMUSG00000040420,10	Cdh18	protein_coding	1.6423	0.00195947
ENSMUSG00000040455,13	Usp45	protein_coding	1.64094	0.00238134
ENSMUSG00000046351,6	Zfp322a	protein_coding	1.64041	0.00610753
ENSMUSG00000031379,9	Pir	protein_coding	1.64032	0.0246737
ENSMUSG00000084095,1	Gm11834	processed_pseudogene	1.63993	0.036663
ENSMUSG00000070844,6	Vmn2r42	protein_coding	1.63935	0.0147872
ENSMUSG00000074832,6	2410141K09Rik	protein_coding	1.63857	0.00250667
ENSMUSG00000021877,7	Arf4	protein_coding	1.63827	0.0407995
ENSMUSG00000020738,12	Sumo2	protein_coding	1.63804	0.0220153
ENSMUSG00000035898,9	Uba6	protein_coding	1.63795	0.00157997
ENSMUSG00000023150,10	Ivns1abp	protein_coding	1.63782	0.0028938
ENSMUSG00000054102,11	Nlrp9a	protein_coding	1.63609	0.0139462
ENSMUSG00000026399,8	Cd55	protein_coding	1.6351	0.0261112
ENSMUSG00000055447,14	Cd47	protein_coding	1.63452	0.0115401
ENSMUSG00000030366,6	Ceacam12	protein_coding	1.63424	0.0139885
ENSMUSG00000003418,11	St8sia6	protein_coding	1.63401	0.00153207
ENSMUSG00000090003,1	Gm15882	antisense	1.63378	0.0192644
ENSMUSG00000049176,10	Frmpd4	protein_coding	1.63319	0.00210014
ENSMUSG00000052504,6	Epha3	protein_coding	1.63265	0.00623508
ENSMUSG00000091318,2	Gm5415	protein_coding	1.63196	0.0211071
ENSMUSG00000104467,1	RP23-79K5,4	TEC	1.63187	0.0449055
ENSMUSG00000101175,1	Gm29151	lincRNA	1.6316	0.0476453
ENSMUSG00000026824,7	Kcnj3	protein_coding	1.62975	0.0342593
ENSMUSG00000029686,11	Cul1	protein_coding	1.62969	0.013238
ENSMUSG00000025321,10	Itgb8	protein_coding	1.62965	4.25463e-05
ENSMUSG00000069743,4	Zfp820	protein_coding	1.62869	0.0257193
ENSMUSG00000042444,9	Fam63b	protein_coding	1.62702	0.0029336
ENSMUSG00000078546,4	2210404O09Rik	protein_coding	1.62627	0.0014118
ENSMUSG00000100635,1	Gm29157	lincRNA	1.62566	0.0390892
ENSMUSG00000102950,1	RP23-73N8,2	TEC	1.62423	0.0270382
ENSMUSG00000048787,8	Dcun1d3	protein_coding	1.62313	0.00199775
ENSMUSG00000023930,9	Crisp2	protein_coding	1.62273	0.0196658
ENSMUSG00000030313,11	Dennd5b	protein_coding	1.62202	0.000501659
ENSMUSG00000027349,5	Fam98b	protein_coding	1.62165	0.0079308
ENSMUSG00000031703,7	Itfg1	protein_coding	1.62122	0.0126778
ENSMUSG00000032262,9	Elovl4	protein_coding	1.61962	0.0105416
ENSMUSG00000028182,10	Lrriq3	protein_coding	1.61937	0.00936602
ENSMUSG00000104121,1	RP23-26I10,1	TEC	1.61916	0.0316011
ENSMUSG00000028343,6	Erp44	protein_coding	1.61839	0.011148
ENSMUSG00000032407,9	U2surp	protein_coding	1.61672	0.00012695
ENSMUSG00000079608,6	Stard6	protein_coding	1.61483	0.0419265
ENSMUSG00000044022,5	Pcdhb21	protein_coding	1.61359	0.0388824
ENSMUSG00000085716,1	Gm13388	antisense	1.6119	0.0265054
ENSMUSG00000039985,10	Fam60a	protein_coding	1.61141	0.0162663
ENSMUSG00000032437,9	Stt3b	protein_coding	1.61129	0.00388857
ENSMUSG00000031592,9	Pcm1	protein_coding	1.61105	7.99432e-06
ENSMUSG00000100711,1	Gm29461	lincRNA	1.61104	0.0148434
ENSMUSG00000054417,5	Cyp3a44	protein_coding	1.61022	0.038602
ENSMUSG00000023926,7	Rhag	protein_coding	1.61001	0.0317259
ENSMUSG00000028015,3	Ctso	protein_coding	1.60963	0.0160621
ENSMUSG00000027009,14	Itga4	protein_coding	1.60963	0.000103865
ENSMUSG00000020305,9	Asb3	protein_coding	1.60818	0.0373541
ENSMUSG00000030751,13	Psma1	protein_coding	1.60614	0.0438844
ENSMUSG00000097007,1	4930432B10Rik	lincRNA	1.60488	0.00578843
ENSMUSG00000037386,11	Rims2	protein_coding	1.60218	0.000110749
ENSMUSG00000031939,11	Taf1d	protein_coding	1.6015	0.00824117
ENSMUSG00000081570,1	Gm12192	processed_pseudogene	1.60087	0.0356931
ENSMUSG00000025240,8	Sacm1l	protein_coding	1.59995	0.0069608
ENSMUSG00000030443,12	Zfp583	protein_coding	1.59989	0.0143114
ENSMUSG00000103737,1	RP23-257D2,10	processed_pseudogene	1.59984	0.00430101
ENSMUSG00000060121,11	Gemin2	protein_coding	1.59943	0.0213103
ENSMUSG00000038702,6	Dsel	protein_coding	1.59909	0.00514427
ENSMUSG00000093934,1	Olfr971	protein_coding	1.59889	0.0372579
ENSMUSG00000032400,13	Zwilch	protein_coding	1.59823	0.000945578
ENSMUSG00000022792,12	Yars2	protein_coding	1.5977	0.0199389
ENSMUSG00000038936,9	Sccpdh	protein_coding	1.59756	0.00208171
ENSMUSG00000099478,1	Gm28370	antisense	1.59752	0.0120503
ENSMUSG00000031303,8	Map3k15	protein_coding	1.59709	0.0323813
ENSMUSG00000026049,7	Tex30	protein_coding	1.59644	0.0395375
ENSMUSG00000102521,1	RP23-247F18,6	TEC	1.59625	0.0373051
ENSMUSG00000079671,4	2610203C22Rik	processed_transcript	1.59566	0.00432318
ENSMUSG00000022935,10	Grik1	protein_coding	1.59515	0.0204979
ENSMUSG00000047193,11	Dync2h1	protein_coding	1.59501	6.18582e-05
ENSMUSG00000047996,12	Prrg1	protein_coding	1.59487	0.0179306
ENSMUSG00000048249,10	Crebrf	protein_coding	1.59486	0.00274732
ENSMUSG00000019794,9	Katna1	protein_coding	1.59377	0.0156435
ENSMUSG00000024679,6	Ms4a6d	protein_coding	1.59332	0.0172909
ENSMUSG00000026830,9	Ermn	protein_coding	1.59271	0.0180473
ENSMUSG00000031639,7	Tlr3	protein_coding	1.59265	0.00259728
ENSMUSG00000033487,10	Fndc3a	protein_coding	1.59193	0.00194697
ENSMUSG00000043154,11	Ppp2r3a	protein_coding	1.5916	0.000103865
ENSMUSG00000022523,9	Fgf12	protein_coding	1.59073	0.0301278
ENSMUSG00000067851,7	Arfgef1	protein_coding	1.59056	0.000212632
ENSMUSG00000097610,1	A930012L18Rik	lincRNA	1.58955	0.0227366
ENSMUSG00000019785,9	Clvs2	protein_coding	1.58909	0.00547502
ENSMUSG00000021302,9	Ggps1	protein_coding	1.58877	0.0482959
ENSMUSG00000102302,1	RP23-187M7,5	sense_intronic	1.58843	0.00161939
ENSMUSG00000102633,1	RP23-278E1,4	TEC	1.58485	0.0421735
ENSMUSG00000056019,8	Zfp709	protein_coding	1.58425	0.0249512
ENSMUSG00000036503,9	Rnf13	protein_coding	1.58401	0.0202672
ENSMUSG00000041763,10	Tpp2	protein_coding	1.58334	0.000239827
ENSMUSG00000025939,13	Ube2w	protein_coding	1.58297	0.0131162
ENSMUSG00000022329,10	Stk3	protein_coding	1.58268	0.00228476
ENSMUSG00000019892,8	Lrriq1	protein_coding	1.58249	0.000508625
ENSMUSG00000078798,4	Sult2a1	protein_coding	1.58175	0.0323813
ENSMUSG00000027961,5	Lrrc39	protein_coding	1.58099	0.0043787
ENSMUSG00000102672,1	RP23-296I6,4	TEC	1.58093	0.0265877
ENSMUSG00000089857,5	Zfp882	protein_coding	1.5808	0.00822581
ENSMUSG00000048015,3	Neurod4	protein_coding	1.58042	0.0169298
ENSMUSG00000028030,8	Tbck	protein_coding	1.58037	0.000366955
ENSMUSG00000020676,2	Ccl11	protein_coding	1.57956	0.0323309
ENSMUSG00000067225,1	Cyp2c54	protein_coding	1.57929	0.0140748
ENSMUSG00000001017,11	Chtop	protein_coding	1.57851	0.0182363
ENSMUSG00000034087,9	Nlrp4b	protein_coding	1.57831	0.00993247
ENSMUSG00000026107,7	Nabp1	protein_coding	1.57699	0.00080128
ENSMUSG00000056234,10	Ncoa4	protein_coding	1.57698	0.0375229
ENSMUSG00000056329,3	1810010K12Rik	processed_transcript	1.57679	0.0472533
ENSMUSG00000101373,1	Zfp813-ps	protein_coding	1.57625	0.0358365
ENSMUSG00000022139,12	Mbnl2	protein_coding	1.57599	0.0212027
ENSMUSG00000086735,1	Gm13977	antisense	1.57557	0.0211456
ENSMUSG00000104436,1	RP23-114L12,3	processed_transcript	1.57443	0.0164238
ENSMUSG00000026103,10	Gls	protein_coding	1.57428	4.82629e-05
ENSMUSG00000097354,3	2310001H17Rik	lincRNA	1.57263	0.0114199
ENSMUSG00000059179,5	Gm8991	protein_coding	1.57176	0.0212149
ENSMUSG00000089926,1	Gm15734	processed_transcript	1.57138	0.045019
ENSMUSG00000085222,1	Gm13974	lincRNA	1.57023	0.0406544
ENSMUSG00000045824,5	Olfr574	protein_coding	1.56956	0.0429173
ENSMUSG00000067229,3	Cyp2c66	protein_coding	1.56892	0.00429807
ENSMUSG00000041997,12	Tlk1	protein_coding	1.56831	0.000716113
ENSMUSG00000052748,10	Swt1	protein_coding	1.56748	0.000213752
ENSMUSG00000025004,11	Cyp2c40	protein_coding	1.56741	0.021537
ENSMUSG00000071340,1	Trappc3l	protein_coding	1.56732	0.0452504
ENSMUSG00000020664,9	Dld	protein_coding	1.56718	0.032662
ENSMUSG00000064329,9	Scn1a	protein_coding	1.56558	0.000623987
ENSMUSG00000038725,7	Pkhd1l1	protein_coding	1.5653	2.20526e-05
ENSMUSG00000019761,9	Krt10	protein_coding	1.56504	0.0403497
ENSMUSG00000032475,11	Nck1	protein_coding	1.56488	0.00913281
ENSMUSG00000063623,2	C230062I16Rik	protein_coding	1.56453	0.0371088
ENSMUSG00000016998,2	Svs4	protein_coding	1.56449	0.0449055
ENSMUSG00000056031,9	9330154J02Rik	processed_transcript	1.56434	0.0387395
ENSMUSG00000028883,13	Sema3a	protein_coding	1.56331	0.000225188
ENSMUSG00000026650,11	Meig1	protein_coding	1.56311	0.0145452
ENSMUSG00000094787,2	Ighv1-54	IG_V_gene	1.56162	0.0418622
ENSMUSG00000048766,6	Skint10	protein_coding	1.56031	0.0386081
ENSMUSG00000085162,3	Gm12295	lincRNA	1.55942	0.00547574
ENSMUSG00000043065,8	Spice1	protein_coding	1.55935	0.00295821
ENSMUSG00000037849,7	Gm4955	protein_coding	1.55874	0.0440954
ENSMUSG00000003452,11	Bicd1	protein_coding	1.55779	0.000379066
ENSMUSG00000051444,9	Bbs12	protein_coding	1.55753	0.0466035
ENSMUSG00000045613,5	Chrm2	protein_coding	1.55644	0.0267777
ENSMUSG00000030237,10	Slco1a4	protein_coding	1.55589	0.0274247
ENSMUSG00000091923,3	Gm8267	protein_coding	1.55577	0.0491477
ENSMUSG00000103126,1	RP23-12D3,3	TEC	1.5552	0.0285744
ENSMUSG00000070605,4	Gm13251	protein_coding	1.55513	0.00822044
ENSMUSG00000031232,12	Magt1	protein_coding	1.55398	0.0251311
ENSMUSG00000096354,1	Gm8178	processed_pseudogene	1.55397	0.00411826
ENSMUSG00000063108,10	Zfp26	protein_coding	1.55381	0.00163922
ENSMUSG00000027787,10	Nmd3	protein_coding	1.55346	0.00128931
ENSMUSG00000027109,12	Sp3	protein_coding	1.55338	0.00754805
ENSMUSG00000026734,9	4921504E06Rik	protein_coding	1.55181	0.0345889
ENSMUSG00000086392,5	Mccc1os	antisense	1.55094	0.0148956
ENSMUSG00000040969,10	Arhgef38	protein_coding	1.5502	0.00304696
ENSMUSG00000057182,10	Scn3a	protein_coding	1.5488	9.75392e-05
ENSMUSG00000102659,1	RP23-184I13,3	TEC	1.54812	0.0312591
ENSMUSG00000028132,11	Tmem56	protein_coding	1.54687	0.00363284
ENSMUSG00000049334,2	Olfr902	protein_coding	1.5467	0.0493085
ENSMUSG00000007908,10	Hmgcll1	protein_coding	1.54571	0.0270382
ENSMUSG00000075249,8	Fsip2	protein_coding	1.54526	0.000115263
ENSMUSG00000057997,3	Olfr541	protein_coding	1.5451	0.0499394
ENSMUSG00000052783,12	Grk4	protein_coding	1.5447	0.00103535
ENSMUSG00000043929,12	Klhl15	protein_coding	1.54403	0.00218601
ENSMUSG00000033237,14	Arid2	protein_coding	1.54367	0.00091344
ENSMUSG00000047094,8	Ofcc1	protein_coding	1.54329	0.00967223
ENSMUSG00000023737,9	1700082M22Rik	antisense	1.54288	0.0390174
ENSMUSG00000062310,7	Glrp1	protein_coding	1.54223	0.0464311
ENSMUSG00000067001,7	Serpinb7	protein_coding	1.5422	0.0305884
ENSMUSG00000021098,10	4930447C04Rik	protein_coding	1.54154	0.00502622
ENSMUSG00000085386,1	Gm13630	processed_transcript	1.54102	0.0196328
ENSMUSG00000032253,9	Phip	protein_coding	1.54056	1.65873e-05
ENSMUSG00000091523,1	AU040972	antisense	1.53997	0.0266333
ENSMUSG00000072511,2	Hhla1	protein_coding	1.53861	0.00610753
ENSMUSG00000033569,13	Bai3	protein_coding	1.53852	0.000148139
ENSMUSG00000026003,5	Acadl	protein_coding	1.53731	0.0149057
ENSMUSG00000051900,8	Abca16	protein_coding	1.53703	0.00342809
ENSMUSG00000041153,5	Osgin2	protein_coding	1.53583	0.00537699
ENSMUSG00000038225,10	Primpol	protein_coding	1.53388	0.000168177
ENSMUSG00000043943,10	Naalad2	protein_coding	1.53356	0.00118078
ENSMUSG00000079162,4	Trim43b	protein_coding	1.53322	0.0235216
ENSMUSG00000027018,7	Hat1	protein_coding	1.53285	0.0149442
ENSMUSG00000078934,4	9230113P08Rik	protein_coding	1.53168	0.0180284
ENSMUSG00000102436,1	RP24-86C19,3	TEC	1.53116	0.0199389
ENSMUSG00000097759,1	Gm26753	lincRNA	1.53113	0.0103764
ENSMUSG00000026150,10	Mff	protein_coding	1.5309	0.00115926
ENSMUSG00000097777,3	Gm16794	antisense	1.53061	0.0253366
ENSMUSG00000020461,5	Clhc1	protein_coding	1.53013	0.0436992
ENSMUSG00000061171,11	Slc38a11	protein_coding	1.52978	0.0167865
ENSMUSG00000070841,4	Vmn2r34	protein_coding	1.52918	0.0321524
ENSMUSG00000079108,5	Srp54b	protein_coding	1.52864	0.00684003
ENSMUSG00000022857,9	Tmprss15	protein_coding	1.52766	0.0221342
ENSMUSG00000060534,11	Dcc	protein_coding	1.52745	0.00234555
ENSMUSG00000036810,12	Cnep1r1	protein_coding	1.52743	0.0498972
ENSMUSG00000032320,7	Rcn2	protein_coding	1.52707	0.00949833
ENSMUSG00000104291,1	RP23-361M12,2	TEC	1.52685	0.00769258
ENSMUSG00000100910,1	Gm29128	antisense	1.5239	0.0169751
ENSMUSG00000064115,9	Cadm2	protein_coding	1.52335	0.0190907
ENSMUSG00000086848,3	Lce6a	protein_coding	1.5233	0.0427492
ENSMUSG00000022858,11	Tra2b	protein_coding	1.52323	0.0141078
ENSMUSG00000083378,3	Gm13196	processed_pseudogene	1.52284	0.0434149
ENSMUSG00000060988,8	Galnt13	protein_coding	1.5227	0.00356905
ENSMUSG00000045930,2	Clec14a	protein_coding	1.52212	0.00334165
ENSMUSG00000098030,1	Gm6771	processed_pseudogene	1.52149	0.0427175
ENSMUSG00000103291,1	RP24-92A2,1	TEC	1.52135	0.00425667
ENSMUSG00000027722,10	Spata5	protein_coding	1.521	0.0150497
ENSMUSG00000055022,10	Cntn1	protein_coding	1.52049	0.000466811
ENSMUSG00000026743,12	Mllt10	protein_coding	1.52036	0.0006787
ENSMUSG00000024810,12	Il33	protein_coding	1.51995	0.00633345
ENSMUSG00000001865,2	Cpa3	protein_coding	1.51982	0.0365746
ENSMUSG00000056531,7	Ccdc18	protein_coding	1.51981	0.00319636
ENSMUSG00000028549,13	Itgb3bp	protein_coding	1.51979	0.0481696
ENSMUSG00000044176,7	Spink10	protein_coding	1.51973	0.0400808
ENSMUSG00000026319,9	2310035C23Rik	protein_coding	1.51901	0.000720382
ENSMUSG00000103739,1	RP24-188H2,5	TEC	1.5177	0.0170288
ENSMUSG00000102133,1	RP23-268A12,2	TEC	1.51663	0.0268761
ENSMUSG00000034362,7	Csta1	protein_coding	1.51557	0.0496758
ENSMUSG00000099032,2	Tcf24	protein_coding	1.5154	0.0437294
ENSMUSG00000035933,4	Cog5	protein_coding	1.5148	0.0123963
ENSMUSG00000025245,9	Lztfl1	protein_coding	1.5126	0.000369441
ENSMUSG00000021027,11	Ralgapa1	protein_coding	1.51054	0.000903887
ENSMUSG00000028134,7	Ptbp2	protein_coding	1.50931	0.0172264
ENSMUSG00000070501,9	BC094916	protein_coding	1.50786	0.00163097
ENSMUSG00000027763,9	Mbnl1	protein_coding	1.50747	0.000464577
ENSMUSG00000022309,8	Angpt1	protein_coding	1.50568	0.00621748
ENSMUSG00000093716,1	Gm19815	processed_pseudogene	1.5055	0.0261031
ENSMUSG00000097407,1	4933408J17Rik	protein_coding	1.50515	0.0485705
ENSMUSG00000086646,3	5133400J02Rik	lincRNA	1.50508	0.0447048
ENSMUSG00000021816,6	Ppp3cb	protein_coding	1.50492	0.0253066
ENSMUSG00000025982,9	Sf3b1	protein_coding	1.50318	0.000252751
ENSMUSG00000029735,13	Tpk1	protein_coding	1.50279	0.0268773
ENSMUSG00000046282,7	Adam20	protein_coding	1.50185	0.0255183
ENSMUSG00000103821,1	RP24-147G7,2	TEC	1.50156	0.0373051
ENSMUSG00000104132,1	RP23-184I13,5	TEC	1.50089	0.00703707
ENSMUSG00000064299,5	4921528I07Rik	protein_coding	1.50084	0.0270126
ENSMUSG00000033737,10	Fndc3c1	protein_coding	1.50067	0.0223308
ENSMUSG00000020130,8	Tbc1d15	protein_coding	1.50028	0.00265975
ENSMUSG00000084966,1	2810471M01Rik	lincRNA	1.50021	0.046494
ENSMUSG00000052516,13	Robo2	protein_coding	1.49972	0.000761353
ENSMUSG00000022960,8	Donson	protein_coding	1.49925	0.0298137
ENSMUSG00000024109,14	Nrxn1	protein_coding	1.49767	0.000237988
ENSMUSG00000038836,11	Agbl3	protein_coding	1.49687	0.000657686
ENSMUSG00000021712,10	Trim23	protein_coding	1.49659	0.022146
ENSMUSG00000038257,8	Glra3	protein_coding	1.49624	0.0131179
ENSMUSG00000005649,13	Cabp5	protein_coding	1.49472	0.0176384
ENSMUSG00000037857,12	Nufip2	protein_coding	1.49437	0.0136053
ENSMUSG00000079509,6	Zfx	protein_coding	1.49394	0.00972955
ENSMUSG00000022783,7	Spag6	protein_coding	1.49366	0.024492
ENSMUSG00000101856,1	1700096K18Rik	lincRNA	1.49318	0.0363973
ENSMUSG00000031521,4	Aga	protein_coding	1.49301	0.0266974
ENSMUSG00000032134,6	Muc16	protein_coding	1.49175	0.0181227
ENSMUSG00000104104,1	RP24-328M23,2	TEC	1.49135	0.0433124
ENSMUSG00000032113,11	Chek1	protein_coding	1.49121	0.00027726
ENSMUSG00000021147,12	Wdr37	protein_coding	1.49112	0.00364143
ENSMUSG00000031189,8	Aff2	protein_coding	1.48997	0.0434313
ENSMUSG00000098206,1	A430106G13Rik	lincRNA	1.48974	0.0461328
ENSMUSG00000042895,5	Abra	protein_coding	1.48926	0.0230923
ENSMUSG00000028262,9	Clca2	protein_coding	1.48911	0.0303061
ENSMUSG00000028718,12	Stil	protein_coding	1.48714	0.0122827
ENSMUSG00000020332,7	4930404A10Rik	protein_coding	1.48686	0.0448984
ENSMUSG00000051486,5	Pcdhb11	protein_coding	1.48568	0.040641
ENSMUSG00000068794,6	Col28a1	protein_coding	1.48546	0.00315345
ENSMUSG00000028080,11	Lrba	protein_coding	1.48515	8.25748e-05
ENSMUSG00000062593,11	Lilrb4	protein_coding	1.48474	0.0453637
ENSMUSG00000102581,1	RP24-324H23,2	TEC	1.48459	0.0297968
ENSMUSG00000000600,11	Krit1	protein_coding	1.48443	0.00528806
ENSMUSG00000018548,11	Trim37	protein_coding	1.48383	0.00100423
ENSMUSG00000035623,10	Rsf1	protein_coding	1.48353	9.65189e-05
ENSMUSG00000052075,6	1700029F12Rik	protein_coding	1.48345	0.0307545
ENSMUSG00000038048,7	Cntnap5c	protein_coding	1.48276	0.0060382
ENSMUSG00000050395,8	Tnfsf15	protein_coding	1.48269	0.0447615
ENSMUSG00000050192,8	Eif5a2	protein_coding	1.48257	0.0389669
ENSMUSG00000071551,8	Akr1c19	protein_coding	1.48203	0.0239504
ENSMUSG00000030960,12	Mettl10	protein_coding	1.48116	0.0466622
ENSMUSG00000045103,13	Dmd	protein_coding	1.48042	0.000177414
ENSMUSG00000031517,7	Gpm6a	protein_coding	1.48034	0.00518316
ENSMUSG00000034098,10	Fstl5	protein_coding	1.47986	0.0271372
ENSMUSG00000040429,5	Mterf1a	protein_coding	1.47892	0.0148978
ENSMUSG00000025907,10	Rb1cc1	protein_coding	1.4786	0.000269882
ENSMUSG00000092008,1	Cyp2c69	protein_coding	1.47856	0.0425621
ENSMUSG00000025905,9	Oprk1	protein_coding	1.47848	0.00776563
ENSMUSG00000101724,1	Gm29453	sense_intronic	1.47819	0.0397078
ENSMUSG00000070704,6	Ugt2b36	protein_coding	1.4781	0.0404659
ENSMUSG00000102676,1	RP23-346B12,4	TEC	1.47788	0.0207484
ENSMUSG00000096872,2	Scgb2a2	protein_coding	1.47706	0.0208688
ENSMUSG00000009628,10	Tex15	protein_coding	1.47703	0.000250441
ENSMUSG00000064090,10	Vrk2	protein_coding	1.4762	0.00295821
ENSMUSG00000026723,6	Trdmt1	protein_coding	1.47619	0.0204482
ENSMUSG00000026035,11	Ppil3	protein_coding	1.47617	0.0136841
ENSMUSG00000025900,6	Rp1	protein_coding	1.47536	0.00337542
ENSMUSG00000061136,9	Prpf40a	protein_coding	1.47447	0.000368797
ENSMUSG00000057335,7	Cep170	protein_coding	1.47436	6.18582e-05
ENSMUSG00000023186,10	Vwa5a	protein_coding	1.47377	0.000178954
ENSMUSG00000041247,7	Lamp3	protein_coding	1.47222	0.0210816
ENSMUSG00000037533,13	Rapgef6	protein_coding	1.47201	7.19418e-05
ENSMUSG00000022788,12	Fgd4	protein_coding	1.47108	0.00020371
ENSMUSG00000032937,4	Fshr	protein_coding	1.46979	0.0237605
ENSMUSG00000032940,12	Rbm11	protein_coding	1.46934	0.0306824
ENSMUSG00000000266,7	Mid2	protein_coding	1.46763	0.0235364
ENSMUSG00000054752,12	Fsd1l	protein_coding	1.46745	0.00637931
ENSMUSG00000028240,2	Cyp7a1	protein_coding	1.46668	0.0118292
ENSMUSG00000060508,11	Nlrp9b	protein_coding	1.46595	0.0120997
ENSMUSG00000024887,9	Asah2	protein_coding	1.46591	0.00031933
ENSMUSG00000033981,10	Gria2	protein_coding	1.4652	0.0018703
ENSMUSG00000028553,8	Angptl3	protein_coding	1.46383	0.0177252
ENSMUSG00000025262,8	Fam120c	protein_coding	1.46172	0.0324287
ENSMUSG00000024097,10	Srsf7	protein_coding	1.46159	0.0291755
ENSMUSG00000063063,8	Ctnna2	protein_coding	1.45985	0.00524619
ENSMUSG00000045519,10	Zfp560	protein_coding	1.45982	0.0079892
ENSMUSG00000085924,1	Gm8980	unprocessed_pseudogene	1.45854	0.0386381
ENSMUSG00000057440,7	Mpp7	protein_coding	1.4581	0.0195815
ENSMUSG00000078497,5	Gm13145	protein_coding	1.45786	0.00907971
ENSMUSG00000097028,2	Ptgs2os	processed_transcript	1.45608	0.00298372
ENSMUSG00000024383,8	Map3k2	protein_coding	1.45608	0.00713178
ENSMUSG00000027087,7	Itgav	protein_coding	1.45578	0.000649292
ENSMUSG00000025104,9	Hdgfrp3	protein_coding	1.45549	0.00646239
ENSMUSG00000026245,12	Farsb	protein_coding	1.45474	0.00227083
ENSMUSG00000102317,1	RP23-478K4,1	TEC	1.45379	0.00453725
ENSMUSG00000026560,9	Fmo9	protein_coding	1.45378	0.0163849
ENSMUSG00000103937,1	RP23-414A20,3	TEC	1.45343	0.0349766
ENSMUSG00000027080,6	Med19	protein_coding	1.45321	0.0327177
ENSMUSG00000097609,1	Gm26659	lincRNA	1.45303	0.0163765
ENSMUSG00000103094,1	RP23-46L5,1	TEC	1.45265	0.0374034
ENSMUSG00000020561,7	Twistnb	protein_coding	1.45263	0.0294784
ENSMUSG00000026585,9	Kifap3	protein_coding	1.45248	0.00345841
ENSMUSG00000086657,2	Stamos	processed_transcript	1.45126	0.0254008
ENSMUSG00000053641,8	Dennd4a	protein_coding	1.45057	0.000177662
ENSMUSG00000026775,5	Yme1l1	protein_coding	1.44903	0.000763312
ENSMUSG00000029088,12	Kcnip4	protein_coding	1.44894	0.0333238
ENSMUSG00000047554,9	Tmem41b	protein_coding	1.4473	0.00720385
ENSMUSG00000103553,1	RP24-429G21,7	TEC	1.44615	0.017867
ENSMUSG00000070702,5	Csn1s1	protein_coding	1.44519	0.0182917
ENSMUSG00000021072,8	Tmx1	protein_coding	1.44502	0.0131035
ENSMUSG00000024975,8	Pdcd4	protein_coding	1.44234	0.00413438
ENSMUSG00000026771,10	Spopl	protein_coding	1.44224	0.00155708
ENSMUSG00000072664,6	Ugt3a1	protein_coding	1.44204	0.00441123
ENSMUSG00000026235,10	Epha4	protein_coding	1.44182	0.000635864
ENSMUSG00000035476,5	Tab3	protein_coding	1.44171	0.020107
ENSMUSG00000008892,7	Vdac3	protein_coding	1.44112	0.0245223
ENSMUSG00000081974,3	Gm11960	transcribed_processed_pseudogene	1.44109	0.0230702
ENSMUSG00000037922,9	Bank1	protein_coding	1.44096	0.0129757
ENSMUSG00000044308,13	Ubr3	protein_coding	1.4403	0.00189891
ENSMUSG00000082661,1	Gm11590	processed_pseudogene	1.43961	0.039604
ENSMUSG00000051166,9	Eml5	protein_coding	1.43878	0.00031933
ENSMUSG00000046785,7	Epm2aip1	protein_coding	1.43739	0.00132348
ENSMUSG00000042348,9	Arl15	protein_coding	1.43707	0.0197109
ENSMUSG00000092239,1	1700031A10Rik	antisense	1.43644	0.0469631
ENSMUSG00000018068,9	Ints2	protein_coding	1.43606	0.00014385
ENSMUSG00000037033,9	Clca4	protein_coding	1.43497	0.0367527
ENSMUSG00000020128,11	Vps54	protein_coding	1.43382	0.00063382
ENSMUSG00000004591,12	Pkn2	protein_coding	1.43327	0.0052268
ENSMUSG00000054178,1	Gm9938	protein_coding	1.43274	0.039923
ENSMUSG00000027620,12	Rbm39	protein_coding	1.43219	0.00252313
ENSMUSG00000037818,12	3110057O12Rik	protein_coding	1.43156	0.0209797
ENSMUSG00000031262,8	Cenpi	protein_coding	1.43119	0.0349754
ENSMUSG00000096130,1	Gm25144	miRNA	1.43086	0.041364
ENSMUSG00000052726,11	Kcnt2	protein_coding	1.43074	0.00974892
ENSMUSG00000026368,6	F13b	protein_coding	1.43007	0.0298321
ENSMUSG00000102383,1	RP23-26I10,2	TEC	1.42999	0.00417136
ENSMUSG00000087461,2	C230014O12Rik	lincRNA	1.42912	0.021537
ENSMUSG00000102926,1	RP23-144E24,1	TEC	1.42899	0.0317259
ENSMUSG00000041328,11	Pcf11	protein_coding	1.42695	0.0030824
ENSMUSG00000019936,6	Epyc	protein_coding	1.42665	0.0233987
ENSMUSG00000024070,11	Prkd3	protein_coding	1.42661	0.000135755
ENSMUSG00000069206,9	Zfp874a	protein_coding	1.42633	0.0365051
ENSMUSG00000018481,9	Appbp2	protein_coding	1.42631	0.0327367
ENSMUSG00000044976,12	Wdr72	protein_coding	1.4262	0.00193917
ENSMUSG00000028780,9	Sema3c	protein_coding	1.42601	0.00718634
ENSMUSG00000038147,9	Cd84	protein_coding	1.4259	0.00160094
ENSMUSG00000040254,7	Sema3d	protein_coding	1.42578	0.0073818
ENSMUSG00000025246,9	Tbl1x	protein_coding	1.42553	0.022682
ENSMUSG00000020462,10	Cfap36	protein_coding	1.42544	0.014201
ENSMUSG00000000804,10	Usp32	protein_coding	1.42514	0.0004488
ENSMUSG00000020521,7	Rnft1	protein_coding	1.42486	0.0249081
ENSMUSG00000026141,9	Col19a1	protein_coding	1.42424	0.001176
ENSMUSG00000067916,5	Gm13139	protein_coding	1.42336	0.0459586
ENSMUSG00000054061,8	Gm9934	lincRNA	1.42284	0.034323
ENSMUSG00000022641,11	Bbx	protein_coding	1.42283	9.9715e-05
ENSMUSG00000036977,7	Anapc10	protein_coding	1.42122	0.017946
ENSMUSG00000027782,6	Kpna4	protein_coding	1.4194	0.00308592
ENSMUSG00000026748,9	Plxdc2	protein_coding	1.41787	0.00176625
ENSMUSG00000032409,10	Atr	protein_coding	1.4156	0.00013222
ENSMUSG00000029238,8	Clock	protein_coding	1.41533	0.0032074
ENSMUSG00000072845,2	Tmprss11a	protein_coding	1.41492	0.0253001
ENSMUSG00000035133,8	Arhgap5	protein_coding	1.4147	0.0192152
ENSMUSG00000074968,7	Ano3	protein_coding	1.41415	0.00543154
ENSMUSG00000026034,13	Clk1	protein_coding	1.4141	0.00148579
ENSMUSG00000034552,4	Zswim2	protein_coding	1.41108	0.0426407
ENSMUSG00000029321,1	Slc10a6	protein_coding	1.4103	0.0425736
ENSMUSG00000026761,8	Orc4	protein_coding	1.41028	0.00792341
ENSMUSG00000090935,6	Synj2bp	protein_coding	1.40975	0.0161367
ENSMUSG00000089828,1	Gm16300	processed_pseudogene	1.40965	0.049894
ENSMUSG00000022789,10	Dnm1l	protein_coding	1.40957	0.0177182
ENSMUSG00000029221,11	Slc30a9	protein_coding	1.40898	0.00148579
ENSMUSG00000059588,9	Calcrl	protein_coding	1.4088	0.00411826
ENSMUSG00000028409,7	Smu1	protein_coding	1.40719	0.0242351
ENSMUSG00000090386,5	Mir99ahg	processed_transcript	1.40698	0.00159994
ENSMUSG00000027248,9	Pdia3	protein_coding	1.40678	0.0188815
ENSMUSG00000026017,9	Carf	protein_coding	1.40656	0.000232082
ENSMUSG00000037826,3	Ppm1k	protein_coding	1.40353	0.0156435
ENSMUSG00000104130,1	RP24-113A5,1	TEC	1.40315	0.0171295
ENSMUSG00000041303,7	Gtf3c3	protein_coding	1.40201	0.00610239
ENSMUSG00000075210,3	Olfr1012	protein_coding	1.39994	0.0487081
ENSMUSG00000029563,12	Foxp2	protein_coding	1.39979	0.000846544
ENSMUSG00000027206,9	Cops2	protein_coding	1.39853	0.0417637
ENSMUSG00000021974,10	Fgf9	protein_coding	1.39826	0.0411146
ENSMUSG00000004360,8	9330159F19Rik	protein_coding	1.39805	0.0104038
ENSMUSG00000096141,2	Dnah7a	protein_coding	1.39716	8.29043e-05
ENSMUSG00000025925,10	Terf1	protein_coding	1.39616	0.0411146
ENSMUSG00000000606,11	Vmn2r88	protein_coding	1.39573	0.0434149
ENSMUSG00000075070,6	4932412D23Rik	processed_transcript	1.39463	0.00729508
ENSMUSG00000062991,6	Nrg1	protein_coding	1.39461	0.0197641
ENSMUSG00000027959,9	Sass6	protein_coding	1.39398	0.0413438
ENSMUSG00000097781,1	9330136K24Rik	lincRNA	1.39393	0.0389545
ENSMUSG00000032551,6	1110059G10Rik	protein_coding	1.39389	0.0453166
ENSMUSG00000101013,1	A630072M18Rik	antisense	1.39276	0.0171733
ENSMUSG00000034761,11	Map4k5	protein_coding	1.3927	0.00189891
ENSMUSG00000100786,1	Gm28940	antisense	1.3917	0.0499886
ENSMUSG00000085851,1	4921518K17Rik	antisense	1.39133	0.0316547
ENSMUSG00000028256,12	Odf2l	protein_coding	1.39084	0.036663
ENSMUSG00000079698,5	Vmn2r93	protein_coding	1.39064	0.0418749
ENSMUSG00000073664,7	Nbeal1	protein_coding	1.39063	0.000146422
ENSMUSG00000021936,9	Mapk8	protein_coding	1.39038	0.0073818
ENSMUSG00000074207,6	Adh1	protein_coding	1.38995	0.0227591
ENSMUSG00000031673,5	Cdh11	protein_coding	1.38933	0.0103709
ENSMUSG00000027778,11	Ift80	protein_coding	1.38819	0.000614922
ENSMUSG00000104281,1	RP23-264F2,2	TEC	1.38793	0.0494953
ENSMUSG00000032384,11	Csnk1g1	protein_coding	1.38619	0.000224685
ENSMUSG00000012535,10	Tnpo3	protein_coding	1.38613	0.000808166
ENSMUSG00000063626,5	Unc5d	protein_coding	1.38579	0.00235335
ENSMUSG00000090326,1	Dthd1	protein_coding	1.38535	0.0472533
ENSMUSG00000026064,11	Ptp4a1	protein_coding	1.38533	0.0129743
ENSMUSG00000044098,10	Rsbn1	protein_coding	1.38495	0.0199014
ENSMUSG00000040729,6	AK129341	protein_coding	1.38323	0.0378498
ENSMUSG00000067276,5	Capn6	protein_coding	1.38305	0.027724
ENSMUSG00000028173,6	Wls	protein_coding	1.38293	0.0261471
ENSMUSG00000034401,12	Spata6	protein_coding	1.38032	0.0126283
ENSMUSG00000020719,10	Ddx5	protein_coding	1.38027	0.00445464
ENSMUSG00000026784,10	Pdss1	protein_coding	1.3797	0.00639069
ENSMUSG00000010461,10	Eya4	protein_coding	1.37935	0.00558466
ENSMUSG00000104324,1	RP23-61D6,3	TEC	1.37852	0.00116853
ENSMUSG00000022008,3	Gpalpp1	protein_coding	1.37827	0.0190693
ENSMUSG00000039092,5	Sptlc3	protein_coding	1.37627	0.0140352
ENSMUSG00000061928,6	Dsg1b	protein_coding	1.37609	0.0267777
ENSMUSG00000029916,8	Agk	protein_coding	1.37532	0.0346268
ENSMUSG00000029211,7	Gabra4	protein_coding	1.37518	0.0240893
ENSMUSG00000085125,3	Gm16070	antisense	1.37511	0.0171723
ENSMUSG00000024677,9	Ms4a6b	protein_coding	1.37486	0.00854473
ENSMUSG00000045210,8	Vcpip1	protein_coding	1.3747	0.0016771
ENSMUSG00000028016,8	Ints12	protein_coding	1.37156	0.0250644
ENSMUSG00000070690,4	5830473C10Rik	protein_coding	1.37138	0.0353978
ENSMUSG00000019726,10	Lyst	protein_coding	1.37109	0.000300289
ENSMUSG00000047126,13	Cltc	protein_coding	1.37107	0.000609098
ENSMUSG00000027208,10	Fgf7	protein_coding	1.37062	0.0350954
ENSMUSG00000029676,11	Pot1a	protein_coding	1.36954	0.00555359
ENSMUSG00000027809,10	Etfdh	protein_coding	1.36904	0.0120371
ENSMUSG00000021733,9	Slc4a7	protein_coding	1.36879	0.0136648
ENSMUSG00000073647,3	Gm10557	pseudogene	1.36864	0.0151333
ENSMUSG00000005897,10	Nr2c1	protein_coding	1.36793	0.00648567
ENSMUSG00000099025,1	Gm27162	lincRNA	1.36744	0.0038251
ENSMUSG00000044322,6	Dsc1	protein_coding	1.36595	0.0301874
ENSMUSG00000015757,6	Ppil4	protein_coding	1.3654	0.00529257
ENSMUSG00000104283,1	RP24-324H23,3	antisense	1.36447	0.0452907
ENSMUSG00000041229,11	Phf8	protein_coding	1.36446	0.00442838
ENSMUSG00000050102,5	Vmn1r235	protein_coding	1.36397	0.0333291
ENSMUSG00000022141,6	Nipbl	protein_coding	1.3636	0.000103865
ENSMUSG00000027104,14	Atf2	protein_coding	1.36057	0.0111002
ENSMUSG00000053286,7	Trmt1l	protein_coding	1.36048	0.00161416
ENSMUSG00000102858,1	RP23-390I1,6	TEC	1.36032	0.0444126
ENSMUSG00000040760,6	Appl1	protein_coding	1.35916	0.00719968
ENSMUSG00000090112,4	Shprh	protein_coding	1.35893	0.000501362
ENSMUSG00000090031,2	4732440D04Rik	antisense	1.35878	0.0233663
ENSMUSG00000033157,12	Abhd10	protein_coding	1.35851	0.0428826
ENSMUSG00000020214,6	Glipr1l2	protein_coding	1.3583	0.0312867
ENSMUSG00000040329,10	Il7	protein_coding	1.35793	0.0421394
ENSMUSG00000039361,9	Picalm	protein_coding	1.3578	0.0161367
ENSMUSG00000103569,1	RP24-325N3,3	TEC	1.35705	0.0314896
ENSMUSG00000026405,10	C4bp	protein_coding	1.35698	0.0021665
ENSMUSG00000032047,5	Acat1	protein_coding	1.35651	0.0213103
ENSMUSG00000035151,8	Elmod2	protein_coding	1.35651	0.000842086
ENSMUSG00000033632,11	AW554918	protein_coding	1.35584	0.00807246
ENSMUSG00000039031,11	Arhgap18	protein_coding	1.35563	0.00552009
ENSMUSG00000097393,3	D030068K23Rik	lincRNA	1.35476	0.00202132
ENSMUSG00000074749,6	Kiz	protein_coding	1.3539	0.0395375
ENSMUSG00000032712,12	2810474O19Rik	protein_coding	1.35317	0.0201888
ENSMUSG00000030148,11	Clec4a2	protein_coding	1.3529	0.0347099
ENSMUSG00000047014,6	Catsperb	protein_coding	1.35283	0.033051
ENSMUSG00000034973,12	Dopey1	protein_coding	1.35216	0.000965657
ENSMUSG00000013662,5	Atad1	protein_coding	1.35108	0.0187595
ENSMUSG00000001986,12	Gria3	protein_coding	1.3502	0.0430946
ENSMUSG00000023066,9	Rttn	protein_coding	1.34952	0.0109328
ENSMUSG00000085301,1	Gm12132	lincRNA	1.34907	0.0372434
ENSMUSG00000028212,12	Ccne2	protein_coding	1.34762	0.0177182
ENSMUSG00000063380,2	Olfr945	protein_coding	1.34696	0.0300997
ENSMUSG00000081362,3	Cyp2j7	protein_coding	1.34682	0.0455949
ENSMUSG00000062470,9	Fbxl12os	antisense	1.34597	0.0352472
ENSMUSG00000103851,1	RP23-65G17,3	TEC	1.34589	0.0349351
ENSMUSG00000021706,10	Zfyve16	protein_coding	1.34498	0.00961688
ENSMUSG00000032374,10	Plod2	protein_coding	1.34441	0.0172264
ENSMUSG00000040649,11	Rimklb	protein_coding	1.34389	0.024492
ENSMUSG00000066000,8	2610305D13Rik	protein_coding	1.34318	0.00205045
ENSMUSG00000094588,1	Olfr898	protein_coding	1.34257	0.0499886
ENSMUSG00000048186,10	Bend7	protein_coding	1.34251	0.0101719
ENSMUSG00000035798,9	Zdhhc17	protein_coding	1.3412	0.0256644
ENSMUSG00000056870,5	Gulp1	protein_coding	1.34071	0.0345889
ENSMUSG00000029169,7	Dhx15	protein_coding	1.34058	0.0144589
ENSMUSG00000100444,1	C530043A13Rik	lincRNA	1.34011	0.0327177
ENSMUSG00000091277,1	Gm1818	protein_coding	1.3398	0.0237605
ENSMUSG00000052572,11	Dlg2	protein_coding	1.3381	0.000984433
ENSMUSG00000097797,2	Gm26901	lincRNA	1.33641	0.0353379
ENSMUSG00000047562,2	Mmp10	protein_coding	1.33617	0.0335909
ENSMUSG00000022205,11	Sub1	protein_coding	1.33479	0.00495824
ENSMUSG00000063760,9	Rnf217	protein_coding	1.33428	0.00536209
ENSMUSG00000036960,6	Clca5	protein_coding	1.33389	0.0164238
ENSMUSG00000029253,8	Cenpc1	protein_coding	1.33374	0.0449963
ENSMUSG00000052917,10	Senp7	protein_coding	1.3336	0.00482739
ENSMUSG00000070686,6	C87414	protein_coding	1.33305	0.0203699
ENSMUSG00000028248,11	Pnisr	protein_coding	1.33284	0.00495824
ENSMUSG00000032235,11	Ice2	protein_coding	1.33247	0.0167307
ENSMUSG00000026109,10	Tmeff2	protein_coding	1.33245	0.00431513
ENSMUSG00000021770,6	Samd8	protein_coding	1.33148	0.00835137
ENSMUSG00000055660,8	Mettl4	protein_coding	1.33121	0.0373051
ENSMUSG00000039007,9	Cpq	protein_coding	1.33106	0.0419728
ENSMUSG00000027665,9	Pik3ca	protein_coding	1.33006	0.00911425
ENSMUSG00000075376,6	Rc3h2	protein_coding	1.32943	0.00211304
ENSMUSG00000031635,9	Anxa10	protein_coding	1.32897	0.0441567
ENSMUSG00000067919,8	Rex2	protein_coding	1.32862	0.0178523
ENSMUSG00000058624,8	Gda	protein_coding	1.32809	0.00274109
ENSMUSG00000029655,13	N4bp2l2	protein_coding	1.32595	0.00508953
ENSMUSG00000056211,9	R3hdm1	protein_coding	1.32589	0.000151558
ENSMUSG00000099930,1	Gm2396	processed_transcript	1.32503	0.00872132
ENSMUSG00000060510,9	Zfp266	protein_coding	1.32491	0.0415607
ENSMUSG00000032582,10	Rbm6	protein_coding	1.32467	0.000241161
ENSMUSG00000049252,13	Lrp1b	protein_coding	1.32418	0.000167776
ENSMUSG00000093482,4	Gm20619	lincRNA	1.32386	0.0344327
ENSMUSG00000062822,7	4833420G17Rik	protein_coding	1.3236	0.0438844
ENSMUSG00000050296,10	Abca12	protein_coding	1.32353	0.00014234
ENSMUSG00000022300,9	Dcaf13	protein_coding	1.32321	0.0184032
ENSMUSG00000075318,8	Scn2a1	protein_coding	1.3232	0.00373906
ENSMUSG00000019966,13	Kitl	protein_coding	1.32279	0.0196791
ENSMUSG00000024228,8	Nudt12	protein_coding	1.32246	0.0404347
ENSMUSG00000000568,11	Hnrnpd	protein_coding	1.32107	0.0190903
ENSMUSG00000030228,11	Pik3c2g	protein_coding	1.32104	0.000904478
ENSMUSG00000038975,10	Rabggtb	protein_coding	1.321	0.0468406
ENSMUSG00000022636,9	Alcam	protein_coding	1.3208	0.00170201
ENSMUSG00000026834,9	Acvr1c	protein_coding	1.31888	0.00365551
ENSMUSG00000019232,10	Etnppl	protein_coding	1.31856	0.0422433
ENSMUSG00000033943,11	Mga	protein_coding	1.318	0.0003992
ENSMUSG00000022672,8	Prkdc	protein_coding	1.31697	0.000646068
ENSMUSG00000028347,10	Tmeff1	protein_coding	1.31619	0.0298916
ENSMUSG00000058835,10	Abi1	protein_coding	1.31619	0.0365003
ENSMUSG00000084890,1	A830036E02Rik	antisense	1.31617	0.0141078
ENSMUSG00000034544,13	Rsrc1	protein_coding	1.31592	0.0106908
ENSMUSG00000033792,8	Atp7a	protein_coding	1.3129	0.0319825
ENSMUSG00000045036,10	Tmem232	protein_coding	1.31286	0.0125434
ENSMUSG00000053626,4	Tll1	protein_coding	1.3123	0.00315734
[truncated: 626 more rows]
