# Supplementary material for: Ral GTPases promote breast cancer metastasis by controlling biogenesis and organ targeting of exosomes
Source: eLife. 2021 Jan 6;10:e61539. doi: 10.7554/eLife.61539 (PMC7822591; doi:10.7554/eLife.61539)
Supplement: Supplementary file 2. — Sheet a: Proteins identified in EVs from 4T1 shCtl cells Sheet b: Proteins overexpressed in EVs from 4T1 shCtl cells Vs EVs from shRalA cells Sheet c: Proteins overexpressed in EVs from 4T1 shRalA cells Vs EVs from shCtl cells Sheet d: Proteins overexpressed in EVs from 4T1 shCtl cells Vs EVs from shRalB cells Sheet e: Proteins overexpressed in EVs from 4T1 shRalB cells Vs EVs from shCtl cells Sheet f: Proteins overexpressed in EVs from 4T1 shCtl cells Vs EVs from shRalA cells and EVs from shRalB cells [file elife-61539-supp2.xlsx]

## Sheet: Sheet_a
Proteins identified in EVs from4T1 shCtl cells
Majority_protein_IDs	Protein_names	Gene_names	Unique_peptides
A2A5Z6	E3 ubiquitin-protein ligase SMURF2	Smurf2	7
A2A863	Integrin beta-4	Itgb4	45
A2A8L5	Receptor-type tyrosine-protein phosphatase F	Ptprf	4
A2AGA4	Rhomboid-related protein 2;Rhomboid-related protein 2, N-terminal fragment;Rhomboid-related protein 2, C-terminal fragment	Rhbdl2	3
A2AGT5	Cytoskeleton-associated protein 5	Ckap5	2
A2APV2	Formin-like protein 2	Fmnl2	10
B1AVD1		Xpnpep2	3
B2RRE7	OTU domain-containing protein 4	Otud4	6
B2RX12	Canalicular multispecific organic anion transporter 2	Abcc3	1
B2RXS4	Plexin-B2	Plxnb2	59
B2RXV4	Feline leukemia virus subgroup C receptor-related protein 1	Flvcr1	4
E9PVA8		Gcn1l1	4
E9Q5G3	Kinesin-like protein KIF23	Kif23	31
E9Q634	Unconventional myosin-Ie	Myo1e	22
F8VPU2	FERM, RhoGEF and pleckstrin domain-containing protein 1	Farp1	34
F8VQB6	Unconventional myosin-X	Myo10	6
G5E829	Plasma membrane calcium-transporting ATPase 1	Atp2b1	28
O08529	Calpain-2 catalytic subunit	Capn2	13
O08539	Myc box-dependent-interacting protein 1	Bin1	4
O08553	Dihydropyrimidinase-related protein 2	Dpysl2	11
O08581	Potassium channel subfamily K member 1	Kcnk1	4
O08585	Clathrin light chain A	Clta	3
O08688	Calpain-5	Capn5	25
O08709	Peroxiredoxin-6	Prdx6	16
O08792	Transcription factor COE2	Ebf2	1
O08807	Peroxiredoxin-4	Prdx4	1
O08848	60 kDa SS-A/Ro ribonucleoprotein	Trove2	12
O08917	Flotillin-1	Flot1	6
O08969	Pleckstrin homology-like domain family A member 2	Phlda2	3
O08992	Syntenin-1	Sdcbp	16
O08997	Copper transport protein ATOX1	Atox1	1
O09044	Synaptosomal-associated protein 23	Snap23	9
O09061	Proteasome subunit beta type-1	Psmb1	4
O09110	Dual specificity mitogen-activated protein kinase kinase 3	Map2k3	3
O09117	Synaptophysin-like protein 1	Sypl1	3
O09131	Glutathione S-transferase omega-1	Gsto1	9
O09167	60S ribosomal protein L21	Rpl21	3
O35054	Claudin-4	Cldn4	7
O35239	Tyrosine-protein phosphatase non-receptor type 9	Ptpn9	6
O35316	Sodium- and chloride-dependent taurine transporter	Slc6a6	6
O35343	Importin subunit alpha-3	Kpna4	3
O35344	Importin subunit alpha-4	Kpna3	4
O35345	Importin subunit alpha-7	Kpna6	3
O35350	Calpain-1 catalytic subunit	Capn1	8
O35375	Neuropilin-2	Nrp2	17
O35379	Multidrug resistance-associated protein 1	Abcc1	15
O35516	Neurogenic locus notch homolog protein 2;Notch 2 extracellular truncation;Notch 2 intracellular domain	Notch2	3
O35566	CD151 antigen	Cd151	9
O35593	26S proteasome non-ATPase regulatory subunit 14	Psmd14	4
O35598	Disintegrin and metalloproteinase domain-containing protein 10	Adam10	22
O35632	Hyaluronidase-2	Hyal2	6
O35639	Annexin A3	Anxa3	31
O35643	AP-1 complex subunit beta-1	Ap1b1	4
O35658	Complement component 1 Q subcomponent-binding protein, mitochondrial	C1qbp	3
O35682	Myeloid-associated differentiation marker	Myadm	11
O35685	Nuclear migration protein nudC	Nudc	6
O35864	COP9 signalosome complex subunit 5	Cops5	3
O35874	Neutral amino acid transporter A	Slc1a4	13
O54724	Polymerase I and transcript release factor	Ptrf	7
O54734	Dolichyl-diphosphooligosaccharide--protein glycosyltransferase 48 kDa subunit	Ddost	3
O54833	Casein kinase II subunit alpha	Csnk2a2	7
O54890	Integrin beta-3	Itgb3	8
O54940	BCL2/adenovirus E1B 19 kDa protein-interacting protein 2	Bnip2	3
O54950	5-AMP-activated protein kinase subunit gamma-1	Prkag1	4
O54962	Barrier-to-autointegration factor;Barrier-to-autointegration factor, N-terminally processed	Banf1	4
O54984	ATPase Asna1	Asna1	2
O54988	STE20-like serine/threonine-protein kinase	Slk	10
O55023	Inositol monophosphatase 1	Impa1	4
O55098	Serine/threonine-protein kinase 10	Stk10	3
O55111	Desmoglein-2	Dsg2	14
O55131	Septin-7	Sept7	13
O55135	Eukaryotic translation initiation factor 6	Eif6	7
O55142	60S ribosomal protein L35a	Rpl35a	3
O55222	Integrin-linked protein kinase	Ilk	20
O55234	Proteasome subunit beta type-5	Psmb5	4
O70131	Ninjurin-1	Ninj1	1
O70133	ATP-dependent RNA helicase A	Dhx9	5
O70161	Phosphatidylinositol 4-phosphate 5-kinase type-1 gamma	Pip5k1c	6
O70194	Eukaryotic translation initiation factor 3 subunit D	Eif3d	7
O70251	Elongation factor 1-beta	Eef1b	6
O70255	Myelin protein zero-like protein 2	Mpzl2	4
O70274	Protein tyrosine phosphatase type IVA 2	Ptp4a2	5
O70293	G protein-coupled receptor kinase 6	Grk6	4
O70309	Integrin beta-5	Itgb5	23
O70318	Band 4.1-like protein 2	Epb41l2	22
O70325	Phospholipid hydroperoxide glutathione peroxidase, mitochondrial	Gpx4	4
O70433	Four and a half LIM domains protein 2	Fhl2	14
O70435	Proteasome subunit alpha type-3	Psma3	6
O70439	Syntaxin-7	Stx7	3
O70456	14-3-3 protein sigma	Sfn	13
O70475	UDP-glucose 6-dehydrogenase	Ugdh	9
O70492	Sorting nexin-3	Snx3	5
O70503	Very-long-chain 3-oxoacyl-CoA reductase	Hsd17b12	1
O70514	Fibroblast growth factor-binding protein 1	Fgfbp1	3
O70589	Peripheral plasma membrane protein CASK	Cask	17
O70591	Prefoldin subunit 2	Pfdn2	1
O88342	WD repeat-containing protein 1	Wdr1	32
O88447	Kinesin light chain 1	Klc1	3
O88456	Calpain small subunit 1	Capns1	4
O88520	Leucine-rich repeat protein SHOC-2	Shoc2	4
O88543	COP9 signalosome complex subunit 3	Cops3	2
O88544	COP9 signalosome complex subunit 4	Cops4	4
O88569	Heterogeneous nuclear ribonucleoproteins A2/B1	Hnrnpa2b1	3
O88685	26S protease regulatory subunit 6A	Psmc3	5
O88697	Serine/threonine-protein kinase 16	Stk16	3
O88792	Junctional adhesion molecule A	F11r	7
O88844	Isocitrate dehydrogenase [NADP] cytoplasmic	Idh1	3
O88848	ADP-ribosylation factor-like protein 6	Arl6	2
O88947	Coagulation factor X;Factor X light chain;Factor X heavy chain;Activated factor Xa heavy chain	F10	2
O88952	Protein lin-7 homolog C	Lin7c	9
O89086	RNA-binding protein 3	Rbm3	4
P00375	Dihydrofolate reductase	Dhfr	2
P01887	Beta-2-microglobulin	B2m	1
P01897	H-2 class I histocompatibility antigen, L-D alpha chain	H2-L	1
P01900;P01895	H-2 class I histocompatibility antigen, D-D alpha chain;H-2 class I histocompatibility antigen, alpha chain	H2-D1	6
P01902	H-2 class I histocompatibility antigen, K-D alpha chain	H2-K1	8
P03975	IgE-binding protein	Iap	5
P04184	Thymidine kinase, cytosolic	Tk1	4
P05064	Fructose-bisphosphate aldolase A	Aldoa	25
P05201	Aspartate aminotransferase, cytoplasmic	Got1	12
P05202	Aspartate aminotransferase, mitochondrial	Got2	11
P05480	Neuronal proto-oncogene tyrosine-protein kinase Src	Src	19
P05977;P09542	Myosin light chain 1/3, skeletal muscle isoform;Myosin light chain 3	Myl1;Myl3	2
P06151	L-lactate dehydrogenase A chain	Ldha	26
P06745	Glucose-6-phosphate isomerase	Gpi	12
P06795	Multidrug resistance protein 1B	Abcb1b	18
P06797	Cathepsin L1;Cathepsin L1 heavy chain;Cathepsin L1 light chain	Ctsl	3
P06869	Urokinase-type plasminogen activator;Urokinase-type plasminogen activator long chain A;Urokinase-type plasminogen activator short chain A;Urokinase-type plasminogen activator chain B	Plau	22
P07091	Protein S100-A4	S100a4	1
P07356	Annexin A2	Anxa2	35
P07724	Serum albumin	Alb	3
P07901	Heat shock protein HSP 90-alpha	Hsp90aa1	31
P08030	Adenine phosphoribosyltransferase	Aprt	11
P08113	Endoplasmin	Hsp90b1	18
P08207	Protein S100-A10	S100a10	7
P08228	Superoxide dismutase [Cu-Zn]	Sod1	4
P08249	Malate dehydrogenase, mitochondrial	Mdh2	14
P08556	GTPase NRas	Nras	2
P08752	Guanine nucleotide-binding protein G(i) subunit alpha-2	Gnai2	15
P09055	Integrin beta-1	Itgb1	40
P09103	Protein disulfide-isomerase	P4hb	15
P09405	Nucleolin	Ncl	12
P09411	Phosphoglycerate kinase 1	Pgk1	26
P09803	Cadherin-1;E-Cad/CTF1;E-Cad/CTF2;E-Cad/CTF3	Cdh1	28
P0C0A3	Charged multivesicular body protein 6	Chmp6	4
P0DP28;P0DP27;P0DP26			12
P10107	Annexin A1	Anxa1	34
P10126	Elongation factor 1-alpha 1	Eef1a1	18
P10400	Retrovirus-related Pol polyprotein;Reverse transcriptase;Endonuclease	Pol	3
P10404	MLV-related proviral Env polyprotein;Surface protein;Transmembrane protein		4
P10630	Eukaryotic initiation factor 4A-II;Eukaryotic initiation factor 4A-II, N-terminally processed	Eif4a2	3
P10639	Thioredoxin	Txn	8
P10833	Ras-related protein R-Ras	Rras	10
P10852	4F2 cell-surface antigen heavy chain	Slc3a2	28
P11087	Collagen alpha-1(I) chain	Col1a1	3
P11276	Fibronectin;Anastellin	Fn1	42
P11370	Retrovirus-related Env polyprotein from Fv-4 locus	Fv4	4
P11438	Lysosome-associated membrane glycoprotein 1	Lamp1	6
P11440	Cyclin-dependent kinase 1	Cdk1	16
P11499	Heat shock protein HSP 90-beta	Hsp90ab1	29
P11688	Integrin alpha-5;Integrin alpha-5 heavy chain;Integrin alpha-5 light chain	Itga5	12
P11983	T-complex protein 1 subunit alpha	Tcp1	26
P12382	ATP-dependent 6-phosphofructokinase, liver type	Pfkl	9
P12388	Plasminogen activator inhibitor 2, macrophage	Serpinb2	2
P12815	Programmed cell death protein 6	Pdcd6	12
P12970	60S ribosomal protein L7a	Rpl7a	17
P13020	Gelsolin	Gsn	10
P13439	Uridine 5-monophosphate synthase;Orotate phosphoribosyltransferase;Orotidine 5-phosphate decarboxylase	Umps	11
P14069	Protein S100-A6	S100a6	7
P14094	Sodium/potassium-transporting ATPase subunit beta-1	Atp1b1	7
P14115	60S ribosomal protein L27a	Rpl27a	2
P14131	40S ribosomal protein S16	Rps16	8
P14148	60S ribosomal protein L7	Rpl7	12
P14152	Malate dehydrogenase, cytoplasmic	Mdh1	8
P14206	40S ribosomal protein SA	Rpsa	11
P14211	Calreticulin	Calr	11
P14602	Heat shock protein beta-1	Hspb1	1
P14685	26S proteasome non-ATPase regulatory subunit 3	Psmd3	7
P14824	Annexin A6	Anxa6	41
P14869	60S acidic ribosomal protein P0	Rplp0	7
P15208	Insulin receptor;Insulin receptor subunit alpha;Insulin receptor subunit beta	Insr	11
P15379	CD44 antigen	Cd44	8
P15532	Nucleoside diphosphate kinase A	Nme1	7
P15864	Histone H1.2	Hist1h1c	2
P16045	Galectin-1	Lgals1	11
P16056	Hepatocyte growth factor receptor	Met	12
P16110	Galectin-3	Lgals3	6
P16254	Signal recognition particle 14 kDa protein;Signal recognition particle 14 kDa protein, N-terminally processed	Srp14	8
P16330	2,3-cyclic-nucleotide 3-phosphodiesterase	Cnp	13
P16460	Argininosuccinate synthase	Ass1	5
P16546	Spectrin alpha chain, non-erythrocytic 1	Sptan1	27
P16858	Glyceraldehyde-3-phosphate dehydrogenase	Gapdh	21
P17047	Lysosome-associated membrane glycoprotein 2	Lamp2	5
P17156	Heat shock-related 70 kDa protein 2	Hspa2	1
P17182	Alpha-enolase	Eno1	26
P17225	Polypyrimidine tract-binding protein 1	Ptbp1	8
P17426	AP-2 complex subunit alpha-1	Ap2a1	21
P17427	AP-2 complex subunit alpha-2	Ap2a2	19
P17742	Peptidyl-prolyl cis-trans isomerase A;Peptidyl-prolyl cis-trans isomerase A, N-terminally processed	Ppia	12
P17751	Triosephosphate isomerase	Tpi1	16
P17809	Solute carrier family 2, facilitated glucose transporter member 1	Slc2a1	8
P17879;Q61696	Heat shock 70 kDa protein 1B;Heat shock 70 kDa protein 1A	Hspa1b;Hspa1a	14
P17918	Proliferating cell nuclear antigen	Pcna	11
P18052	Receptor-type tyrosine-protein phosphatase alpha	Ptpra	12
P18406	Protein CYR61	Cyr61	10
P18572	Basigin	Bsg	11
P18760	Cofilin-1	Cfl1	18
P18828	Syndecan-1	Sdc1	1
P19096	Fatty acid synthase;[Acyl-carrier-protein] S-acetyltransferase;[Acyl-carrier-protein] S-malonyltransferase;3-oxoacyl-[acyl-carrier-protein] synthase;3-oxoacyl-[acyl-carrier-protein] reductase;3-hydroxyacyl-[acyl-carrier-protein] dehydratase;Enoyl-[acyl-carrier-protein] reductase;Oleoyl-[acyl-carrier-protein] hydrolase	Fasn	9
P19157;P46425	Glutathione S-transferase P 1;Glutathione S-transferase P 2	Gstp1;Gstp2	7
P19253	60S ribosomal protein L13a	Rpl13a	6
P19324	Serpin H1	Serpinh1	4
P20029	78 kDa glucose-regulated protein	Hspa5	26
P20152	Vimentin	Vim	16
P20352	Tissue factor	F3	7
P20444;P68404	Protein kinase C alpha type;Protein kinase C beta type	Prkca;Prkcb	2
P21107	Tropomyosin alpha-3 chain	Tpm3	5
P21278	Guanine nucleotide-binding protein subunit alpha-11	Gna11	9
P21279	Guanine nucleotide-binding protein G(q) subunit alpha	Gnaq	9
P21550	Beta-enolase	Eno3	7
P21956	Lactadherin	Mfge8	25
P21981	Protein-glutamine gamma-glutamyltransferase 2	Tgm2	5
P22892	AP-1 complex subunit gamma-1	Ap1g1	7
P23116	Eukaryotic translation initiation factor 3 subunit A	Eif3a	11
P23242	Gap junction alpha-1 protein	Gja1	30
P23249	Putative helicase MOV-10	Mov10	42
P23506	Protein-L-isoaspartate(D-aspartate) O-methyltransferase	Pcmt1	2
P24369	Peptidyl-prolyl cis-trans isomerase B	Ppib	8
P24452	Macrophage-capping protein	Capg	9
P24527	Leukotriene A-4 hydrolase	Lta4h	7
P24547	Inosine-5-monophosphate dehydrogenase 2	Impdh2	16
P24668	Cation-dependent mannose-6-phosphate receptor	M6pr	2
P24860	G2/mitotic-specific cyclin-B1	Ccnb1	3
P25444	40S ribosomal protein S2	Rps2	15
P25911	Tyrosine-protein kinase Lyn	Lyn	21
P26039	Talin-1	Tln1	43
P26040	Ezrin	Ezr	30
P26041	Moesin	Msn	38
P26043	Radixin	Rdx	19
P26231	Catenin alpha-1	Ctnna1	49
P26443	Glutamate dehydrogenase 1, mitochondrial	Glud1	4
P26516	26S proteasome non-ATPase regulatory subunit 7	Psmd7	4
P26638	Serine--tRNA ligase, cytoplasmic	Sars	12
P26645	Myristoylated alanine-rich C-kinase substrate	Marcks	3
P26883	Peptidyl-prolyl cis-trans isomerase FKBP1A	Fkbp1a	5
P27048;P63163	Small nuclear ribonucleoprotein-associated protein B;Small nuclear ribonucleoprotein-associated protein N	Snrpb;Snrpn	3
P27601	Guanine nucleotide-binding protein subunit alpha-13	Gna13	16
P27659	60S ribosomal protein L3	Rpl3	18
P27773	Protein disulfide-isomerase A3	Pdia3	15
P28229	Gap junction gamma-1 protein	Gjc1	2
P28231	Gap junction beta-3 protein	Gjb3	9
P28474	Alcohol dehydrogenase class-3	Adh5	7
P28571	Sodium- and chloride-dependent glycine transporter 1	Slc6a9	2
P28656	Nucleosome assembly protein 1-like 1	Nap1l1	8
P28659	CUGBP Elav-like family member 1	Celf1	5
P28660	Nck-associated protein 1	Nckap1	48
P28667	MARCKS-related protein	Marcksl1	4
P28867	Protein kinase C delta type;Protein kinase C delta type regulatory subunit;Protein kinase C delta type catalytic subunit	Prkcd	4
P29268	Connective tissue growth factor	Ctgf	11
P29341	Polyadenylate-binding protein 1	Pabpc1	38
P29533	Vascular cell adhesion protein 1	Vcam1	5
P30416	Peptidyl-prolyl cis-trans isomerase FKBP4;Peptidyl-prolyl cis-trans isomerase FKBP4, N-terminally processed	Fkbp4	14
P30999	Catenin delta-1	Ctnnd1	49
P31650	Sodium- and chloride-dependent GABA transporter 3	Slc6a11	1
P31786	Acyl-CoA-binding protein	Dbi	2
P31938	Dual specificity mitogen-activated protein kinase kinase 1	Map2k1	7
P32233	Developmentally-regulated GTP-binding protein 1	Drg1	5
P32261	Antithrombin-III	Serpinc1	3
P32299	B2 bradykinin receptor	Bdkrb2	3
P32507	Nectin-2	Pvrl2	6
P32921	Tryptophan--tRNA ligase, cytoplasmic;T1-TrpRS;T2-TrpRS	Wars	4
P34022	Ran-specific GTPase-activating protein	Ranbp1	7
P34884	Macrophage migration inhibitory factor	Mif	5
P35235	Tyrosine-protein phosphatase non-receptor type 11	Ptpn11	8
P35278	Ras-related protein Rab-5C	Rab5c	8
P35279;P61294	Ras-related protein Rab-6A;Ras-related protein Rab-6B	Rab6a;Rab6b	12
P35282	Ras-related protein Rab-21	Rab21	9
P35283	Ras-related protein Rab-12	Rab12	8
P35285	Ras-related protein Rab-22A	Rab22a	3
P35288	Ras-related protein Rab-23	Rab23	8
P35293	Ras-related protein Rab-18	Rab18	6
P35441	Thrombospondin-1	Thbs1	7
P35456	Urokinase plasminogen activator surface receptor	Plaur	4
P35564	Calnexin	Canx	6
P35700	Peroxiredoxin-1	Prdx1	18
P35762	CD81 antigen	Cd81	4
P35822	Receptor-type tyrosine-protein phosphatase kappa	Ptprk	23
P35922	Fragile X mental retardation protein 1 homolog	Fmr1	2
P35979	60S ribosomal protein L12	Rpl12	5
P35980	60S ribosomal protein L18	Rpl18	6
P36895;P36898	Bone morphogenetic protein receptor type-1A;Bone morphogenetic protein receptor type-1B	Bmpr1a;Bmpr1b	4
P37172	Activin receptor type-1	Acvr1	7
P37889	Fibulin-2	Fbln2	16
P38647	Stress-70 protein, mitochondrial	Hspa9	11
P39054	Dynamin-2	Dnm2	10
P39447	Tight junction protein ZO-1	Tjp1	16
P39688	Tyrosine-protein kinase Fyn	Fyn	5
P40124	Adenylyl cyclase-associated protein 1	Cap1	25
P40142	Transketolase	Tkt	26
P40237	CD82 antigen	Cd82	4
P40240	CD9 antigen	Cd9	12
P40336	Vacuolar protein sorting-associated protein 26A	Vps26a	6
P41105	60S ribosomal protein L28	Rpl28	5
P41245	Matrix metalloproteinase-9	Mmp9	12
P41731	CD63 antigen	Cd63	7
P42208	Septin-2	Sept2	10
P42932	T-complex protein 1 subunit theta	Cct8	26
P43274	Histone H1.4	Hist1h1e	2
P43276	Histone H1.5	Hist1h1b	5
P43277	Histone H1.3	Hist1h1d	1
P43406	Integrin alpha-V;Integrin alpha-V heavy chain;Integrin alpha-V light chain	Itgav	45
P45376	Aldose reductase	Akr1b1	13
P45377	Aldose reductase-related protein 2	Akr1b8	3
P45591	Cofilin-2	Cfl2	10
P46061	Ran GTPase-activating protein 1	Rangap1	10
P46467	Vacuolar protein sorting-associated protein 4B	Vps4b	11
P46471	26S protease regulatory subunit 7	Psmc2	2
P46638	Ras-related protein Rab-11B	Rab11b	1
P46664	Adenylosuccinate synthetase isozyme 2	Adss	11
P46735	Unconventional myosin-Ib	Myo1b	28
P46935	E3 ubiquitin-protein ligase NEDD4	Nedd4	8
P47226	Testin	Tes	9
P47713	Cytosolic phospholipase A2;Phospholipase A2;Lysophospholipase	Pla2g4a	5
P47738	Aldehyde dehydrogenase, mitochondrial	Aldh2	5
P47753	F-actin-capping protein subunit alpha-1	Capza1	6
P47754	F-actin-capping protein subunit alpha-2	Capza2	10
P47757	F-actin-capping protein subunit beta	Capzb	14
P47791	Glutathione reductase, mitochondrial	Gsr	10
P47801	Epithelial membrane protein 1	Emp1	3
P47911	60S ribosomal protein L6	Rpl6	13
P47915	60S ribosomal protein L29	Rpl29	1
P47941	Crk-like protein	Crkl	3
P47955	60S acidic ribosomal protein P1	Rplp1	2
P47962	60S ribosomal protein L5	Rpl5	11
P47963	60S ribosomal protein L13	Rpl13	6
P47968	Ribose-5-phosphate isomerase	Rpia	3
P48024;Q9CXU9	Eukaryotic translation initiation factor 1;Eukaryotic translation initiation factor 1b	Eif1;Eif1b	6
P48036	Annexin A5	Anxa5	28
P48453;P63328	Serine/threonine-protein phosphatase 2B catalytic subunit beta isoform;Serine/threonine-protein phosphatase 2B catalytic subunit alpha isoform	Ppp3cb;Ppp3ca	3
P48678	Prelamin-A/C;Lamin-A/C	Lmna	16
P48962	ADP/ATP translocase 1	Slc25a4	7
P49282	Natural resistance-associated macrophage protein 2	Slc11a2	1
P49722	Proteasome subunit alpha type-2	Psma2	2
P49769	Presenilin-1;Presenilin-1 NTF subunit;Presenilin-1 CTF subunit;Presenilin-1 CTF12	Psen1	5
P49817	Caveolin-1	Cav1	6
P49962	Signal recognition particle 9 kDa protein	Srp9	5
P50247	Adenosylhomocysteinase	Ahcy	19
P50396	Rab GDP dissociation inhibitor alpha	Gdi1	3
P50516	V-type proton ATPase catalytic subunit A	Atp6v1a	13
P50518	V-type proton ATPase subunit E 1	Atp6v1e1	2
P50543	Protein S100-A11	S100a11	6
P50580	Proliferation-associated protein 2G4	Pa2g4	15
P51150	Ras-related protein Rab-7a	Rab7a	17
P51410	60S ribosomal protein L9	Rpl9	9
P51432	1-phosphatidylinositol 4,5-bisphosphate phosphodiesterase beta-3	Plcb3	9
P51655	Glypican-4;Secreted glypican-4	Gpc4	16
P51829	Adenylate cyclase type 7	Adcy7	3
P51863	V-type proton ATPase subunit d 1	Atp6v0d1	3
P51881	ADP/ATP translocase 2;ADP/ATP translocase 2, N-terminally processed	Slc25a5	3
P51912	Neutral amino acid transporter B(0)	Slc1a5	17
P52196	Thiosulfate sulfurtransferase	Tst	1
P52293	Importin subunit alpha-1	Kpna2	20
P52332	Tyrosine-protein kinase JAK1	Jak1	6
P52480	Pyruvate kinase PKM	Pkm	37
P52795	Ephrin-B1	Efnb1	6
P52800	Ephrin-B2	Efnb2	11
P53026	60S ribosomal protein L10a	Rpl10a	6
P53690	Matrix metalloproteinase-14	Mmp14	9
P53810	Phosphatidylinositol transfer protein alpha isoform	Pitpna	4
P53811	Phosphatidylinositol transfer protein beta isoform	Pitpnb	13
P53986	Monocarboxylate transporter 1	Slc16a1	13
P53994;P59279	Ras-related protein Rab-2A;Ras-related protein Rab-2B	Rab2a;Rab2b	12
P54071	Isocitrate dehydrogenase [NADP], mitochondrial	Idh2	5
P54116	Erythrocyte band 7 integral membrane protein	Stom	13
P54728;P54726	UV excision repair protein RAD23 homolog B;UV excision repair protein RAD23 homolog A	Rad23b;Rad23a	2
P54761	Ephrin type-B receptor 4	Ephb4	10
P54763	Ephrin type-B receptor 2	Ephb2	11
P54822	Adenylosuccinate lyase	Adsl	8
P54823	Probable ATP-dependent RNA helicase DDX6	Ddx6	5
P55012	Solute carrier family 12 member 2	Slc12a2	18
P55258	Ras-related protein Rab-8A	Rab8a	7
P55292	Desmocollin-2	Dsc2	3
P56480	ATP synthase subunit beta, mitochondrial	Atp5b	16
P56677	Suppressor of tumorigenicity 14 protein homolog	St14	24
P57716	Nicastrin	Ncstn	12
P57776	Elongation factor 1-delta	Eef1d	8
P57780	Alpha-actinin-4	Actn4	38
P58044	Isopentenyl-diphosphate Delta-isomerase 1	Idi1	6
P58069	Ras GTPase-activating protein 2	Rasa2	6
P58242	Acid sphingomyelinase-like phosphodiesterase 3b	Smpdl3b	15
P58252	Elongation factor 2	Eef2	55
P58389	Serine/threonine-protein phosphatase 2A activator	Ppp2r4	4
P59108	Copine-2	Cpne2	4
P59113	Fermitin family homolog 1	Fermt1	31
P59325	Eukaryotic translation initiation factor 5	Eif5	5
P59999	Actin-related protein 2/3 complex subunit 4	Arpc4	9
P60122	RuvB-like 1	Ruvbl1	9
P60229	Eukaryotic translation initiation factor 3 subunit E	Eif3e	12
P60335	Poly(rC)-binding protein 1	Pcbp1	11
P60521	Gamma-aminobutyric acid receptor-associated protein-like 2	Gabarapl2	7
P60710	Actin, cytoplasmic 1;Actin, cytoplasmic 1, N-terminally processed	Actb	2
P60766	Cell division control protein 42 homolog	Cdc42	11
P60843	Eukaryotic initiation factor 4A-I	Eif4a1	14
P60867	40S ribosomal protein S20	Rps20	3
P60904	DnaJ homolog subfamily C member 5	Dnajc5	4
P61021	Ras-related protein Rab-5B	Rab5b	4
P61027	Ras-related protein Rab-10	Rab10	14
P61028	Ras-related protein Rab-8B	Rab8b	3
P61079;P62838	Ubiquitin-conjugating enzyme E2 D3;Ubiquitin-conjugating enzyme E2 D2	Ube2d3;Ube2d2	3
P61082	NEDD8-conjugating enzyme Ubc12	Ube2m	3
P61087	Ubiquitin-conjugating enzyme E2 K	Ube2k	6
P61089	Ubiquitin-conjugating enzyme E2 N	Ube2n	7
P61161	Actin-related protein 2	Actr2	18
P61208	ADP-ribosylation factor-like protein 4C	Arl4c	7
P61211	ADP-ribosylation factor-like protein 1	Arl1	3
P61222	ATP-binding cassette sub-family E member 1	Abce1	16
P61226	Ras-related protein Rap-2b	Rap2b	5
P61358	60S ribosomal protein L27	Rpl27	6
P61588	Rho-related GTP-binding protein RhoE	Rnd3	4
P61750	ADP-ribosylation factor 4	Arf4	4
P61953	Guanine nucleotide-binding protein G(I)/G(S)/G(O) subunit gamma-11	Gng11	1
P61957;Q9Z172	Small ubiquitin-related modifier 2;Small ubiquitin-related modifier 3	Sumo2;Sumo3	1
P61979	Heterogeneous nuclear ribonucleoprotein K	Hnrnpk	9
P61982	14-3-3 protein gamma;14-3-3 protein gamma, N-terminally processed	Ywhag	10
P62071	Ras-related protein R-Ras2	Rras2	12
P62082	40S ribosomal protein S7	Rps7	8
P62137	Serine/threonine-protein phosphatase PP1-alpha catalytic subunit	Ppp1ca	8
P62141	Serine/threonine-protein phosphatase PP1-beta catalytic subunit	Ppp1cb	2
P62192	26S protease regulatory subunit 4	Psmc1	8
P62196	26S protease regulatory subunit 8	Psmc5	5
P62242	40S ribosomal protein S8	Rps8	10
P62245	40S ribosomal protein S15a	Rps15a	7
P62259	14-3-3 protein epsilon	Ywhae	24
P62264	40S ribosomal protein S14	Rps14	7
P62267	40S ribosomal protein S23	Rps23	6
P62270	40S ribosomal protein S18	Rps18	11
P62274	40S ribosomal protein S29	Rps29	1
P62281	40S ribosomal protein S11	Rps11	12
P62301	40S ribosomal protein S13	Rps13	7
P62315	Small nuclear ribonucleoprotein Sm D1	Snrpd1	2
P62331	ADP-ribosylation factor 6	Arf6	8
P62334	26S protease regulatory subunit 10B	Psmc6	3
P62702	40S ribosomal protein S4, X isoform	Rps4x	16
P62715;P63330	Serine/threonine-protein phosphatase 2A catalytic subunit beta isoform;Serine/threonine-protein phosphatase 2A catalytic subunit alpha isoform	Ppp2cb;Ppp2ca	9
P62717	60S ribosomal protein L18a	Rpl18a	10
P62751	60S ribosomal protein L23a	Rpl23a	8
P62754	40S ribosomal protein S6	Rps6	4
P62774	Myotrophin	Mtpn	5
P62806	Histone H4	Hist1h4a	8
P62814	V-type proton ATPase subunit B, brain isoform	Atp6v1b2	7
P62821	Ras-related protein Rab-1A	Rab1A	8
P62827	GTP-binding nuclear protein Ran	Ran	9
P62830	60S ribosomal protein L23	Rpl23	4
P62835	Ras-related protein Rap-1A	Rap1a	6
P62843	40S ribosomal protein S15	Rps15	5
P62852	40S ribosomal protein S25	Rps25	5
P62855	40S ribosomal protein S26	Rps26	3
P62869	Transcription elongation factor B polypeptide 2	Tceb2	5
P62874	Guanine nucleotide-binding protein G(I)/G(S)/G(T) subunit beta-1	Gnb1	10
P62880	Guanine nucleotide-binding protein G(I)/G(S)/G(T) subunit beta-2	Gnb2	8
P62889	60S ribosomal protein L30	Rpl30	4
P62897	Cytochrome c, somatic	Cycs	4
P62908	40S ribosomal protein S3	Rps3	18
P62911	60S ribosomal protein L32	Rpl32	6
P62918	60S ribosomal protein L8	Rpl8	11
P62960	Nuclease-sensitive element-binding protein 1	Ybx1	4
P62962	Profilin-1	Pfn1	7
P62983;P62984;P0CG49;P0CG50	Ubiquitin-40S ribosomal protein S27a;Ubiquitin;40S ribosomal protein S27a;Ubiquitin-60S ribosomal protein L40;Ubiquitin;60S ribosomal protein L40;Polyubiquitin-B;Ubiquitin;Polyubiquitin-C;Ubiquitin;Ubiquitin-related 1;Ubiquitin-related 2	Rps27a;Uba52;Ubb;Ubc	11
P63001;P60764	Ras-related C3 botulinum toxin substrate 1;Ras-related C3 botulinum toxin substrate 3	Rac1;Rac3	11
P63005	Platelet-activating factor acetylhydrolase IB subunit alpha	Pafah1b1	8
P63017	Heat shock cognate 71 kDa protein	Hspa8	34
P63024;P63044	Vesicle-associated membrane protein 3;Vesicle-associated membrane protein 2	Vamp3;Vamp2	4
P63028	Translationally-controlled tumor protein	Tpt1	7
P63037	DnaJ homolog subfamily A member 1	Dnaja1	16
P63038	60 kDa heat shock protein, mitochondrial	Hspd1	27
P63073	Eukaryotic translation initiation factor 4E	Eif4e	4
P63085	Mitogen-activated protein kinase 1	Mapk1	12
P63087	Serine/threonine-protein phosphatase PP1-gamma catalytic subunit	Ppp1cc	1
P63101	14-3-3 protein zeta/delta	Ywhaz	17
P63158	High mobility group protein B1	Hmgb1	2
P63168;Q9D0M5	Dynein light chain 1, cytoplasmic;Dynein light chain 2, cytoplasmic	Dynll1;Dynll2	4
P63242	Eukaryotic translation initiation factor 5A-1	Eif5a	13
P63254	Cysteine-rich protein 1	Crip1	2
P63260	Actin, cytoplasmic 2;Actin, cytoplasmic 2, N-terminally processed	Actg1	2
P63276	40S ribosomal protein S17	Rps17	4
P63280	SUMO-conjugating enzyme UBC9	Ube2i	2
P63321	Ras-related protein Ral-A	Rala	6
P63323	40S ribosomal protein S12	Rps12	5
P63325	40S ribosomal protein S10	Rps10	5
P67984	60S ribosomal protein L22	Rpl22	3
P68033;P63268;P62737;P68134	Actin, alpha cardiac muscle 1;Actin, gamma-enteric smooth muscle;Actin, aortic smooth muscle;Actin, alpha skeletal muscle	Actc1;Actg2;Acta2;Acta1	2
P68037	Ubiquitin-conjugating enzyme E2 L3	Ube2l3	7
P68040	Guanine nucleotide-binding protein subunit beta-2-like 1;Guanine nucleotide-binding protein subunit beta-2-like 1, N-terminally processed	Gnb2l1	14
P68254	14-3-3 protein theta	Ywhaq	15
P68368	Tubulin alpha-4A chain	Tuba4a	3
P68369;P05214	Tubulin alpha-1A chain;Tubulin alpha-3 chain	Tuba1a;Tuba3a	1
P68372;Q9D6F9	Tubulin beta-4B chain;Tubulin beta-4A chain	Tubb4b;Tubb4a	5
P68373;Q9JJZ2	Tubulin alpha-1C chain;Tubulin alpha-8 chain	Tuba1c;Tuba8	1
P68433	Histone H3.1	Hist1h3a	1
P68510	14-3-3 protein eta	Ywhah	14
P70122	Ribosome maturation protein SBDS	Sbds	3
P70124	Serpin B5	Serpinb5	3
P70168	Importin subunit beta-1	Kpnb1	33
P70206	Plexin-A1	Plxna1	3
P70290	55 kDa erythrocyte membrane protein	Mpp1	6
P70296	Phosphatidylethanolamine-binding protein 1;Hippocampal cholinergic neurostimulating peptide	Pebp1	11
P70297	Signal transducing adapter molecule 1	Stam	5
P70312	Hyaluronan synthase 2	Has2	10
P70349	Histidine triad nucleotide-binding protein 1	Hint1	8
P70352	Ecto-ADP-ribosyltransferase 5	Art5	1
P70441	Na(+)/H(+) exchange regulatory cofactor NHE-RF1	Slc9a3r1	14
P70452	Syntaxin-4	Stx4	8
P70460	Vasodilator-stimulated phosphoprotein	Vasp	9
P70677	Caspase-3;Caspase-3 subunit p17;Caspase-3 subunit p12	Casp3	6
P70698	CTP synthase 1	Ctps1	14
P80313	T-complex protein 1 subunit eta	Cct7	23
P80314	T-complex protein 1 subunit beta	Cct2	33
P80315	T-complex protein 1 subunit delta	Cct4	23
P80316	T-complex protein 1 subunit epsilon	Cct5	22
P80317	T-complex protein 1 subunit zeta	Cct6a	24
P80318	T-complex protein 1 subunit gamma	Cct3	27
P83882	60S ribosomal protein L36a	Rpl36a	2
P84078	ADP-ribosylation factor 1	Arf1	1
P84084	ADP-ribosylation factor 5	Arf5	3
P84089	Enhancer of rudimentary homolog	Erh	1
P84091	AP-2 complex subunit mu	Ap2m1	15
P84096	Rho-related GTP-binding protein RhoG	Rhog	11
P84099	60S ribosomal protein L19	Rpl19	5
P84104	Serine/arginine-rich splicing factor 3	Srsf3	2
P84228	Histone H3.2	Hist1h3b	1
P84244;P02301	Histone H3.3;Histone H3.3C	H3f3a;H3f3c	1
P97298	Pigment epithelium-derived factor	Serpinf1	1
P97300	Neuroplastin	Nptn	6
P97315	Cysteine and glycine-rich protein 1	Csrp1	6
P97351	40S ribosomal protein S3a	Rps3a	14
P97370	Sodium/potassium-transporting ATPase subunit beta-3	Atp1b3	14
P97371	Proteasome activator complex subunit 1	Psme1	3
P97384	Annexin A11	Anxa11	17
P97429	Annexin A4	Anxa4	21
P97454	Mothers against decapentaplegic homolog 5	Smad5	3
P97461	40S ribosomal protein S5;40S ribosomal protein S5, N-terminally processed	Rps5	7
P97792	Coxsackievirus and adenovirus receptor homolog	Cxadr	18
P97807	Fumarate hydratase, mitochondrial	Fh	4
P97820	Mitogen-activated protein kinase kinase kinase kinase 4	Map4k4	5
P97823	Acyl-protein thioesterase 1	Lypla1	2
P97857	A disintegrin and metalloproteinase with thrombospondin motifs 1	Adamts1	8
P98063	Bone morphogenetic protein 1	Bmp1	7
P98197	Probable phospholipid-transporting ATPase IH	Atp11a	6
P99024	Tubulin beta-5 chain	Tubb5	5
P99027	60S acidic ribosomal protein P2	Rplp2	5
P99029	Peroxiredoxin-5, mitochondrial	Prdx5	9
Q00612	Glucose-6-phosphate 1-dehydrogenase X	G6pdx	7
Q00993	Tyrosine-protein kinase receptor UFO	Axl	20
Q01730	Ras suppressor protein 1	Rsu1	12
Q01768	Nucleoside diphosphate kinase B	Nme2	7
Q01853	Transitional endoplasmic reticulum ATPase	Vcp	41
Q02053	Ubiquitin-like modifier-activating enzyme 1	Uba1	28
Q02248	Catenin beta-1	Ctnnb1	34
Q02257	Junction plakoglobin	Jup	32
Q02738	Gap junction beta-4 protein	Gjb4	9
Q03137	Ephrin type-A receptor 4	Epha4	7
Q03145	Ephrin type-A receptor 2	Epha2	44
Q03265	ATP synthase subunit alpha, mitochondrial	Atp5a1	10
Q04736	Tyrosine-protein kinase Yes	Yes1	14
Q05512	Serine/threonine-protein kinase MARK2	Mark2	9
Q05769	Prostaglandin G/H synthase 2	Ptgs2	7
Q05816	Fatty acid-binding protein, epidermal	Fabp5	9
Q05D44	Eukaryotic translation initiation factor 5B	Eif5b	9
Q06138	Calcium-binding protein 39	Cab39	9
Q06890	Clusterin;Clusterin beta chain;Clusterin alpha chain	Clu	11
Q07076	Annexin A7	Anxa7	11
Q07832	Serine/threonine-protein kinase PLK1	Plk1	6
Q08093	Calponin-2	Cnn2	8
Q08509	Epidermal growth factor receptor kinase substrate 8	Eps8	9
Q09143	High affinity cationic amino acid transporter 1	Slc7a1	11
Q11011	Puromycin-sensitive aminopeptidase	Npepps	7
Q2NL51	Glycogen synthase kinase-3 alpha	Gsk3a	2
Q32NY4	Metal transporter CNNM3	Cnnm3	2
Q3TEW6	Myelin protein zero-like protein 1	Mpzl1	6
Q3THS6	S-adenosylmethionine synthase isoform type-2	Mat2a	3
Q3THW5;P0C0S6	Histone H2A.V;Histone H2A.Z	H2afv;H2afz	2
Q3TJ91	Lethal(2) giant larvae protein homolog 2	Llgl2	18
Q3TXS7	26S proteasome non-ATPase regulatory subunit 1	Psmd1	7
Q3TZZ7	Extended synaptotagmin-2	Esyt2	5
Q3U1J4	DNA damage-binding protein 1	Ddb1	14
Q3U1V6	Ubiquitin-conjugating enzyme E2 variant 3	Uevld	9
Q3U7R1	Extended synaptotagmin-1	Esyt1	5
Q3UDE2	Tubulin--tyrosine ligase-like protein 12	Ttll12	2
Q3UFK8	FERM domain-containing protein 8	Frmd8	4
Q3UGC7;Q66JS6	Eukaryotic translation initiation factor 3 subunit J-A;Eukaryotic translation initiation factor 3 subunit J-B	Eif3j1;Eif3j2	2
Q3UHD6	Sorting nexin-27	Snx27	4
Q3UHH2	Solute carrier family 22 member 23	Slc22a23	4
Q3UPF5	Zinc finger CCCH-type antiviral protein 1	Zc3hav1	18
Q3UTJ2	Sorbin and SH3 domain-containing protein 2	Sorbs2	4
Q3UUY6	Prominin-2	Prom2	17
Q3UV17	Keratin, type II cytoskeletal 2 oral	Krt76	2
Q3V1L4	Cytosolic purine 5-nucleotidase	Nt5c2	14
Q3V3F6	Myelin protein zero-like protein 3	Mpzl3	4
Q4KML4	Costars family protein ABRACL	Abracl	3
Q4PZA2	Endothelin-converting enzyme 1	Ece1	12
Q501J7	Phosphatase and actin regulator 4	Phactr4	10
Q5EG47	5-AMP-activated protein kinase catalytic subunit alpha-1	Prkaa1	4
Q5F2E8	Serine/threonine-protein kinase TAO1	Taok1	12
Q5FWK3	Rho GTPase-activating protein 1	Arhgap1	8
Q5S248	Transmembrane protease serine 11E;Transmembrane protease serine 11E non-catalytic chain;Transmembrane protease serine 11E catalytic chain	Tmprss11e	20
Q5SQX6	Cytoplasmic FMR1-interacting protein 2	Cyfip2	3
Q5SSL4	Active breakpoint cluster region-related protein	Abr	2
Q5SSZ5	Tensin-3	Tns3	7
Q5SYD0	Unconventional myosin-Id	Myo1d	38
Q5U462	CUB domain-containing protein 1	Cdcp1	29
Q5U4C1	G-protein coupled receptor-associated sorting protein 1	Gprasp1	3
Q5Y5T1	Probable palmitoyltransferase ZDHHC20	Zdhhc20	3
Q60598	Src substrate cortactin	Cttn	11
Q60605	Myosin light polypeptide 6	Myl6	8
Q60631	Growth factor receptor-bound protein 2	Grb2	11
Q60634	Flotillin-2	Flot2	15
Q60668	Heterogeneous nuclear ribonucleoprotein D0	Hnrnpd	3
Q60692	Proteasome subunit beta type-6	Psmb6	6
Q60737	Casein kinase II subunit alpha	Csnk2a1	8
Q60738	Zinc transporter 1	Slc30a1	3
Q60750	Ephrin type-A receptor 1	Epha1	9
Q60751	Insulin-like growth factor 1 receptor;Insulin-like growth factor 1 receptor alpha chain;Insulin-like growth factor 1 receptor beta chain	Igf1r	13
Q60767	Lymphocyte antigen 75	Ly75	7
Q60770	Syntaxin-binding protein 3	Stxbp3	22
Q60790	Ras GTPase-activating protein 3	Rasa3	32
Q60817;P70670	Nascent polypeptide-associated complex subunit alpha;Nascent polypeptide-associated complex subunit alpha, muscle-specific form	Naca	3
Q60854	Serpin B6	Serpinb6	20
Q60864	Stress-induced-phosphoprotein 1	Stip1	30
Q60930	Voltage-dependent anion-selective channel protein 2	Vdac2	6
Q60931	Voltage-dependent anion-selective channel protein 3	Vdac3	2
Q60932	Voltage-dependent anion-selective channel protein 1	Vdac1	9
Q60996	Serine/threonine-protein phosphatase 2A 56 kDa regulatory subunit gamma isoform	Ppp2r5c	2
Q61009	Scavenger receptor class B member 1	Scarb1	11
Q61024	Asparagine synthetase [glutamine-hydrolyzing]	Asns	9
Q61072	Disintegrin and metalloproteinase domain-containing protein 9	Adam9	13
Q61081	Hsp90 co-chaperone Cdc37;Hsp90 co-chaperone Cdc37, N-terminally processed	Cdc37	6
Q61087	Laminin subunit beta-3	Lamb3	23
Q61092	Laminin subunit gamma-2	Lamc2	19
Q61140	Breast cancer anti-estrogen resistance protein 1	Bcar1	5
Q61146	Occludin	Ocln	3
Q61147	Ceruloplasmin	Cp	10
Q61151	Serine/threonine-protein phosphatase 2A 56 kDa regulatory subunit epsilon isoform	Ppp2r5e	4
Q61166	Microtubule-associated protein RP/EB family member 1	Mapre1	7
Q61171	Peroxiredoxin-2	Prdx2	13
Q61187	Tumor susceptibility gene 101 protein	Tsg101	23
Q61205	Platelet-activating factor acetylhydrolase IB subunit gamma	Pafah1b3	3
Q61206	Platelet-activating factor acetylhydrolase IB subunit beta	Pafah1b2	5
Q61210	Rho guanine nucleotide exchange factor 1	Arhgef1	7
Q61233	Plastin-2	Lcp1	16
Q61235	Beta-2-syntrophin	Sntb2	10
Q61316	Heat shock 70 kDa protein 4	Hspa4	20
Q61382	TNF receptor-associated factor 4	Traf4	3
Q61411	GTPase HRas;GTPase HRas, N-terminally processed	Hras	2
Q61468	Mesothelin;Megakaryocyte-potentiating factor;Mesothelin, cleaved form	Msln	8
Q61490	CD166 antigen	Alcam	19
Q61503	5-nucleotidase	Nt5e	33
Q61553	Fascin	Fscn1	28
Q61581	Insulin-like growth factor-binding protein 7	Igfbp7	6
Q61584	Fragile X mental retardation syndrome-related protein 1	Fxr1	3
Q61598	Rab GDP dissociation inhibitor beta	Gdi2	33
Q61609	Sodium-dependent phosphate transporter 1	Slc20a1	1
Q61655	ATP-dependent RNA helicase DDX19A	Ddx19a	7
Q61656;Q501J6	Probable ATP-dependent RNA helicase DDX5;Probable ATP-dependent RNA helicase DDX17	Ddx5;Ddx17	3
Q61672	Equilibrative nucleoside transporter 2	Slc29a2	4
Q61699	Heat shock protein 105 kDa	Hsph1	11
Q61730	Interleukin-1 receptor accessory protein	Il1rap	3
Q61735	Leukocyte surface antigen CD47	Cd47	5
Q61738	Integrin alpha-7;Integrin alpha-7 heavy chain;Integrin alpha-7 light chain	Itga7	12
Q61739	Integrin alpha-6;Integrin alpha-6 heavy chain;Integrin alpha-6 light chain	Itga6	52
Q61753	D-3-phosphoglycerate dehydrogenase	Phgdh	16
Q61768	Kinesin-1 heavy chain	Kif5b	26
Q61792	LIM and SH3 domain protein 1	Lasp1	7
Q61879	Myosin-10	Myh10	32
Q61937	Nucleophosmin	Npm1	9
Q61990	Poly(rC)-binding protein 2	Pcbp2	14
Q62095	ATP-dependent RNA helicase DDX3Y	Ddx3y	1
Q62159	Rho-related GTP-binding protein RhoC	Rhoc	2
Q62165	Dystroglycan;Alpha-dystroglycan;Beta-dystroglycan	Dag1	8
Q62167;P16381	ATP-dependent RNA helicase DDX3X;Putative ATP-dependent RNA helicase Pl10	Ddx3x;D1Pas1	6
Q62261	Spectrin beta chain, non-erythrocytic 1	Sptbn1	14
Q62312	TGF-beta receptor type-2	Tgfbr2	17
Q62348	Translin	Tsn	6
Q62351	Transferrin receptor protein 1	Tfrc	35
Q62419	Endophilin-A2	Sh3gl1	19
Q62422	Osteoclast-stimulating factor 1	Ostf1	2
Q62426	Cystatin-B	Cstb	4
Q62433	Protein NDRG1	Ndrg1	11
Q62465	Synaptic vesicle membrane protein VAT-1 homolog	Vat1	17
Q62469	Integrin alpha-2	Itga2	40
Q62470	Integrin alpha-3;Integrin alpha-3 heavy chain;Integrin alpha-3 light chain	Itga3	42
Q62523	Zyxin	Zyx	16
Q63739	Protein tyrosine phosphatase type IVA 1	Ptp4a1	5
Q63961	Endoglin	Eng	8
Q64008	Ras-related protein Rab-34	Rab34	14
Q64010	Adapter molecule crk	Crk	5
Q64302	Transmembrane 4 L6 family member 1	Tm4sf1	3
Q64324	Syntaxin-binding protein 2	Stxbp2	16
Q64337	Sequestosome-1	Sqstm1	9
Q64433	10 kDa heat shock protein, mitochondrial	Hspe1	7
Q64514	Tripeptidyl-peptidase 2	Tpp2	15
Q64674	Spermidine synthase	Srm	8
Q64695	Endothelial protein C receptor	Procr	2
Q64704	Syntaxin-3	Stx3	3
Q64727	Vinculin	Vcl	53
Q64729	TGF-beta receptor type-1	Tgfbr1	5
Q64735	Complement component receptor 1-like protein	Cr1l	5
Q64737	Trifunctional purine biosynthetic protein adenosine-3;Phosphoribosylamine--glycine ligase;Phosphoribosylformylglycinamidine cyclo-ligase;Phosphoribosylglycinamide formyltransferase	Gart	22
Q66JY6	Rho guanine nucleotide exchange factor 39	Arhgef39	6
Q68FD5	Clathrin heavy chain 1	Cltc	63
Q68FF6	ARF GTPase-activating protein GIT1	Git1	14
Q68FH0	Plakophilin-4	Pkp4	5
Q68FL6	Methionine--tRNA ligase, cytoplasmic	Mars	4
Q69ZF7	Metal transporter CNNM4	Cnnm4	10
Q69ZN7	Myoferlin	Myof	72
Q6DFX2	Anthrax toxin receptor 2	Antxr2	8
Q6EDY6	Leucine-rich repeat-containing protein 16A	Lrrc16a	12
Q6F3F9	G-protein coupled receptor 126	Gpr126	5
Q6IRU2	Tropomyosin alpha-4 chain	Tpm4	14
Q6IRU5	Clathrin light chain B	Cltb	2
Q6KAU4	Multivesicular body subunit 12B	Mvb12b	8
Q6NVF9	Cleavage and polyadenylation specificity factor subunit 6	Cpsf6	2
Q6NZJ6	Eukaryotic translation initiation factor 4 gamma 1	Eif4g1	10
Q6P069	Sorcin	Sri	5
Q6P1B1	Xaa-Pro aminopeptidase 1	Xpnpep1	8
Q6P1F6	Serine/threonine-protein phosphatase 2A 55 kDa regulatory subunit B alpha isoform	Ppp2r2a	3
Q6P2B1	Transportin-3	Tnpo3	8
Q6P5F6	Zinc transporter ZIP10	Slc39a10	11
Q6P5F7	Protein tweety homolog 3	Ttyh3	7
Q6P5F9	Exportin-1	Xpo1	16
Q6P8X1	Sorting nexin-6;Sorting nexin-6, N-terminally processed	Snx6	6
Q6P9J9	Anoctamin-6	Ano6	27
Q6P9R2	Serine/threonine-protein kinase OSR1	Oxsr1	5
Q6PB44	Tyrosine-protein phosphatase non-receptor type 23	Ptpn23	7
Q6PDN3	Myosin light chain kinase, smooth muscle;Myosin light chain kinase, smooth muscle, deglutamylated form	Mylk	1
Q6PFQ7	Ras GTPase-activating protein 4	Rasa4	2
Q6PHN9	Ras-related protein Rab-35	Rab35	10
Q6PIX5	Inactive rhomboid protein 1	Rhbdf1	4
Q6R0H7;P63094	Guanine nucleotide-binding protein G(s) subunit alpha isoforms XLas;Guanine nucleotide-binding protein G(s) subunit alpha isoforms short	Gnas	19
Q6X893	Choline transporter-like protein 1	Slc44a1	18
Q6ZPF4	Formin-like protein 3	Fmnl3	7
Q6ZQ38	Cullin-associated NEDD8-dissociated protein 1	Cand1	21
Q6ZWN5	40S ribosomal protein S9	Rps9	11
Q6ZWV3;P86048	60S ribosomal protein L10;60S ribosomal protein L10-like	Rpl10;Rpl10l	10
Q6ZWV7	60S ribosomal protein L35	Rpl35	3
Q6ZWX6	Eukaryotic translation initiation factor 2 subunit 1	Eif2s1	11
Q6ZWY3	40S ribosomal protein S27-like	Rps27l	1
Q71FD7	Filamin-binding LIM protein 1	Fblim1	6
Q76MZ3	Serine/threonine-protein phosphatase 2A 65 kDa regulatory subunit A alpha isoform	Ppp2r1a	21
Q78HU3	Multivesicular body subunit 12A	Mvb12a	12
Q78ZA7	Nucleosome assembly protein 1-like 4	Nap1l4	3
Q7M6Y3	Phosphatidylinositol-binding clathrin assembly protein	Picalm	11
Q7M759	Alpha/beta hydrolase domain-containing protein 17B	Abhd17b	6
Q7TMB8	Cytoplasmic FMR1-interacting protein 1	Cyfip1	33
Q7TMK9	Heterogeneous nuclear ribonucleoprotein Q	Syncrip	13
Q7TMS5	ATP-binding cassette sub-family G member 2	Abcg2	11
Q7TPR4	Alpha-actinin-1	Actn1	39
Q7TQI3	Ubiquitin thioesterase OTUB1	Otub1	12
Q7TT50	Serine/threonine-protein kinase MRCK beta	Cdc42bpb	4
Q80SW1	Putative adenosylhomocysteinase 2	Ahcyl1	9
Q80SZ7	Guanine nucleotide-binding protein G(I)/G(S)/G(O) subunit gamma-5	Gng5	3
Q80TH2	Protein LAP2	Erbb2ip	12
Q80U72	Protein scribble homolog	Scrib	5
Q80UG5	Septin-9	Sept9	4
Q80UP8	Sodium-dependent phosphate transporter 2	Slc20a2	5
Q80UY1	UPF0586 protein C9orf41 homolog		2
Q80VQ1	Leucine-rich repeat-containing protein 1	Lrrc1	8
Q80W68	Kin of IRRE-like protein 1	Kirrel	13
Q80W93	Hydrocephalus-inducing protein	Hydin	3
Q80X90	Filamin-B	Flnb	28
Q80X95;Q6NTA4	Ras-related GTP-binding protein A;Ras-related GTP-binding protein B	Rraga;Rragb	6
Q80XC3	USP6 N-terminal-like protein	Usp6nl	10
Q80Y17	Lethal(2) giant larvae protein homolog 1	Llgl1	14
Q80YS6	Actin filament-associated protein 1	Afap1	3
Q80Z96	Vang-like protein 1	Vangl1	6
Q80ZJ1	Ras-related protein Rap-2a	Rap2a	2
Q811D0	Disks large homolog 1	Dlg1	18
Q8BFW7	Lipoma-preferred partner homolog	Lpp	17
Q8BFY6	Peflin	Pef1	3
Q8BFY9	Transportin-1	Tnpo1	10
Q8BFZ3	Beta-actin-like protein 2	Actbl2	2
Q8BG32	26S proteasome non-ATPase regulatory subunit 11	Psmd11	9
Q8BG67	Protein EFR3 homolog A	Efr3a	19
Q8BGB2	Tetratricopeptide repeat protein 7A	Ttc7a	6
Q8BGK6	Y+L amino acid transporter 2	Slc7a6	6
Q8BGQ7	Alanine--tRNA ligase, cytoplasmic	Aars	18
Q8BGS1	Band 4.1-like protein 5	Epb41l5	14
Q8BGU5	Cyclin-Y	Ccny	3
Q8BGV3	Tumor-associated calcium signal transducer 2	Tacstd2	18
Q8BGX0	E3 ubiquitin-protein ligase TRIM23	Trim23	1
Q8BH43	Wiskott-Aldrich syndrome protein family member 2	Wasf2	8
Q8BH57	WD repeat-containing protein 48	Wdr48	7
Q8BH64	EH domain-containing protein 2	Ehd2	35
Q8BHJ6	Serine incorporator 5	Serinc5	1
Q8BHL4	Retinoic acid-induced protein 3	Gprc5a	6
Q8BHN3	Neutral alpha-glucosidase AB	Ganab	11
Q8BI08	Protein MAL2	Mal2	2
Q8BIK4	Dedicator of cytokinesis protein 9	Dock9	18
Q8BJU2	Tetraspanin-9	Tspan9	4
Q8BJY1	26S proteasome non-ATPase regulatory subunit 5	Psmd5	4
Q8BJZ3	Protein lifeguard 3	Tmbim1	1
Q8BK63	Casein kinase I isoform alpha	Csnk1a1	7
Q8BK64	Activator of 90 kDa heat shock protein ATPase homolog 1	Ahsa1	3
Q8BKC5	Importin-5	Ipo5	21
Q8BKG3	Inactive tyrosine-protein kinase 7	Ptk7	23
Q8BKX1	Brain-specific angiogenesis inhibitor 1-associated protein 2	Baiap2	27
Q8BM86	Lipoma HMGIC fusion partner	Lhfp	4
Q8BML9		Qars	8
Q8BNY6	Neuronal calcium sensor 1	Ncs1	4
Q8BP47	Asparagine--tRNA ligase, cytoplasmic	Nars	9
Q8BP67	60S ribosomal protein L24	Rpl24	5
Q8BPB0;Q921Y0	MOB kinase activator 1B;MOB kinase activator 1A	Mob1b;Mob1a	7
Q8BPM0	Disheveled-associated activator of morphogenesis 1	Daam1	12
Q8BR63	Protein FAM177A1	Fam177a1	6
Q8BSL7	ADP-ribosylation factor 2	Arf2	1
Q8BT07	Centrosomal protein of 55 kDa	Cep55	27
Q8BT60	Copine-3	Cpne3	14
Q8BTH8	Casein kinase I isoform gamma-1	Csnk1g1	2
Q8BTM8	Filamin-A	Flna	69
Q8BTV2	Cleavage and polyadenylation specificity factor subunit 7	Cpsf7	2
Q8BTY2	Sodium bicarbonate cotransporter 3	Slc4a7	11
Q8BU31	Ras-related protein Rap-2c	Rap2c	7
Q8BVF7	Gamma-secretase subunit APH-1A	Aph1a	2
Q8BWB6	Metalloreductase STEAP2	Steap2	17
Q8BWT5	Disco-interacting protein 2 homolog A	Dip2a	9
Q8BWY3	Eukaryotic peptide chain release factor subunit 1	Etf1	13
Q8BWZ3	N-alpha-acetyltransferase 25, NatB auxiliary subunit	Naa25	4
Q8BY89	Choline transporter-like protein 2	Slc44a2	21
Q8BZ20	Poly [ADP-ribose] polymerase 12	Parp12	11
Q8BZ98	Dynamin-3	Dnm3	1
Q8C0E2	Vacuolar protein sorting-associated protein 26B	Vps26b	3
Q8C0E3	Tripartite motif-containing protein 47	Trim47	8
Q8C0Z1	Protein ITFG3	Itfg3	12
Q8C145	Zinc transporter ZIP6	Slc39a6	7
Q8C166	Copine-1	Cpne1	7
Q8C1B7	Septin-11	Sept11	8
Q8C4Q6	Axin interactor, dorsalization-associated protein	Aida	9
Q8C522	Endonuclease domain-containing 1 protein	Endod1	10
Q8C7R4	Ubiquitin-like modifier-activating enzyme 6	Uba6	7
Q8C863	E3 ubiquitin-protein ligase Itchy	Itch	24
Q8C8U0	Liprin-beta-1	Ppfibp1	5
Q8CAY6	Acetyl-CoA acetyltransferase, cytosolic	Acat2	3
Q8CBW3	Abl interactor 1	Abi1	13
Q8CDN6	Thioredoxin-like protein 1	Txnl1	4
Q8CFE6	Sodium-coupled neutral amino acid transporter 2	Slc38a2	10
Q8CFI0	E3 ubiquitin-protein ligase NEDD4-like	Nedd4l	8
Q8CGC7	Bifunctional glutamate/proline--tRNA ligase;Glutamate--tRNA ligase;Proline--tRNA ligase	Eprs	18
Q8CGP2;Q8CGP1;Q6ZWY9;Q64525;Q64478;Q64475;P10854;P10853;Q9D2U9;Q8CGP0;Q64524;P70696	Histone H2B type 1-P;Histone H2B type 1-K;Histone H2B type 1-C/E/G;Histone H2B type 2-B;Histone H2B type 1-H;Histone H2B type 1-B;Histone H2B type 1-M;Histone H2B type 1-F/J/L;Histone H2B type 3-A;Histone H2B type 3-B;Histone H2B type 2-E;Histone H2B type 1-A	Hist1h2bp;Hist1h2bk;Hist1h2bc;Hist2h2bb;Hist1h2bh;Hist1h2bb;Hist1h2bm;Hist1h2bf;Hist3h2ba;Hist3h2bb;Hist2h2be;Hist1h2ba	6
Q8CHH9	Septin-8	Sept8	2
Q8CI32	BAG family molecular chaperone regulator 5	Bag5	8
Q8CI51	PDZ and LIM domain protein 5	Pdlim5	10
Q8CI85	Carbonic anhydrase 12	Ca12	6
Q8CI94	Glycogen phosphorylase, brain form	Pygb	5
Q8CIB5	Fermitin family homolog 2	Fermt2	20
Q8CIN4	Serine/threonine-protein kinase PAK 2;PAK-2p27;PAK-2p34	Pak2	17
Q8CJ40	Rootletin	Crocc	1
Q8CJ53	Cdc42-interacting protein 4	Trip10	9
Q8CJH3	Plexin-B1	Plxnb1	4
Q8JZQ9	Eukaryotic translation initiation factor 3 subunit B	Eif3b	14
Q8JZZ7	Latrophilin-2	Lphn2	11
Q8K021	Secretory carrier-associated membrane protein 1	Scamp1	3
Q8K0E7	Serine incorporator 2	Serinc2	3
Q8K1M6	Dynamin-1-like protein	Dnm1l	4
Q8K1S3	Netrin receptor UNC5B	Unc5b	8
Q8K211	High affinity copper uptake protein 1	Slc31a1	2
Q8K298	Actin-binding protein anillin	Anln	15
Q8K2J0	1-phosphatidylinositol 4,5-bisphosphate phosphodiesterase delta-3	Plcd3	21
Q8K2J7	RELT-like protein 1	Rell1	9
Q8K2P7	Sodium-coupled neutral amino acid transporter 1	Slc38a1	9
Q8K2Q7	BRO1 domain-containing protein BROX	Brox	13
Q8K353	Cysteine-rich and transmembrane domain-containing protein 1	Cystm1	2
Q8K385	Ferric-chelate reductase 1	FRRS1	3
Q8QZY1	Eukaryotic translation initiation factor 3 subunit L	Eif3l	16
Q8QZY6	Tetraspanin-14	Tspan14	11
Q8R010	Aminoacyl tRNA synthase complex-interacting multifunctional protein 2	Aimp2	4
Q8R050;Q149F3	Eukaryotic peptide chain release factor GTP-binding subunit ERF3A;Eukaryotic peptide chain release factor GTP-binding subunit ERF3B	Gspt1;Gspt2	8
Q8R0J7	Vacuolar protein sorting-associated protein 37B	Vps37b	11
Q8R105	Vacuolar protein sorting-associated protein 37C	Vps37c	9
Q8R143	Pituitary tumor-transforming gene 1 protein-interacting protein	Pttg1ip	4
Q8R146	Acylamino-acid-releasing enzyme	Apeh	3
Q8R1B4	Eukaryotic translation initiation factor 3 subunit C	Eif3c	9
Q8R1F1	Niban-like protein 1	Fam129b	26
Q8R1Q8	Cytoplasmic dynein 1 light intermediate chain 1	Dync1li1	7
Q8R2Q8	Bone marrow stromal antigen 2	Bst2	3
Q8R2Y2	Cell surface glycoprotein MUC18	Mcam	13
Q8R366	Immunoglobulin superfamily member 8	Igsf8	25
Q8R502	Volume-regulated anion channel subunit LRRC8C	Lrrc8c	11
Q8VBW1	Sodium- and chloride-dependent creatine transporter 1	Slc6a8	4
Q8VC88	Grancalcin	Gca	2
Q8VCT3	Aminopeptidase B	Rnpep	9
Q8VD75	Huntingtin-interacting protein 1	Hip1	3
Q8VDD5	Myosin-9	Myh9	69
Q8VDM4	26S proteasome non-ATPase regulatory subunit 2	Psmd2	16
Q8VDN2	Sodium/potassium-transporting ATPase subunit alpha-1	Atp1a1	51
Q8VDV8	MIT domain-containing protein 1	Mitd1	7
Q8VDW0;Q9Z1N5	ATP-dependent RNA helicase DDX39A;Spliceosome RNA helicase Ddx39b	Ddx39a;Ddx39b	5
Q8VDZ4	Palmitoyltransferase ZDHHC5	Zdhhc5	17
Q8VE70	Programmed cell death protein 10	Pdcd10	5
Q8VE98	CD276 antigen	Cd276	4
Q8VEJ9	Vacuolar protein sorting-associated protein 4A	Vps4a	8
Q8VEK3	Heterogeneous nuclear ribonucleoprotein U	Hnrnpu	7
Q8VEM8	Phosphate carrier protein, mitochondrial	Slc25a3	8
Q8VEN2	Placenta-expressed transcript 1 protein	Plet1	2
Q8VHB5	Carbonic anhydrase 9	Ca9	6
Q8VI36	Paxillin	Pxn	11
Q91V12	Cytosolic acyl coenzyme A thioester hydrolase	Acot7	5
Q91V41	Ras-related protein Rab-14	Rab14	14
Q91V92	ATP-citrate synthase	Acly	29
Q91VC3	Eukaryotic initiation factor 4A-III;Eukaryotic initiation factor 4A-III, N-terminally processed	Eif4a3	8
Q91VH2	Sorting nexin-9	Snx9	15
Q91VH6	Protein MEMO1	Memo1	5
Q91VI7	Ribonuclease inhibitor	Rnh1	12
Q91VJ4	Serine/threonine-protein kinase 38	Stk38	4
Q91VR5	ATP-dependent RNA helicase DDX1	Ddx1	4
Q91VU0	Protein FAM3C	Fam3c	1
Q91W53	Golgin subfamily A member 7	Golga7	6
Q91W69	Epsin-3	Epn3	1
Q91WK2	Eukaryotic translation initiation factor 3 subunit H	Eif3h	6
Q91WS7	DEP domain-containing protein 7	Depdc7	12
Q91XD6	Vacuolar protein-sorting-associated protein 36	Vps36	8
Q91XV3	Brain acid soluble protein 1	Basp1	15
Q91YH5	Atlastin-3	Atl3	7
Q91YR1	Twinfilin-1	Twf1	7
Q91Z67	SLIT-ROBO Rho GTPase-activating protein 2	Srgap2	17
Q91ZR2	Sorting nexin-18	Snx18	7
Q920E5	Farnesyl pyrophosphate synthase	Fdps	7
Q921E2	Ras-related protein Rab-31	Rab31	9
Q921I6	SH3 domain-binding protein 4	Sh3bp4	8
Q921J2	GTP-binding protein Rheb	Rheb	7
Q921M7	Protein FAM49B	Fam49b	15
Q921W0	Charged multivesicular body protein 1a	Chmp1a	5
Q922B2	Aspartate--tRNA ligase, cytoplasmic	Dars	12
Q922D8	C-1-tetrahydrofolate synthase, cytoplasmic;Methylenetetrahydrofolate dehydrogenase;Methenyltetrahydrofolate cyclohydrolase;Formyltetrahydrofolate synthetase;C-1-tetrahydrofolate synthase, cytoplasmic, N-terminally processed	Mthfd1	11
Q922F4	Tubulin beta-6 chain	Tubb6	5
Q922K9	Tyrosine-protein kinase FRK	Frk	6
Q922Q8	Leucine-rich repeat-containing protein 59	Lrrc59	2
Q922R8	Protein disulfide-isomerase A6	Pdia6	4
Q923U0	TOM1-like protein 1	Tom1l1	7
Q924C6	Lysyl oxidase homolog 4	Loxl4	29
Q93092	Transaldolase	Taldo1	5
Q99020	Heterogeneous nuclear ribonucleoprotein A/B	Hnrnpab	3
Q99104	Unconventional myosin-Va	Myo5a	20
Q99J93	Interferon-induced transmembrane protein 2	Ifitm2	5
Q99JB8	Protein kinase C and casein kinase II substrate protein 3	Pacsin3	12
Q99JI4	26S proteasome non-ATPase regulatory subunit 6	Psmd6	4
Q99JI6	Ras-related protein Rap-1b	Rap1b	6
Q99JR5	Tubulointerstitial nephritis antigen-like	Tinagl1	22
Q99JW4	LIM and senescent cell antigen-like-containing domain protein 1	Lims1	13
Q99JW5	Epithelial cell adhesion molecule	Epcam	19
Q99JX4	Eukaryotic translation initiation factor 3 subunit M	Eif3m	5
Q99JY9	Actin-related protein 3	Actr3	22
Q99JZ0	Syntenin-2	Sdcbp2	13
Q99K30	Epidermal growth factor receptor kinase substrate 8-like protein 2	Eps8l2	12
Q99K48	Non-POU domain-containing octamer-binding protein	Nono	1
Q99K51	Plastin-3	Pls3	28
Q99K70;Q7TT45	Ras-related GTP-binding protein C;Ras-related GTP-binding protein D	Rragc;Rragd	6
Q99K85	Phosphoserine aminotransferase	Psat1	14
Q99KG5	Lipolysis-stimulated lipoprotein receptor	Lsr	21
Q99KH8;Q99JT2	Serine/threonine-protein kinase 24;Serine/threonine-protein kinase 24 35 kDa subunit;Serine/threonine-protein kinase 24 12 kDa subunit;Serine/threonine-protein kinase 26	Stk24;Stk26	1
Q99KK7	Dipeptidyl peptidase 3	Dpp3	8
Q99KN1	Arrestin domain-containing protein 1	Arrdc1	18
Q99KN9	Clathrin interactor 1	Clint1	3
Q99KP6	Pre-mRNA-processing factor 19	Prpf19	4
Q99KW3	TRIO and F-actin-binding protein	Triobp	5
Q99L45	Eukaryotic translation initiation factor 2 subunit 2	Eif2s2	5
Q99L47	Hsc70-interacting protein	St13	8
Q99LD4	COP9 signalosome complex subunit 1	Gps1	2
Q99LE6	ATP-binding cassette sub-family F member 2	Abcf2	7
Q99LF4	tRNA-splicing ligase RtcB homolog	Rtcb	7
Q99LI8	Hepatocyte growth factor-regulated tyrosine kinase substrate	Hgs	6
Q99LX0	Protein deglycase DJ-1	Park7	7
Q99MN1	Lysine--tRNA ligase	Kars	12
Q99MS7	EH domain-binding protein 1-like protein 1	Ehbp1l1	3
Q99P72	Reticulon-4	Rtn4	8
Q99PT1	Rho GDP-dissociation inhibitor 1	Arhgdia	12
Q9CPR4	60S ribosomal protein L17	Rpl17	8
Q9CPU0	Lactoylglutathione lyase	Glo1	7
Q9CPV4	Glyoxalase domain-containing protein 4	Glod4	4
Q9CPW4	Actin-related protein 2/3 complex subunit 5	Arpc5	4
Q9CPY7	Cytosol aminopeptidase	Lap3	13
Q9CQ10	Charged multivesicular body protein 3	Chmp3	5
Q9CQ60	6-phosphogluconolactonase	Pgls	6
Q9CQ65	S-methyl-5-thioadenosine phosphorylase	Mtap	14
Q9CQ79	Thioredoxin domain-containing protein 9	Txndc9	1
Q9CQ80	Vacuolar protein-sorting-associated protein 25	Vps25	7
Q9CQC6	Basic leucine zipper and W2 domain-containing protein 1	Bzw1	15
Q9CQC9	GTP-binding protein SAR1b	Sar1b	3
Q9CQD1	Ras-related protein Rab-5A	Rab5a	4
Q9CQF3	Cleavage and polyadenylation specificity factor subunit 5	Nudt21	6
Q9CQI6	Coactosin-like protein	Cotl1	5
Q9CQI7;Q62189	U2 small nuclear ribonucleoprotein B;U1 small nuclear ribonucleoprotein A	Snrpb2;Snrpa	2
Q9CQL1;P61327	Protein mago nashi homolog 2;Protein mago nashi homolog	Magohb;Magoh	2
Q9CQM5	Thioredoxin domain-containing protein 17	Txndc17	3
Q9CQM9	Glutaredoxin-3	Glrx3	5
Q9CQR2	40S ribosomal protein S21	Rps21	1
Q9CQV6	Microtubule-associated proteins 1A/1B light chain 3B	Map1lc3b	1
Q9CQV8	14-3-3 protein beta/alpha;14-3-3 protein beta/alpha, N-terminally processed	Ywhab	9
Q9CQW1	Synaptobrevin homolog YKT6	Ykt6	10
Q9CQW2	ADP-ribosylation factor-like protein 8B	Arl8b	2
Q9CQW9	Interferon-induced transmembrane protein 3	Ifitm3	3
Q9CQX5	Claudin domain-containing protein 1	Cldnd1	4
Q9CR09	Ubiquitin-fold modifier-conjugating enzyme 1	Ufc1	1
Q9CR16	Peptidyl-prolyl cis-trans isomerase D	Ppid	11
Q9CR26	Vacuolar protein sorting-associated protein VTA1 homolog	Vta1	6
Q9CR57	60S ribosomal protein L14	Rpl14	4
Q9CR86	Calcium-regulated heat stable protein 1	Carhsp1	3
Q9CRA5	Golgi phosphoprotein 3	Golph3	2
Q9CVB6	Actin-related protein 2/3 complex subunit 2	Arpc2	19
Q9CWJ9	Bifunctional purine biosynthesis protein PURH;Phosphoribosylaminoimidazolecarboxamide formyltransferase;IMP cyclohydrolase	Atic	28
Q9CWK8	Sorting nexin-2	Snx2	4
Q9CWR7	Metalloreductase STEAP1	Steap1	5
Q9CWS0	N(G),N(G)-dimethylarginine dimethylaminohydrolase 1	Ddah1	8
Q9CX00	IST1 homolog	Ist1	15
Q9CX34	Suppressor of G2 allele of SKP1 homolog	Sugt1	1
Q9CXI3	DBH-like monooxygenase protein 1	Moxd1	18
Q9CXW3	Calcyclin-binding protein	Cacybp	8
Q9CXW4	60S ribosomal protein L11	Rpl11	7
Q9CXY6	Interleukin enhancer-binding factor 2	Ilf2	10
Q9CYL5	Golgi-associated plant pathogenesis-related protein 1	Glipr2	3
Q9CZ28	Vacuolar-sorting protein SNF8	Snf8	3
Q9CZ30	Obg-like ATPase 1	Ola1	13
Q9CZ44	NSFL1 cofactor p47	Nsfl1c	3
Q9CZD3	Glycine--tRNA ligase	Gars	12
Q9CZE3	Ras-related protein Rab-32	Rab32	4
Q9CZM2	60S ribosomal protein L15	Rpl15	8
Q9CZN7	Serine hydroxymethyltransferase	Shmt2	8
Q9CZU6	Citrate synthase, mitochondrial	Cs	6
Q9CZX7	Type 2 phosphatidylinositol 4,5-bisphosphate 4-phosphatase	Tmem55a	4
Q9CZX8	40S ribosomal protein S19	Rps19	6
Q9D074	E3 ubiquitin-protein ligase MGRN1	Mgrn1	6
Q9D0F9	Phosphoglucomutase-1	Pgm1	6
Q9D0I9	Arginine--tRNA ligase, cytoplasmic	Rars	20
Q9D0R2	Threonine--tRNA ligase, cytoplasmic	Tars	18
Q9D1C8	Vacuolar protein sorting-associated protein 28 homolog	Vps28	16
Q9D1D4	Transmembrane emp24 domain-containing protein 10	Tmed10	4
Q9D1G1	Ras-related protein Rab-1B	Rab1b	5
Q9D1G5	Leucine-rich repeat-containing protein 57	Lrrc57	4
Q9D1R9	60S ribosomal protein L34	Rpl34	3
Q9D4B1	Phosphatidylcholine:ceramide cholinephosphotransferase 2	Sgms2	2
Q9D5R2	WD repeat-containing protein 20	Wdr20	4
Q9D662	Protein transport protein Sec23B	Sec23b	7
Q9D709	Transmembrane protein 79	Tmem79	14
Q9D7F7	Charged multivesicular body protein 4c	Chmp4c	3
Q9D7S9	Charged multivesicular body protein 5	Chmp5	4
Q9D819	Inorganic pyrophosphatase	Ppa1	12
Q9D892	Inosine triphosphate pyrophosphatase	Itpa	4
Q9D898	Actin-related protein 2/3 complex subunit 5-like protein	Arpc5l	4
Q9D8B3	Charged multivesicular body protein 4b	Chmp4b	7
Q9D8E6	60S ribosomal protein L4	Rpl4	16
Q9D8F3	Solute carrier family 52, riboflavin transporter, member 2	Slc52a2	1
Q9D8N0	Elongation factor 1-gamma	Eef1g	24
Q9D8U8	Sorting nexin-5	Snx5	6
Q9D8W5	26S proteasome non-ATPase regulatory subunit 12	Psmd12	7
Q9D8Y0;Q9D4J1	EF-hand domain-containing protein D2;EF-hand domain-containing protein D1	Efhd2;Efhd1	2
Q9DAS9	Guanine nucleotide-binding protein G(I)/G(S)/G(O) subunit gamma-12	Gng12	5
Q9DAX2	Lipid phosphate phosphohydrolase 2	Ppap2c	3
Q9DB05	Alpha-soluble NSF attachment protein	Napa	11
Q9DB34	Charged multivesicular body protein 2a	Chmp2a	8
Q9DBC7	cAMP-dependent protein kinase type I-alpha regulatory subunit;cAMP-dependent protein kinase type I-alpha regulatory subunit, N-terminally processed	Prkar1a	4
Q9DBG3	AP-2 complex subunit beta	Ap2b1	23
Q9DBG7	Signal recognition particle receptor subunit alpha	Srpr	3
Q9DBG9	Tax1-binding protein 3	Tax1bp3	3
Q9DBH0	NEDD4-like E3 ubiquitin-protein ligase WWP2	Wwp2	24
Q9DBJ1	Phosphoglycerate mutase 1	Pgam1	16
Q9DBZ5	Eukaryotic translation initiation factor 3 subunit K	Eif3k	5
Q9DC28;Q9JMK2	Casein kinase I isoform delta;Casein kinase I isoform epsilon	Csnk1d;Csnk1e	4
Q9DC51	Guanine nucleotide-binding protein G(k) subunit alpha	Gnai3	12
Q9DC53	Copine-8	Cpne8	32
Q9DCD0	6-phosphogluconate dehydrogenase, decarboxylating	Pgd	14
Q9DCH4	Eukaryotic translation initiation factor 3 subunit F	Eif3f	5
Q9DCK3	Tetraspanin-4	Tspan4	6
Q9DCL9	Multifunctional protein ADE2;Phosphoribosylaminoimidazole-succinocarboxamide synthase;Phosphoribosylaminoimidazole carboxylase	Paics	12
Q9DCN2	NADH-cytochrome b5 reductase 3;NADH-cytochrome b5 reductase 3 membrane-bound form;NADH-cytochrome b5 reductase 3 soluble form	Cyb5r3	4
Q9DD03	Ras-related protein Rab-13	Rab13	1
Q9EPC1	Alpha-parvin	Parva	9
Q9EPK2	Protein XRP2	Rp2	9
Q9EPK8	Transient receptor potential cation channel subfamily V member 4	Trpv4	20
Q9EPL8	Importin-7	Ipo7	17
Q9EPR4	Solute carrier family 23 member 2	Slc23a2	4
Q9EPT5	Solute carrier organic anion transporter family member 2A1	Slco2a1	8
Q9EPU0	Regulator of nonsense transcripts 1	Upf1	16
Q9EQH3	Vacuolar protein sorting-associated protein 35	Vps35	21
Q9EQK5	Major vault protein	Mvp	22
Q9EQN9		Slc19a2	1
Q9EQP2	EH domain-containing protein 4	Ehd4	30
Q9EQU5	Protein SET	Set	4
Q9ER63	Tumor necrosis factor receptor superfamily member 23	Tnfrsf23	4
Q9ER72	Cysteine--tRNA ligase, cytoplasmic	Cars	7
Q9ERB0	Synaptosomal-associated protein 29	Snap29	1
Q9ERG0	LIM domain and actin-binding protein 1	Lima1	1
Q9ERK4	Exportin-2	Cse1l	18
Q9ES28	Rho guanine nucleotide exchange factor 7	Arhgef7	20
Q9ES46	Beta-parvin	Parvb	5
Q9ES74	Serine/threonine-protein kinase Nek7	Nek7	3
Q9ES97	Reticulon-3	Rtn3	1
Q9ESD6	CKLF-like MARVEL transmembrane domain-containing protein 7	Cmtm7	2
Q9ET43	Claudin-12	Cldn12	2
Q9ET54	Palladin	Palld	6
Q9JHJ0	Tropomodulin-3	Tmod3	4
Q9JHR7	Insulin-degrading enzyme	Ide	10
Q9JHU4	Cytoplasmic dynein 1 heavy chain 1	Dync1h1	8
Q9JHU9	Inositol-3-phosphate synthase 1	Isyna1	13
Q9JHZ2	Progressive ankylosis protein	Ankh	9
Q9JIF0	Protein arginine N-methyltransferase 1	Prmt1	9
Q9JIF7	Coatomer subunit beta	Copb1	4
Q9JII6	Alcohol dehydrogenase [NADP(+)]	Akr1a1	4
Q9JIM1	Equilibrative nucleoside transporter 1	Slc29a1	8
Q9JIS8;Q924N4	Solute carrier family 12 member 4;Solute carrier family 12 member 6	Slc12a4;Slc12a6	7
Q9JIW9	Ras-related protein Ral-B	Ralb	6
Q9JIZ9	Phospholipid scramblase 3	Plscr3	9
Q9JJ00	Phospholipid scramblase 1	Plscr1	8
Q9JJF9	Signal peptide peptidase-like 2A	Sppl2a	2
Q9JJI8	60S ribosomal protein L38	Rpl38	2
Q9JK83	Partitioning defective 6 homolog beta	Pard6b	3
Q9JKA5	Cell surface A33 antigen	Gpa33	7
Q9JKB3	Y-box-binding protein 3	Ybx3	2
Q9JKF1	Ras GTPase-activating-like protein IQGAP1	Iqgap1	73
Q9JKZ2	Sodium/myo-inositol cotransporter	Slc5a3	12
Q9JLB0	MAGUK p55 subfamily member 6	Mpp6	16
Q9JLJ0	Lipopolysaccharide-induced tumor necrosis factor-alpha factor homolog	Litaf	2
Q9JLJ2	4-trimethylaminobutyraldehyde dehydrogenase	Aldh9a1	5
Q9JLQ0	CD2-associated protein	Cd2ap	13
Q9JLQ2	ARF GTPase-activating protein GIT2	Git2	7
Q9JLY7	Dual specificity protein phosphatase 14	Dusp14	1
Q9JLZ6	Hypermethylated in cancer 2 protein	Hic2	1
Q9JM14	5(3)-deoxyribonucleotidase, cytosolic type	Nt5c	4
Q9JM76	Actin-related protein 2/3 complex subunit 3	Arpc3	7
Q9JMH6	Thioredoxin reductase 1, cytoplasmic	Txnrd1	10
Q9QUI0	Transforming protein RhoA	Rhoa	4
Q9QUJ7	Long-chain-fatty-acid--CoA ligase 4	Acsl4	34
Q9QUM0	Integrin alpha-IIb;Integrin alpha-IIb heavy chain;Integrin alpha-IIb light chain	Itga2b	3
Q9QUM9	Proteasome subunit alpha type-6	Psma6	7
Q9QUR6	Prolyl endopeptidase	Prep	18
Q9QUR7	Peptidyl-prolyl cis-trans isomerase NIMA-interacting 1	Pin1	3
Q9QWH1	Polyhomeotic-like protein 2	Phc2	1
Q9QXS1	Plectin	Plec	50
Q9QXS6	Drebrin	Dbn1	3
Q9QY23	Plakophilin-3	Pkp3	34
Q9QYB1	Chloride intracellular channel protein 4	Clic4	18
Q9QYI3	DnaJ homolog subfamily C member 7	Dnajc7	7
Q9QYJ0	DnaJ homolog subfamily A member 2	Dnaja2	17
Q9QZ06	Toll-interacting protein	Tollip	5
Q9QZ88	Vacuolar protein sorting-associated protein 29	Vps29	6
Q9QZC7	Pleckstrin homology domain-containing family B member 2	Plekhb2	6
Q9QZD9	Eukaryotic translation initiation factor 3 subunit I	Eif3i	5
Q9QZF2	Glypican-1;Secreted glypican-1	Gpc1	15
Q9QZI8	Serine incorporator 1	Serinc1	2
Q9QZM4	Tumor necrosis factor receptor superfamily member 10B	Tnfrsf10b	3
Q9QZQ1	Afadin	Mllt4	16
Q9QZQ8;Q8CCK0	Core histone macro-H2A.1;Core histone macro-H2A.2	H2afy;H2afy2	2
Q9R059	Four and a half LIM domains protein 3	Fhl3	4
Q9R0M4	Podocalyxin	Podxl	1
Q9R0N0	Galactokinase	Galk1	8
Q9R0P3	S-formylglutathione hydrolase	Esd	10
Q9R0P5	Destrin	Dstn	13
Q9R0Q7	Prostaglandin E synthase 3	Ptges3	6
Q9R118	Serine protease HTRA1	Htra1	19
Q9R1P1	Proteasome subunit beta type-3	Psmb3	2
Q9R1P3	Proteasome subunit beta type-2	Psmb2	6
Q9R1P4	Proteasome subunit alpha type-1	Psma1	8
Q9R1Q6	Transmembrane protein 176B	Tmem176b	4
Q9R1Q7	Proteolipid protein 2	Plp2	5
Q9WTI7	Unconventional myosin-Ic	Myo1c	66
Q9WTL2	Ras-related protein Rab-25	Rab25	5
Q9WTM5	RuvB-like 2	Ruvbl2	4
Q9WTP6	Adenylate kinase 2, mitochondrial;Adenylate kinase 2, mitochondrial, N-terminally processed	Ak2	6
Q9WTX5	S-phase kinase-associated protein 1	Skp1	5
Q9WU78	Programmed cell death 6-interacting protein	Pdcd6ip	62
Q9WUA2	Phenylalanine--tRNA ligase beta subunit	Farsb	8
Q9WUK2	Eukaryotic translation initiation factor 4H	Eif4h	4
Q9WUL7	ADP-ribosylation factor-like protein 3	Arl3	5
Q9WUM3	Coronin-1B	Coro1b	9
Q9WUM4	Coronin-1C	Coro1c	11
Q9WV32	Actin-related protein 2/3 complex subunit 1B	Arpc1b	17
Q9WV80	Sorting nexin-1	Snx1	2
Q9WV91	Prostaglandin F2 receptor negative regulator	Ptgfrn	45
Q9WVA4	Transgelin-2	Tagln2	16
Q9WVC3	Caveolin-2	Cav2	2
Q9WVE8	Protein kinase C and casein kinase substrate in neurons protein 2	Pacsin2	18
Q9WVG5	Endothelial lipase	Lipg	6
Q9WVG6	Histone-arginine methyltransferase CARM1	Carm1	8
Q9WVJ2	26S proteasome non-ATPase regulatory subunit 13	Psmd13	5
Q9WVK4	EH domain-containing protein 1	Ehd1	31
Q9WVL3	Solute carrier family 12 member 7	Slc12a7	11
Q9WVM1	Rac GTPase-activating protein 1	Racgap1	25
Q9Z0F8	Disintegrin and metalloproteinase domain-containing protein 17	Adam17	6
Q9Z0G0	PDZ domain-containing protein GIPC1	Gipc1	11
Q9Z0G9	Claudin-3	Cldn3	9
Q9Z0L0	Trophoblast glycoprotein	Tpbg	4
Q9Z0N1;Q9Z0N2	Eukaryotic translation initiation factor 2 subunit 3, X-linked;Eukaryotic translation initiation factor 2 subunit 3, Y-linked	Eif2s3x;Eif2s3y	15
Q9Z0P4	Paralemmin-1	Palm	6
Q9Z0P5	Twinfilin-2	Twf2	3
Q9Z0S1	3(2),5-bisphosphate nucleotidase 1	Bpnt1	4
Q9Z0T9	Integrin beta-6	Itgb6	11
Q9Z0U1	Tight junction protein ZO-2	Tjp2	22
Q9Z127	Large neutral amino acids transporter small subunit 1	Slc7a5	6
Q9Z139	Tyrosine-protein kinase transmembrane receptor ROR1	Ror1	6
Q9Z1D1	Eukaryotic translation initiation factor 3 subunit G	Eif3g	1
Q9Z1Q5	Chloride intracellular channel protein 1	Clic1	19
Q9Z1Q9	Valine--tRNA ligase	Vars	30
Q9Z1W8	Potassium-transporting ATPase alpha chain 2	Atp12a	1
Q9Z1X4	Interleukin enhancer-binding factor 3	Ilf3	13
Q9Z1Y4	Thyroid receptor-interacting protein 6	Trip6	15
Q9Z1Z2	Serine-threonine kinase receptor-associated protein	Strap	7
Q9Z204	Heterogeneous nuclear ribonucleoproteins C1/C2	Hnrnpc	2
Q9Z261	Claudin-7	Cldn7	3
Q9Z2D1	Myotubularin-related protein 2	Mtmr2	4
Q9Z2H5	Band 4.1-like protein 1	Epb41l1	8
Q9Z2H7	PDZ domain-containing protein GIPC2	Gipc2	4
Q9Z2U0;Q9CWH6	Proteasome subunit alpha type-7;Proteasome subunit alpha type-7-like	Psma7;Psma8	5
Q9Z2U1	Proteasome subunit alpha type-5	Psma5	4
Q9Z2W0	Aspartyl aminopeptidase	Dnpep	1.00559

## Sheet: Sheet_b
Proteins overexpressed in EVs from 4T1 shCtl cells Vs EVs from shRalA cells (FDR 1%)
Majority_protein_IDs	Protein_names	Gene_names	Unique_peptides	FC	P_Value
P63321	Ras-related protein Ral-A	Rala	6	59.4801	9.06062e-20
O08581	Potassium channel subfamily K member 1	Kcnk1	4	5.59971	0.00154367
Q8BI08	Protein MAL2	Mal2	2	4.09262	3.17973e-09
Q8BFY9	Transportin-1	Tnpo1	10	4.05133	2.56872e-06
P37889	Fibulin-2	Fbln2	16	3.99164	2.69793e-06
P11276	Fibronectin;Anastellin	Fn1	42	3.98666	9.88305e-11
Q06890	Clusterin;Clusterin beta chain;Clusterin alpha chain	Clu	11	3.38439	2.99405e-06
P35441	Thrombospondin-1	Thbs1	7	3.05265	0.000828192
Q8BT07	Centrosomal protein of 55 kDa	Cep55	27	3.04786	2.58289e-13
Q9CZN7	Serine hydroxymethyltransferase	Shmt2	8	3.00163	0.000263388
P32299	B2 bradykinin receptor	Bdkrb2	3	2.85551	4.46349e-05
P55292	Desmocollin-2	Dsc2	3	2.7279	0.000843767
Q5U462	CUB domain-containing protein 1	Cdcp1	29	2.58498	3.53891e-15
O09167	60S ribosomal protein L21	Rpl21	3	2.57626	0.00108727
P41245	Matrix metalloproteinase-9	Mmp9	12	2.31571	1.92889e-08
Q9R118	Serine protease HTRA1	Htra1	19	2.31291	1.0139e-09
Q71FD7	Filamin-binding LIM protein 1	Fblim1	6	2.26257	0.00103027
O55111	Desmoglein-2	Dsg2	14	2.24793	1.57087e-09
Q9CZE3	Ras-related protein Rab-32	Rab32	4	2.17025	7.58745e-05
Q02738	Gap junction beta-4 protein	Gjb4	9	2.14813	8.58785e-07
Q9CXI3	DBH-like monooxygenase protein 1	Moxd1	18	2.13974	3.28798e-06
P63254	Cysteine-rich protein 1	Crip1	2	2.03934	0.000558487
P60521	Gamma-aminobutyric acid receptor-associated protein-like 2	Gabarapl2	7	1.99576	0.000383843
Q9WTL2	Ras-related protein Rab-25	Rab25	5	1.97499	8.226e-06
P24369	Peptidyl-prolyl cis-trans isomerase B	Ppib	8	1.89514	0.00130128
P52800	Ephrin-B2	Efnb2	11	1.8775	1.95971e-05
Q91WS7	DEP domain-containing protein 7	Depdc7	12	1.87017	4.74167e-05
Q7TMS5	ATP-binding cassette sub-family G member 2	Abcg2	11	1.77391	8.91544e-06
P43276	Histone H1.5	Hist1h1b	5	1.77064	2.41752e-06
P11688	Integrin alpha-5;Integrin alpha-5 heavy chain;Integrin alpha-5 light chain	Itga5	12	1.75394	2.34404e-05
Q8R2Y2	Cell surface glycoprotein MUC18	Mcam	13	1.75248	0.000922537
Q9JLQ0	CD2-associated protein	Cd2ap	13	1.68454	2.33262e-05
Q07832	Serine/threonine-protein kinase PLK1	Plk1	6	1.67382	0.00118648
Q99JR5	Tubulointerstitial nephritis antigen-like	Tinagl1	22	1.63952	1.42873e-09
Q6P5F7	Protein tweety homolog 3	Ttyh3	7	1.63446	0.000292816
Q9JKB3	Y-box-binding protein 3	Ybx3	2	1.62874	0.00040037
Q9EQK5	Major vault protein	Mvp	22	1.61695	0.00158913
Q78ZA7	Nucleosome assembly protein 1-like 4	Nap1l4	3	1.61541	0.000810064
P51655	Glypican-4;Secreted glypican-4	Gpc4	16	1.6107	5.68629e-07
B1AVD1		Xpnpep2	3	1.60448	0.001804
Q08093	Calponin-2	Cnn2	8	1.60315	0.0011986
Q62470	Integrin alpha-3;Integrin alpha-3 heavy chain;Integrin alpha-3 light chain	Itga3	42	1.59509	1.48515e-09
P18828	Syndecan-1	Sdc1	1	1.57124	5.93219e-07
Q9WUM4	Coronin-1C	Coro1c	11	1.56204	0.000990511
Q02257	Junction plakoglobin	Jup	32	1.55412	7.43539e-08
Q3V3F6	Myelin protein zero-like protein 3	Mpzl3	4	1.55133	4.65239e-08
P62852	40S ribosomal protein S25	Rps25	5	1.5256	0.0010433
Q9WUM3	Coronin-1B	Coro1b	9	1.52321	0.000788701
Q9CQR2	40S ribosomal protein S21	Rps21	1	1.51523	0.00138415
O08688	Calpain-5	Capn5	25	1.51267	2.13565e-07
Q8C863	E3 ubiquitin-protein ligase Itchy	Itch	24	1.50688	1.17614e-05
Q9CPW4	Actin-related protein 2/3 complex subunit 5	Arpc5	4	1.49391	1.0206e-05
Q60996	Serine/threonine-protein phosphatase 2A 56 kDa regulatory subunit gamma isoform	Ppp2r5c	2	1.48648	0.000129627
Q9JHJ0	Tropomodulin-3	Tmod3	4	1.47775	0.00080511
Q99JB8	Protein kinase C and casein kinase II substrate protein 3	Pacsin3	12	1.47747	0.000811306
P09055	Integrin beta-1	Itgb1	40	1.46333	1.37573e-09
Q9Z0T9	Integrin beta-6	Itgb6	11	1.43878	6.50378e-09
Q6ZWV7	60S ribosomal protein L35	Rpl35	3	1.43839	1.91791e-05
E9Q5G3	Kinesin-like protein KIF23	Kif23	31	1.43709	1.39358e-06
P17427	AP-2 complex subunit alpha-2	Ap2a2	19	1.4333	0.00130514
P68033	Actin, alpha cardiac muscle 1;Actin, gamma-enteric smooth muscle;Actin, aortic smooth muscle;Actin, alpha skeletal muscle	Actc1;Actg2;Acta2;Acta1	2	1.43077	1.53133e-08
Q61468	Mesothelin;Megakaryocyte-potentiating factor;Mesothelin, cleaved form	Msln	8	1.41039	0.0002827
Q9D898	Actin-related protein 2/3 complex subunit 5-like protein	Arpc5l	4	1.4048	0.000928747
P28231	Gap junction beta-3 protein	Gjb3	9	1.39579	0.00169672
P35279	Ras-related protein Rab-6A;Ras-related protein Rab-6B	Rab6a;Rab6b	12	1.35626	1.68555e-06
Q91V41	Ras-related protein Rab-14	Rab14	14	1.3513	3.64188e-07
Q9WV32	Actin-related protein 2/3 complex subunit 1B	Arpc1b	17	1.34586	2.56211e-06
P14602	Heat shock protein beta-1	Hspb1	1	1.34359	0.000421682
Q99KN1	Arrestin domain-containing protein 1	Arrdc1	18	1.33841	5.65961e-06
Q9DBG3	AP-2 complex subunit beta	Ap2b1	23	1.33593	0.000543186
O35598	Disintegrin and metalloproteinase domain-containing protein 10	Adam10	22	1.33119	1.92098e-06
Q7TPR4	Alpha-actinin-1	Actn1	39	1.33048	1.1121e-06
Q9QXS1	Plectin	Plec	50	1.31396	8.59744e-05
Q61739	Integrin alpha-6;Integrin alpha-6 heavy chain;Integrin alpha-6 light chain	Itga6	52	1.3069	8.48874e-06
Q9WVM1	Rac GTPase-activating protein 1	Racgap1	25	1.29475	4.7441e-05
Q9Z261	Claudin-7	Cldn7	3	1.29301	1.08658e-05
P60710	Actin, cytoplasmic 1;Actin, cytoplasmic 1, N-terminally processed	Actb	2	1.28906	9.13432e-06
P57780	Alpha-actinin-4	Actn4	38	1.28218	3.91721e-06
O08992	Syntenin-1	Sdcbp	16	1.28094	0.000919747
Q9QYB1	Chloride intracellular channel protein 4	Clic4	18	1.26964	0.000468146
Q9DAX2	Lipid phosphate phosphohydrolase 2	Ppap2c	3	1.26781	0.000962331
Q62419	Endophilin-A2	Sh3gl1	19	1.258	0.000247618
P62983	Ubiquitin-40S ribosomal protein S27a;Ubiquitin;40S ribosomal protein S27a;Ubiquitin-60S ribosomal protein L40;Ubiquitin;60S ribosomal protein L40;Polyubiquitin-B;Ubiquitin;Polyubiquitin-C;Ubiquitin;Ubiquitin-related 1;Ubiquitin-related 2	Rps27a;Uba52;Ubb;Ubc	11	1.2565	9.01966e-07
P52196	Thiosulfate sulfurtransferase	Tst	1	1.25624	0.000358331
Q8BTM8	Filamin-A	Flna	69	1.2557	3.82677e-06
Q62465	Synaptic vesicle membrane protein VAT-1 homolog	Vat1	17	1.24448	0.000772713
Q9WVA4	Transgelin-2	Tagln2	16	1.23551	0.000430592
O88342	WD repeat-containing protein 1	Wdr1	32	1.2317	0.000221226
P43406	Integrin alpha-V;Integrin alpha-V heavy chain;Integrin alpha-V light chain	Itgav	45	1.23089	0.000174927
P61079	Ubiquitin-conjugating enzyme E2 D3;Ubiquitin-conjugating enzyme E2 D2	Ube2d3;Ube2d2	3	1.23004	0.000168913
Q69ZN7	Myoferlin	Myof	72	1.22878	0.00024467
P35456	Urokinase plasminogen activator surface receptor	Plaur	4	1.22789	0.00162961
Q61553	Fascin	Fscn1	28	1.22441	0.000553258
Q01853	Transitional endoplasmic reticulum ATPase	Vcp	41	1.22305	0.000120362
Q99JW5	Epithelial cell adhesion molecule	Epcam	19	1.21579	0.000340769
P40124	Adenylyl cyclase-associated protein 1	Cap1	25	1.21151	0.000421065
Q8BHL4	Retinoic acid-induced protein 3	Gprc5a	6	1.19249	0.000506344
P61161	Actin-related protein 2	Actr2	18	1.17886	0.000844107
Q9WU78	Programmed cell death 6-interacting protein	Pdcd6ip	62	1.1518	0.000792154

## Sheet: Sheet_c
Proteins overexpressed in EVs from 4T1 shRalA cells Vs EVs from shCtl cells (FDR 1%)
Majority_protein_IDs	Protein_names	Gene_names	Unique_peptides	FC	P_Value
P20152	Vimentin	Vim	16	8.52107	3.23245e-15
O70475	UDP-glucose 6-dehydrogenase	Ugdh	9	5.92775	4.31137e-07
P18052	Receptor-type tyrosine-protein phosphatase alpha	Ptpra	12	4.28117	7.29843e-09
Q9CYL5	Golgi-associated plant pathogenesis-related protein 1	Glipr2	3	4.07075	4.52534e-09
P62141	Serine/threonine-protein phosphatase PP1-beta catalytic subunit	Ppp1cb	2	3.1404	4.30907e-05
Q9WVL3	Solute carrier family 12 member 7	Slc12a7	11	3.12638	6.70413e-05
Q9ES97	Reticulon-3	Rtn3	1	2.94645	0.00124488
Q9EPR4	Solute carrier family 23 member 2	Slc23a2	4	2.9143	4.99535e-07
Q61087	Laminin subunit beta-3	Lamb3	23	2.859	1.37765e-10
P21981	Protein-glutamine gamma-glutamyltransferase 2	Tgm2	5	2.84223	7.03673e-06
P61226	Ras-related protein Rap-2b	Rap2b	5	2.83317	0.00030541
P46471	26S protease regulatory subunit 7	Psmc2	2	2.75597	4.89909e-06
Q9JLQ2	ARF GTPase-activating protein GIT2	Git2	7	2.7477	9.43759e-10
Q05D44	Eukaryotic translation initiation factor 5B	Eif5b	9	2.73776	4.58408e-05
Q69ZF7	Metal transporter CNNM4	Cnnm4	10	2.70793	0.000565692
Q61140	Breast cancer anti-estrogen resistance protein 1	Bcar1	5	2.69984	0.0013762
P28867	Protein kinase C delta type;Protein kinase C delta type regulatory subunit;Protein kinase C delta type catalytic subunit	Prkcd	4	2.62432	5.51222e-06
Q9Z0P4	Paralemmin-1	Palm	6	2.53644	8.59618e-05
Q3TZZ7	Extended synaptotagmin-2	Esyt2	5	2.50569	6.28607e-05
O70161	Phosphatidylinositol 4-phosphate 5-kinase type-1 gamma	Pip5k1c	6	2.46584	0.000142726
P16546	Spectrin alpha chain, non-erythrocytic 1	Sptan1	27	2.45845	1.51238e-05
Q9ES28	Rho guanine nucleotide exchange factor 7	Arhgef7	20	2.41171	8.01586e-05
P60122	RuvB-like 1	Ruvbl1	9	2.39161	3.62729e-05
Q68FF6	ARF GTPase-activating protein GIT1	Git1	14	2.34928	7.87713e-07
Q8BTY2	Sodium bicarbonate cotransporter 3	Slc4a7	11	2.2838	5.56745e-06
O54833	Casein kinase II subunit alpha	Csnk2a2	7	2.24655	1.45491e-06
Q62312	TGF-beta receptor type-2	Tgfbr2	17	2.2281	0.000255793
Q8CGC7	Bifunctional glutamate/proline--tRNA ligase;Glutamate--tRNA ligase;Proline--tRNA ligase	Eprs	18	2.2151	5.0821e-06
B2RRE7	OTU domain-containing protein 4	Otud4	6	2.17701	0.00107652
Q9Z1Q9	Valine--tRNA ligase	Vars	30	2.14485	1.94007e-06
P51432	1-phosphatidylinositol 4,5-bisphosphate phosphodiesterase beta-3	Plcb3	9	2.14418	1.70214e-08
O09044	Synaptosomal-associated protein 23	Snap23	9	2.13404	1.45776e-05
Q61206	Platelet-activating factor acetylhydrolase IB subunit beta	Pafah1b2	5	2.12832	3.74167e-05
Q62469	Integrin alpha-2	Itga2	40	2.0391	1.62604e-09
Q9JHZ2	Progressive ankylosis protein	Ankh	9	2.01786	1.05709e-07
Q8BGK6	Y+L amino acid transporter 2	Slc7a6	6	2.00364	9.69174e-05
P62821	Ras-related protein Rab-1A	Rab1A	8	1.9967	1.56606e-05
P55012	Solute carrier family 12 member 2	Slc12a2	18	1.98149	3.61824e-09
P63280	SUMO-conjugating enzyme UBC9	Ube2i	2	1.96713	0.00141327
Q80Y17	Lethal(2) giant larvae protein homolog 1	Llgl1	14	1.90853	0.00012141
Q62523	Zyxin	Zyx	16	1.88367	7.1855e-05
P97371	Proteasome activator complex subunit 1	Psme1	3	1.87791	0.00045646
P06795	Multidrug resistance protein 1B	Abcb1b	18	1.87433	0.000332525
Q9Z0F8	Disintegrin and metalloproteinase domain-containing protein 17	Adam17	6	1.83994	0.000128111
Q91Z67	SLIT-ROBO Rho GTPase-activating protein 2	Srgap2	17	1.82414	8.26749e-06
Q9CQM5	Thioredoxin domain-containing protein 17	Txndc17	3	1.81088	7.97185e-08
Q6PIX5	Inactive rhomboid protein 1	Rhbdf1	4	1.80531	0.00131176
Q9D0I9	Arginine--tRNA ligase, cytoplasmic	Rars	20	1.80255	0.000153926
Q9CQW2	ADP-ribosylation factor-like protein 8B	Arl8b	2	1.76352	0.000805614
P61953	Guanine nucleotide-binding protein G(I)/G(S)/G(O) subunit gamma-11	Gng11	1	1.75848	0.00092823
Q9CZ30	Obg-like ATPase 1	Ola1	13	1.75645	0.000195366
Q99JI4	26S proteasome non-ATPase regulatory subunit 6	Psmd6	4	1.74523	0.000577074
Q64010	Adapter molecule crk	Crk	5	1.73412	0.00146762
Q5SYD0	Unconventional myosin-Id	Myo1d	38	1.73301	1.40248e-08
P06869	Urokinase-type plasminogen activator;Urokinase-type plasminogen activator long chain A;Urokinase-type plasminogen activator short chain A;Urokinase-type plasminogen activator chain B	Plau	22	1.71865	6.0724e-08
P62082	40S ribosomal protein S7	Rps7	8	1.69911	7.05503e-05
Q61656	Probable ATP-dependent RNA helicase DDX5;Probable ATP-dependent RNA helicase DDX17	Ddx5;Ddx17	3	1.67712	0.00126327
Q8BTH8	Casein kinase I isoform gamma-1	Csnk1g1	2	1.67068	0.000137553
P49769	Presenilin-1;Presenilin-1 NTF subunit;Presenilin-1 CTF subunit;Presenilin-1 CTF12	Psen1	5	1.66842	2.75282e-07
Q09143	High affinity cationic amino acid transporter 1	Slc7a1	11	1.66834	2.72244e-05
Q8C0Z1	Protein ITFG3	Itfg3	12	1.65787	8.16866e-07
Q9ER63	Tumor necrosis factor receptor superfamily member 23	Tnfrsf23	4	1.65669	0.00134443
G5E829	Plasma membrane calcium-transporting ATPase 1	Atp2b1	28	1.65176	3.74975e-07
O54962	Barrier-to-autointegration factor;Barrier-to-autointegration factor, N-terminally processed	Banf1	4	1.64026	0.000829226
P54822	Adenylosuccinate lyase	Adsl	8	1.63512	0.000823768
P57716	Nicastrin	Ncstn	12	1.62851	6.40823e-05
P53986	Monocarboxylate transporter 1	Slc16a1	13	1.62573	3.77372e-09
P51829	Adenylate cyclase type 7	Adcy7	3	1.60053	6.52652e-05
B2RXS4	Plexin-B2	Plxnb2	59	1.59051	1.85637e-09
Q8C166	Copine-1	Cpne1	7	1.58137	0.000270389
P14824	Annexin A6	Anxa6	41	1.57089	4.40765e-10
Q6P9J9	Anoctamin-6	Ano6	27	1.55549	3.90039e-07
Q9QZF2	Glypican-1;Secreted glypican-1	Gpc1	15	1.54836	1.44695e-05
P70698	CTP synthase 1	Ctps1	14	1.53519	0.000569006
O70309	Integrin beta-5	Itgb5	23	1.5301	7.97115e-05
P27601	Guanine nucleotide-binding protein subunit alpha-13	Gna13	16	1.50415	1.42414e-05
P09103	Protein disulfide-isomerase	P4hb	15	1.48364	0.000484715
P09405	Nucleolin	Ncl	12	1.47157	0.000185871
Q9QWH1	Polyhomeotic-like protein 2	Phc2	1	1.45592	4.4059e-06
Q9R0P3	S-formylglutathione hydrolase	Esd	10	1.45013	5.87351e-05
A2A863	Integrin beta-4	Itgb4	45	1.43072	0.000148515
Q6DFX2	Anthrax toxin receptor 2	Antxr2	8	1.42802	0.000263883
P97429	Annexin A4	Anxa4	21	1.42772	1.14683e-06
P01900	H-2 class I histocompatibility antigen, D-D alpha chain;H-2 class I histocompatibility antigen, alpha chain	H2-D1	6	1.42695	2.13767e-07
Q80Z96	Vang-like protein 1	Vangl1	6	1.42432	0.000589374
P35288	Ras-related protein Rab-23	Rab23	8	1.42387	0.000157783
P07091	Protein S100-A4	S100a4	1	1.41049	3.85956e-05
F8VPU2	FERM, RhoGEF and pleckstrin domain-containing protein 1	Farp1	34	1.40483	0.000101201
Q6P5F6	Zinc transporter ZIP10	Slc39a10	11	1.40363	7.76433e-06
Q9Z1W8	Potassium-transporting ATPase alpha chain 2	Atp12a	1	1.40187	0.00010998
Q03145	Ephrin type-A receptor 2	Epha2	44	1.40095	3.47546e-09
P48036	Annexin A5	Anxa5	28	1.39506	2.97049e-06
P10404	MLV-related proviral Env polyprotein;Surface protein;Transmembrane protein		4	1.38886	1.55314e-07
P27773	Protein disulfide-isomerase A3	Pdia3	15	1.38844	0.000525276
Q8VDW0	ATP-dependent RNA helicase DDX39A;Spliceosome RNA helicase Ddx39b	Ddx39a;Ddx39b	5	1.36526	0.000217695
Q9EQP2	EH domain-containing protein 4	Ehd4	30	1.35312	3.09519e-06
Q9DC51	Guanine nucleotide-binding protein G(k) subunit alpha	Gnai3	12	1.35227	9.02597e-05
O89086	RNA-binding protein 3	Rbm3	4	1.35132	0.000100114
P19157	Glutathione S-transferase P 1;Glutathione S-transferase P 2	Gstp1;Gstp2	7	1.34485	0.000798479
Q60634	Flotillin-2	Flot2	15	1.34334	7.58827e-06
Q63739	Protein tyrosine phosphatase type IVA 1	Ptp4a1	5	1.3273	0.000147793
P62835	Ras-related protein Rap-1A	Rap1a	6	1.31839	0.000264375
Q9CQC9	GTP-binding protein SAR1b	Sar1b	3	1.30999	0.0017347
P20029	78 kDa glucose-regulated protein	Hspa5	26	1.29246	0.000257795
Q9QUM0	Integrin alpha-IIb;Integrin alpha-IIb heavy chain;Integrin alpha-IIb light chain	Itga2b	3	1.2917	0.000944984
P62874	Guanine nucleotide-binding protein G(I)/G(S)/G(T) subunit beta-1	Gnb1	10	1.27387	0.000165469
Q9D8N0	Elongation factor 1-gamma	Eef1g	24	1.27292	6.7771e-05
P10126	Elongation factor 1-alpha 1	Eef1a1	18	1.27289	0.000371414
P10852	4F2 cell-surface antigen heavy chain	Slc3a2	28	1.2704	6.69159e-06
Q8K2J0	1-phosphatidylinositol 4,5-bisphosphate phosphodiesterase delta-3	Plcd3	21	1.2428	0.000224448
Q8VDN2	Sodium/potassium-transporting ATPase subunit alpha-1	Atp1a1	51	1.23817	0.000447877
P18572	Basigin	Bsg	11	1.23475	1.91883e-05
Q8CIN4	Serine/threonine-protein kinase PAK 2;PAK-2p27;PAK-2p34	Pak2	17	1.2338	0.00107556
Q9EPK8	Transient receptor potential cation channel subfamily V member 4	Trpv4	20	1.23323	0.0014419
Q6X893	Choline transporter-like protein 1	Slc44a1	18	1.22531	0.000578635
Q9CQ65	S-methyl-5-thioadenosine phosphorylase	Mtap	14	1.2179	0.000644645
Q8BH64	EH domain-containing protein 2	Ehd2	35	1.21579	0.000720579
Q5S248	Transmembrane protease serine 11E;Transmembrane protease serine 11E non-catalytic chain;Transmembrane protease serine 11E catalytic chain	Tmprss11e	20	1.20225	0.000804407
Q6R0H7	Guanine nucleotide-binding protein G(s) subunit alpha isoforms XLas;Guanine nucleotide-binding protein G(s) subunit alpha isoforms short	Gnas	19	1.18099	0.000496422

## Sheet: Sheet_d
Proteins overexpressed in EVs from 4T1 shCtl cells Vs EVs from shRalB cells (FDR 1%)
Majority_protein_IDs	Protein_names	Gene_names	Unique_peptides	FC	P_Value
Q8BFZ3	Beta-actin-like protein 2	Actbl2	2	8.02071	3.57809e-05
Q9JIW9	Ras-related protein Ral-B	Ralb	6	4.01317	2.0582e-15
Q8R2Y2	Cell surface glycoprotein MUC18	Mcam	13	3.3831	5.20531e-08
P32299	B2 bradykinin receptor	Bdkrb2	3	2.54439	0.000165864
Q9JHR7	Insulin-degrading enzyme	Ide	10	2.12016	0.000120445
P45377	Aldose reductase-related protein 2	Akr1b8	3	2.09034	0.000255544
P51655	Glypican-4;Secreted glypican-4	Gpc4	16	1.87779	7.29336e-09
Q5Y5T1	Probable palmitoyltransferase ZDHHC20	Zdhhc20	3	1.875	0.00047521
P45376	Aldose reductase	Akr1b1	13	1.74173	1.97374e-08
Q9CR57	60S ribosomal protein L14	Rpl14	4	1.64886	5.2263e-05
Q7TMS5	ATP-binding cassette sub-family G member 2	Abcg2	11	1.56602	0.000164102
Q8VEN2	Placenta-expressed transcript 1 protein	Plet1	2	1.39449	6.87487e-05
Q9QYB1	Chloride intracellular channel protein 4	Clic4	18	1.37439	1.93596e-05

## Sheet: Sheet_e
Proteins overexpressed in EVs from 4T1 shRalB cells Vs EVs from shCtl cells (FDR 1%)
Majority_protein_IDs	Protein_names	Gene_names	Unique_peptides	FC	P_Value
Q9CQW9	Interferon-induced transmembrane protein 3	Ifitm3	3	1.21177	0.000102889
Q99J93	Interferon-induced transmembrane protein 2	Ifitm2	5	1.20035	0.000762695
P70312	Hyaluronan synthase 2	Has2	10	2.17198	0.000101465
P40237	CD82 antigen	Cd82	4	1.58152	1.23786e-06
B2RXS4	Plexin-B2	Plxnb2	59	1.25703	5.50059e-05
A2A8L5	Receptor-type tyrosine-protein phosphatase F	Ptprf	4	2.15276	4.09946e-06
Q9JIM1	Equilibrative nucleoside transporter 1	Slc29a1	8	1.40038	2.76096e-05
P40240	CD9 antigen	Cd9	12	1.25534	0.000143418
Q8VDZ4	Palmitoyltransferase ZDHHC5	Zdhhc5	17	1.5527	6.44584e-06
Q8BJU2	Tetraspanin-9	Tspan9	4	1.33993	0.000485003
P18052	Receptor-type tyrosine-protein phosphatase alpha	Ptpra	12	1.84283	0.000693338
P53986	Monocarboxylate transporter 1	Slc16a1	13	1.5279	3.50852e-08
Q3V3F6	Myelin protein zero-like protein 3	Mpzl3	4	1.52643	8.37907e-08
P28229	Gap junction gamma-1 protein	Gjc1	2	1.43619	1.90469e-08
P97792	Coxsackievirus and adenovirus receptor homolog	Cxadr	18	1.2844	0.000226332
Q9JIZ9	Phospholipid scramblase 3	Plscr3	9	1.37476	0.000331178
Q6X893	Choline transporter-like protein 1	Slc44a1	18	1.39522	1.65268e-06
Q6P9J9	Anoctamin-6	Ano6	27	1.3531	5.97291e-05
Q8BY89	Choline transporter-like protein 2	Slc44a2	21	1.23635	0.000176936
O35682	Myeloid-associated differentiation marker	Myadm	11	1.61027	5.21424e-08
Q09143	High affinity cationic amino acid transporter 1	Slc7a1	11	1.61458	5.97869e-05
Q8BHJ6	Serine incorporator 5	Serinc5	1	1.54668	8.11141e-05
Q6P5F6	Zinc transporter ZIP10	Slc39a10	11	1.30137	0.000158242
Q6P5F7	Protein tweety homolog 3	Ttyh3	7	1.75449	6.79678e-05
Q8C0Z1	Protein ITFG3	Itfg3	12	1.5389	7.36507e-06
Q61490	CD166 antigen	Alcam	19	1.34336	0.000535663
Q80W68	Kin of IRRE-like protein 1	Kirrel	13	1.75318	0.000377615
Q03145	Ephrin type-A receptor 2	Epha2	44	1.39562	4.20167e-09
Q8R366	Immunoglobulin superfamily member 8	Igsf8	25	1.44575	1.16475e-07
P10404	MLV-related proviral Env polyprotein;Surface protein;Transmembrane protein		4	1.34971	6.05792e-07
Q9R1Q6	Transmembrane protein 176B	Tmem176b	4	1.95838	8.64384e-05
Q5U462	CUB domain-containing protein 1	Cdcp1	29	1.19915	0.000590126
O35598	Disintegrin and metalloproteinase domain-containing protein 10	Adam10	22	1.32362	2.5404e-06
Q9Z261	Claudin-7	Cldn7	3	1.22616	0.000166695
Q9WV91	Prostaglandin F2 receptor negative regulator	Ptgfrn	45	1.18943	0.000169195
Q9JHZ2	Progressive ankylosis protein	Ankh	9	2.06223	6.57697e-08
P20152	Vimentin	Vim	16	3.59513	4.6309e-11
Q3UV17	Keratin, type II cytoskeletal 2 oral	Krt76	2	2.47855	0.000119559
Q61147	Ceruloplasmin	Cp	10	2.12935	9.79285e-05
Q8C522	Endonuclease domain-containing 1 protein	Endod1	10	1.94646	0.000371906
O09044	Synaptosomal-associated protein 23	Snap23	9	1.91607	9.11108e-05
P28867	Protein kinase C delta type;Protein kinase C delta type regulatory subunit;Protein kinase C delta type catalytic subunit	Prkcd	4	1.88914	0.000638706
P62821	Ras-related protein Rab-1A	Rab1A	8	1.84925	6.47275e-05
Q8BSL7	ADP-ribosylation factor 2	Arf2	1	1.84507	0.000197943
P61953	Guanine nucleotide-binding protein G(I)/G(S)/G(O) subunit gamma-11	Gng11	1	1.82052	0.000532033
Q9WVM1	Rac GTPase-activating protein 1	Racgap1	25	1.79562	2.22341e-10
P0C0A3	Charged multivesicular body protein 6	Chmp6	4	1.74976	2.10647e-06
Q9ER63	Tumor necrosis factor receptor superfamily member 23	Tnfrsf23	4	1.72172	0.000693499
P09103	Protein disulfide-isomerase	P4hb	15	1.71568	1.44459e-05
Q8BTH8	Casein kinase I isoform gamma-1	Csnk1g1	2	1.70144	9.35139e-05
Q9CX00	IST1 homolog	Ist1	15	1.65288	8.61405e-05
O70274	Protein tyrosine phosphatase type IVA 2	Ptp4a2	5	1.65161	0.000216354
P62082	40S ribosomal protein S7	Rps7	8	1.6476	0.000137618
Q8R105	Vacuolar protein sorting-associated protein 37C	Vps37c	9	1.58255	8.79536e-08
Q9CQM5	Thioredoxin domain-containing protein 17	Txndc17	3	1.56811	4.5277e-06
Q8R0J7	Vacuolar protein sorting-associated protein 37B	Vps37b	11	1.54737	8.31727e-07
P35278	Ras-related protein Rab-5C	Rab5c	8	1.54571	0.000398323
Q8CGP2	Histone H2B type 1-P;Histone H2B type 1-K;Histone H2B type 1-C/E/G;Histone H2B type 2-B;Histone H2B type 1-H;Histone H2B type 1-B;Histone H2B type 1-M;Histone H2B type 1-F/J/L;Histone H2B type 3-A;Histone H2B type 3-B;Histone H2B type 2-E;Histone H2B type 1-A	Hist1h2bp;Hist1h2bk;Hist1h2bc;Hist2h2bb;Hist1h2bh;Hist1h2bb;Hist1h2bm;Hist1h2bf;Hist3h2ba;Hist3h2bb;Hist2h2be;Hist1h2ba	6	1.51922	8.2711e-05
Q5SYD0	Unconventional myosin-Id	Myo1d	38	1.51154	1.11845e-06
Q61187	Tumor susceptibility gene 101 protein	Tsg101	23	1.50581	6.42154e-09
Q99KN1	Arrestin domain-containing protein 1	Arrdc1	18	1.4921	5.59235e-08
Q99JZ0	Syntenin-2	Sdcbp2	13	1.45595	6.36118e-06
E9Q5G3	Kinesin-like protein KIF23	Kif23	31	1.45443	8.75478e-07
P07091	Protein S100-A4	S100a4	1	1.41499	3.45661e-05
Q9CR26	Vacuolar protein sorting-associated protein VTA1 homolog	Vta1	6	1.38778	3.72229e-05
Q9D8E6	60S ribosomal protein L4	Rpl4	16	1.3667	3.52368e-06
Q9EQP2	EH domain-containing protein 4	Ehd4	30	1.35412	2.99374e-06
P43274	Histone H1.4	Hist1h1e	2	1.34512	0.00034872
Q8BT60	Copine-3	Cpne3	14	1.34187	0.000330462
P84228	Histone H3.2	Hist1h3b	1	1.31376	0.000564765
Q9DC53	Copine-8	Cpne8	32	1.29909	4.50203e-06
P25911	Tyrosine-protein kinase Lyn	Lyn	21	1.29439	0.00042005
Q8BH64	EH domain-containing protein 2	Ehd2	35	1.2916	4.13146e-05
P46467	Vacuolar protein sorting-associated protein 4B	Vps4b	11	1.28361	0.00079893
P20029	78 kDa glucose-regulated protein	Hspa5	26	1.28333	0.000342917
Q8BGX0	E3 ubiquitin-protein ligase TRIM23	Trim23	1	1.27434	0.000178526
Q99JR5	Tubulointerstitial nephritis antigen-like	Tinagl1	22	1.26795	6.2355e-05
P84244	Histone H3.3;Histone H3.3C	H3f3a;H3f3c	1	1.26293	0.000554646
P99024	Tubulin beta-5 chain	Tubb5	5	1.23497	6.70493e-05
P48036	Annexin A5	Anxa5	28	1.2325	0.000657712
Q9WU78	Programmed cell death 6-interacting protein	Pdcd6ip	62	1.22931	1.21651e-05
P62806	Histone H4	Hist1h4a	8	1.22141	2.21602e-05
P47962	60S ribosomal protein L5	Rpl5	11	1.21904	0.0007656
Q8BKX1	Brain-specific angiogenesis inhibitor 1-associated protein 2	Baiap2	27	1.19924	0.000179649

## Sheet: Sheet_f
Proteins overexpressed in EVs from 4T1 shCtl cells Vs EVs from shRalA cells and Vs EVs from shRalB cells (FDR 1%)
Majority_protein_IDs	Protein_names	Gene_names
Q8R2Y2	Cell surface glycoprotein MUC18	Mcam
P32299	B2 bradykinin receptor	Bdkrb2
P51655	Glypican-4;Secreted glypican-4	Gpc4
Q7TMS5	ATP-binding cassette sub-family G member 2	Abcg2
Q9QYB1	Chloride intracellular channel protein 4	Clic4
